# Supplementary material for: Towards artificial intelligence in mental health by improving schizophrenia prediction with multiple brain parcellation ensemble-learning
Source: PubMed Central journal article supplement (PMC6386753; doi:10.1038/s41537-018-0070-8), 2019-01-18

**Supplementary Table 1: Description of studies that provided machine learning model for predicting schizophrenia using resting-state brain patterns (SCZ: Schizophrenia, HC: Healthy controls; AH: Auditory Hallucinations, FE: First episode, MDD: Major Depression, CV: Cross-validation, LOO : leave one out)**

| Study               | Year | Sample size                               | Multi/Single Site                                                                            | Data Acquisition | Feature selection/reduction                                                                                 | Classifier            | CV      | Accuracy   | Reference                                                                                                                                                                                                                                                                                                                                                                                        |
|---------------------|------|-------------------------------------------|----------------------------------------------------------------------------------------------|------------------|-------------------------------------------------------------------------------------------------------------|-----------------------|---------|------------|--------------------------------------------------------------------------------------------------------------------------------------------------------------------------------------------------------------------------------------------------------------------------------------------------------------------------------------------------------------------------------------------------|
| <b>Shen</b>         | 2010 | 32 SCZ, 20 HC                             | single-site (Second Xiangya Hospital of Central South University in Changsha, China)         | Resting state    | Kendall tau correlation - low-dimensional embedding                                                         | C-Means clustering    | LOO     | 86.50%     | Shen, H., Wang, L., Liu, Y., & Hu, D. (2010). Discriminative analysis of resting-state functional connectivity patterns of schizophrenia using low dimensional embedding of fMRI. <i>NeuroImage</i> , 49(4), 3110–3121. <a href="https://doi.org/10.1016/j.neuroimage.2009.11.011">https://doi.org/10.1016/j.neuroimage.2009.11.011</a>                                                          |
| <b>Fan</b>          | 2011 | 31 SCZ, 31 HC                             | Single-site ( Institute of Mental Health, Second Xiangya Hospital, China)                    | Resting state    | ICA + Grassmann manifold                                                                                    | SVM - various kernels | LOO     | upto 87.1% | Fan, Y., Liu, Y., Wu, H., Hao, Y., Liu, H., Liu, Z., & Jiang, T. (2011). Discriminant analysis of functional connectivity patterns on Grassmann manifold. <i>NeuroImage</i> , 56(4), 2058–2067. <a href="https://doi.org/10.1016/j.neuroimage.2011.03.051">https://doi.org/10.1016/j.neuroimage.2011.03.051</a>                                                                                  |
| <b>Anderson</b>     | 2013 | 74 SCZ, 72 HC                             | single-site (COBRE dataset -multiple studies from University of New Mexico)                  | Resting state    | ICA, graph-theoretic connectivity measures such as graph density, average path length, and small-worldness. | SVM                   | 10-fold | 65%        | Anderson A, & Cohen MS. (2013). Decreased small-world functional network connectivity and clustering across resting state networks in schizophrenia: an fMRI classification tutorial. <i>Frontiers in human neuroscience</i> , 7, 520-520. doi: 10.3389/fnhum.2013.00520                                                                                                                         |
| <b>Arbabshirani</b> | 2013 | 28 SCZ, 28 HC                             | single-site (Hartford hospital and Yale)                                                     | Resting state    | ICA                                                                                                         | Multiple Learners     | LOO     | upto 96%   | Arbabshirani, M., Kiehl, K., Pearson, G., & Calhoun, V. (2013). Classification of schizophrenia patients based on resting-state functional network connectivity . <i>Frontiers in Neuroscience</i> . Retrieved from <a href="http://journal.frontiersin.org/article/10.3389/fnins.2013.00133">http://journal.frontiersin.org/article/10.3389/fnins.2013.00133</a>                                |
| <b>Yu</b>           | 2013 | 24 SCZ, 25 healthy siblings of SCZ, 22 HC | single-site (Second Xiangya Hospital of Central South University)                            | Resting state    | PCA                                                                                                         | SVM                   | LOO     | 62.00%     | Yu, Y., Shen, H., Zhang, H., Zeng, L.-L., Xue, Z., & Hu, D. (2013). Functional connectivity-based signatures of schizophrenia revealed by multiclass pattern analysis of resting-state fMRI from schizophrenic patients and their healthy siblings. <i>Biomedical Engineering Online</i> , 12, 10. <a href="https://doi.org/10.1186/1475-925X-12-10">https://doi.org/10.1186/1475-925X-12-10</a> |
| <b>Yu</b>           | 2013 | 32 SCZ, 38 HC (+19 MDD)                   | Single-site (Second Xiangya Hospital of Central South University)                            | Resting state    | intrinsic discriminant analysis                                                                             | SVM                   | LOO     | 80.9%      | Yu, Y., Shen, H., Zeng, L.-L., Ma, Q., & Hu, D. (2013). Convergent and divergent functional connectivity patterns in schizophrenia and depression. <i>PloS One</i> , 8(7), e68250. <a href="https://doi.org/10.1371/journal.pone.0068250">https://doi.org/10.1371/journal.pone.0068250</a>                                                                                                       |
| <b>Anticevic</b>    | 2014 | 90 SCZ, 90 HC                             | single-site (outpatient clinics and community mental health facilities in the Hartford area) | Resting state    | MVPA                                                                                                        | linear SVM            | LOO     | 73.9%      | Anticevic, A., Cole, M. W., Repovs, G., Murray, J. D., Brumbaugh, M. S., Winkler, A. M., ... Glahn, D. C. (2014). Characterizing thalamo-cortical disturbances in schizophrenia and bipolar illness. <i>Cerebral Cortex (New York, N.Y. : 1991)</i> , 24(12), 3116–3130. <a href="https://doi.org/10.1093/cercor/bht165">https://doi.org/10.1093/cercor/bht165</a>                               |

|                     |      |                                                                  |                                                                                                                    |                            |                                                                            |                                                         |                           |                          |                                                                                                                                                                                                                                                                                                                                                                                                                                                                       |
|---------------------|------|------------------------------------------------------------------|--------------------------------------------------------------------------------------------------------------------|----------------------------|----------------------------------------------------------------------------|---------------------------------------------------------|---------------------------|--------------------------|-----------------------------------------------------------------------------------------------------------------------------------------------------------------------------------------------------------------------------------------------------------------------------------------------------------------------------------------------------------------------------------------------------------------------------------------------------------------------|
| <b>Watanabe</b>     | 2014 | 54 SCZ, 67 HC                                                    | single-site (COBRE dataset -multiple studies from University of New Mexico)                                        | Resting state              | Fused Lasso or the GraphNet regularizer.                                   | SVM                                                     | 10-fold                   | 73.50%                   | Watanabe, T., Kessler, D., Scott, C., Angstadt, M., & Sripada, C. (2014). Disease prediction based on functional connectomes using a scalable and spatially-informed support vector machine. <i>NeuroImage</i> , 96, 183–202. <a href="https://doi.org/10.1016/j.neuroimage.2014.03.067">https://doi.org/10.1016/j.neuroimage.2014.03.067</a>                                                                                                                         |
| <b>Guo S</b>        | 2014 | 69 SCZ, 62 HC                                                    | Single-site (National Taiwan University Hospital)                                                                  | Resting state              | FC link effect                                                             | SVM                                                     | LOO                       | 80%                      | Guo, S., Kendrick, K. M., Yu, R., Wang, H.-L. S., & Feng, J. (2014). Key functional circuitry altered in schizophrenia involves parietal regions associated with sense of self. <i>Human Brain Mapping</i> , 35(1), 123–139. <a href="https://doi.org/10.1002/hbm.22162">https://doi.org/10.1002/hbm.22162</a>                                                                                                                                                        |
| <b>Brodersen</b>    | 2014 | 41 SCZ, 42 HC                                                    | Single-site (Department of Psychiatry and Psychotherapy (Campus Charité Mitte) of the Charité Universitätsmedizin) | n-back working-memory task | dynamic causal model (DCM), FC & regional activity                         | linear SVM, variational Bayesian Gaussian mixture model | 5 fold CV                 | upto 78%                 | Brodersen, K. H., Deserno, L., Schlagenhaut, F., Lin, Z., Penny, W. D., Buhmann, J. M., & Stephan, K. E. (2014). Dissecting psychiatric spectrum disorders by generative embedding. <i>NeuroImage. Clinical</i> , 4, 98–111. <a href="https://doi.org/10.1016/j.nicl.2013.11.002">https://doi.org/10.1016/j.nicl.2013.11.002</a>                                                                                                                                      |
| <b>Arbabshirani</b> | 2014 | 195 SCZ, 175 HC                                                  | multi-site (7 sites)                                                                                               | Resting state              | GICA + FC / Autoconnectivity (AR1) + minimum redundancy maximum relevancy  | SVM (various kernels)                                   | 10 fold CV ?? (not clear) | 85% ? (table says 88.2%) | Arbabshirani, M. R., Castro, E., & Calhoun, V. D. (2014). Accurate classification of schizophrenia patients based on novel resting-state fMRI features. Conference Proceedings : ... Annual International Conference of the IEEE Engineering in Medicine and Biology Society. IEEE Engineering in Medicine and Biology Society. Annual Conference, 2014, 6691–6694. <a href="https://doi.org/10.1109/EMBC.2014.6945163">https://doi.org/10.1109/EMBC.2014.6945163</a> |
| <b>Chyzyk</b>       | 2015 | 26 SCZ with history of AH, 14 SCZ without a history of AH, 28 HC |                                                                                                                    | Resting state              | Heschl's gyrus seed based FC computed by lattice auto-associative memories | SVM                                                     | 10-fold                   | upto 97.1%               | Chyzyk, D., Grana, M., Ongur, D., & Shinn, A. K. (2015). Discrimination of schizophrenia auditory hallucinators by machine learning of resting-state functional MRI. <i>International Journal of Neural Systems</i> , 25(3), 1550007. <a href="https://doi.org/10.1142/S0129065715500070">https://doi.org/10.1142/S0129065715500070</a>                                                                                                                               |
| <b>Cheng</b>        | 2015 | 19 SCZ, 29 HC                                                    | single-site (Indiana University)                                                                                   | Resting state              | Betweenness centrality                                                     | Linear SVM                                              | LOO                       | 79%                      | Cheng, H., Newman, S., Goni, J., Kent, J. S., Howell, J., Bolbecker, A., ... Hetrick, W. P. (2015). Nodal centrality of functional network in the differentiation of schizophrenia. <i>Schizophrenia Research</i> , 168(1–2), 345–352. <a href="https://doi.org/10.1016/j.schres.2015.08.011">https://doi.org/10.1016/j.schres.2015.08.011</a>                                                                                                                        |
| <b>Cheng</b>        | 2015 | 415 SCZ, 405 HC                                                  | multi-site (UK, USA, Taiwan, and China)                                                                            | Resting state              | region and voxel-based brain-wide association                              | SVM                                                     | LOO                       | 75.81 (overall)          | Cheng, W., Palaniyappan, L., Li, M., Kendrick, K. M., Zhang, J., Luo, Q., ... Feng, J. (2015). Voxel-based, brain-wide association study of aberrant functional connectivity in schizophrenia implicates thalamocortical circuitry. <i>NPJ Schizophrenia</i> , 1, 15016. <a href="https://doi.org/10.1038/npjzsch.2015.16">https://doi.org/10.1038/npjzsch.2015.16</a>                                                                                                |

|                 |      |                                                                      |                                                                                                        |                                  |                                       |                                                       |                                      |                                                     |                                                                                                                                                                                                                                                                                                                                                                                                                                                            |
|-----------------|------|----------------------------------------------------------------------|--------------------------------------------------------------------------------------------------------|----------------------------------|---------------------------------------|-------------------------------------------------------|--------------------------------------|-----------------------------------------------------|------------------------------------------------------------------------------------------------------------------------------------------------------------------------------------------------------------------------------------------------------------------------------------------------------------------------------------------------------------------------------------------------------------------------------------------------------------|
| <b>Peters</b>   | 2016 | 18 SCZ, 18 HC                                                        | single-site (Department of Psychiatry, Klinikum Rechts der Isar, TU München)                           | Resting state                    | Network and ROI FC                    | SVM                                                   | LOO                                  | 91% with allROIs-NWs                                | Peters, H., Shao, J., Scherr, M., Schwerthoffer, D., Zimmer, C., Forstl, H., ... Sorg, C. (2016). More Consistently Altered Connectivity Patterns for Cerebellum and Medial Temporal Lobes than for Amygdala and Striatum in Schizophrenia. <i>Frontiers in Human Neuroscience</i> , 10, 55. <a href="https://doi.org/10.3389/fnhum.2016.00055">https://doi.org/10.3389/fnhum.2016.00055</a>                                                               |
| <b>Mikolas</b>  | 2016 | 63 SCZ with FES, 63 HC                                               | single-site (Bohnice Psychiatric Hospital, Prague)                                                     | Resting state                    | seed-based connectivity               | Linear SVM                                            | LOO                                  | 73.00%                                              | Mikolas, P., Melicher, T., Skoch, A., Matejka, M., Slovakova, A., Bakstein, E., ... Spaniel, F. (2016). Connectivity of the anterior insula differentiates participants with first-episode schizophrenia spectrum disorders from controls: a machine-learning study. <i>Psychological Medicine</i> , 46(13), 2695–2704. <a href="https://doi.org/10.1017/S0033291716000878">https://doi.org/10.1017/S0033291716000878</a>                                  |
| <b>Cabral</b>   | 2016 | 66 SCZ, 66 HC                                                        | single-site (COBRE dataset -multiple studies from University of New Mexico)                            | Resting state (+ Structural MRI) | mutual Information + PCA              | L2-regularized Logistic Regression                    | 20 x 20 repeated double CV framework | 70.5% (75% when combined with structural)           | Cabral, C., Kambeitz-Ilankovic, L., Kambeitz, J., Calhoun, V. D., Dwyer, D. B., von Salder, S., ... Koutsouleris, N. (2016). Classifying Schizophrenia Using Multimodal Multivariate Pattern Recognition Analysis: Evaluating the Impact of Individual Clinical Profiles on the Neurodiagnostic Performance. <i>Schizophrenia Bulletin</i> , 42 Suppl 1, S110-7. <a href="https://doi.org/10.1093/schbul/sbw053">https://doi.org/10.1093/schbul/sbw053</a> |
| <b>Skåtun</b>   | 2016 | 182 SCZ spectrum, 348 HC                                             | multi-site (1 from the University of Oslo, Norway and 2 from Karolinska Institutet, Stockholm, Sweden) | Resting state                    | ICA                                   | regularized linear discriminant analysis              |                                      | upto 78.3%                                          | Skatun, K. C., Kaufmann, T., Doan, N. T., Alnaes, D., Cordova-Palamera, A., Jonsson, E. G., ... Westlye, L. T. (2016). Consistent Functional Connectivity Alterations in Schizophrenia Spectrum Disorder: A Multisite Study. <i>Schizophrenia Bulletin</i> . <a href="https://doi.org/10.1093/schbul/sbw145">https://doi.org/10.1093/schbul/sbw145</a>                                                                                                     |
| <b>Yang</b>     | 2016 | 40 SCZ, 46 HC                                                        | single-site (University of New Mexico, USA.)                                                           | Resting state(+ Structural MRI)  | GICA                                  | SVM, Maximum-uncertainty linear discriminant analysis |                                      | 77-91% (combined)                                   | Yang, H., He, H., & Zhong, J. (2016). Multimodal MRI characterisation of schizophrenia: a discriminative analysis. <i>Lancet (London, England)</i> , 388 Suppl, S36. <a href="https://doi.org/10.1016/S0140-6736(16)31963-8">https://doi.org/10.1016/S0140-6736(16)31963-8</a>                                                                                                                                                                             |
| <b>Iwabuchi</b> | 2017 | 62 SCZ, 71 HC                                                        | single-site (COBRE dataset -multiple studies from University of New Mexico)                            | Resting state                    | seed-based Granger causality analysis | SVM-multiple kernel learning classifier               | LOO                                  | 78.04% (ReHO) - combined was lesser                 | Iwabuchi, S. J., & Palaniyappan, L. (2017). Abnormalities in the effective connectivity of visuothalamic circuitry in schizophrenia. <i>Psychological Medicine</i> , 1–11. <a href="https://doi.org/10.1017/S0033291716003469">https://doi.org/10.1017/S0033291716003469</a>                                                                                                                                                                               |
| <b>Lottman</b>  | 2017 | 34 unmedicated (17 drug-naïve) SCZ + follow-up post-treatment, 35 HC | single-site (University of Alabama at Birmingham)                                                      | Resting state                    | GICA -Static & Dynamic FC             | linear SVM                                            | LOO                                  | 83.8% (combined static & Dynamic FC) - static only: | Lottman, K. K., Kraguljac, N. V., White, D. M., Morgan, C. J., Calhoun, V. D., Butt, A., & Lahti, A. C. (2017). Risperidone Effects on Brain Dynamic Connectivity-A Prospective Resting-State fMRI Study in Schizophrenia. <i>Frontiers in Psychiatry</i> , 8, 14. <a href="https://doi.org/10.3389/fpsyt.2017.00014">https://doi.org/10.3389/fpsyt.2017.00014</a>                                                                                         |

|              |      |                                                       |                                                                                                          |               |                                       |         |     |                         | 73.5%                                                                                                                                                                                                                                                                                                           |
|--------------|------|-------------------------------------------------------|----------------------------------------------------------------------------------------------------------|---------------|---------------------------------------|---------|-----|-------------------------|-----------------------------------------------------------------------------------------------------------------------------------------------------------------------------------------------------------------------------------------------------------------------------------------------------------------|
| <b>Guo W</b> | 2017 | 28 FE drug-naive SCZ, 28 family-based controls, 40 HC | single-site (Mental Health Center of the First Affiliated Hospital, Guangxi Medical University in China) | Resting state | Voxel-mirrored homotopic connectivity | rbf SVM | LOO | 92.86% (overfitting ??) | Guo, W., Liu, F., Chen, J., Wu, R., Li, L., Zhang, Z., & Zhao, J. (2017). Family-based case-control study of homotopic connectivity in first-episode, drug-naive schizophrenia at rest. <i>Scientific Reports</i> , 7, 43312. <a href="https://doi.org/10.1038/srep43312">https://doi.org/10.1038/srep43312</a> |

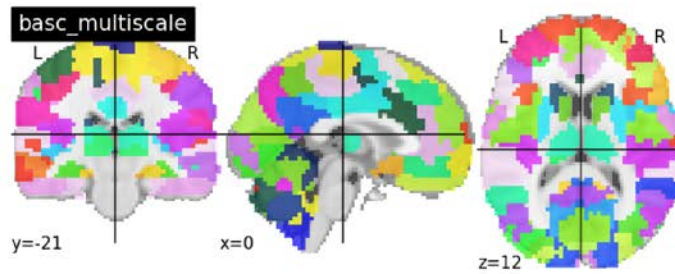

Multi-level bootstrap analysis of stable clusters

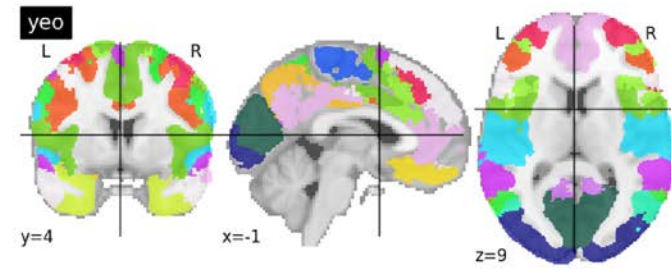

Intrinsic functional connectivity

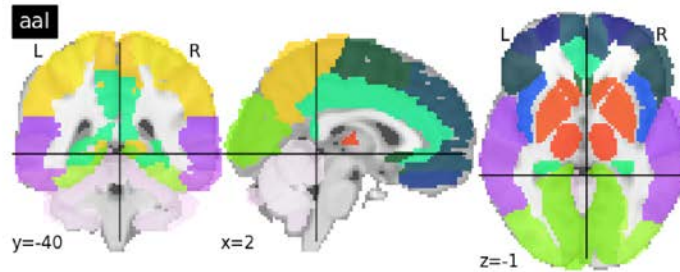

Automated Anatomical Labeling

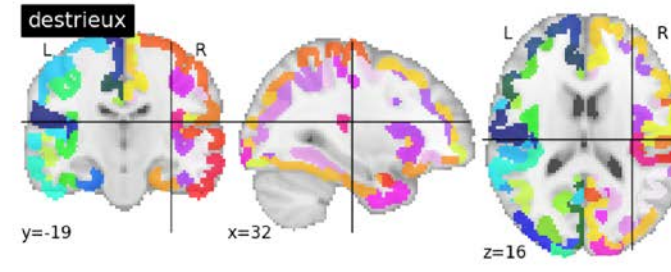

Sulcal depth-based anatomical parcellation

Supplementary Figure 1 : MRI overlay of representative atlases that were used for parcellation in the study.

The coordinate mapping information used to these create figures comes from public data made available by the studies cited in the manuscript. Here, the basic boundaries of 3D areas from the schematic atlases is redrawn on one of our study subjects.

Supplementary Table 2. Demographic and clinical profile of study subjects

| Characteristic                                | Schizophrenia | Control      | Stat    | p      |
|-----------------------------------------------|---------------|--------------|---------|--------|
| <b>N</b>                                      | 81            | 93           |         |        |
| <b>Sex [M:F]</b>                              | 53:28         | 60:33        | 0.001 ¶ | 0.97   |
| <b>Age</b>                                    | 30.72 ± 6.16  | 29.41 ± 5.71 | 1.45 §  | 0.15   |
| <b>Total Intracranial Volume (TICV, mL)</b>   | 1400 ± 135    | 1480 ± 144   | 3.76 §  | <0.001 |
| <b>Age at onset</b>                           | 26.6 ± 6.17   | -            | -       | -      |
| <b>Duration of untreated illness (months)</b> | 36.95 ± 51.08 | -            | -       | -      |
| <b>Total positive symptoms (SAPS)</b>         | 27.65 ± 12.22 | -            | -       | -      |
| <b>Total negative symptoms (SANS)</b>         | 32.11 ± 27.79 | -            | -       | -      |

§ Independent Samples Test [t]

¶ Chi-Square test [ $\chi^2$ ]

Men had significantly greater TICV than women (Stat<sup>§</sup> = 6.7, p < 0.001), and age showed significant negative correlation with TICV (pearson r = -0.24, p = 0.001)

Supplementary Table 3. Performance accuracy in percentage of single-source and stacked models for various feature-type and parcellations

|                            | FC_corr |       | FC_part |       | FC_prec |       | ALFF |       | ReHo |       | fALFF |       |
|----------------------------|---------|-------|---------|-------|---------|-------|------|-------|------|-------|-------|-------|
|                            | Mean    | Stdev | Mean    | Stdev | Mean    | Stdev | Mean | Stdev | Mean | Stdev | Mean  | Stdev |
| <b>harvard_sub_25</b>      | 0.67    | 0.12  | 0.55    | 0.12  | 0.52    | 0.10  | 0.67 | 0.10  | 0.69 | 0.10  | 0.61  | 0.11  |
| <b>smith20</b>             | 0.68    | 0.12  | 0.63    | 0.11  | 0.65    | 0.10  | 0.64 | 0.12  | 0.67 | 0.12  | 0.67  | 0.12  |
| <b>msdl</b>                | 0.72    | 0.12  | 0.59    | 0.11  | 0.59    | 0.11  | 0.67 | 0.09  | 0.71 | 0.10  | 0.70  | 0.11  |
| <b>harvard_cort_25</b>     | 0.67    | 0.12  | 0.67    | 0.10  | 0.70    | 0.11  | 0.70 | 0.11  | 0.70 | 0.12  | 0.73  | 0.12  |
| <b>yeo</b>                 | 0.67    | 0.11  | 0.71    | 0.10  | 0.71    | 0.09  | 0.69 | 0.11  | 0.71 | 0.10  | 0.72  | 0.10  |
| <b>smith70</b>             | 0.79    | 0.11  | 0.73    | 0.12  | 0.76    | 0.09  | 0.69 | 0.11  | 0.73 | 0.10  | 0.70  | 0.11  |
| <b>aal</b>                 | 0.71    | 0.09  | 0.75    | 0.11  | 0.78    | 0.12  | 0.72 | 0.11  | 0.72 | 0.11  | 0.73  | 0.10  |
| <b>destrieux</b>           | 0.73    | 0.11  | 0.74    | 0.09  | 0.75    | 0.09  | 0.74 | 0.10  | 0.75 | 0.11  | 0.72  | 0.11  |
| <b>dosenbach</b>           | 0.75    | 0.09  | 0.74    | 0.10  | 0.75    | 0.10  | 0.73 | 0.10  | 0.74 | 0.11  | 0.75  | 0.11  |
| <b>basc_multiscale_122</b> | 0.76    | 0.09  | 0.78    | 0.09  | 0.78    | 0.09  | 0.74 | 0.10  | 0.73 | 0.11  | 0.75  | 0.10  |
| <b>power</b>               | 0.75    | 0.11  | 0.75    | 0.08  | 0.77    | 0.10  | 0.79 | 0.10  | 0.76 | 0.10  | 0.75  | 0.11  |
| <b>basc_multiscale_197</b> | 0.82    | 0.11  | 0.80    | 0.08  | 0.82    | 0.09  | 0.77 | 0.10  | 0.76 | 0.11  | 0.72  | 0.11  |
| <b>basc_multiscale_325</b> | 0.81    | 0.10  | 0.79    | 0.09  | 0.81    | 0.09  | 0.78 | 0.09  | 0.76 | 0.10  | 0.75  | 0.11  |
| <b>basc_multiscale_444</b> | 0.81    | 0.09  | 0.77    | 0.08  | 0.83    | 0.10  | 0.77 | 0.10  | 0.77 | 0.11  | 0.78  | 0.08  |
| <b>stack_*</b>             | 0.82    | 0.09  | 0.79    | 0.10  | 0.84    | 0.08  | 0.76 | 0.10  | 0.74 | 0.11  | 0.75  | 0.10  |

Supplementary Table 4. Model performance (in percentage) of the various parcellation-wise stacked learners: average (standard errors). All results are 10-fold CV.

|                                    | Accuracy   | Precision  | Sensitivity | Specificity |
|------------------------------------|------------|------------|-------------|-------------|
| <b>stacked-multi</b>               | 86.9 (1.1) | 91.9 (1.4) | 79.8 (1.8)  | 93.1 (1.2)  |
| <b>stacked-aal</b>                 | 81.0 (1.4) | 83.1 (1.9) | 76.1 (2.1)  | 85.3 (1.6)  |
| <b>stacked-basc_multiscale_122</b> | 82.4 (1.3) | 86.0 (1.8) | 76.1 (1.6)  | 87.9 (1.7)  |
| <b>stacked-basc_multiscale_197</b> | 85.9 (1.0) | 89.9 (1.3) | 79.9 (1.8)  | 91.1 (1.3)  |
| <b>stacked-basc_multiscale_325</b> | 85.3 (1.1) | 89.6 (1.4) | 78.2 (1.8)  | 91.5 (1.2)  |
| <b>stacked-basc_multiscale_444</b> | 85.8 (1.3) | 89.8 (1.6) | 80.2 (2.3)  | 90.7 (1.6)  |
| <b>stacked-destrieux</b>           | 81.2 (1.3) | 86.2 (1.8) | 72.7 (2.2)  | 88.6 (1.6)  |
| <b>stacked-dosenbach</b>           | 82.8 (1.4) | 87.3 (1.7) | 76.1 (2.2)  | 88.6 (1.8)  |
| <b>stacked-harvard_cort_25</b>     | 71.4 (1.7) | 74.7 (2.3) | 61.9 (2.7)  | 79.7 (2.2)  |
| <b>stacked-harvard_sub_25</b>      | 65.1 (1.8) | 64.5 (2.4) | 58.8 (2.7)  | 70.5 (2.2)  |
| <b>stacked-msdl</b>                | 69.5 (1.6) | 69.7 (1.9) | 62.1 (2.5)  | 75.9 (1.9)  |
| <b>stacked-power</b>               | 81.1 (1.5) | 82.3 (1.9) | 77.8 (2.3)  | 84.0 (1.9)  |
| <b>stacked-smith20</b>             | 69.9 (1.4) | 71.8 (2.2) | 62.5 (2.1)  | 76.4 (2.0)  |
| <b>stacked-smith70</b>             | 78.9 (1.2) | 83.8 (1.8) | 70.8 (2.2)  | 85.9 (1.8)  |
| <b>stacked-yeo</b>                 | 72.8 (1.3) | 71.8 (1.5) | 69.9 (2.2)  | 75.3 (1.6)  |



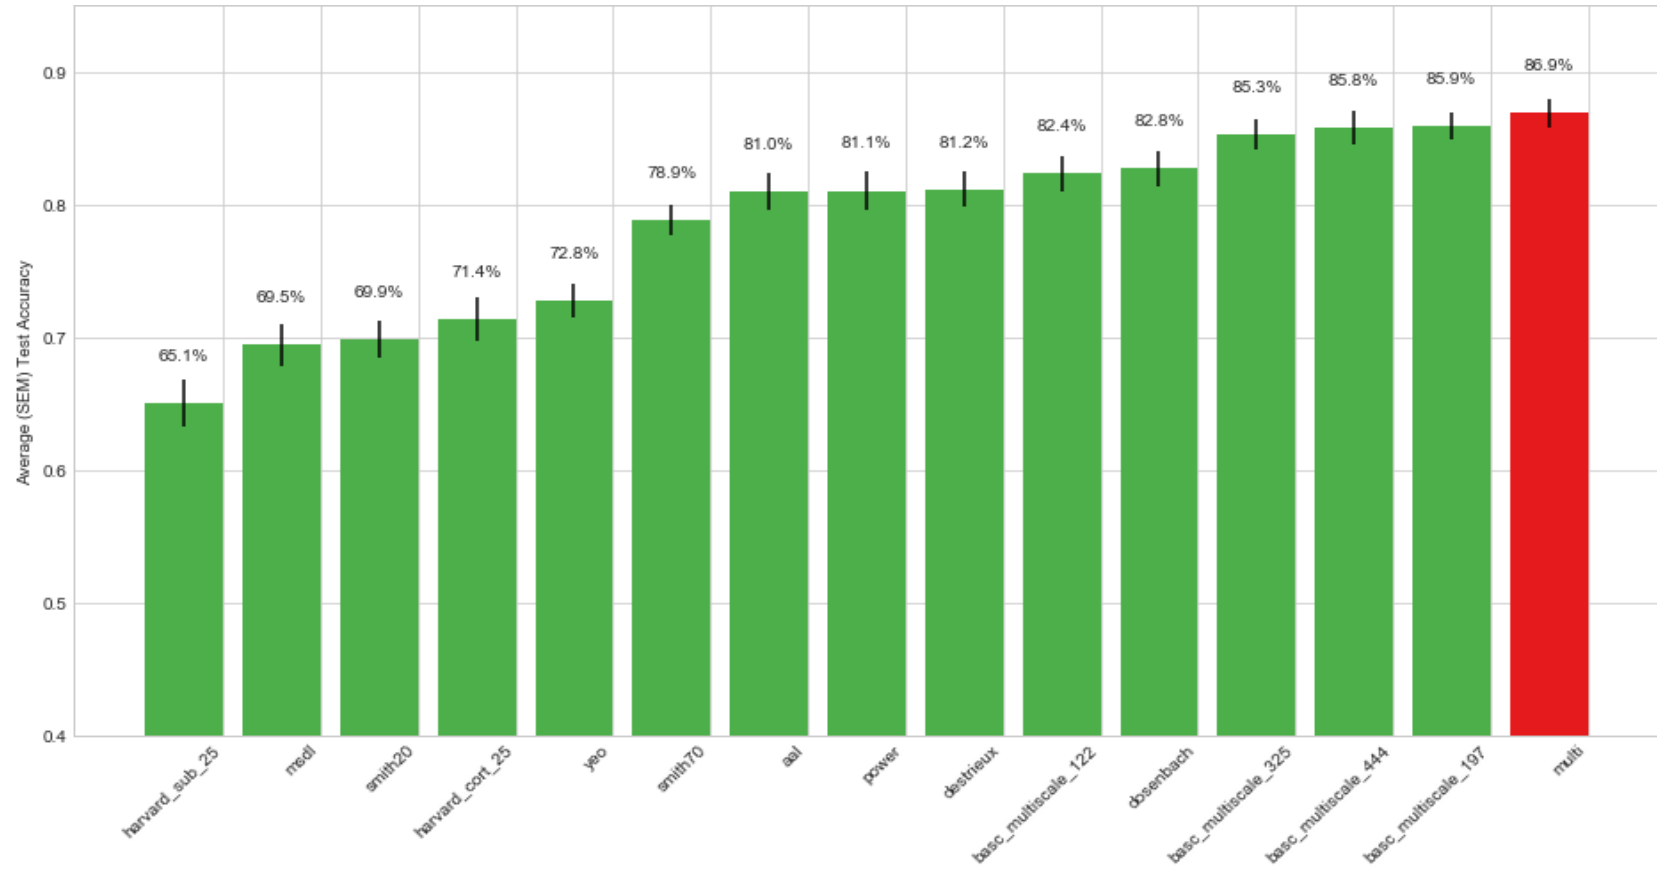

Supplementary Figure 2. Comparison of 10-fold cross-validation prediction accuracies for parcellation-wise stacked learners.

Supplementary Table 5. Performance in percentage of multi-source ensemble models with various feature selection (FS) / reduction criteria (Average and standard errors)

|                                | Accuracy           | Precision          | Sensitivity       | Specificity        |
|--------------------------------|--------------------|--------------------|-------------------|--------------------|
| PCA                            | <b>0.87 (0.01)</b> | <b>0.92 (0.01)</b> | <b>0.8 (0.02)</b> | <b>0.93 (0.01)</b> |
| Top 0.5 % FS                   | 0.82 (0.01)        | 0.92 (0.01)        | 0.67 (0.02)       | 0.95 (0.01)        |
| Top 1 % FS                     | 0.82 (0.01)        | 0.92 (0.01)        | 0.69 (0.02)       | 0.94 (0.01)        |
| Top 2 % FS                     | 0.83 (0.01)        | 0.93 (0.01)        | 0.69 (0.02)       | 0.95 (0.01)        |
| Top 5 % FS                     | 0.83 (0.01)        | 0.93 (0.01)        | 0.69 (0.02)       | 0.95 (0.01)        |
| Top 10 % FS                    | 0.83 (0.01)        | 0.93 (0.01)        | 0.69 (0.02)       | 0.95 (0.01)        |
| Top 20 % FS                    | 0.82 (0.01)        | 0.91 (0.01)        | 0.7 (0.02)        | 0.94 (0.01)        |
| Top 30 % FS                    | 0.83 (0.01)        | 0.93 (0.02)        | 0.69 (0.02)       | 0.95 (0.01)        |
| Top 30 % FC, 100 % Regional FS | 0.84 (0.01)        | 0.92 (0.01)        | 0.72 (0.02)       | 0.94 (0.01)        |
| All 100 % FS (No FS)           | 0.85 (0.01)        | 0.93 (0.01)        | 0.73 (0.02)       | 0.95 (0.01)        |

Comparison of prediction accuracy for stacked models with various feature selection/reduction methods.  
Final ensemble model shown in red.

fALFF  
Comparison across various feature selection / reduction methods  
10 fold cross-validation - 5 shuffled iterations

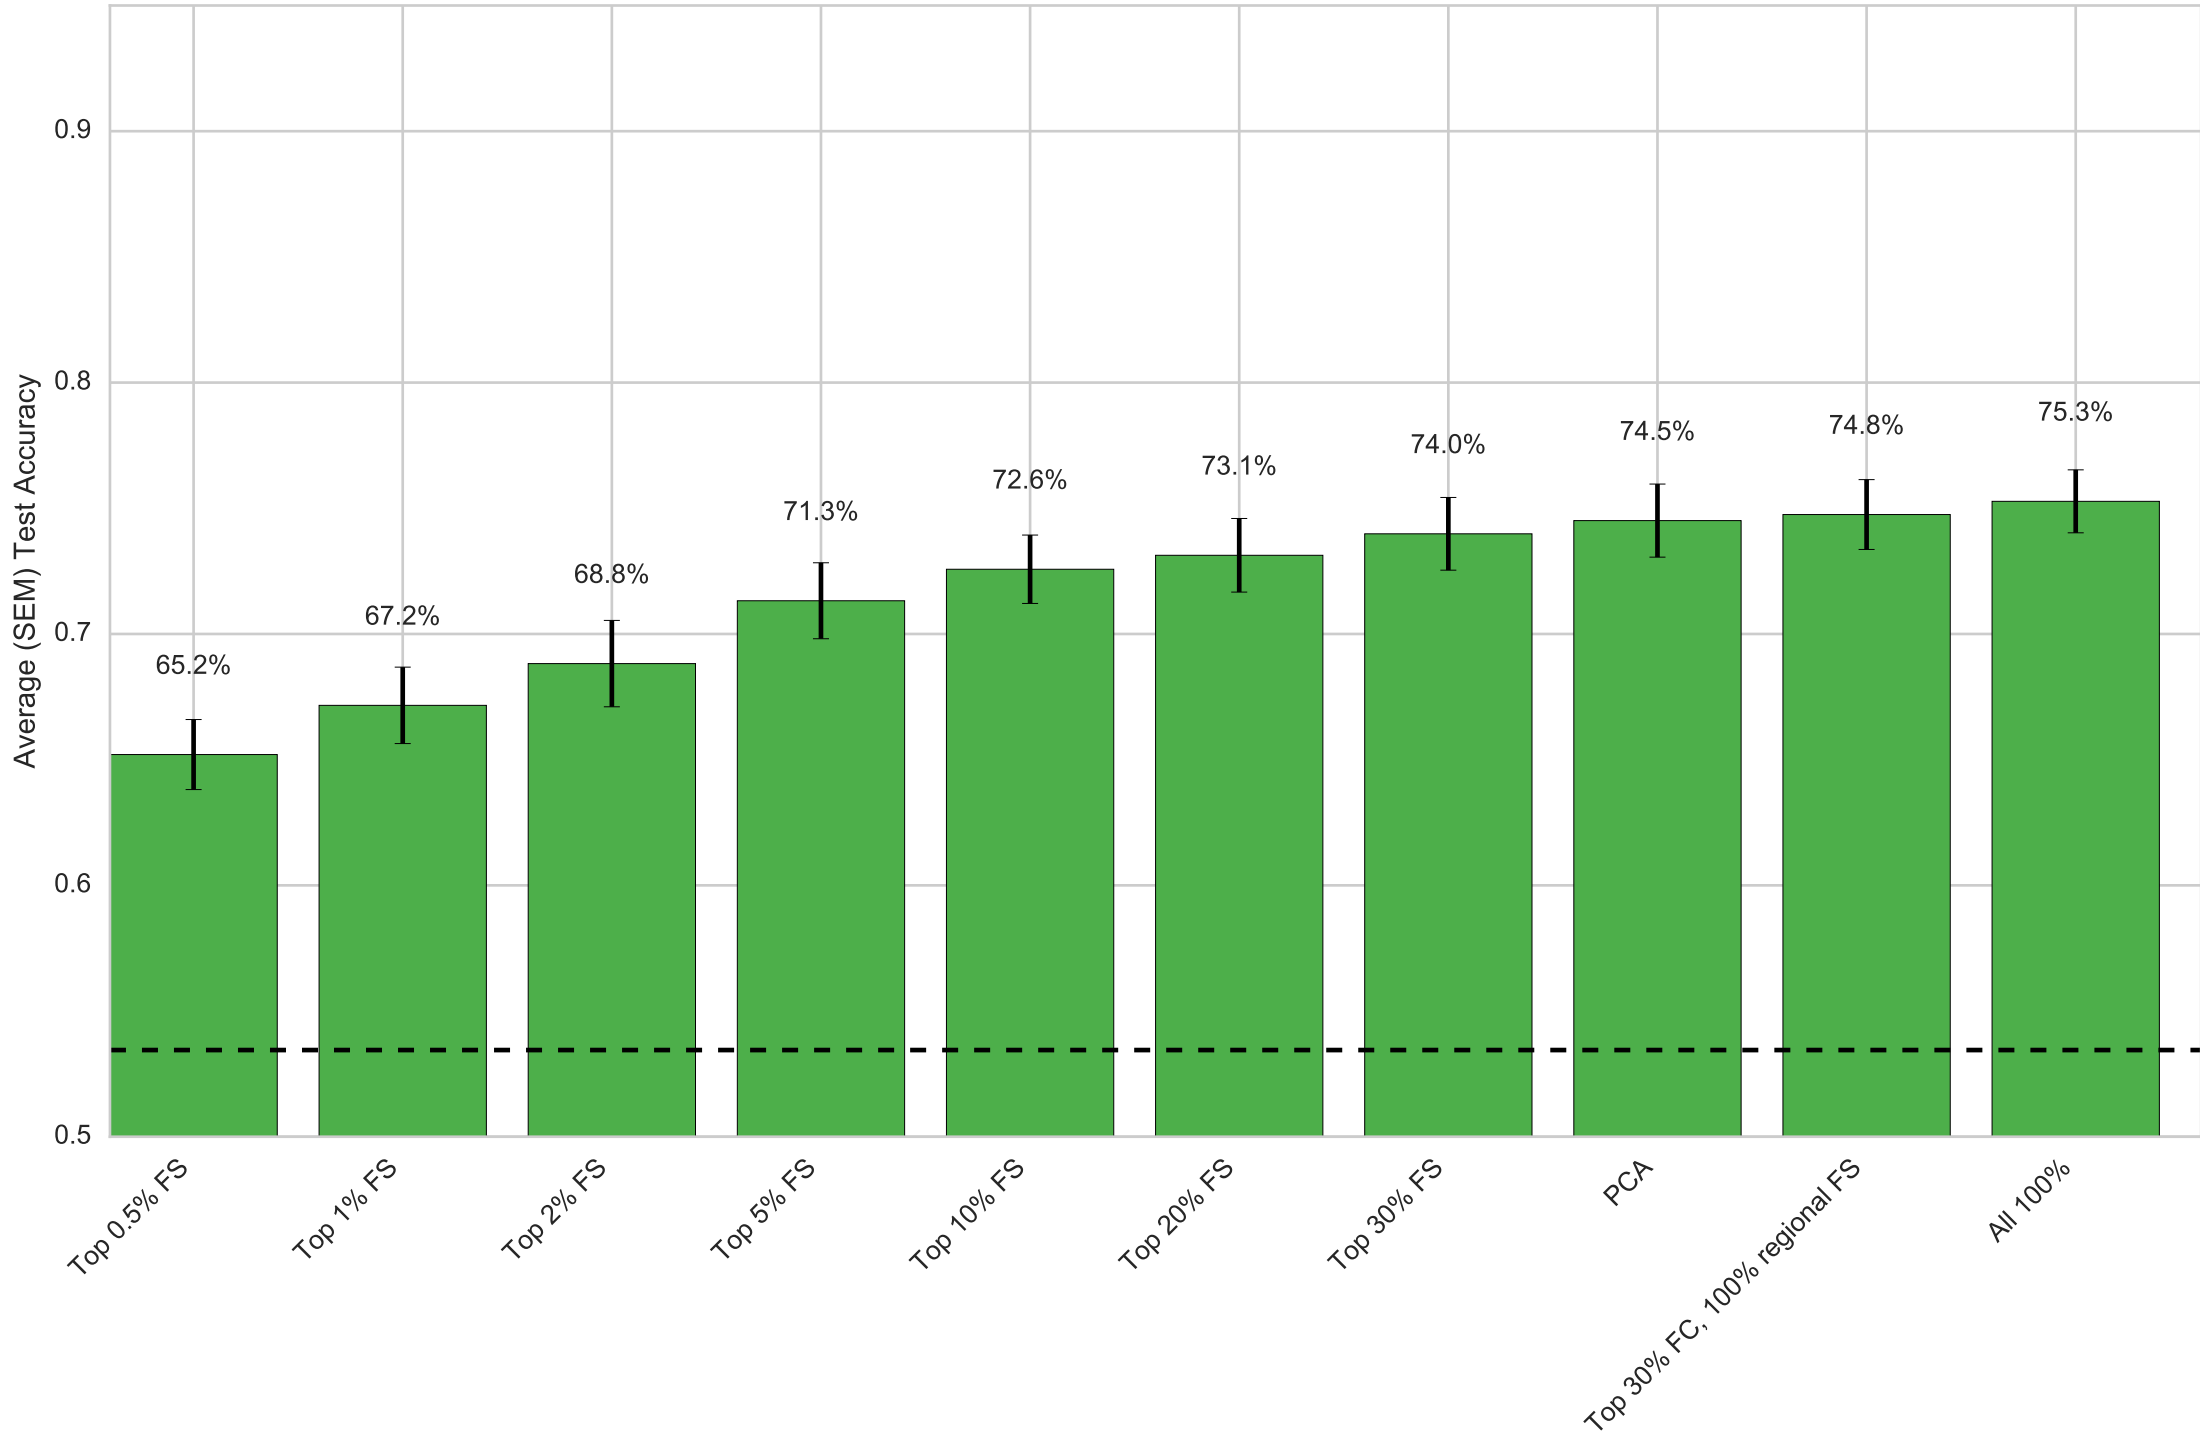

FC corr  
Comparison across various feature selection / reduction methods  
10 fold cross-validation - 5 shuffled iterations

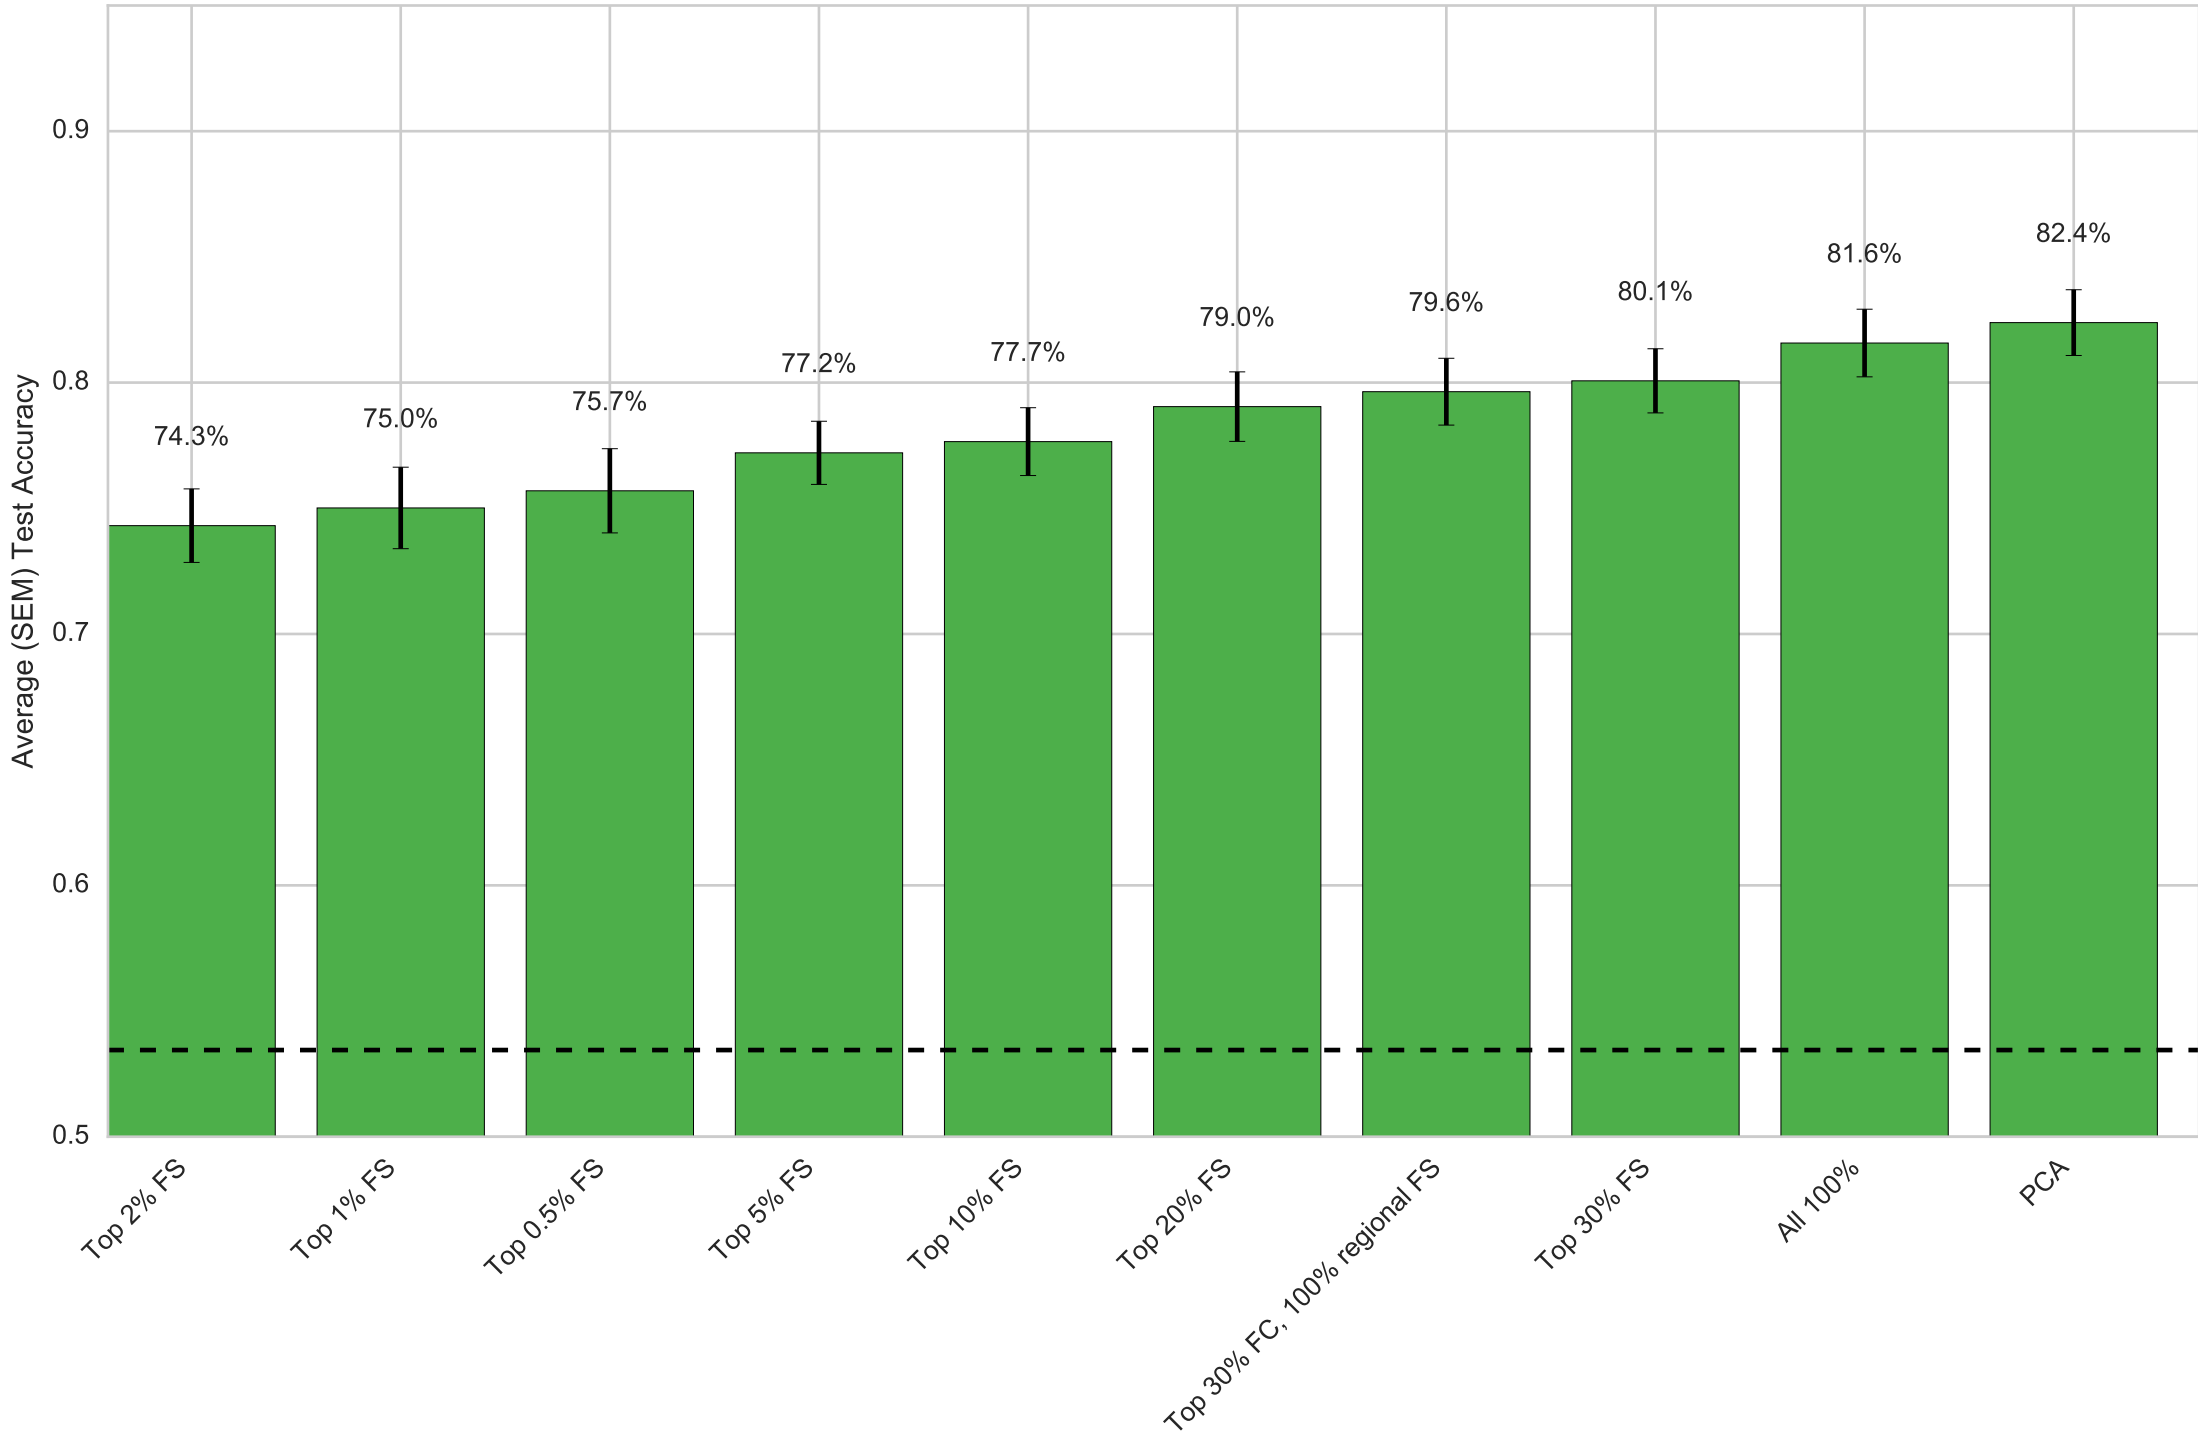

FC part  
Comparison across various feature selection / reduction methods  
10 fold cross-validation - 5 shuffled iterations

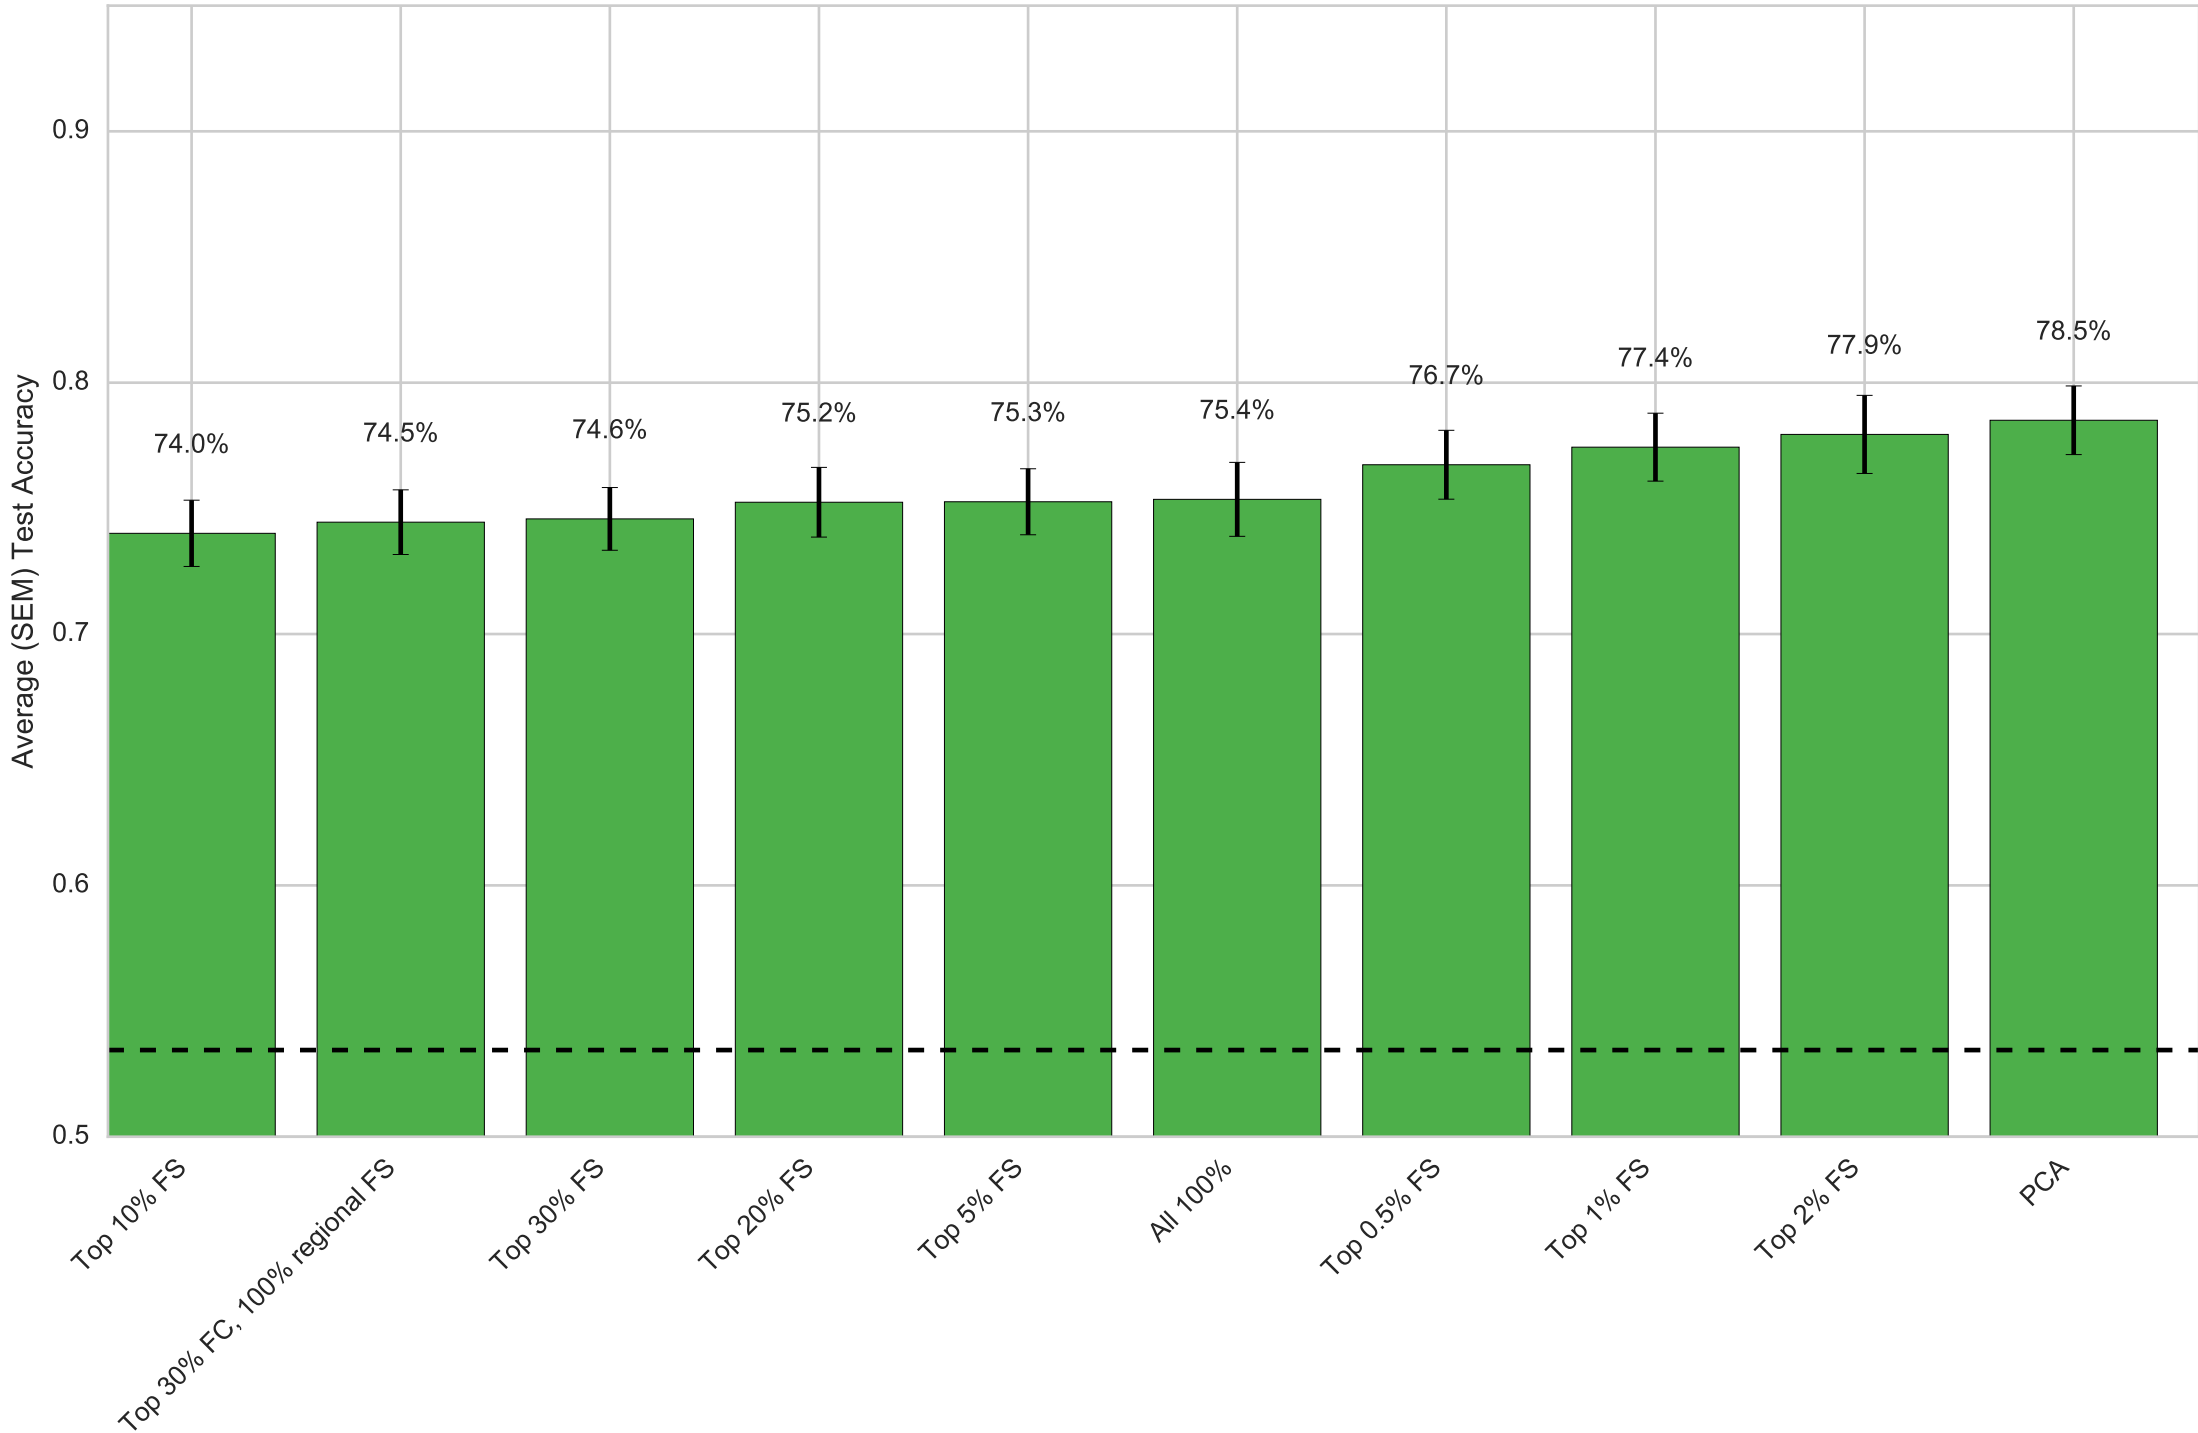

multi  
Comparison across various feature selection / reduction methods  
10 fold cross-validation - 5 shuffled iterations

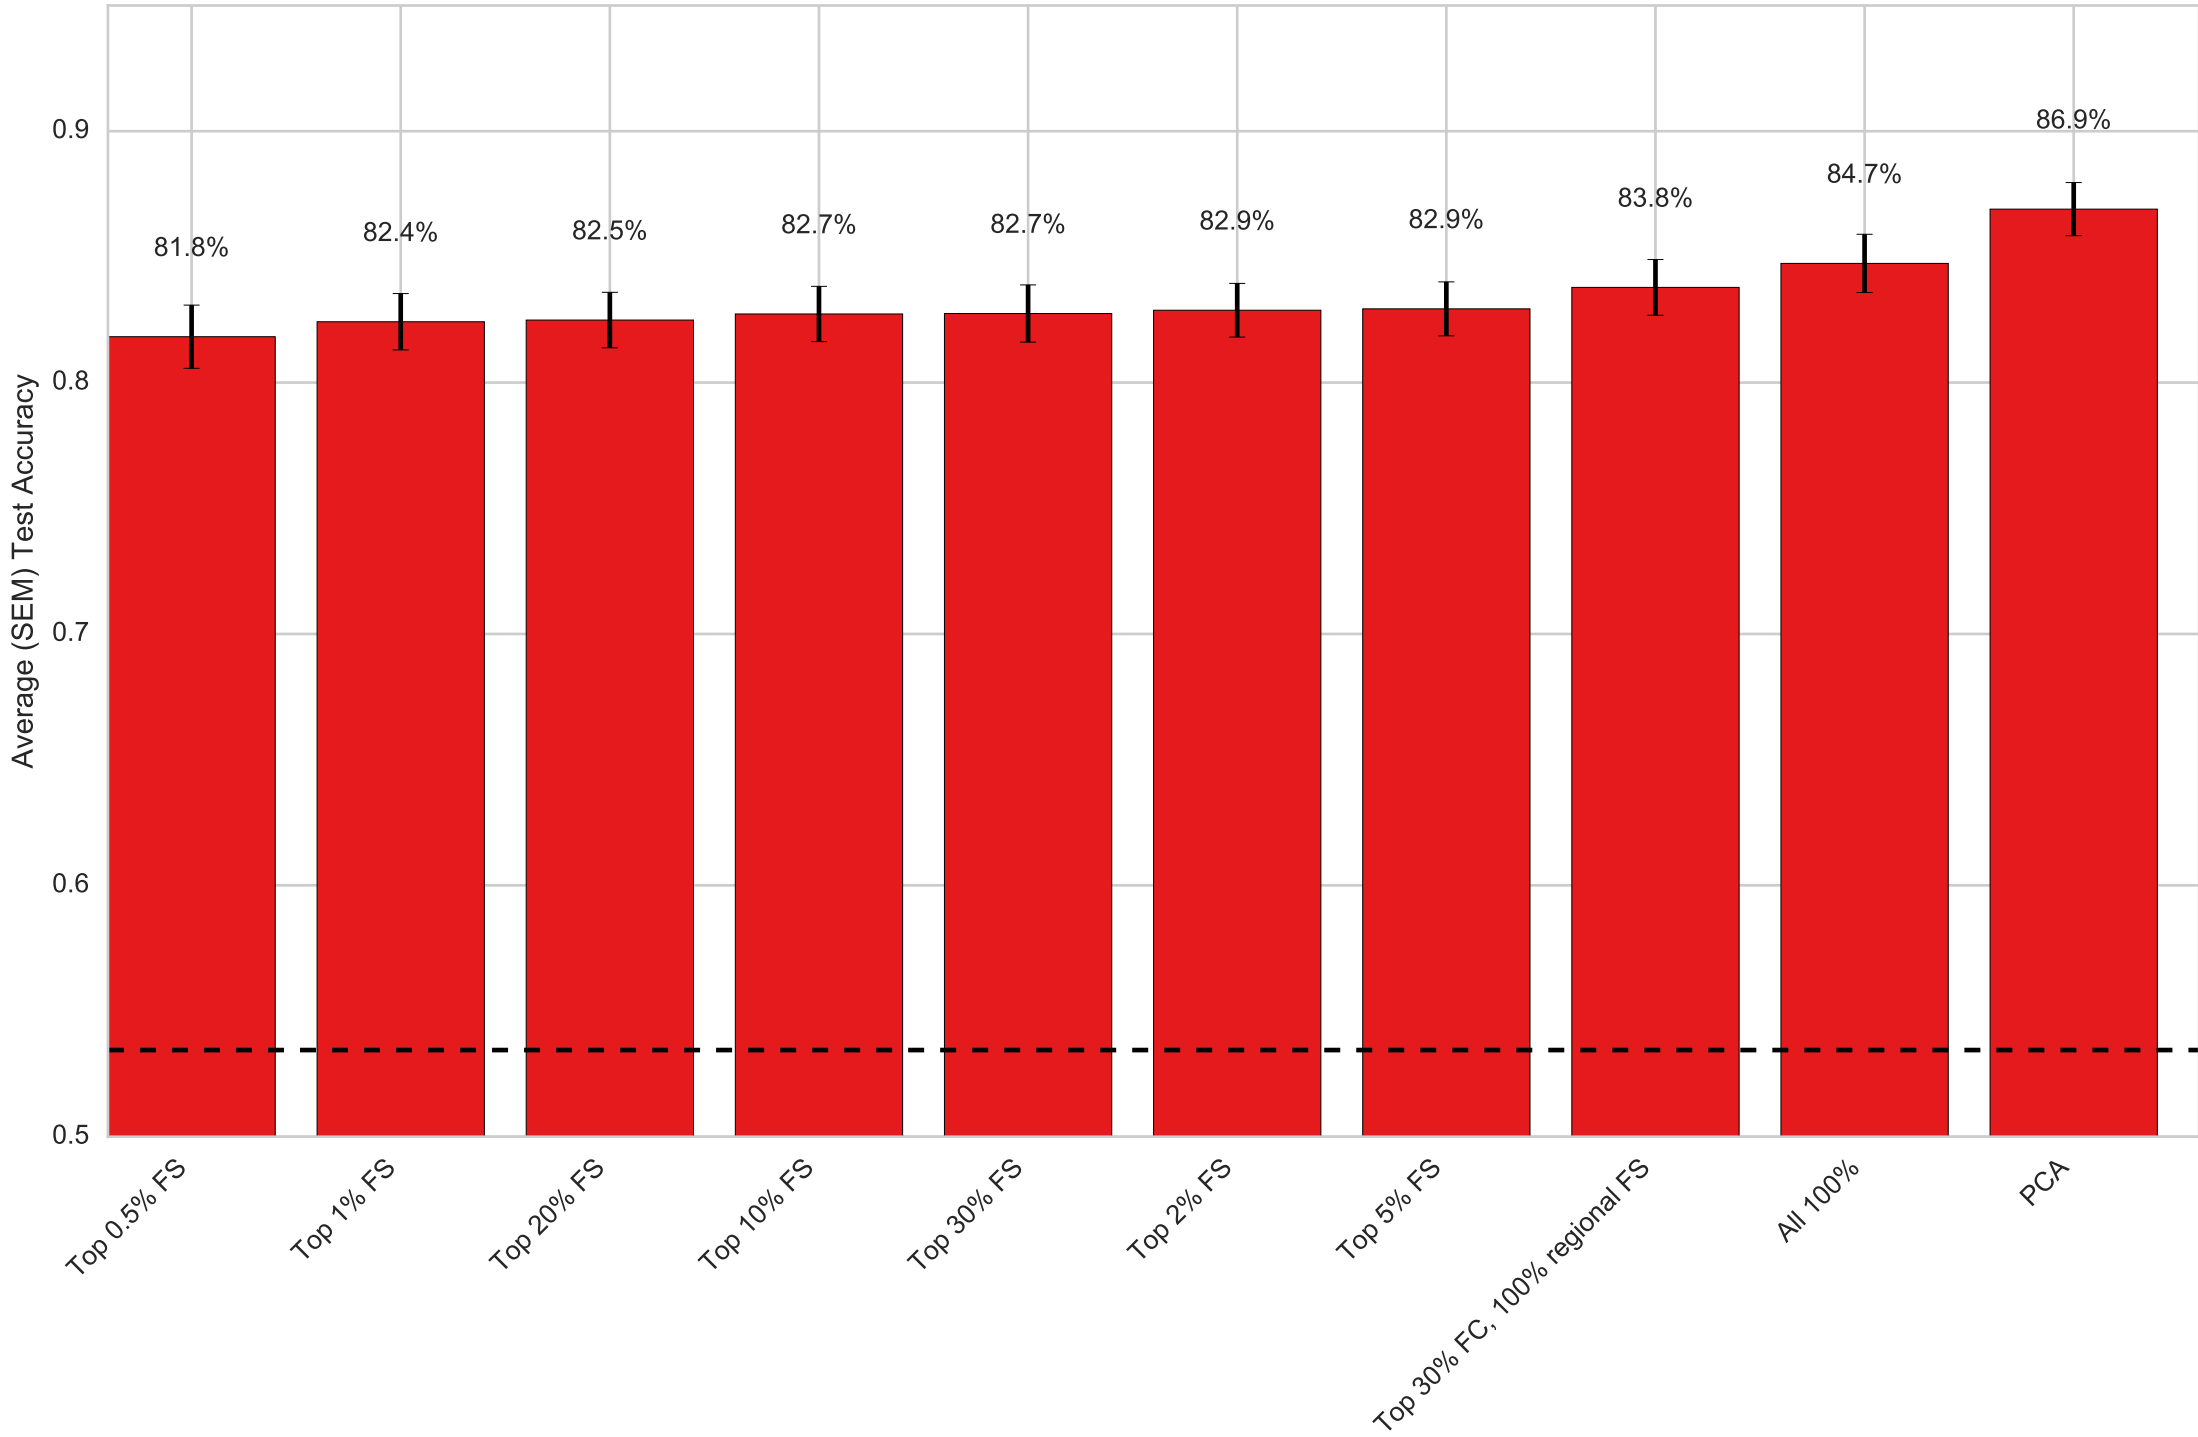

FC prec  
Comparison across various feature selection / reduction methods  
10 fold cross-validation - 5 shuffled iterations

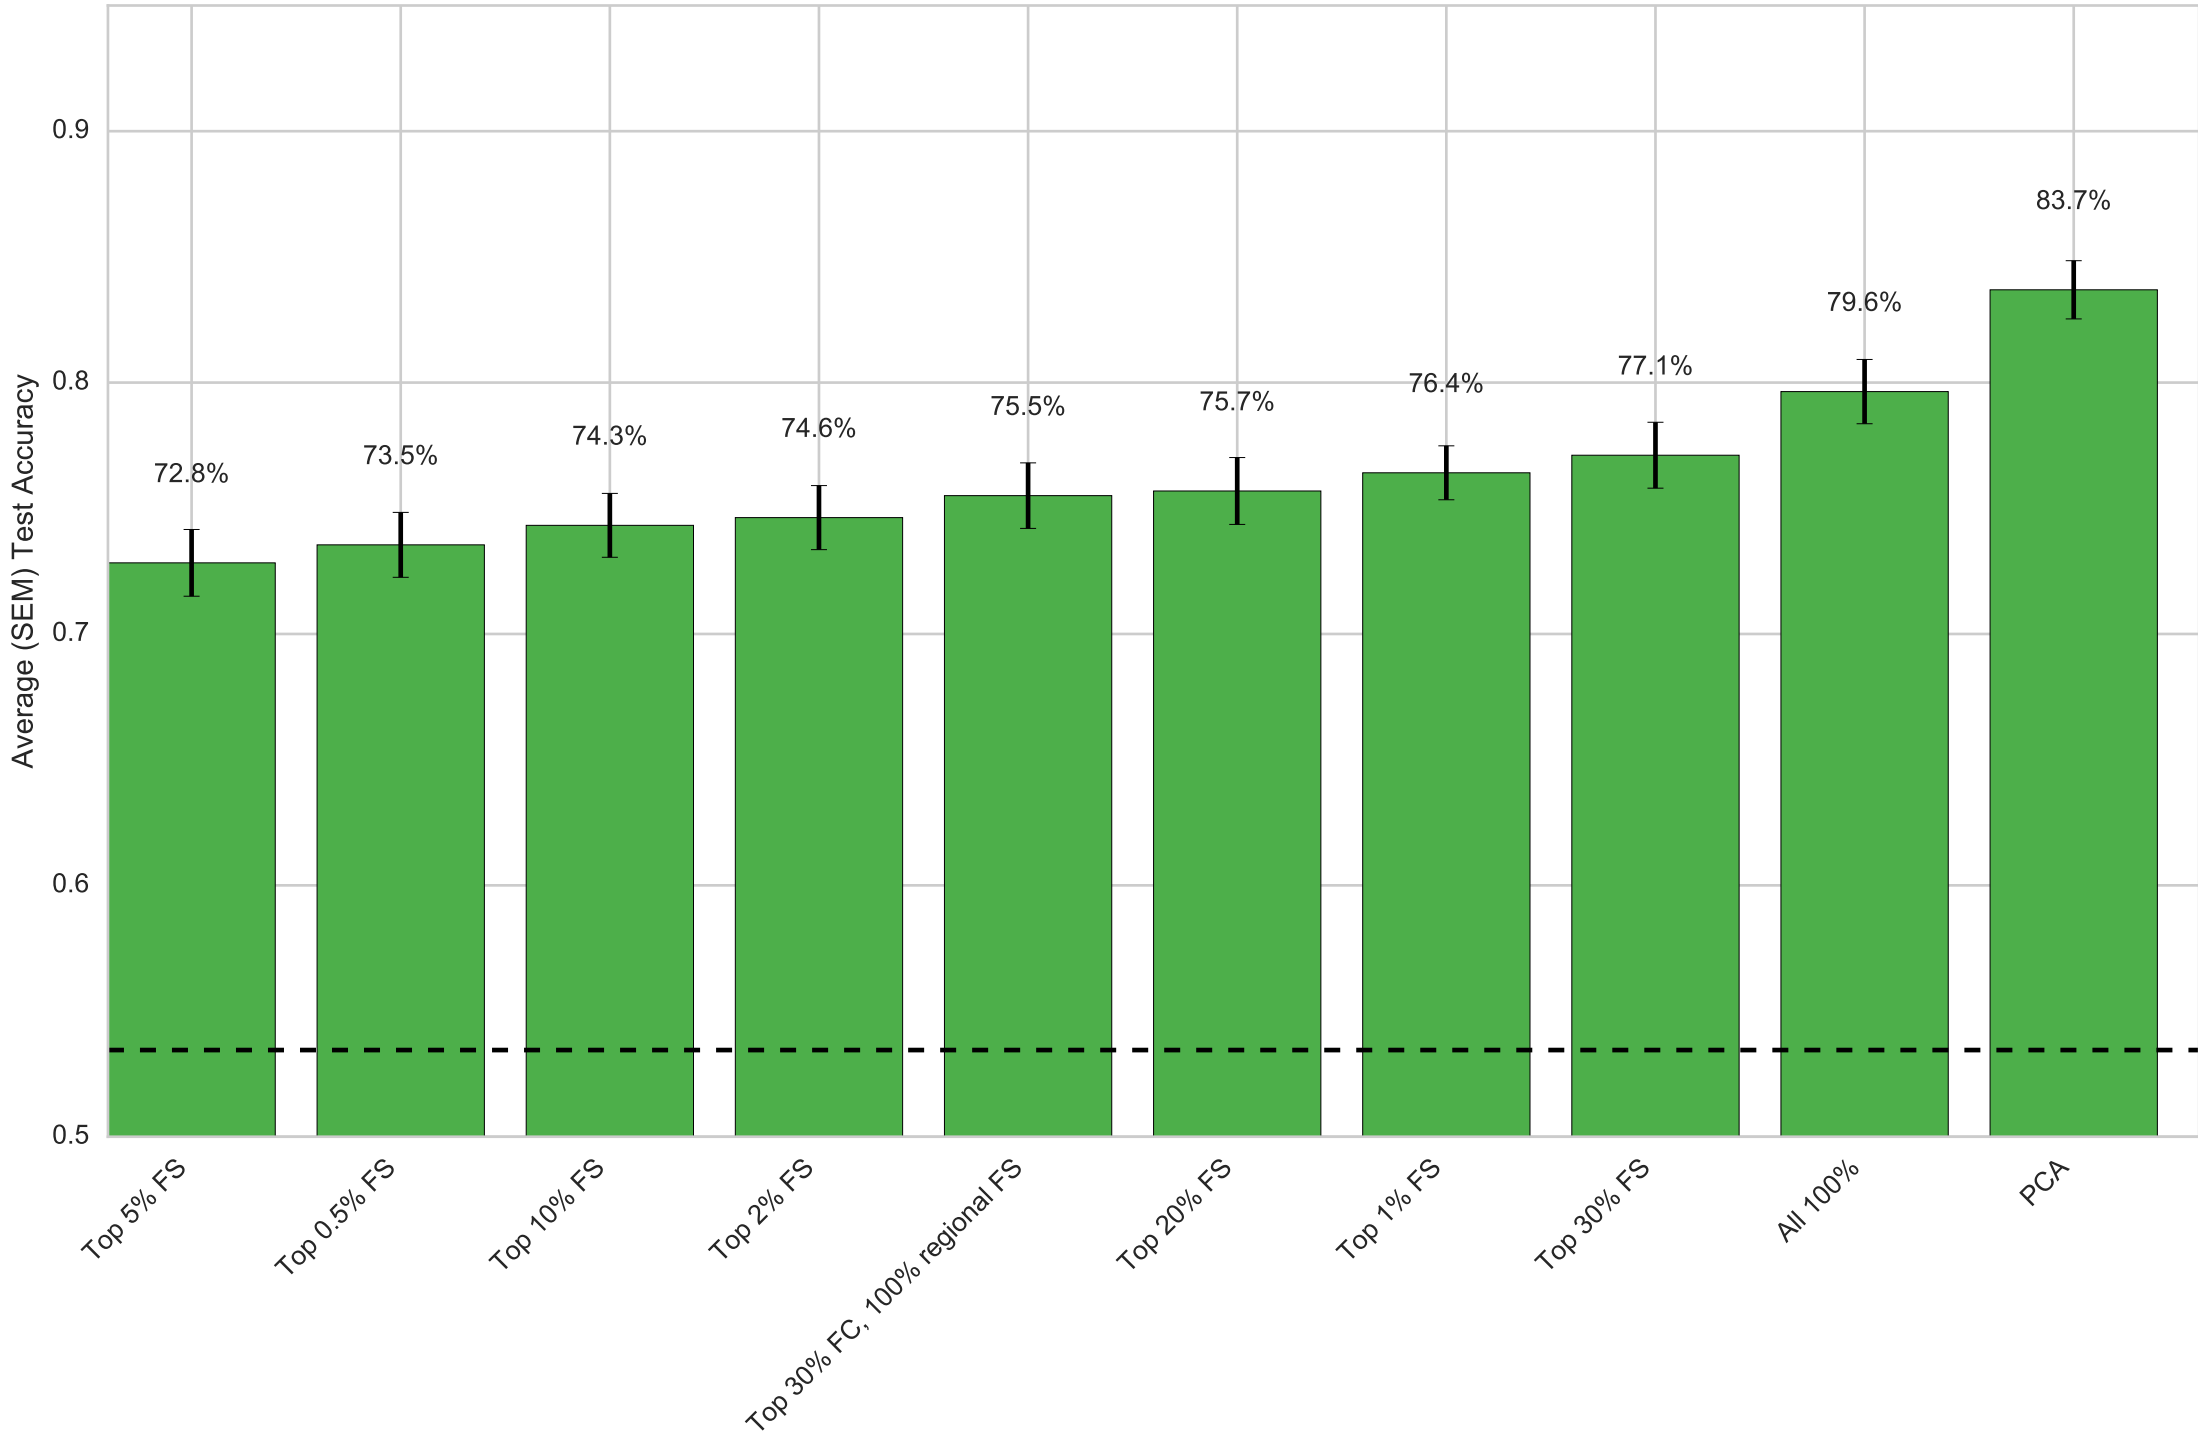



ReHo  
Comparison across various feature selection / reduction methods  
10 fold cross-validation - 5 shuffled iterations

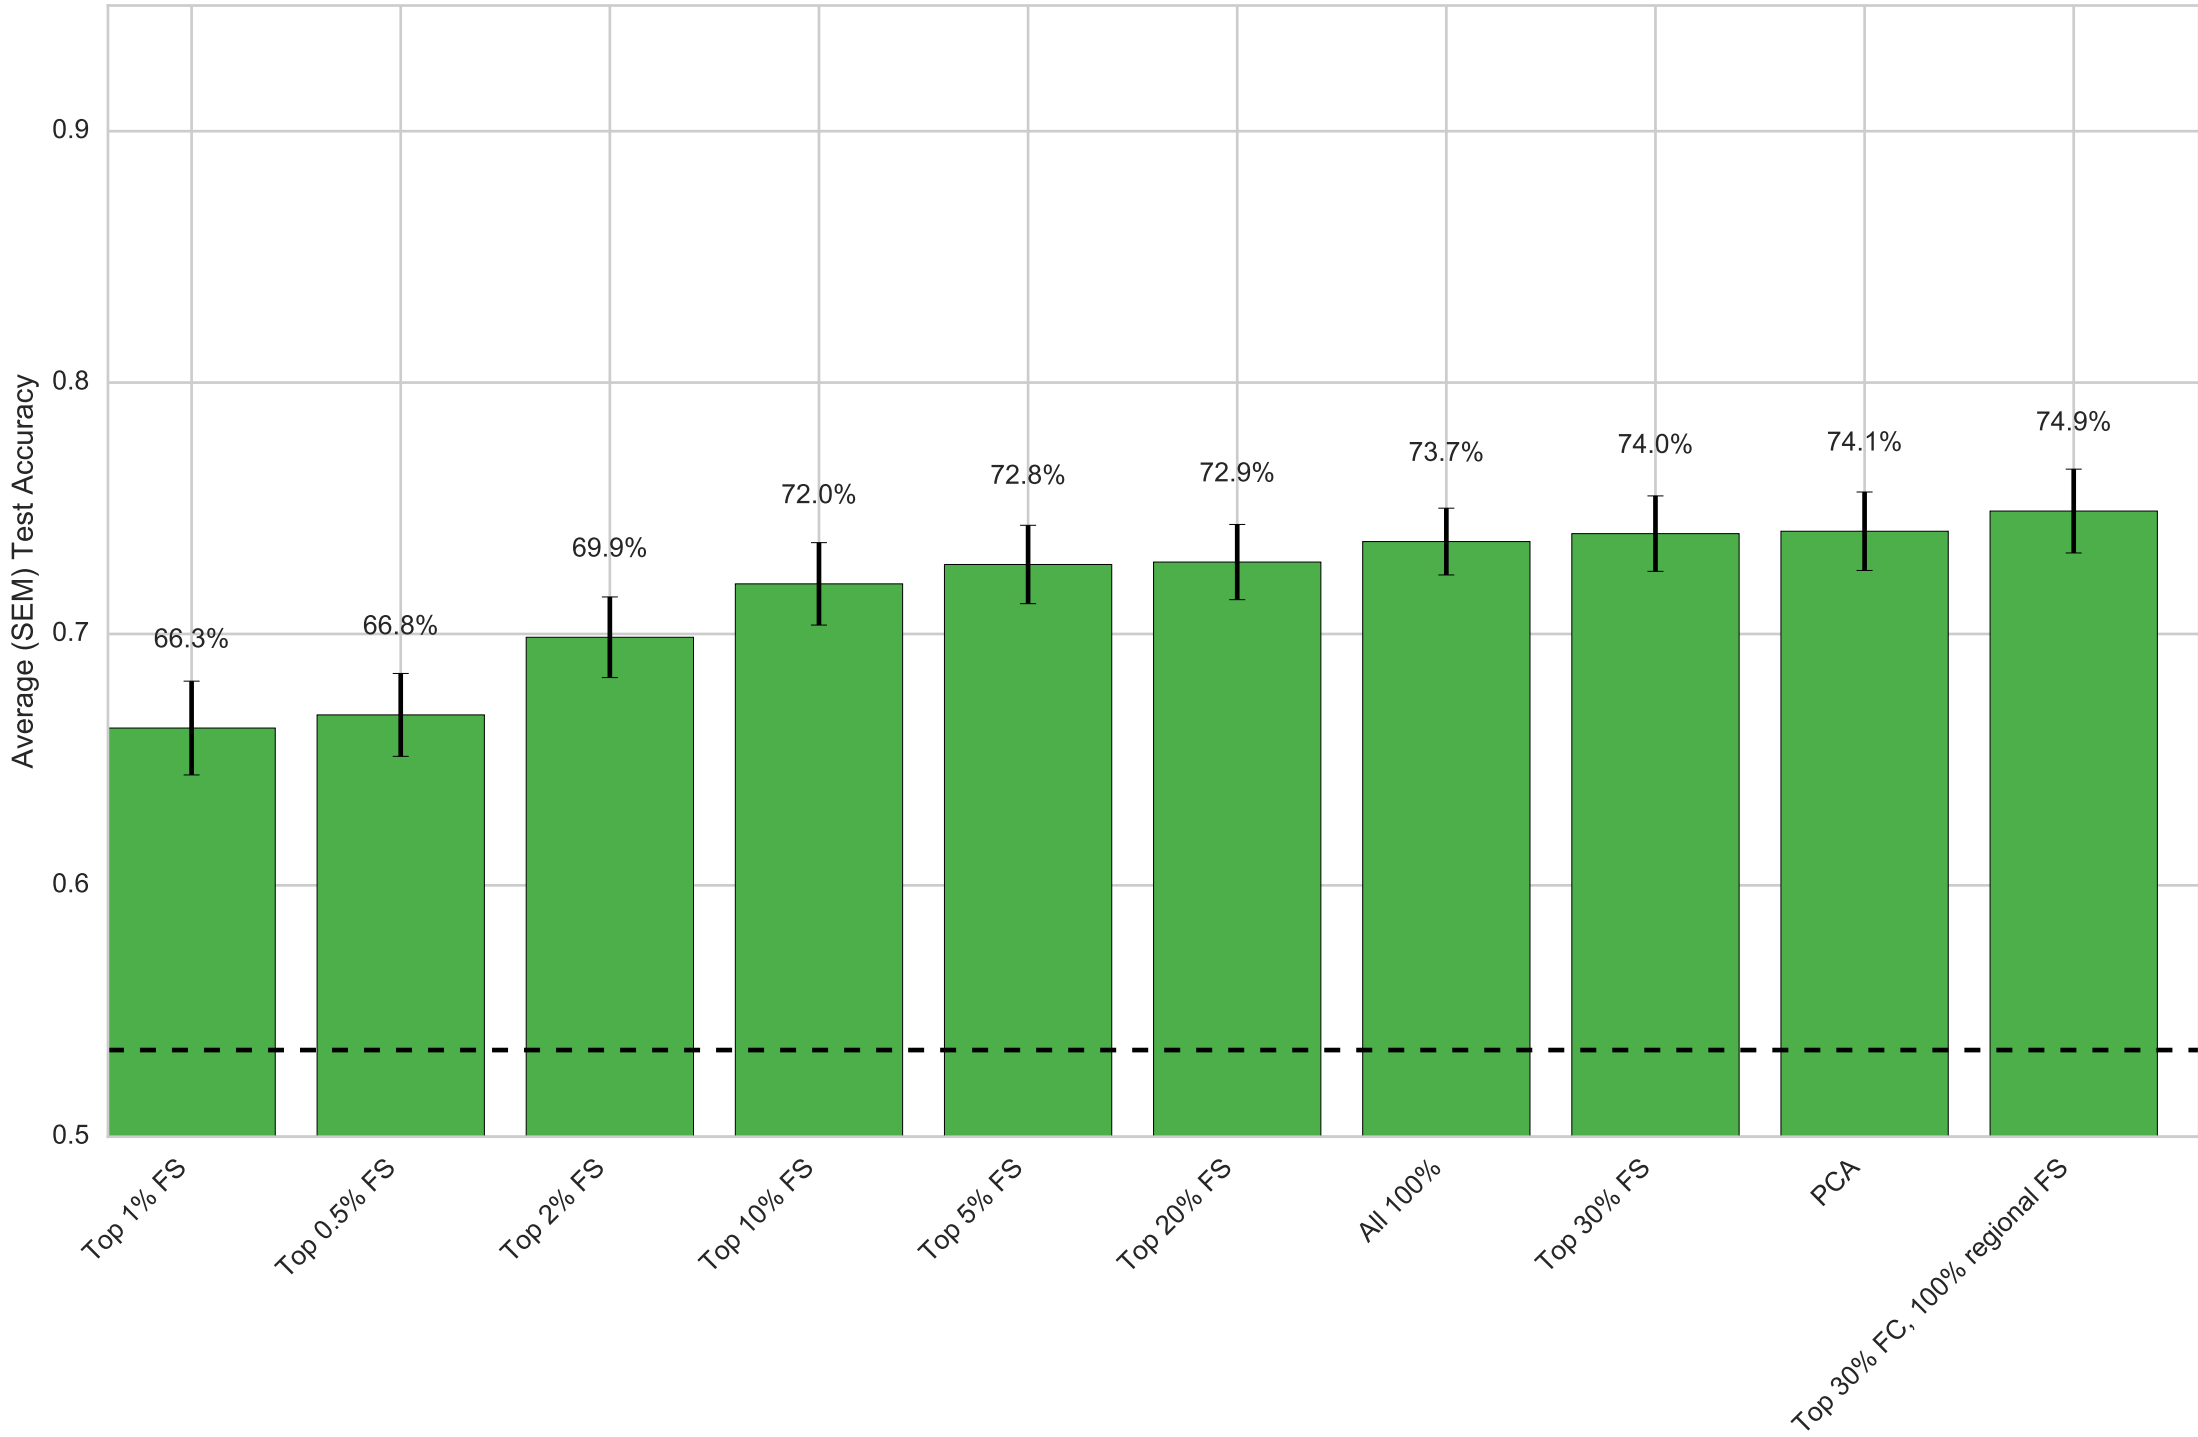

ALFF  
Comparison across various feature selection / reduction methods  
10 fold cross-validation - 5 shuffled iterations

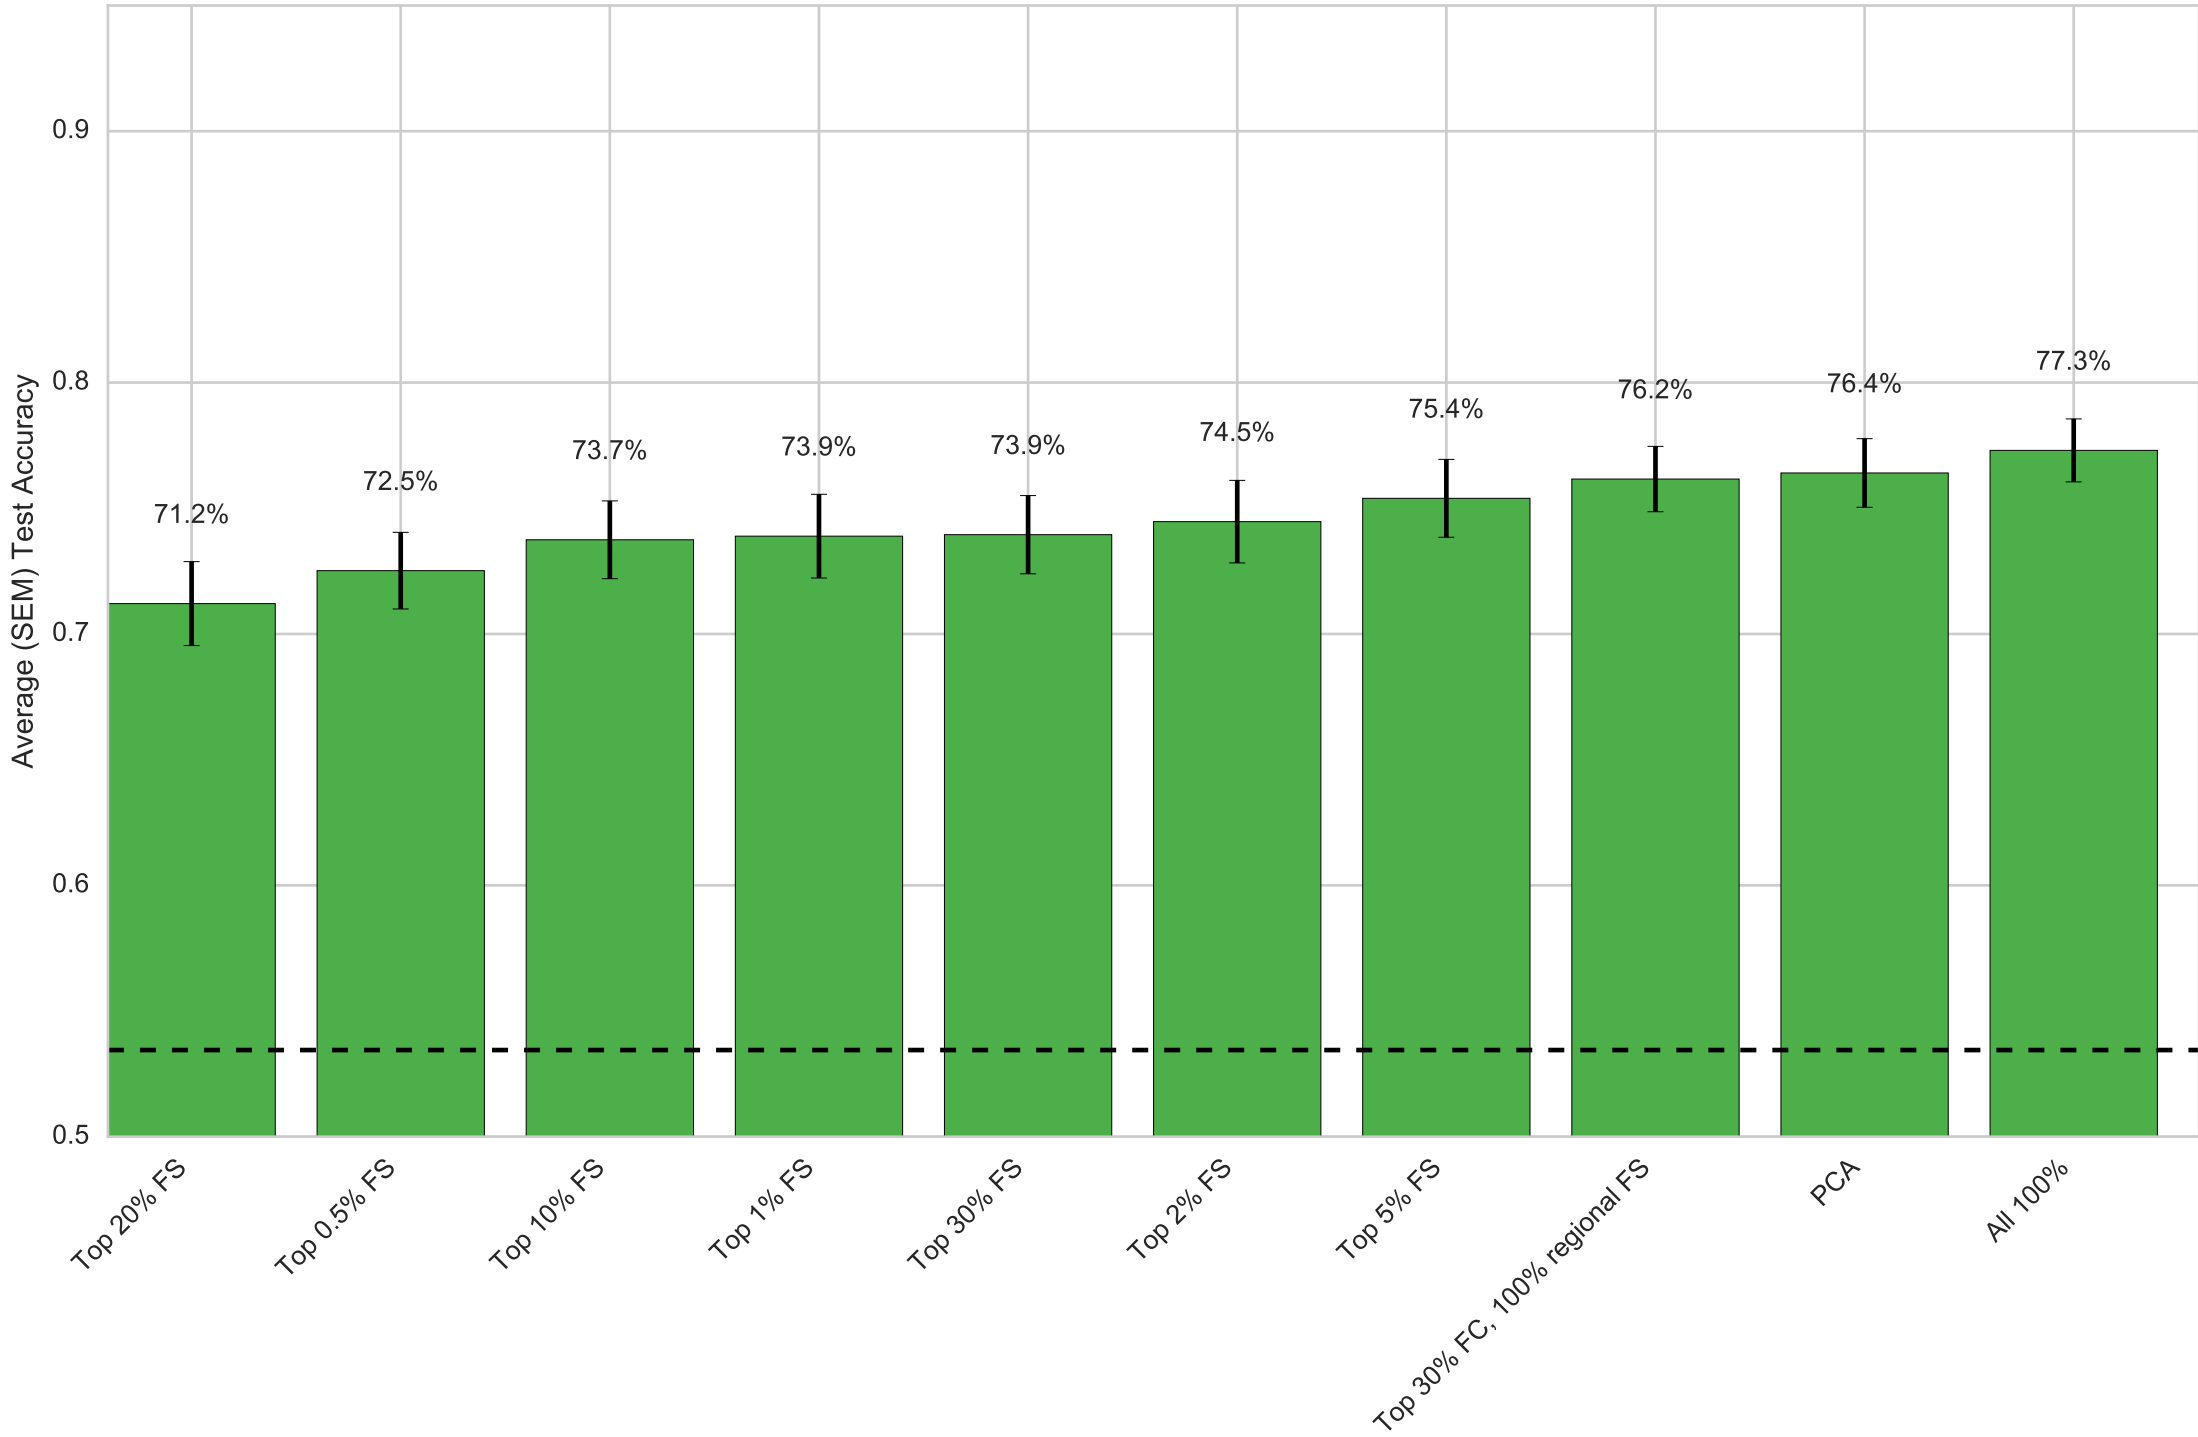

Comparison of prediction accuracy for stacked models of various feature types.  
Final ensemble model shown in red.

PCA - Dimensional Reduction  
Comparison across stacked predictions for various feature types  
10 fold cross-validation - 5 shuffled iterations

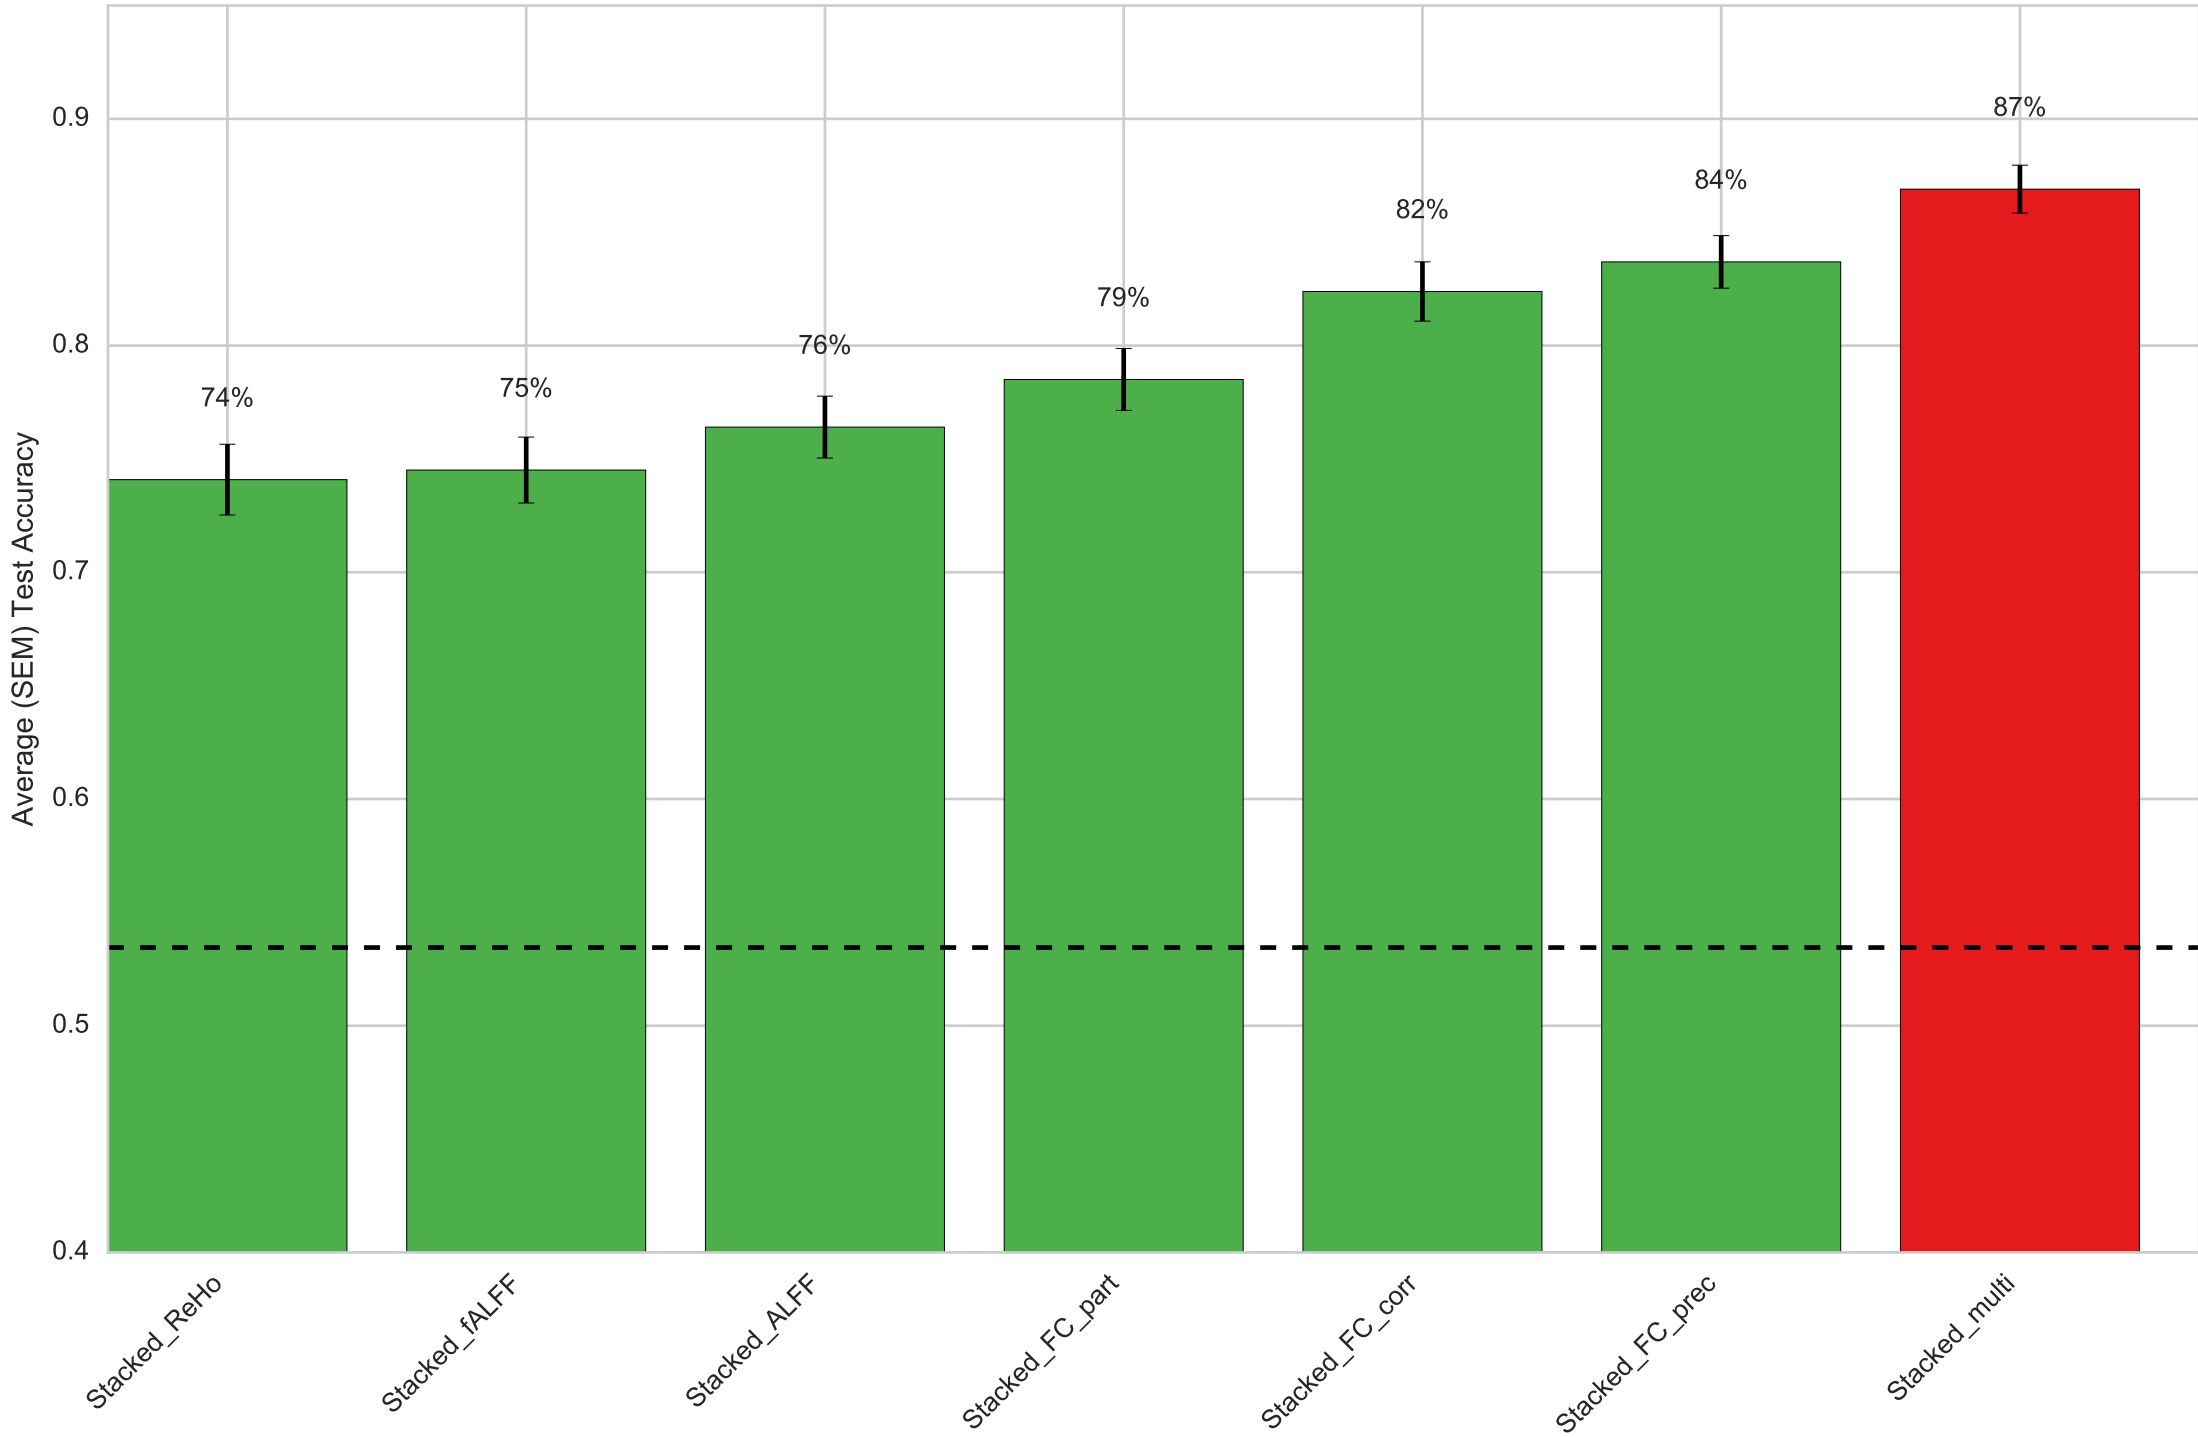

Top 2% Feature Selection  
Comparison across stacked predictions for various feature types  
10 fold cross-validation - 5 shuffled iterations

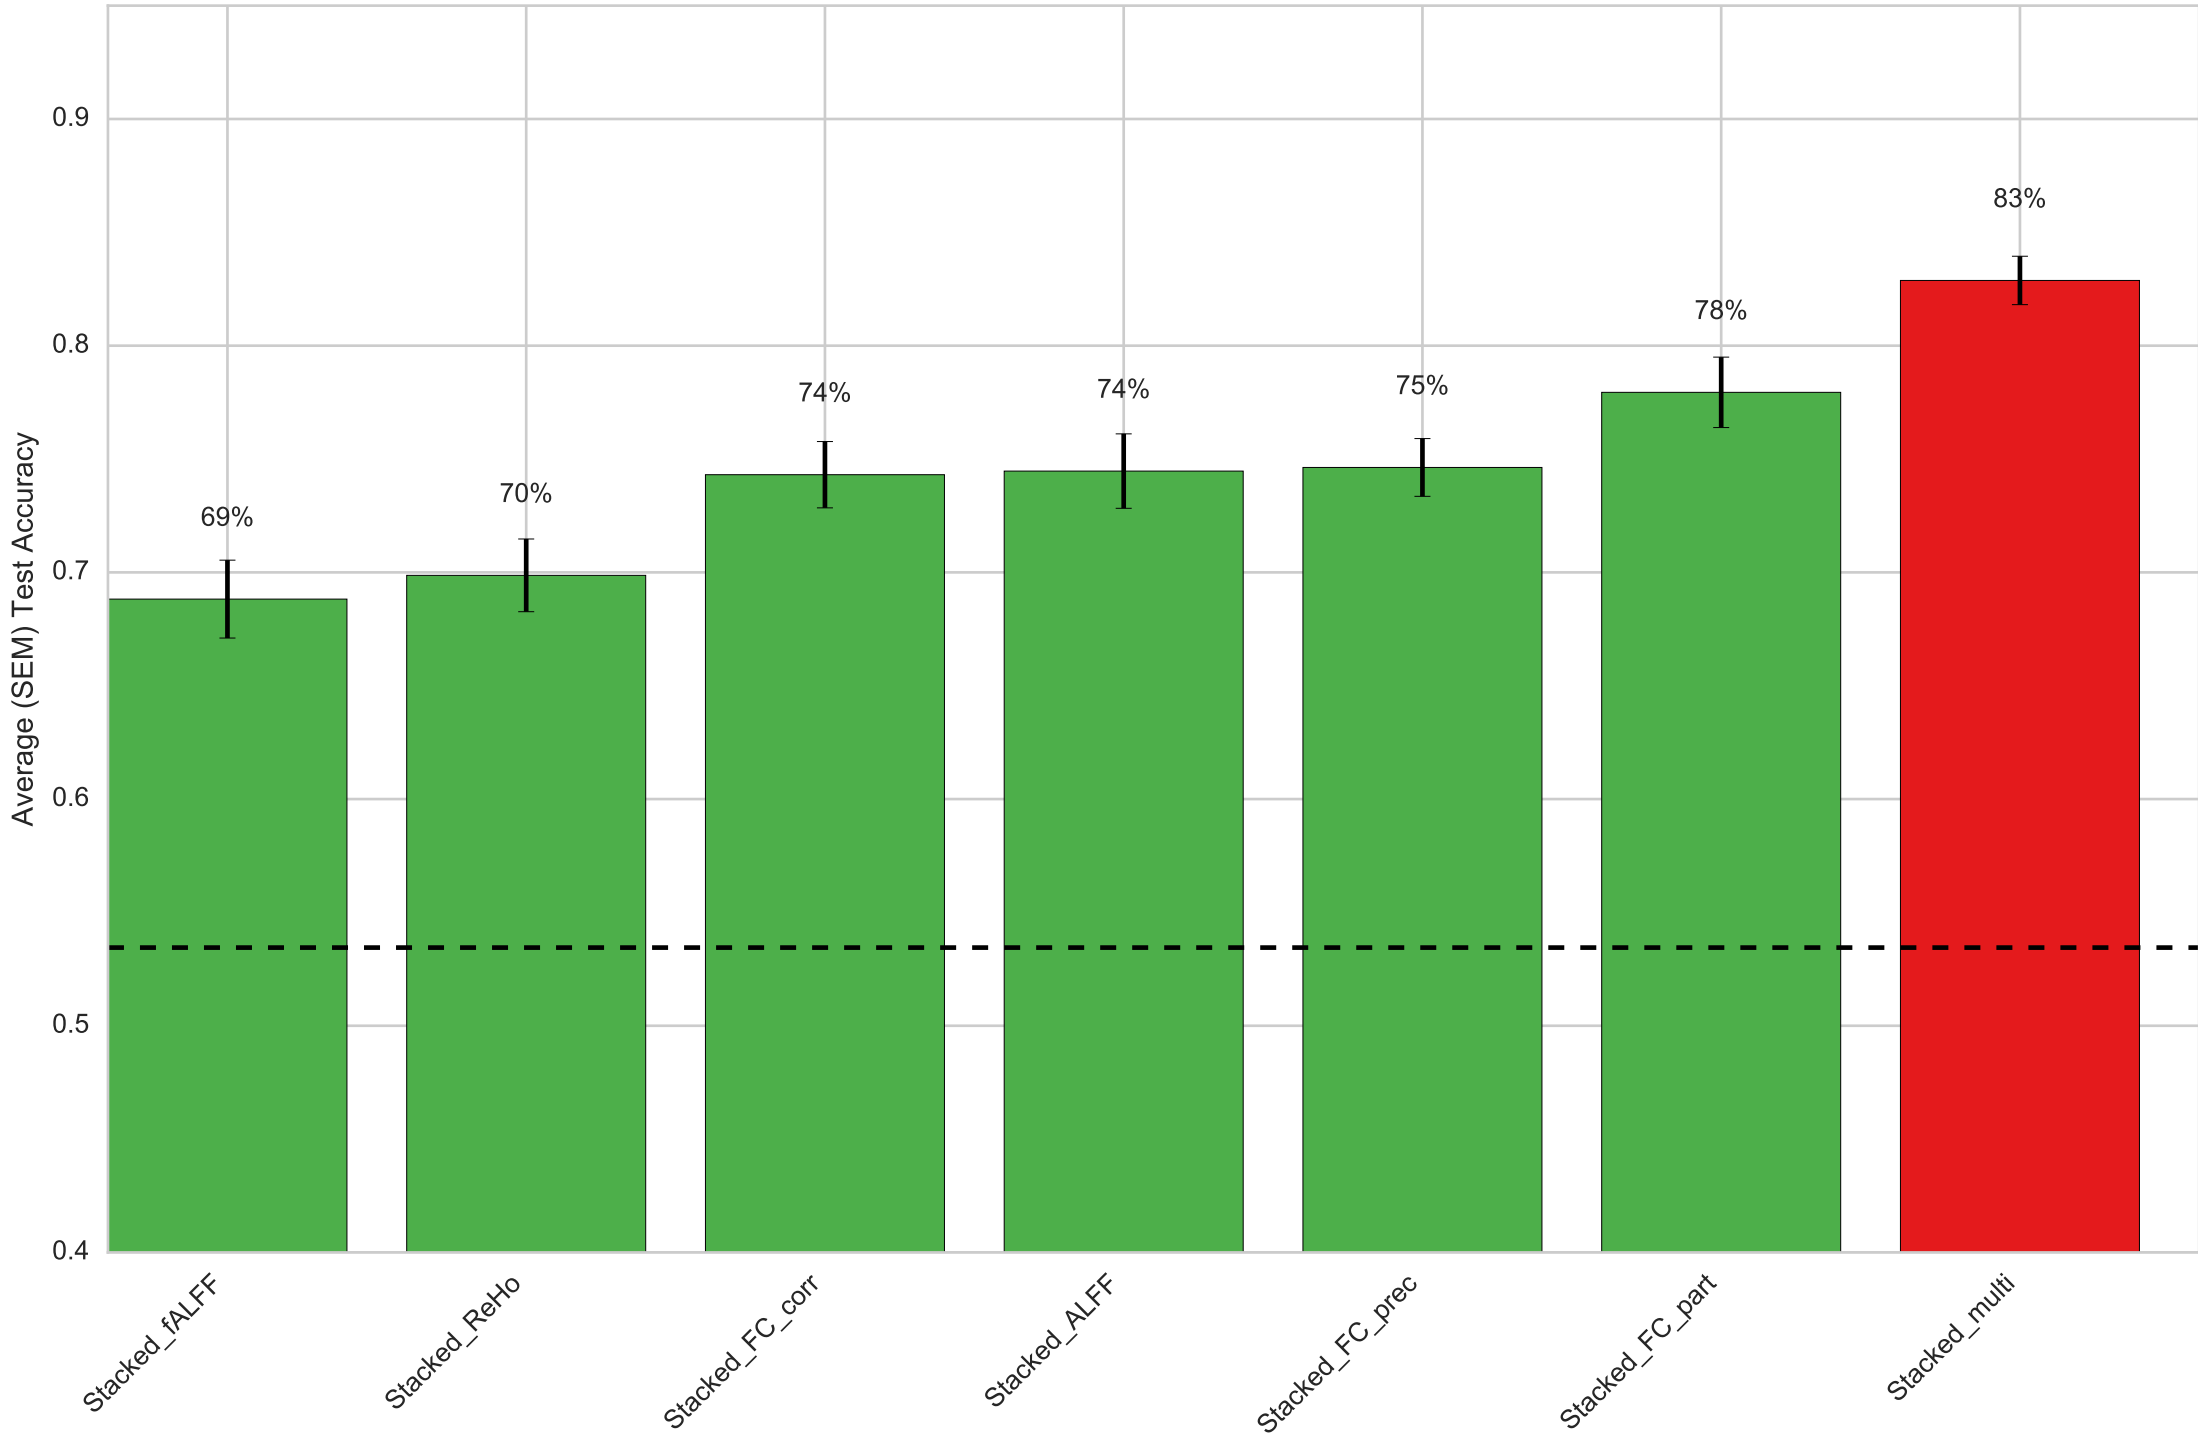

Top 5% Feature Selection  
Comparison across stacked predictions for various feature types  
10 fold cross-validation - 5 shuffled iterations

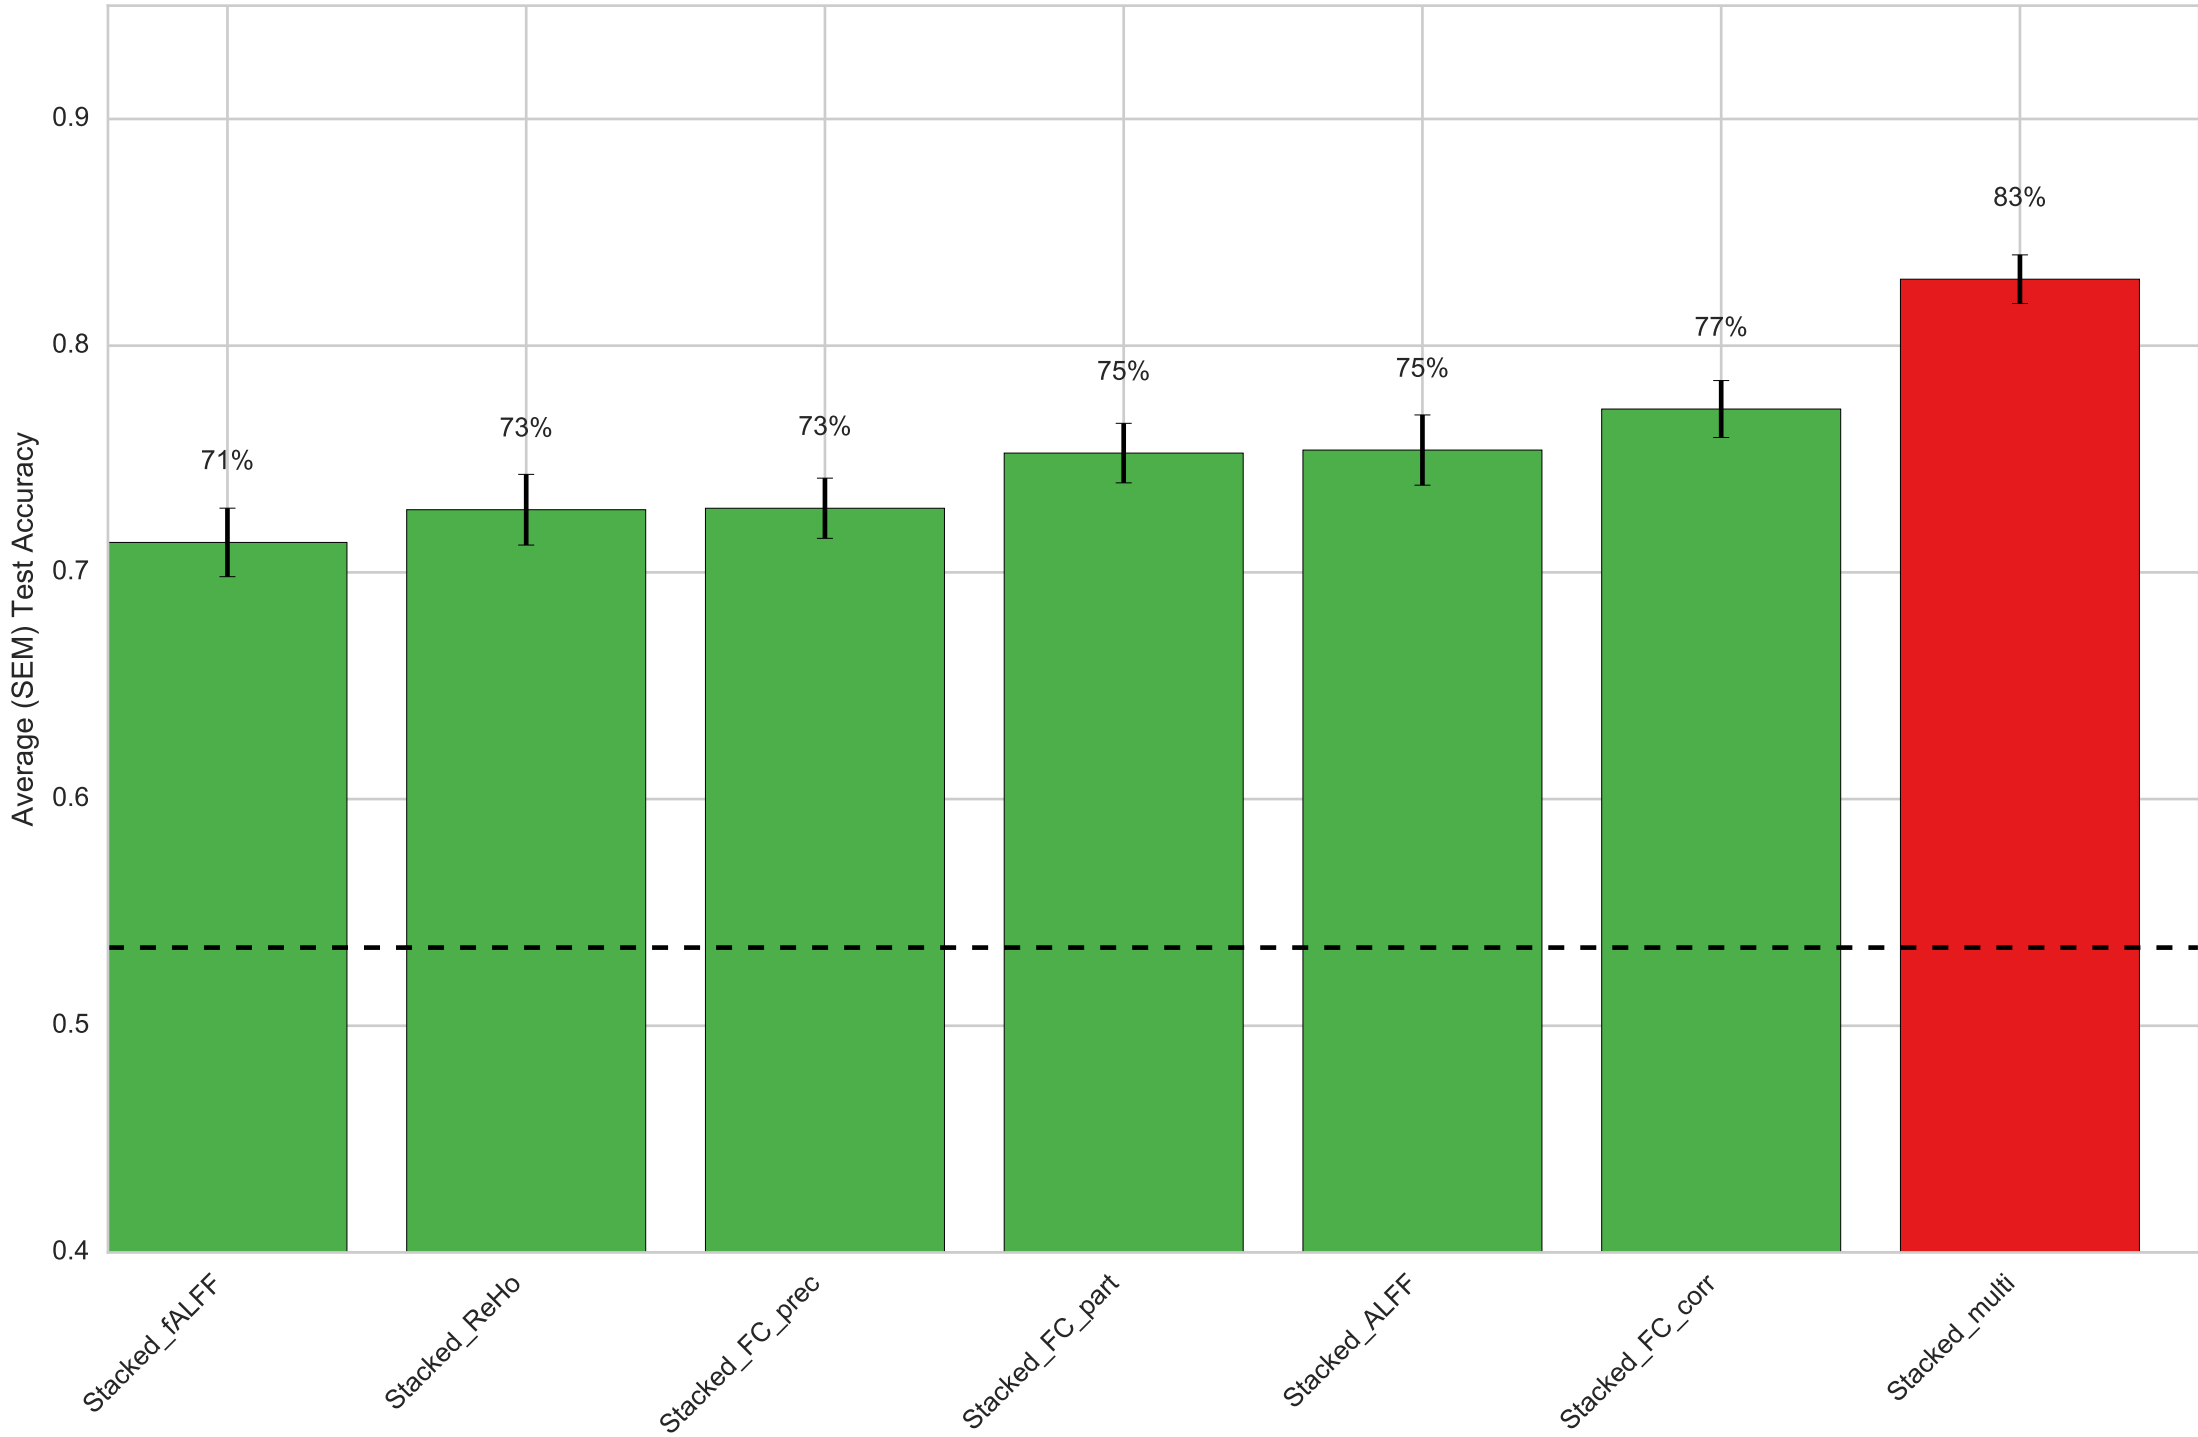

Top 10% Feature Selection  
Comparison across stacked predictions for various feature types  
10 fold cross-validation - 5 shuffled iterations

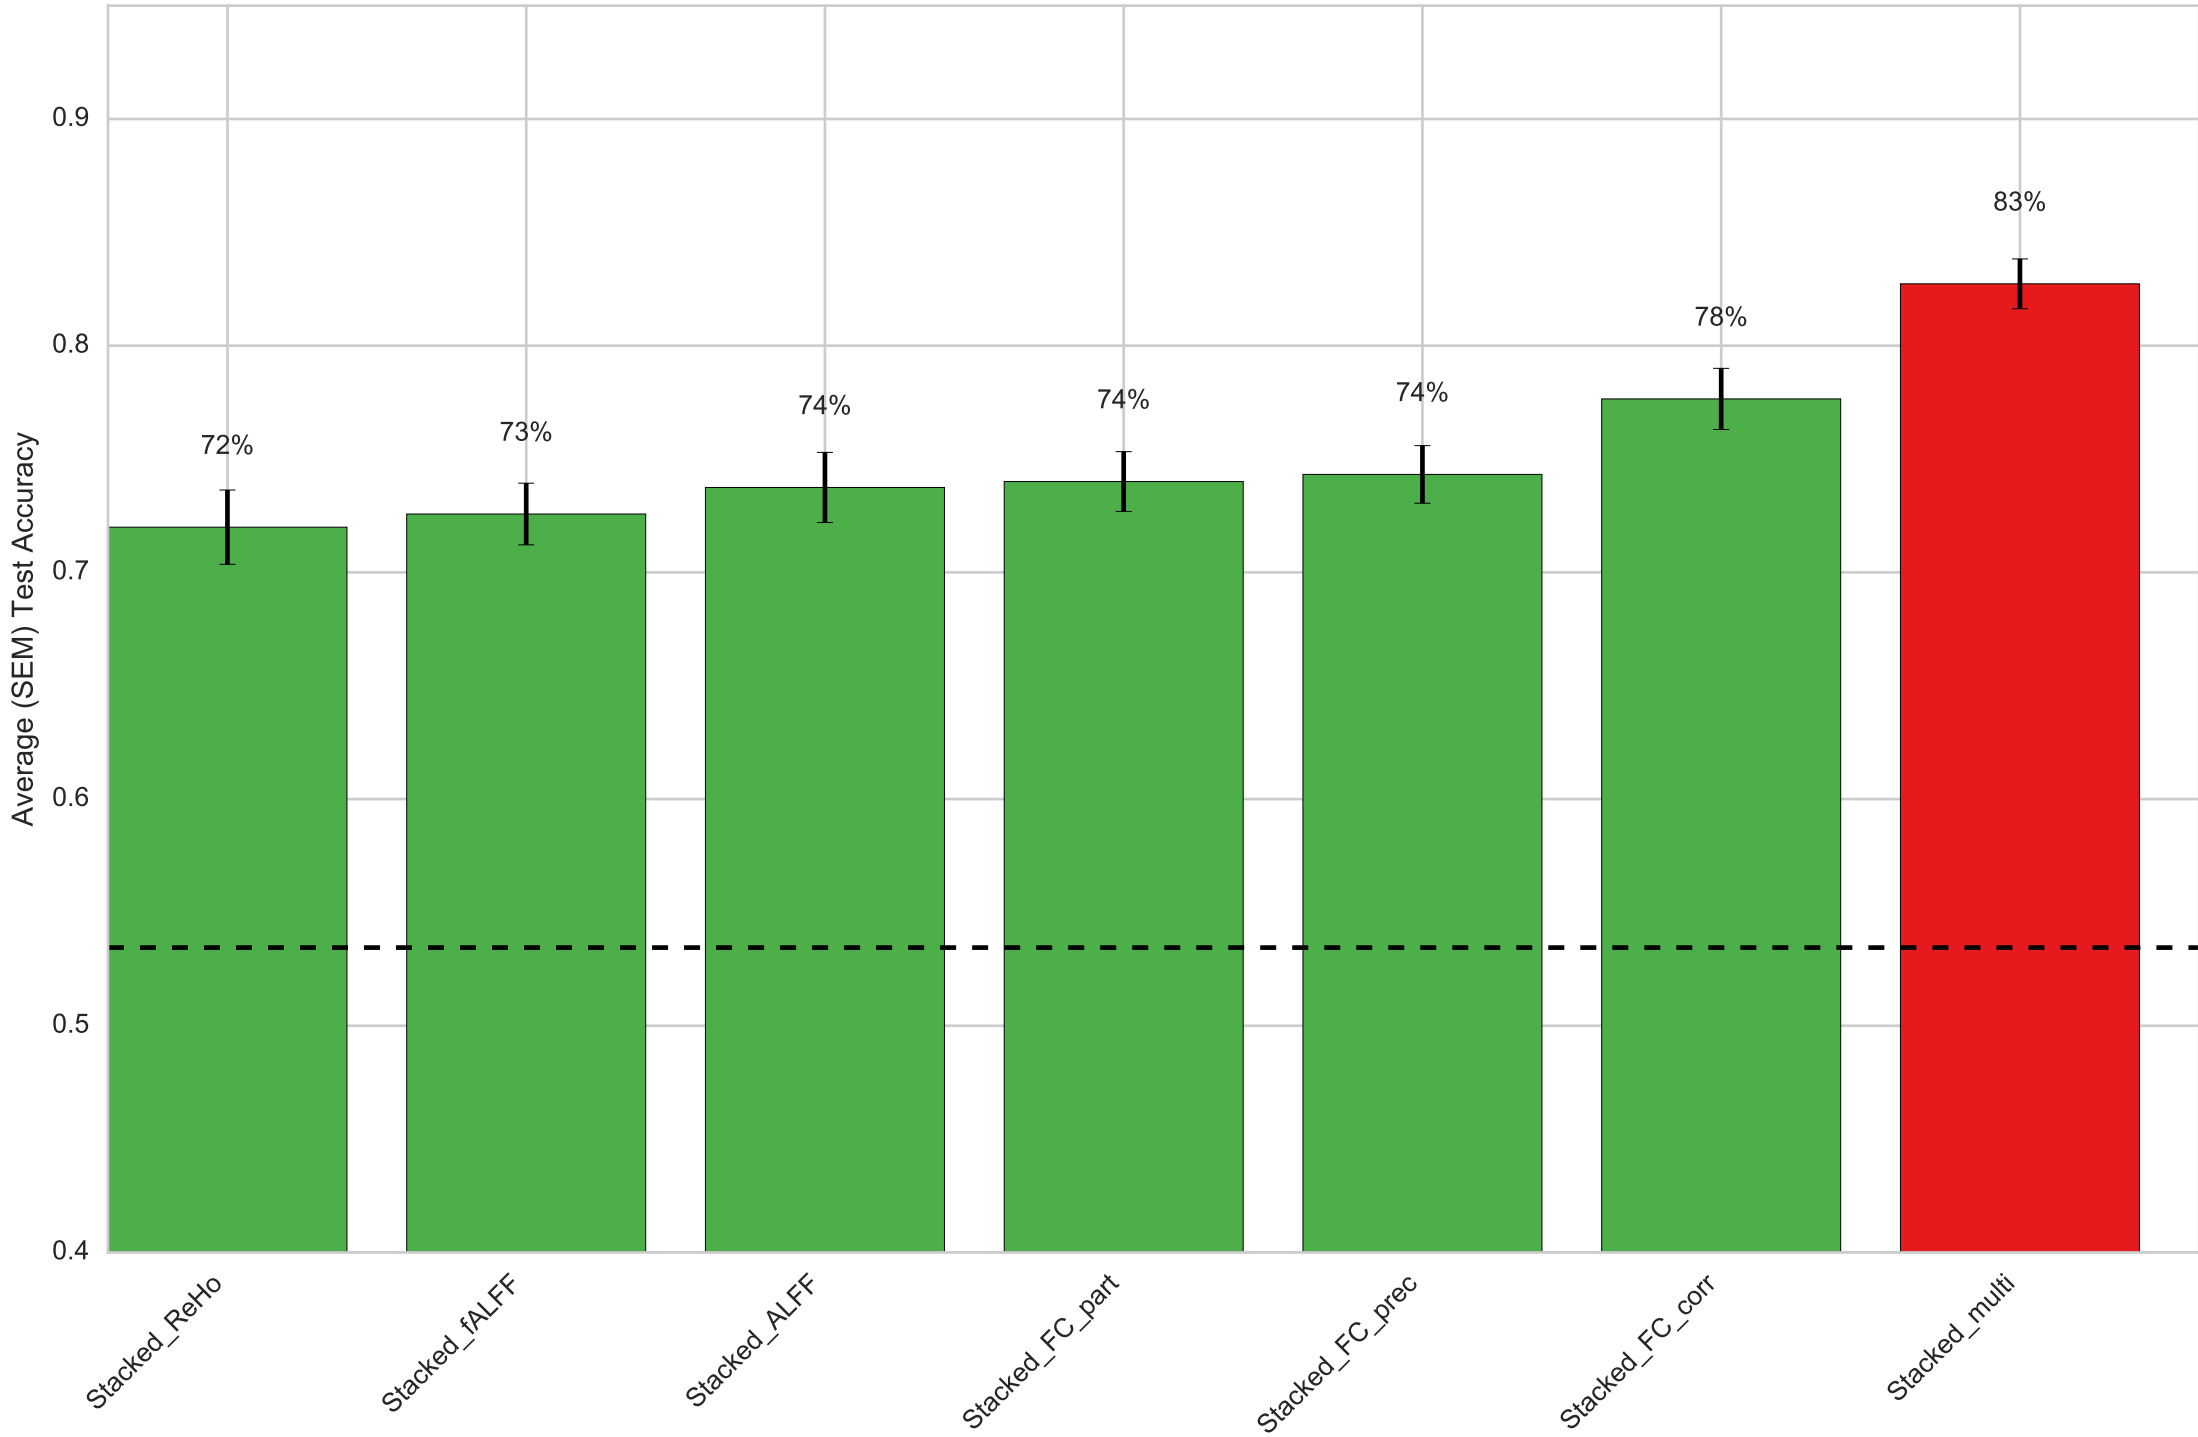

Top 0.5% Feature Selection  
Comparison across stacked predictions for various feature types  
10 fold cross-validation - 5 shuffled iterations

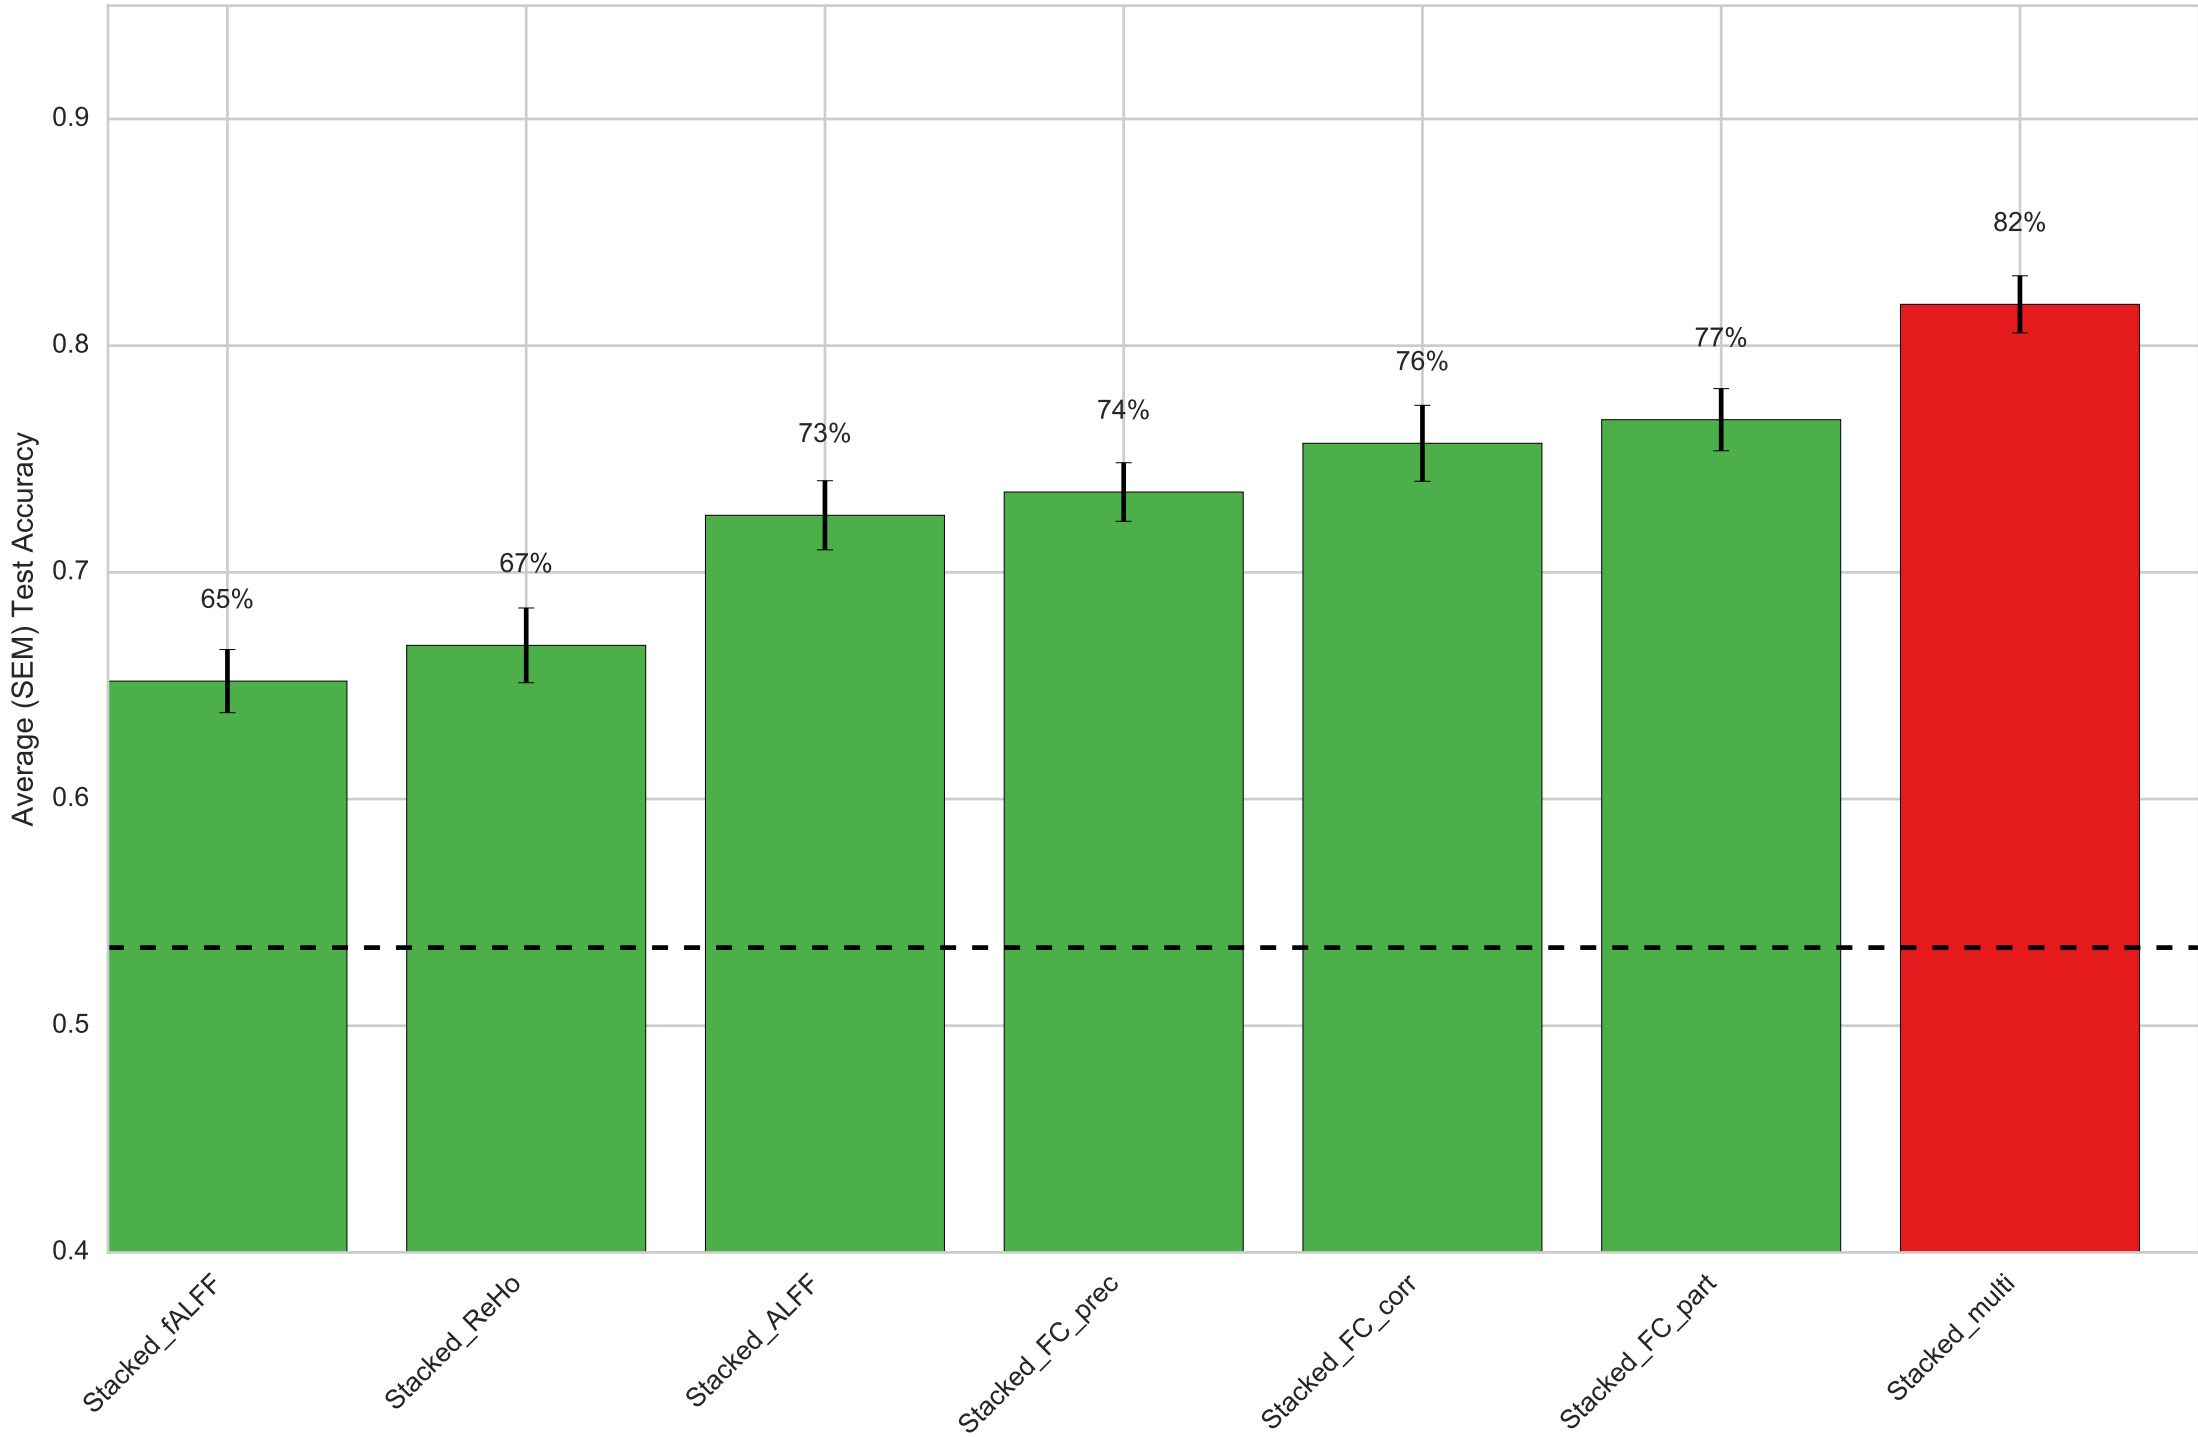



Top 30% Feature Selection  
Comparison across stacked predictions for various feature types  
10 fold cross-validation - 5 shuffled iterations

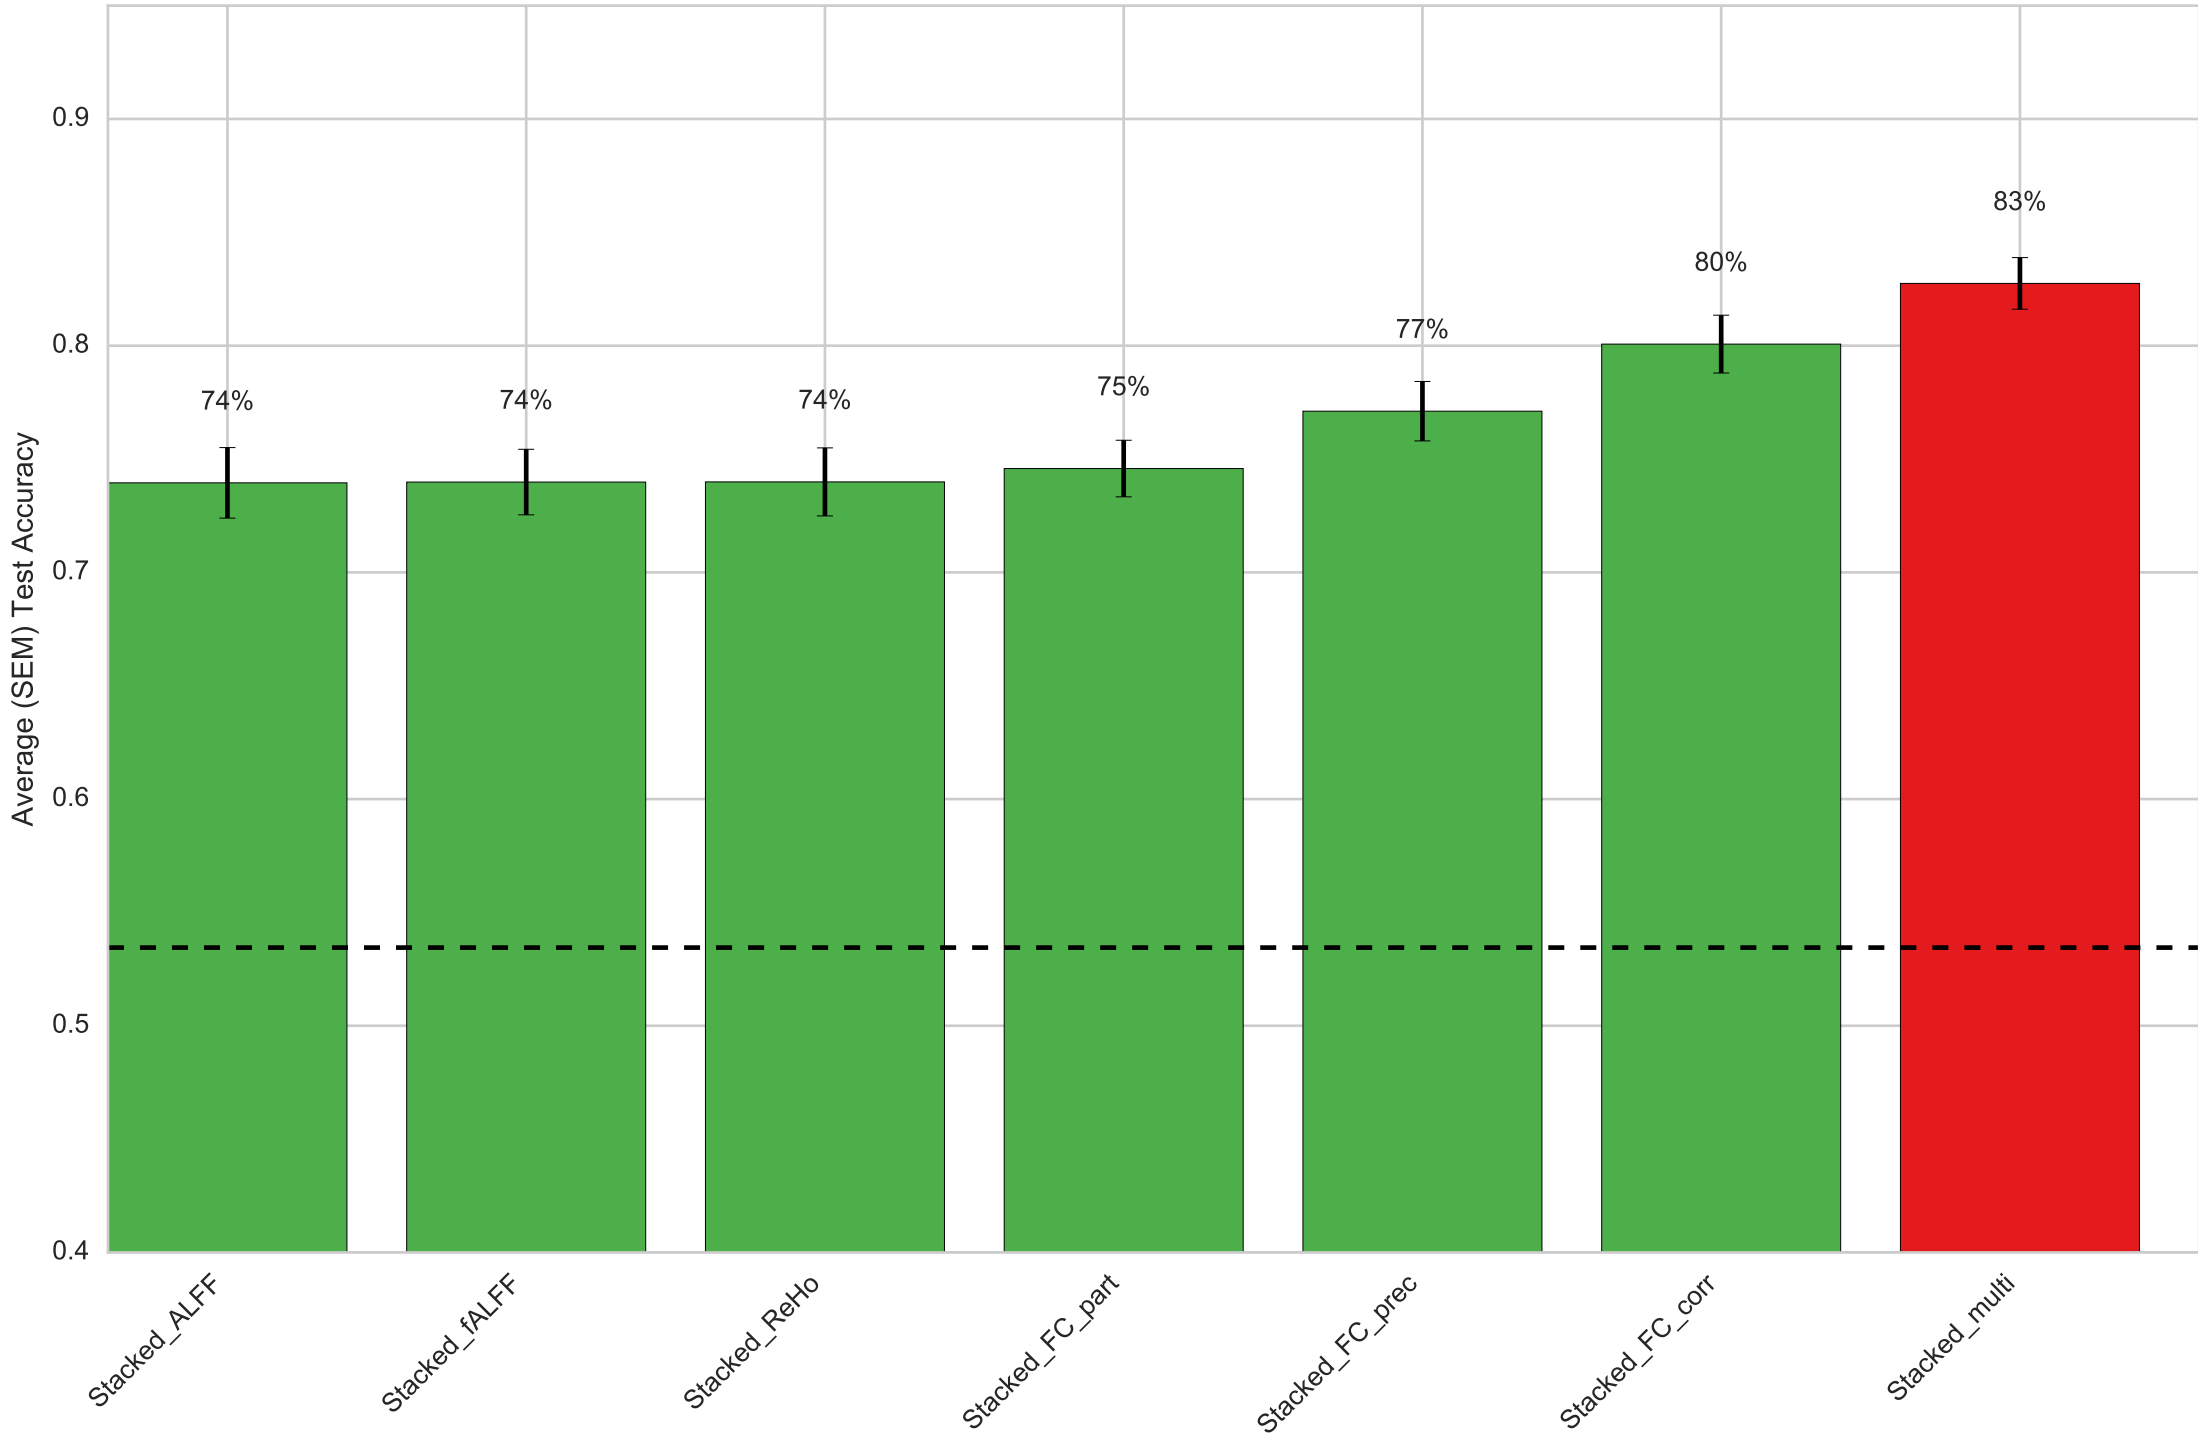

Top 1% Feature Selection  
Comparison across stacked predictions for various feature types  
10 fold cross-validation - 5 shuffled iterations

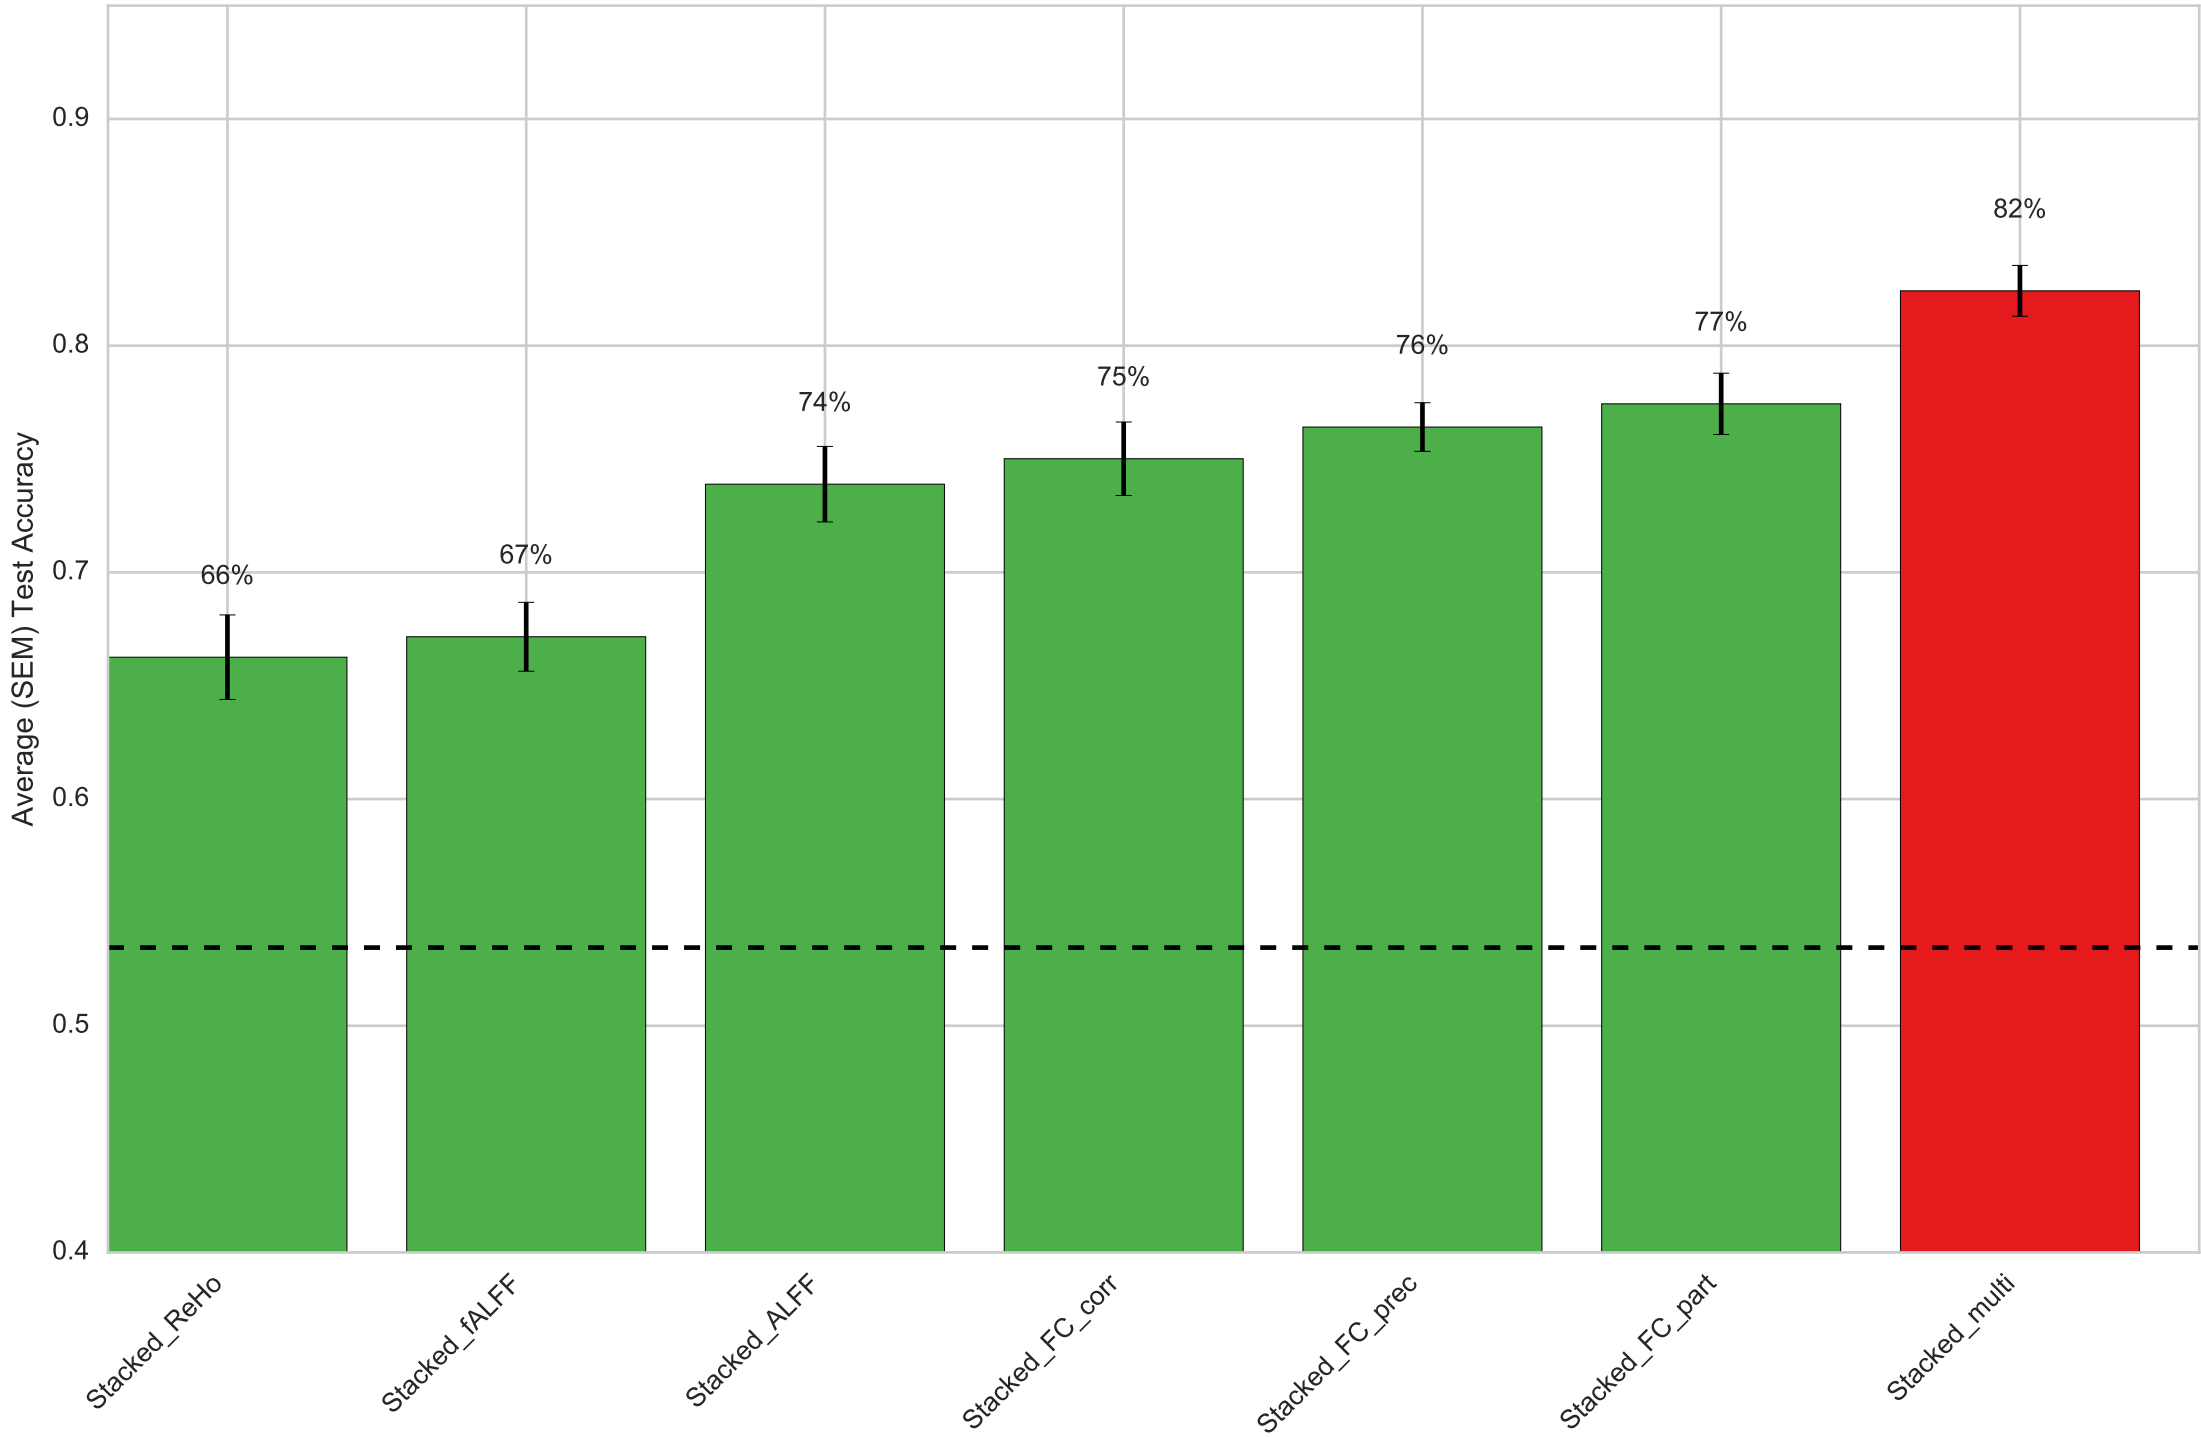

Top 30% FC, 100% regional Feature Selection  
Comparison across stacked predictions for various feature types  
10 fold cross-validation - 5 shuffled iterations

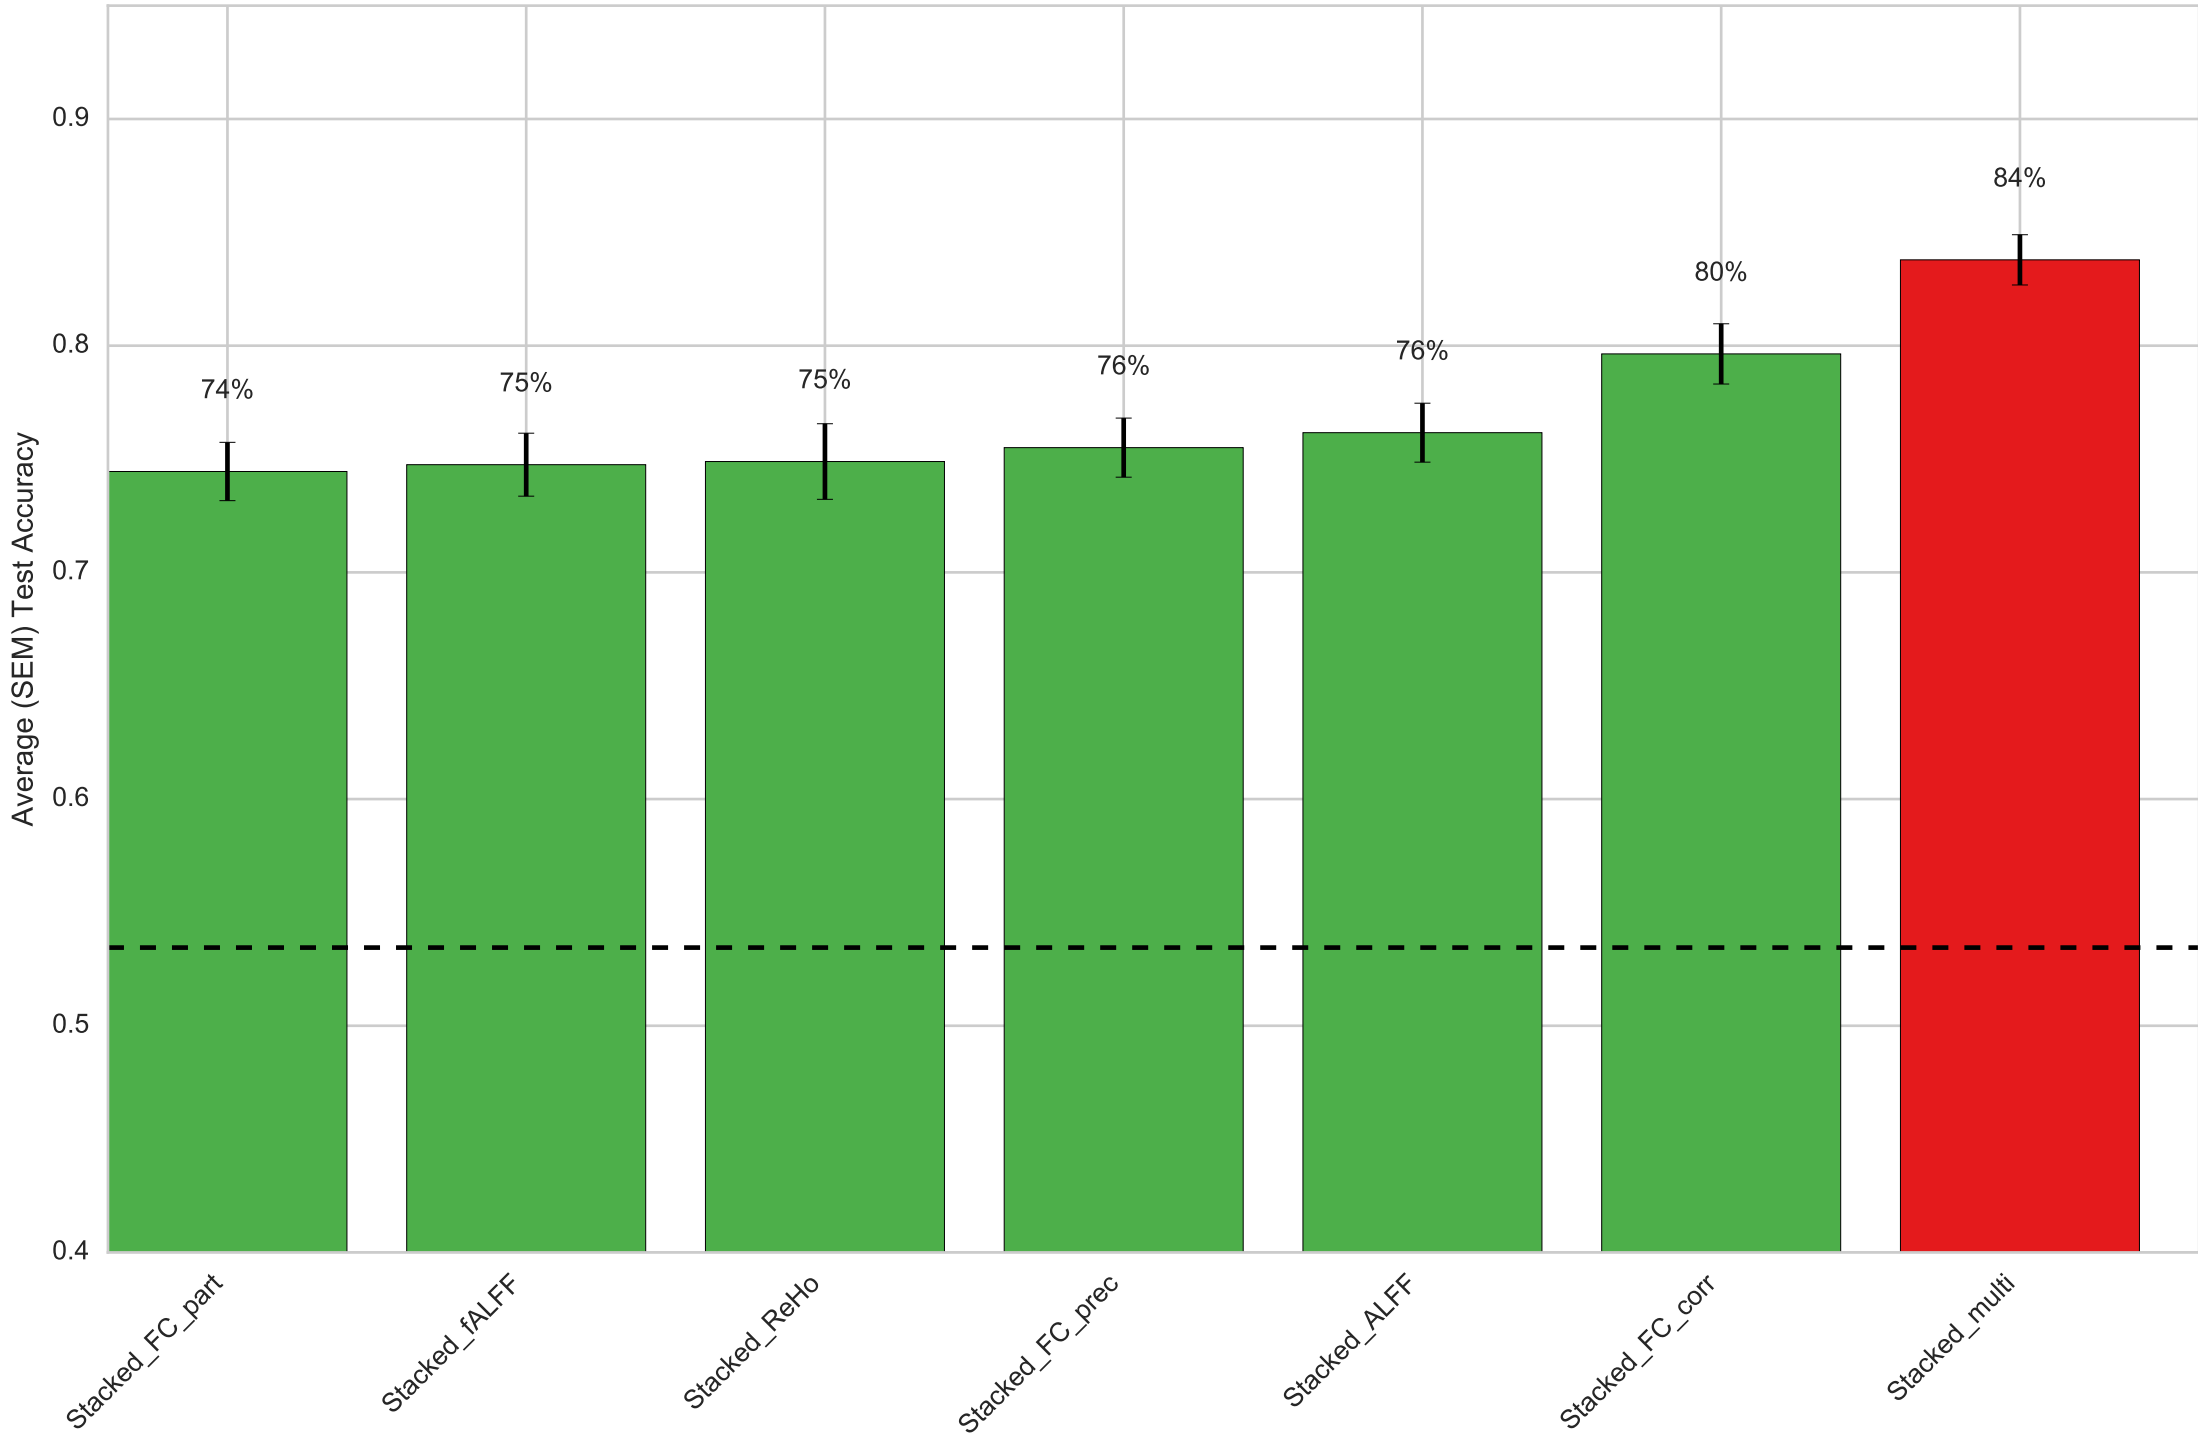

Top 20% Feature Selection  
Comparison across stacked predictions for various feature types  
10 fold cross-validation - 5 shuffled iterations

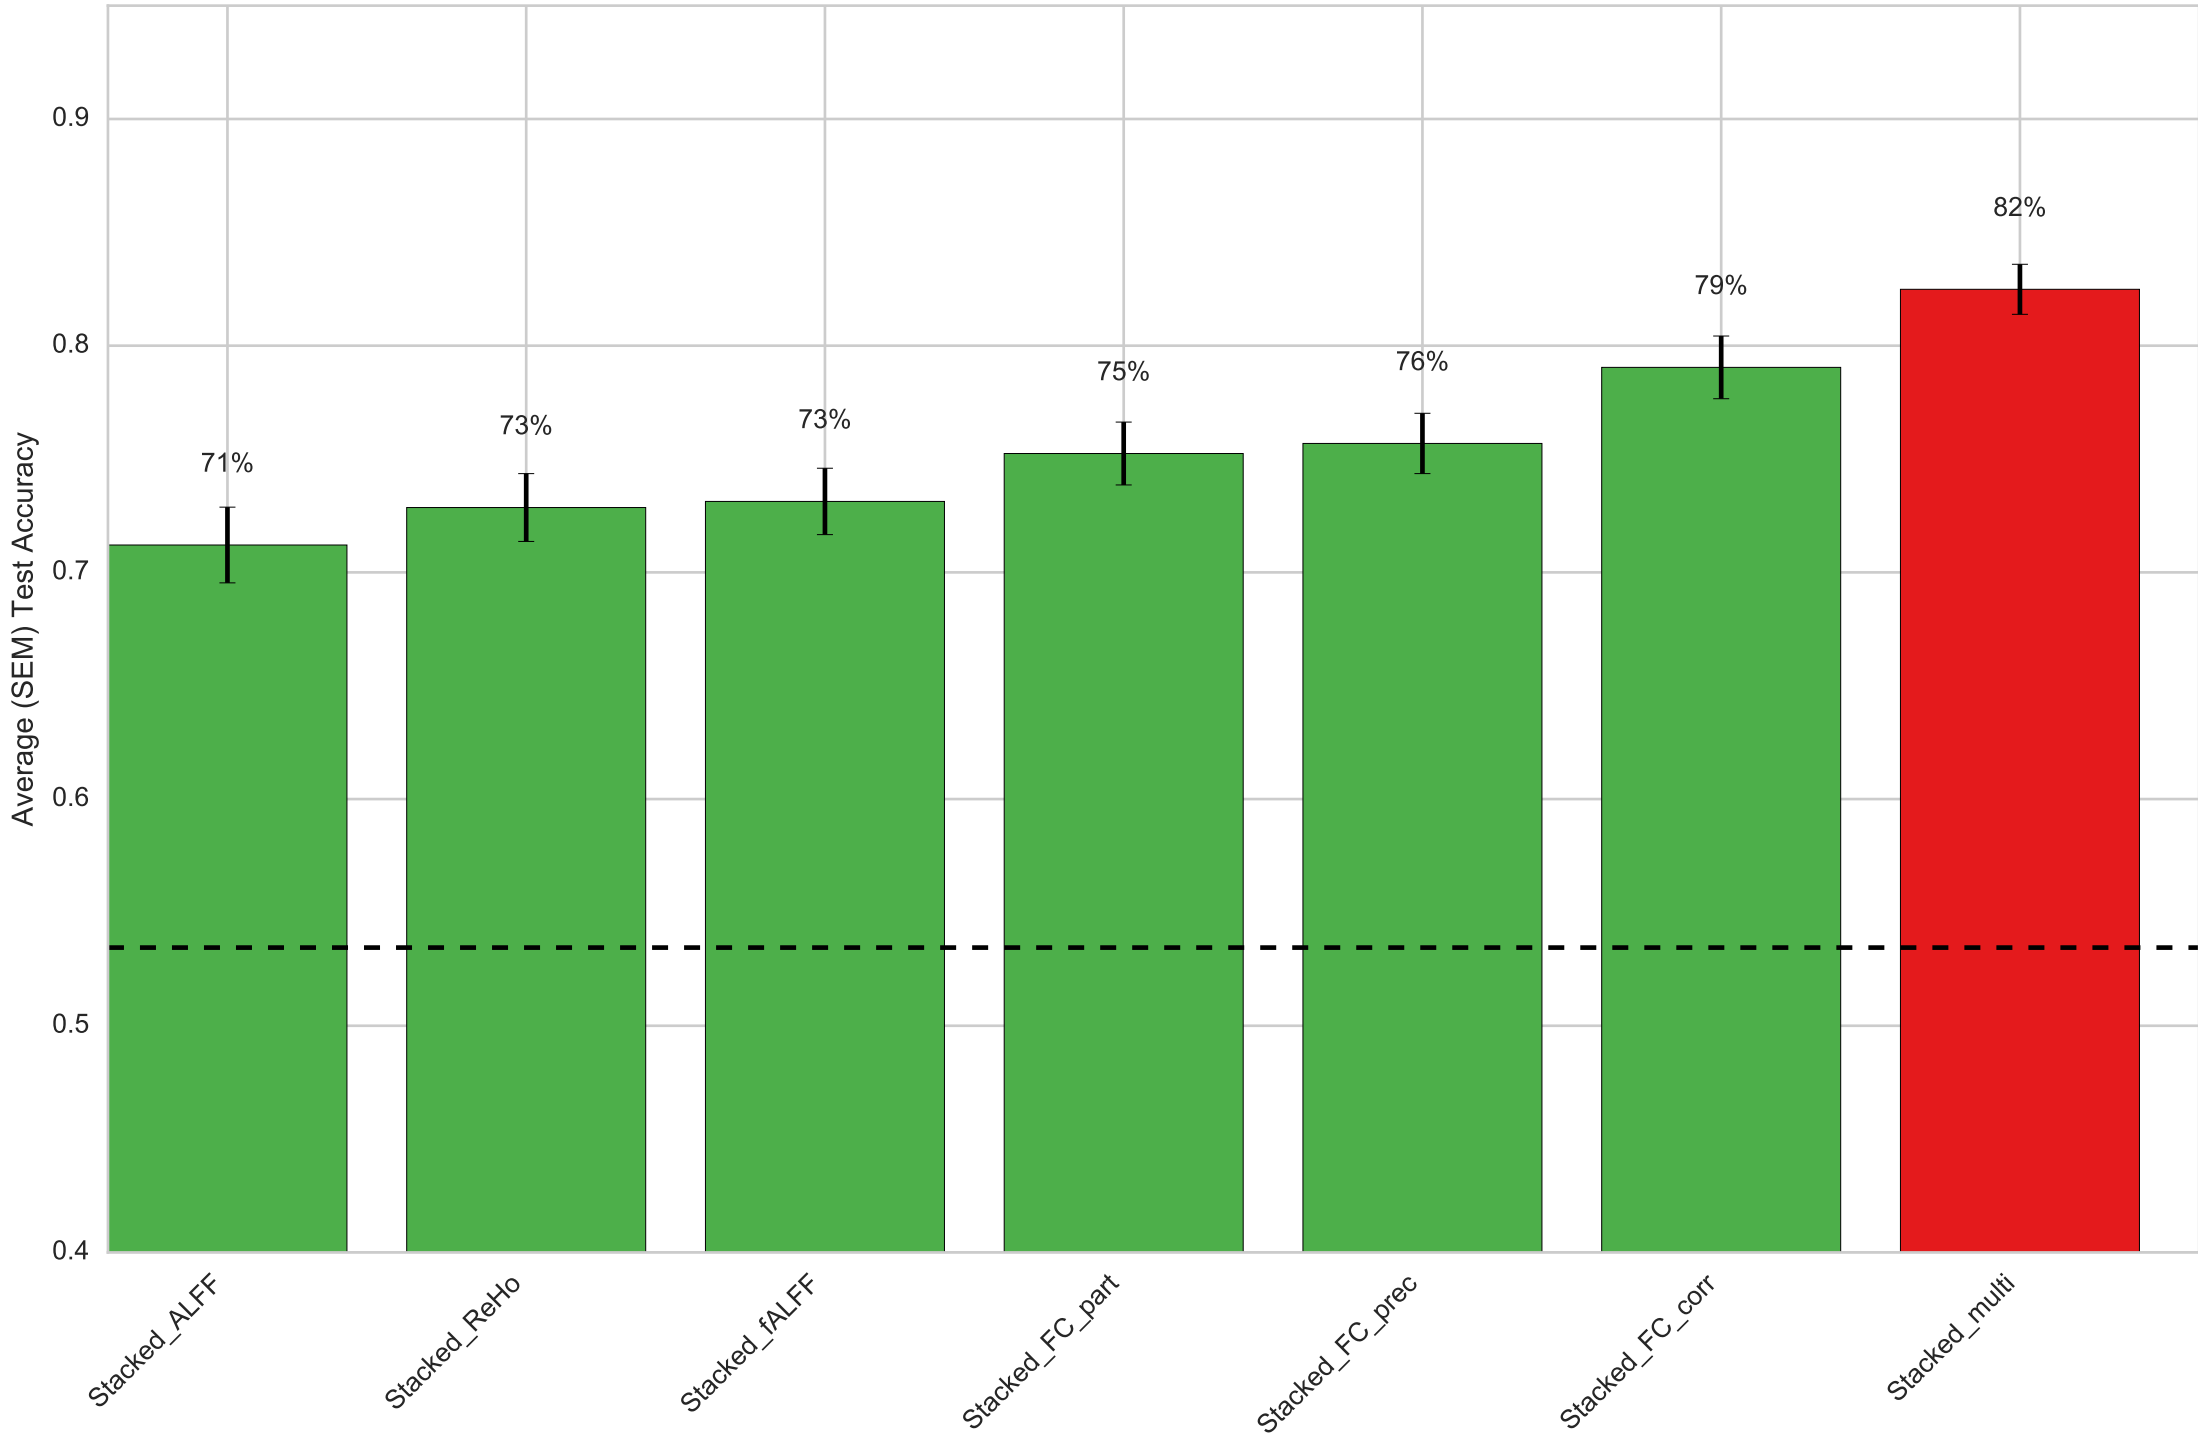

100% Features  
Comparison across stacked predictions for various feature types  
10 fold cross-validation - 5 shuffled iterations

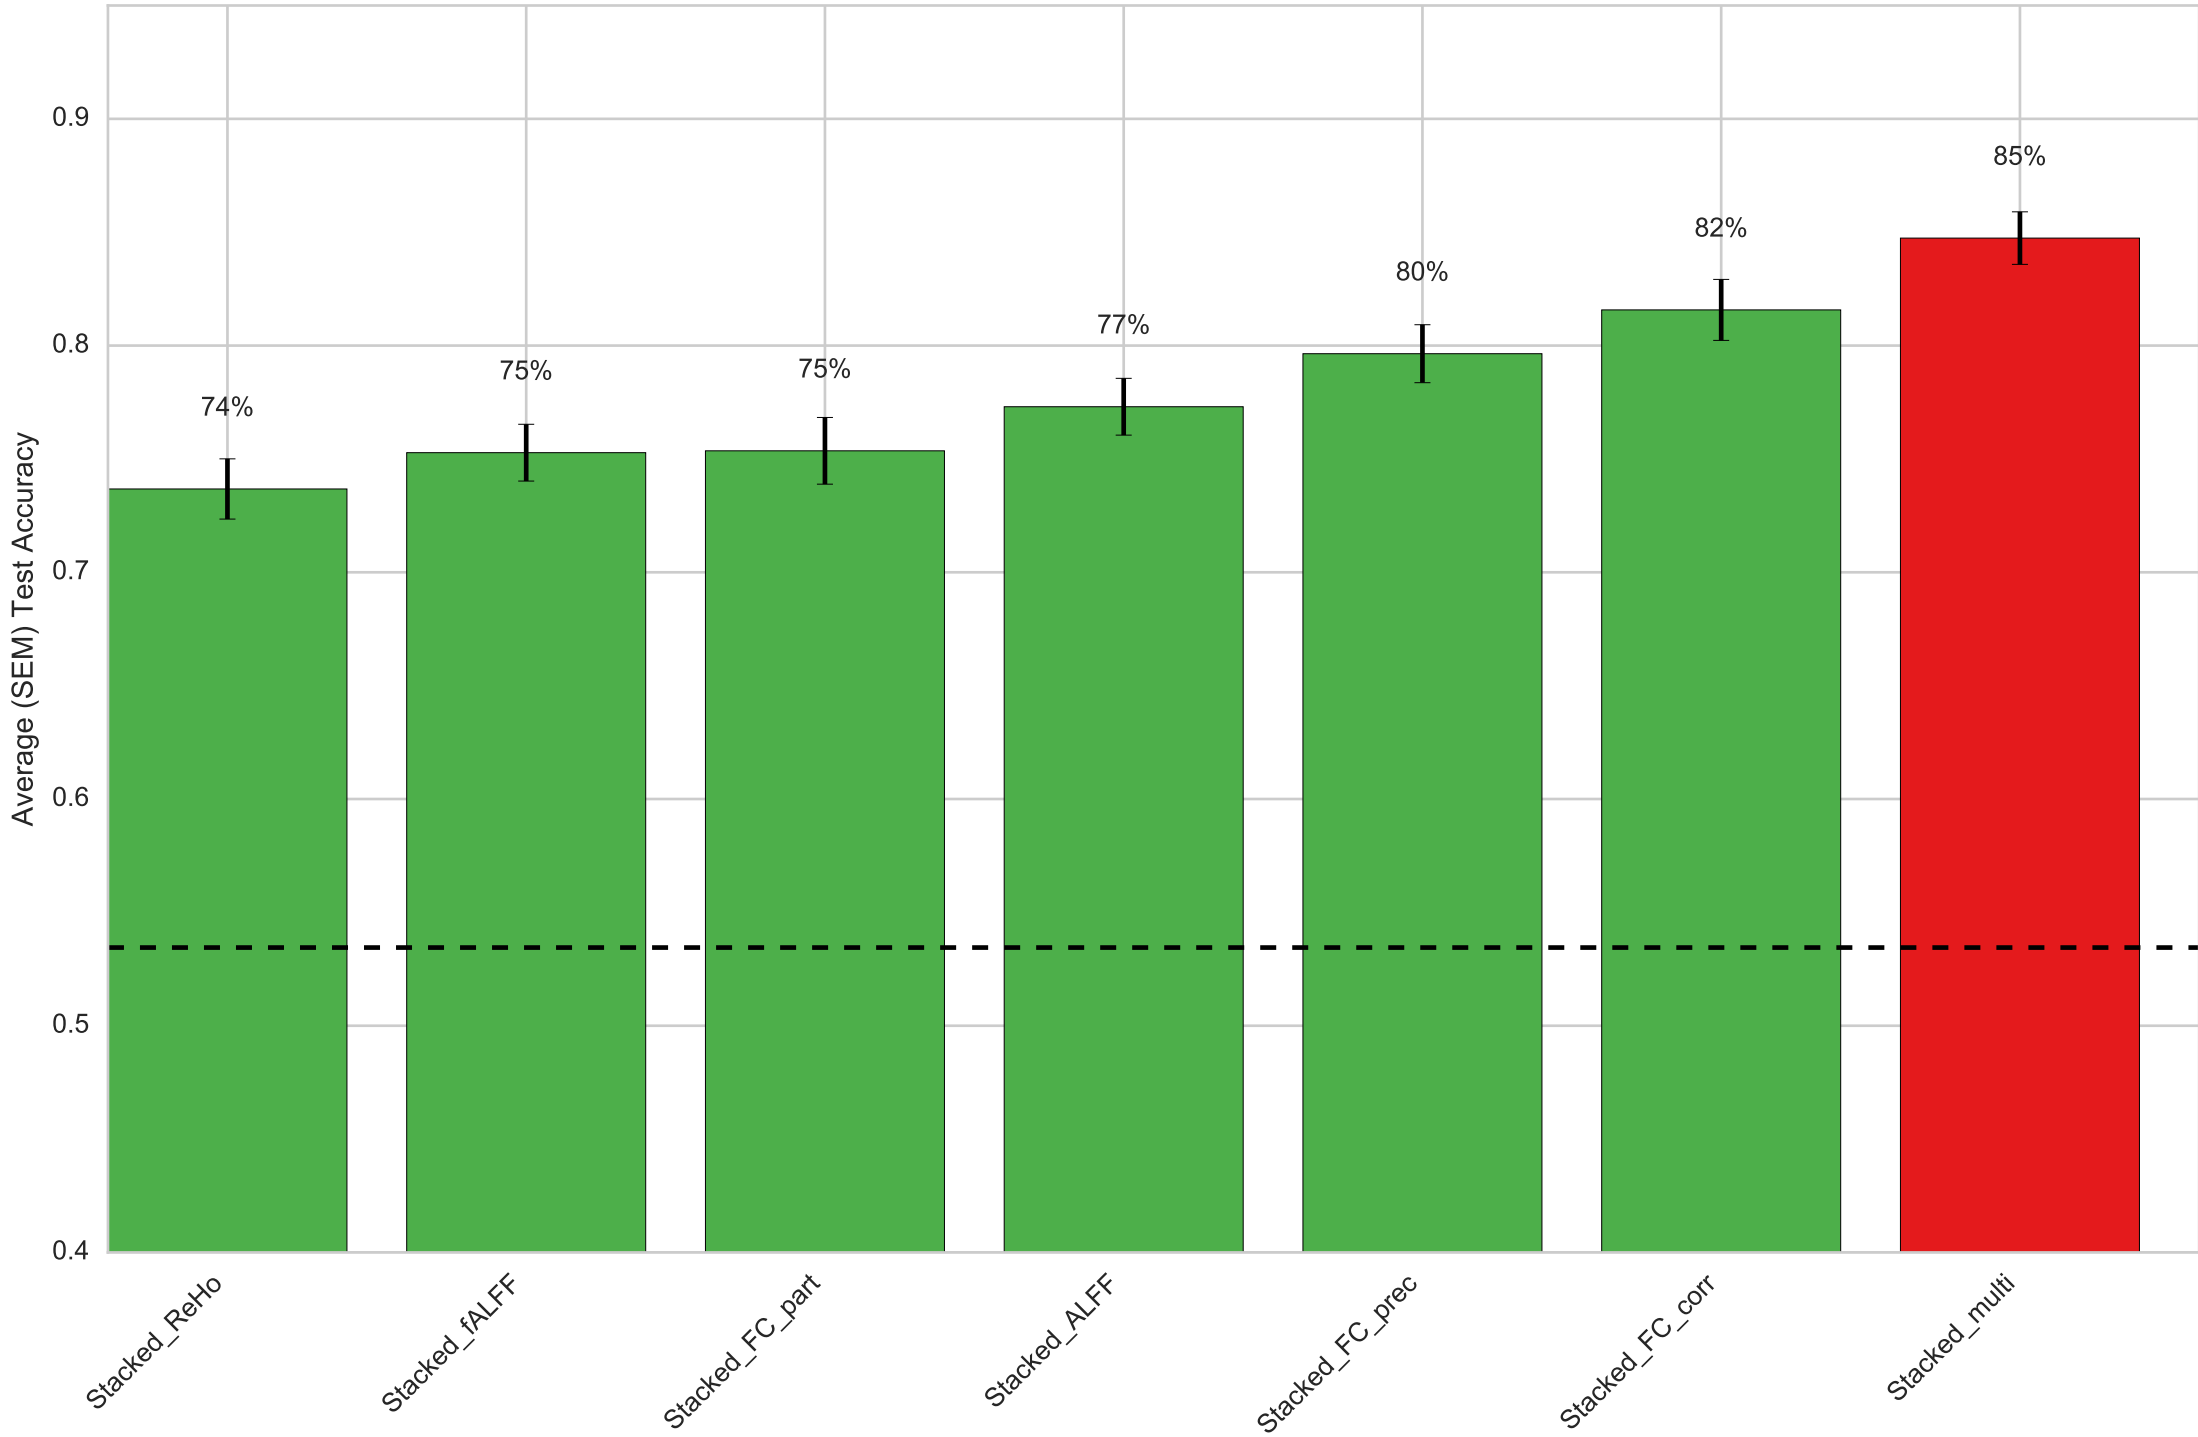

Comparison of prediction accuracy for single-source models (blue) and stacked model (green) for a feature type.  
Final ensemble model shown in red

Feature selection / reduction method :PCA - Dimensional Reduction

fALFF : PCA - Dimensional Reduction  
Comparison across 14 parcellations and stacked predictions  
10 fold cross-validation - 5 shuffled iterations

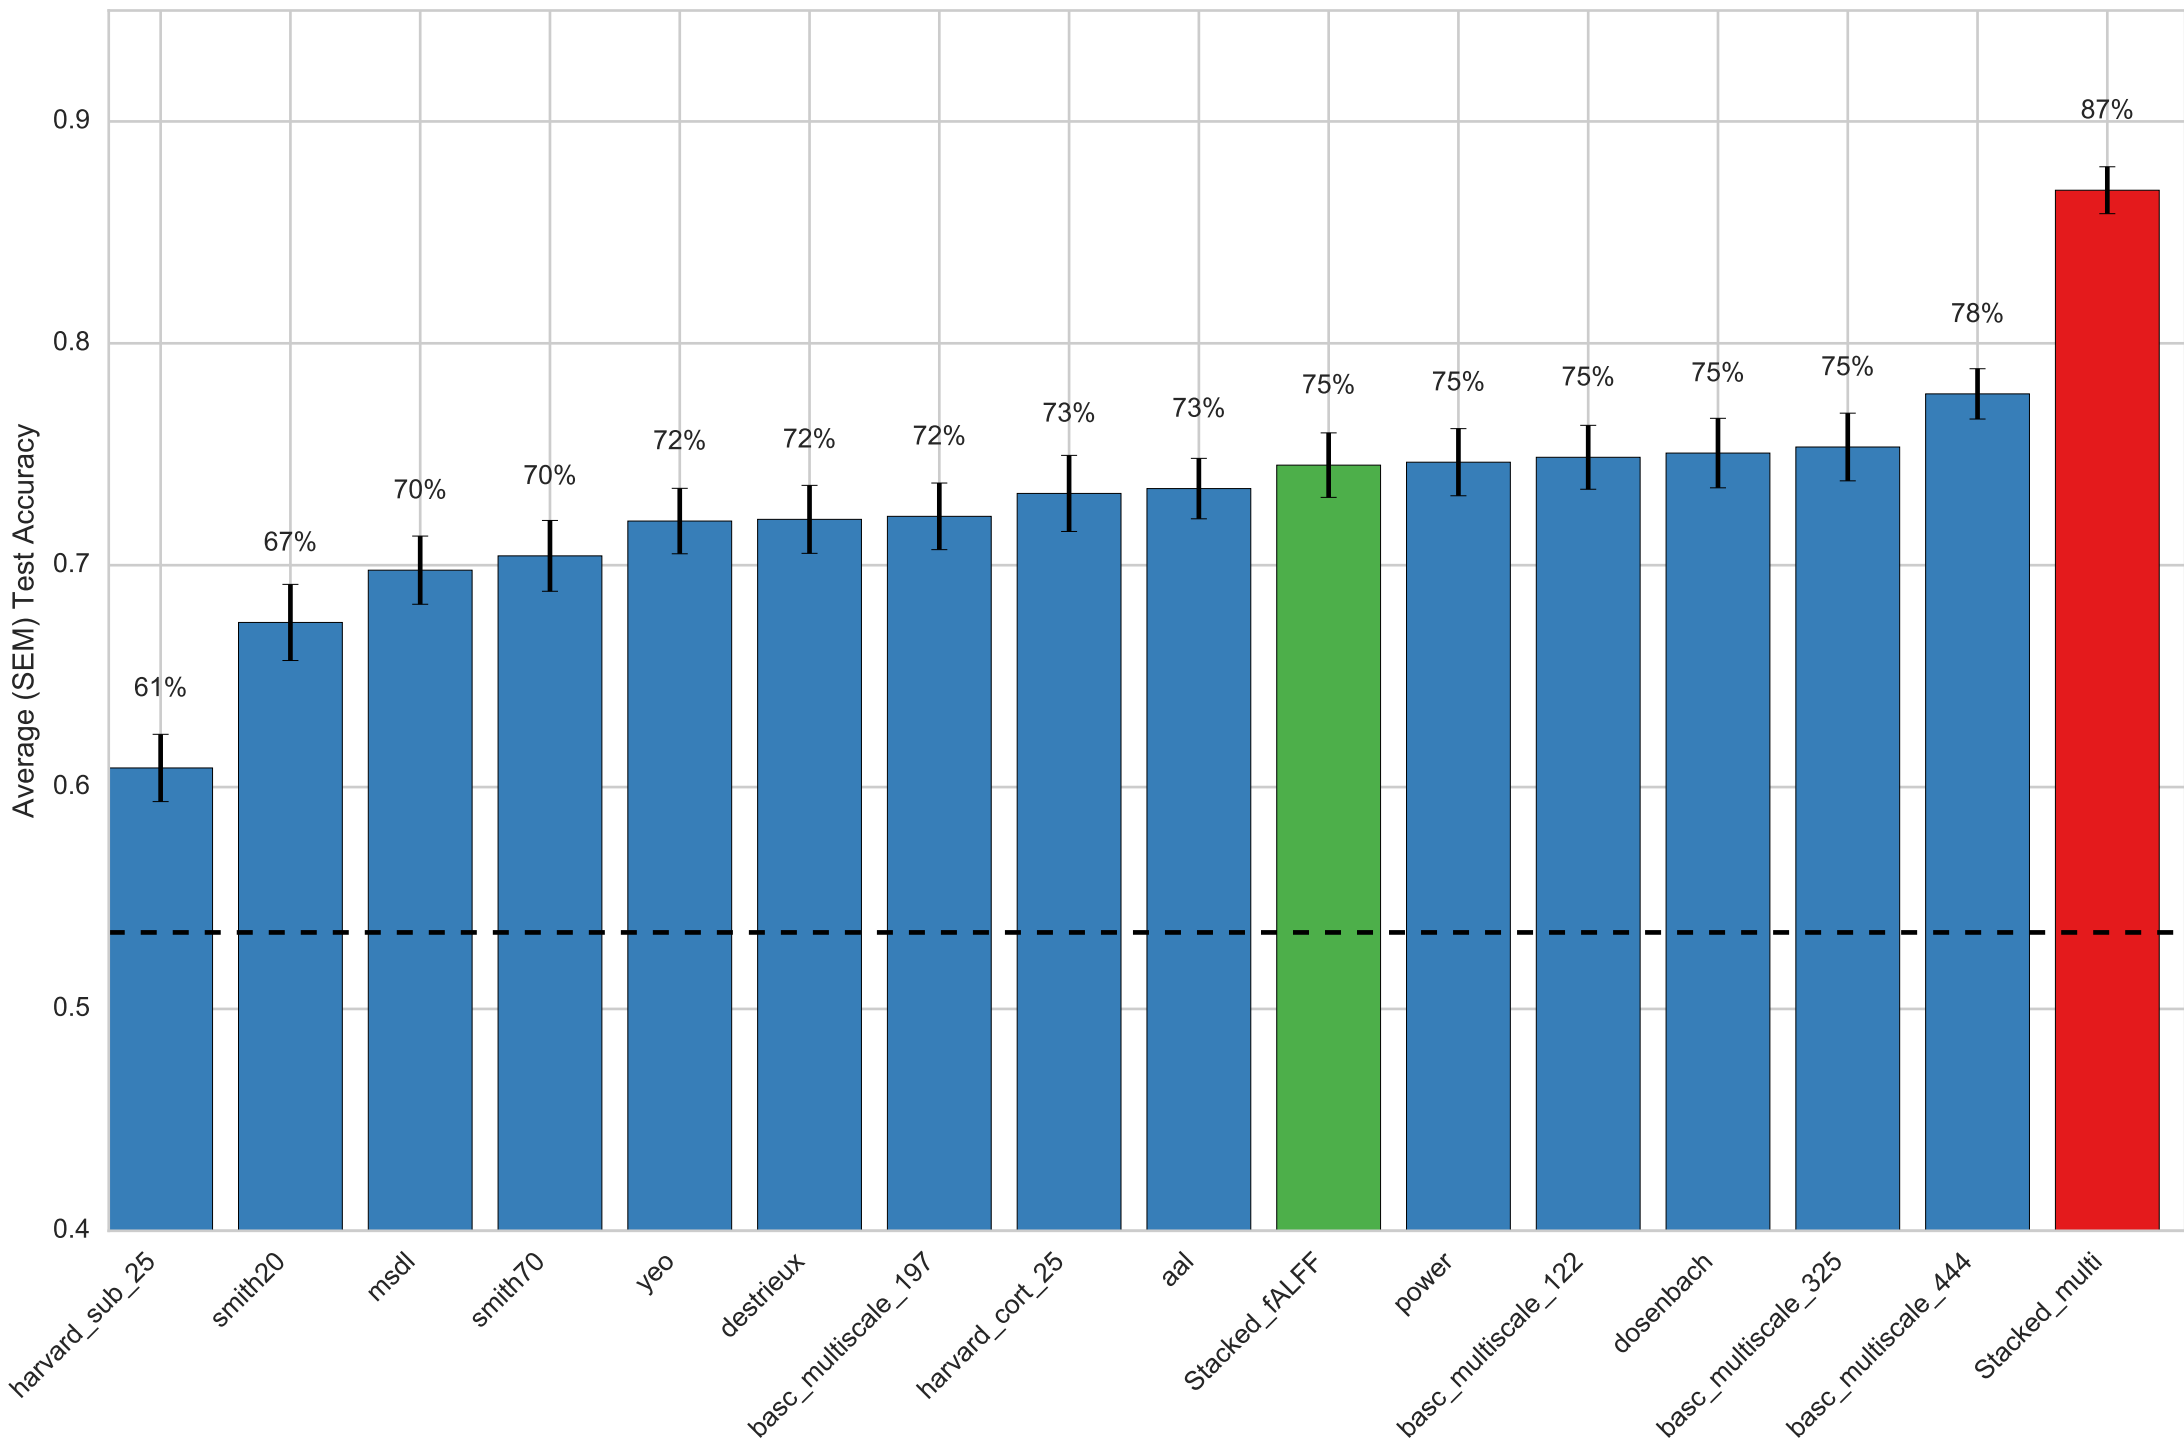



FC\_corr : PCA - Dimensional Reduction  
Comparison across 14 parcellations and stacked predictions  
10 fold cross-validation - 5 shuffled iterations

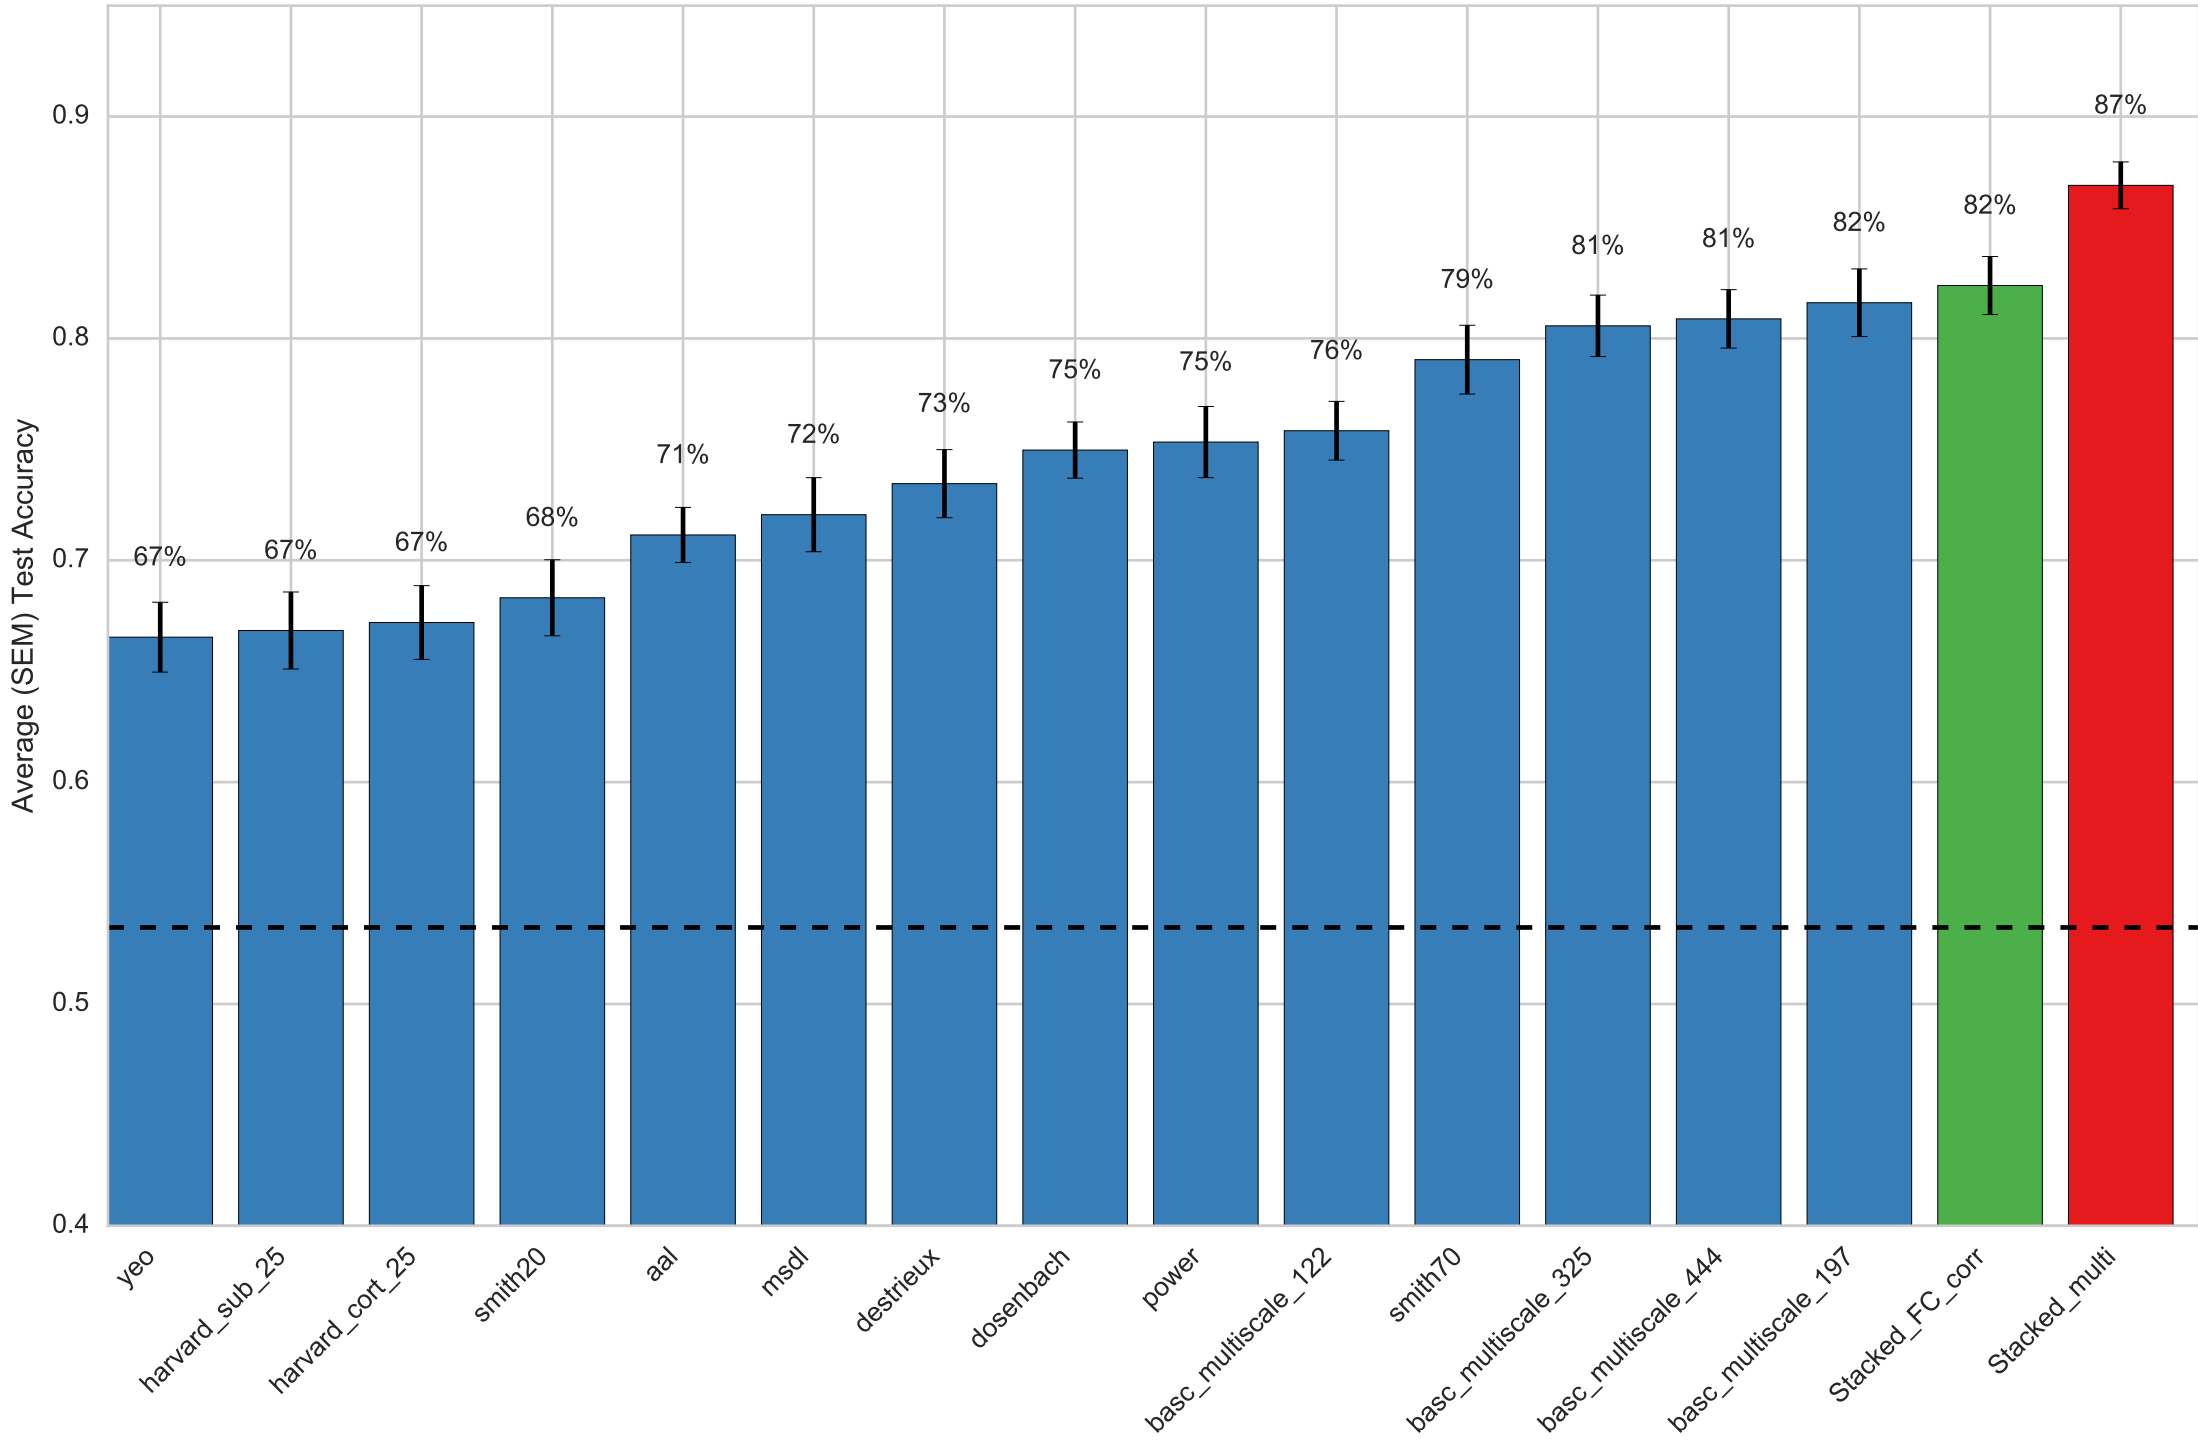

FC\_part : PCA - Dimensional Reduction  
Comparison across 14 parcellations and stacked predictions  
10 fold cross-validation - 5 shuffled iterations

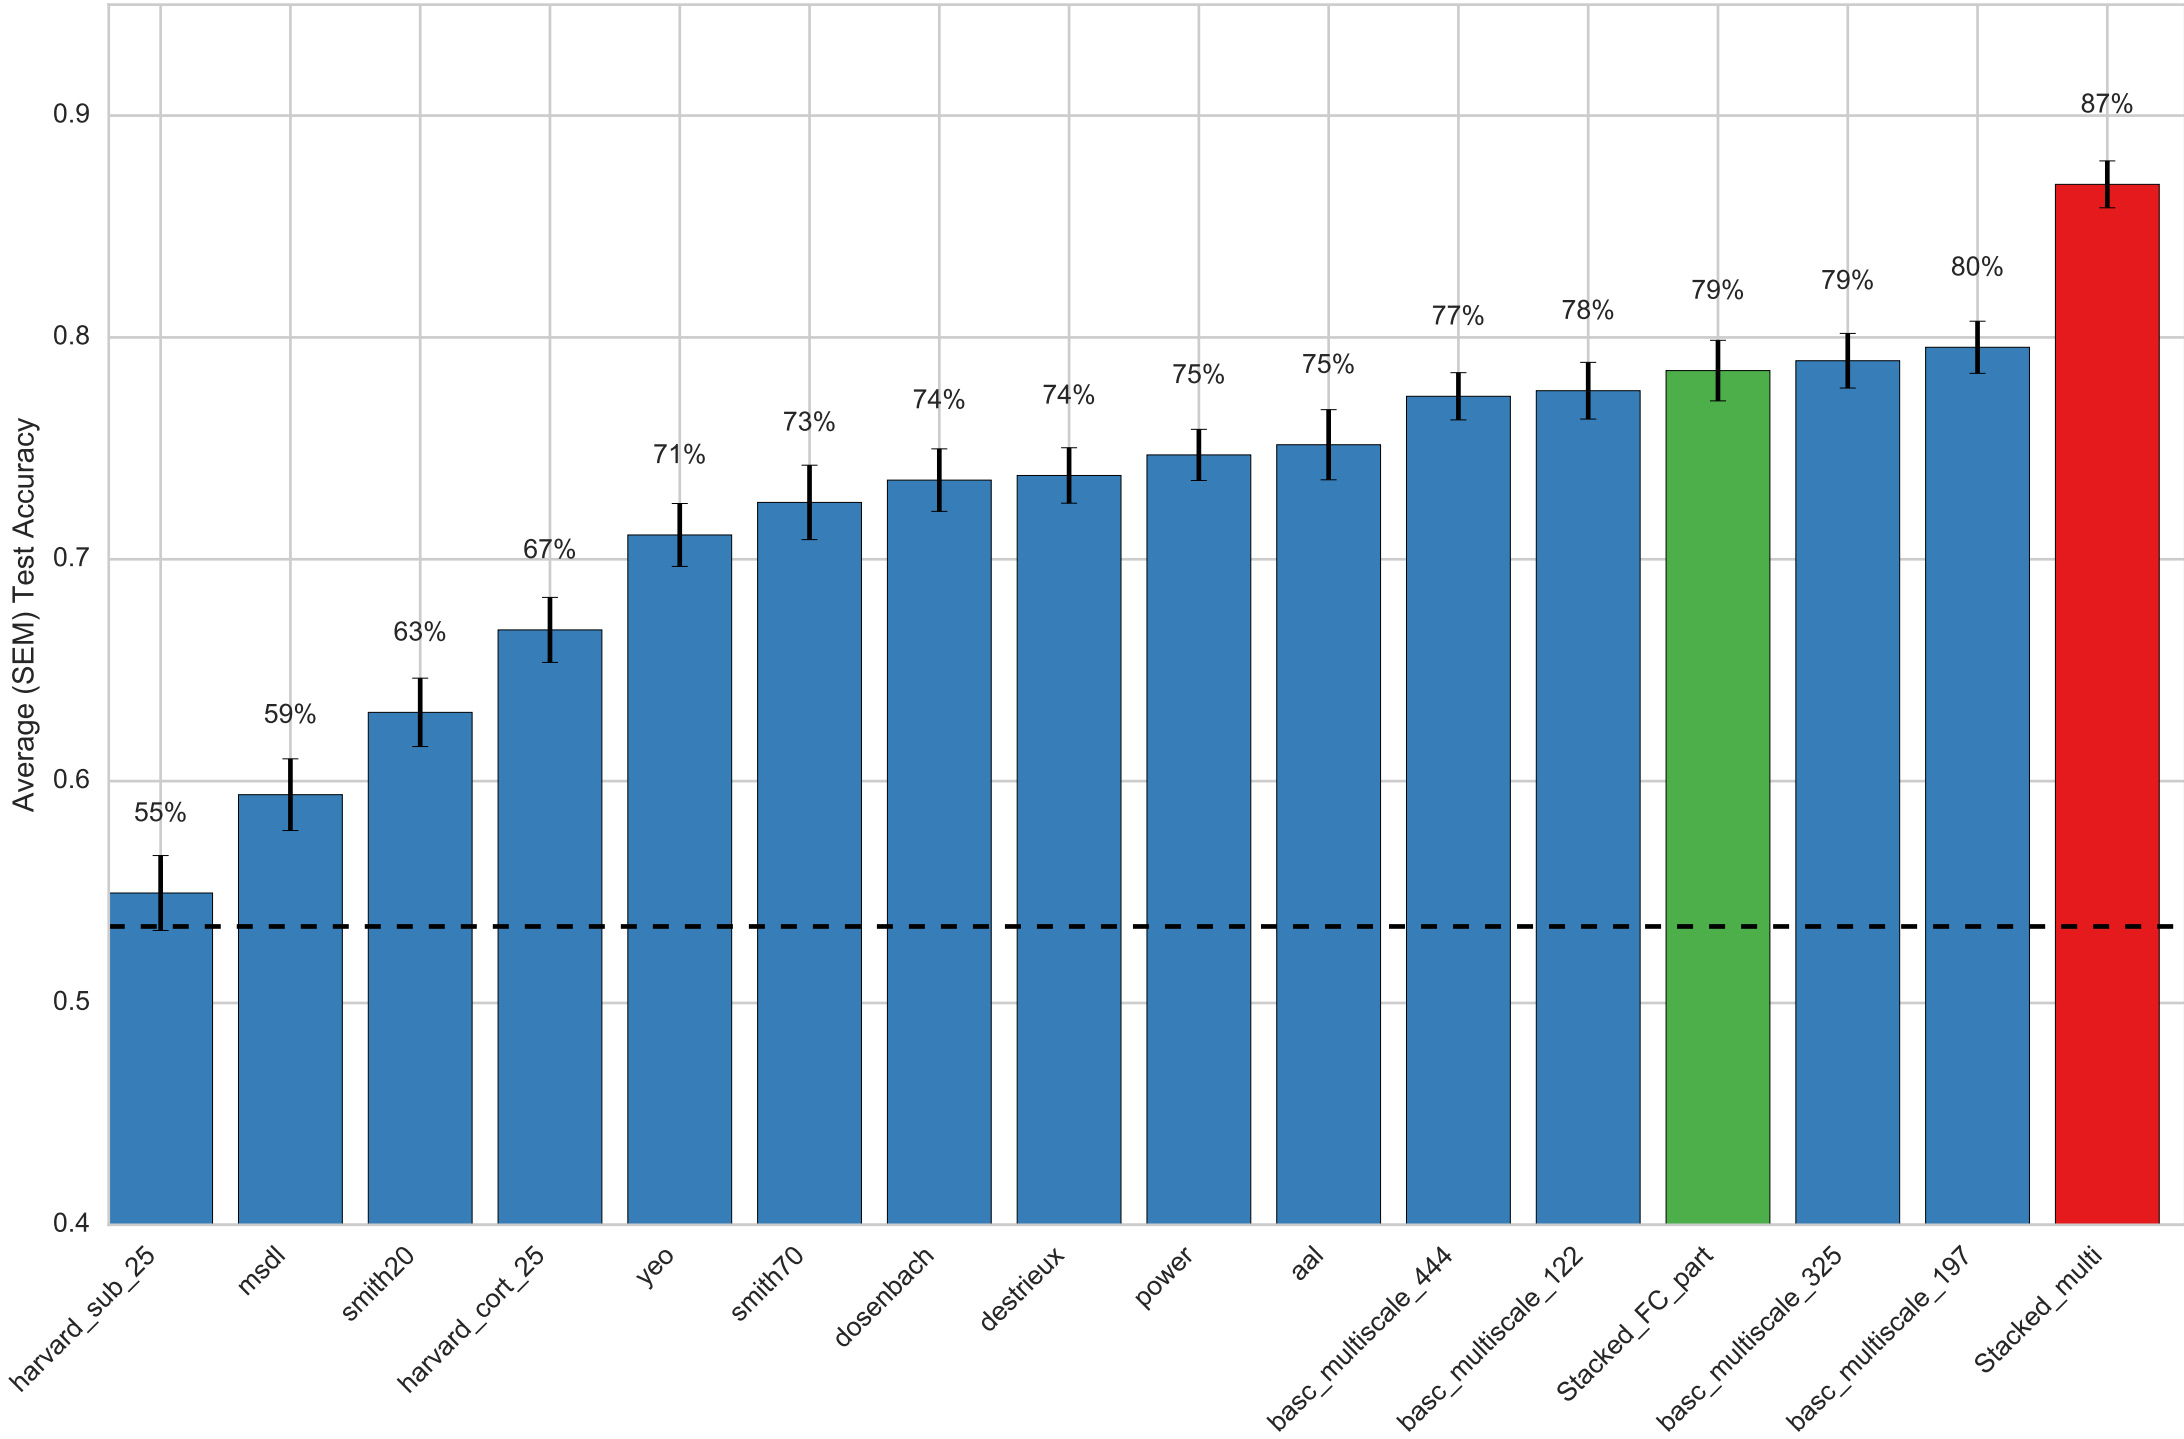

FC\_prec : PCA - Dimensional Reduction  
Comparison across 14 parcellations and stacked predictions  
10 fold cross-validation - 5 shuffled iterations

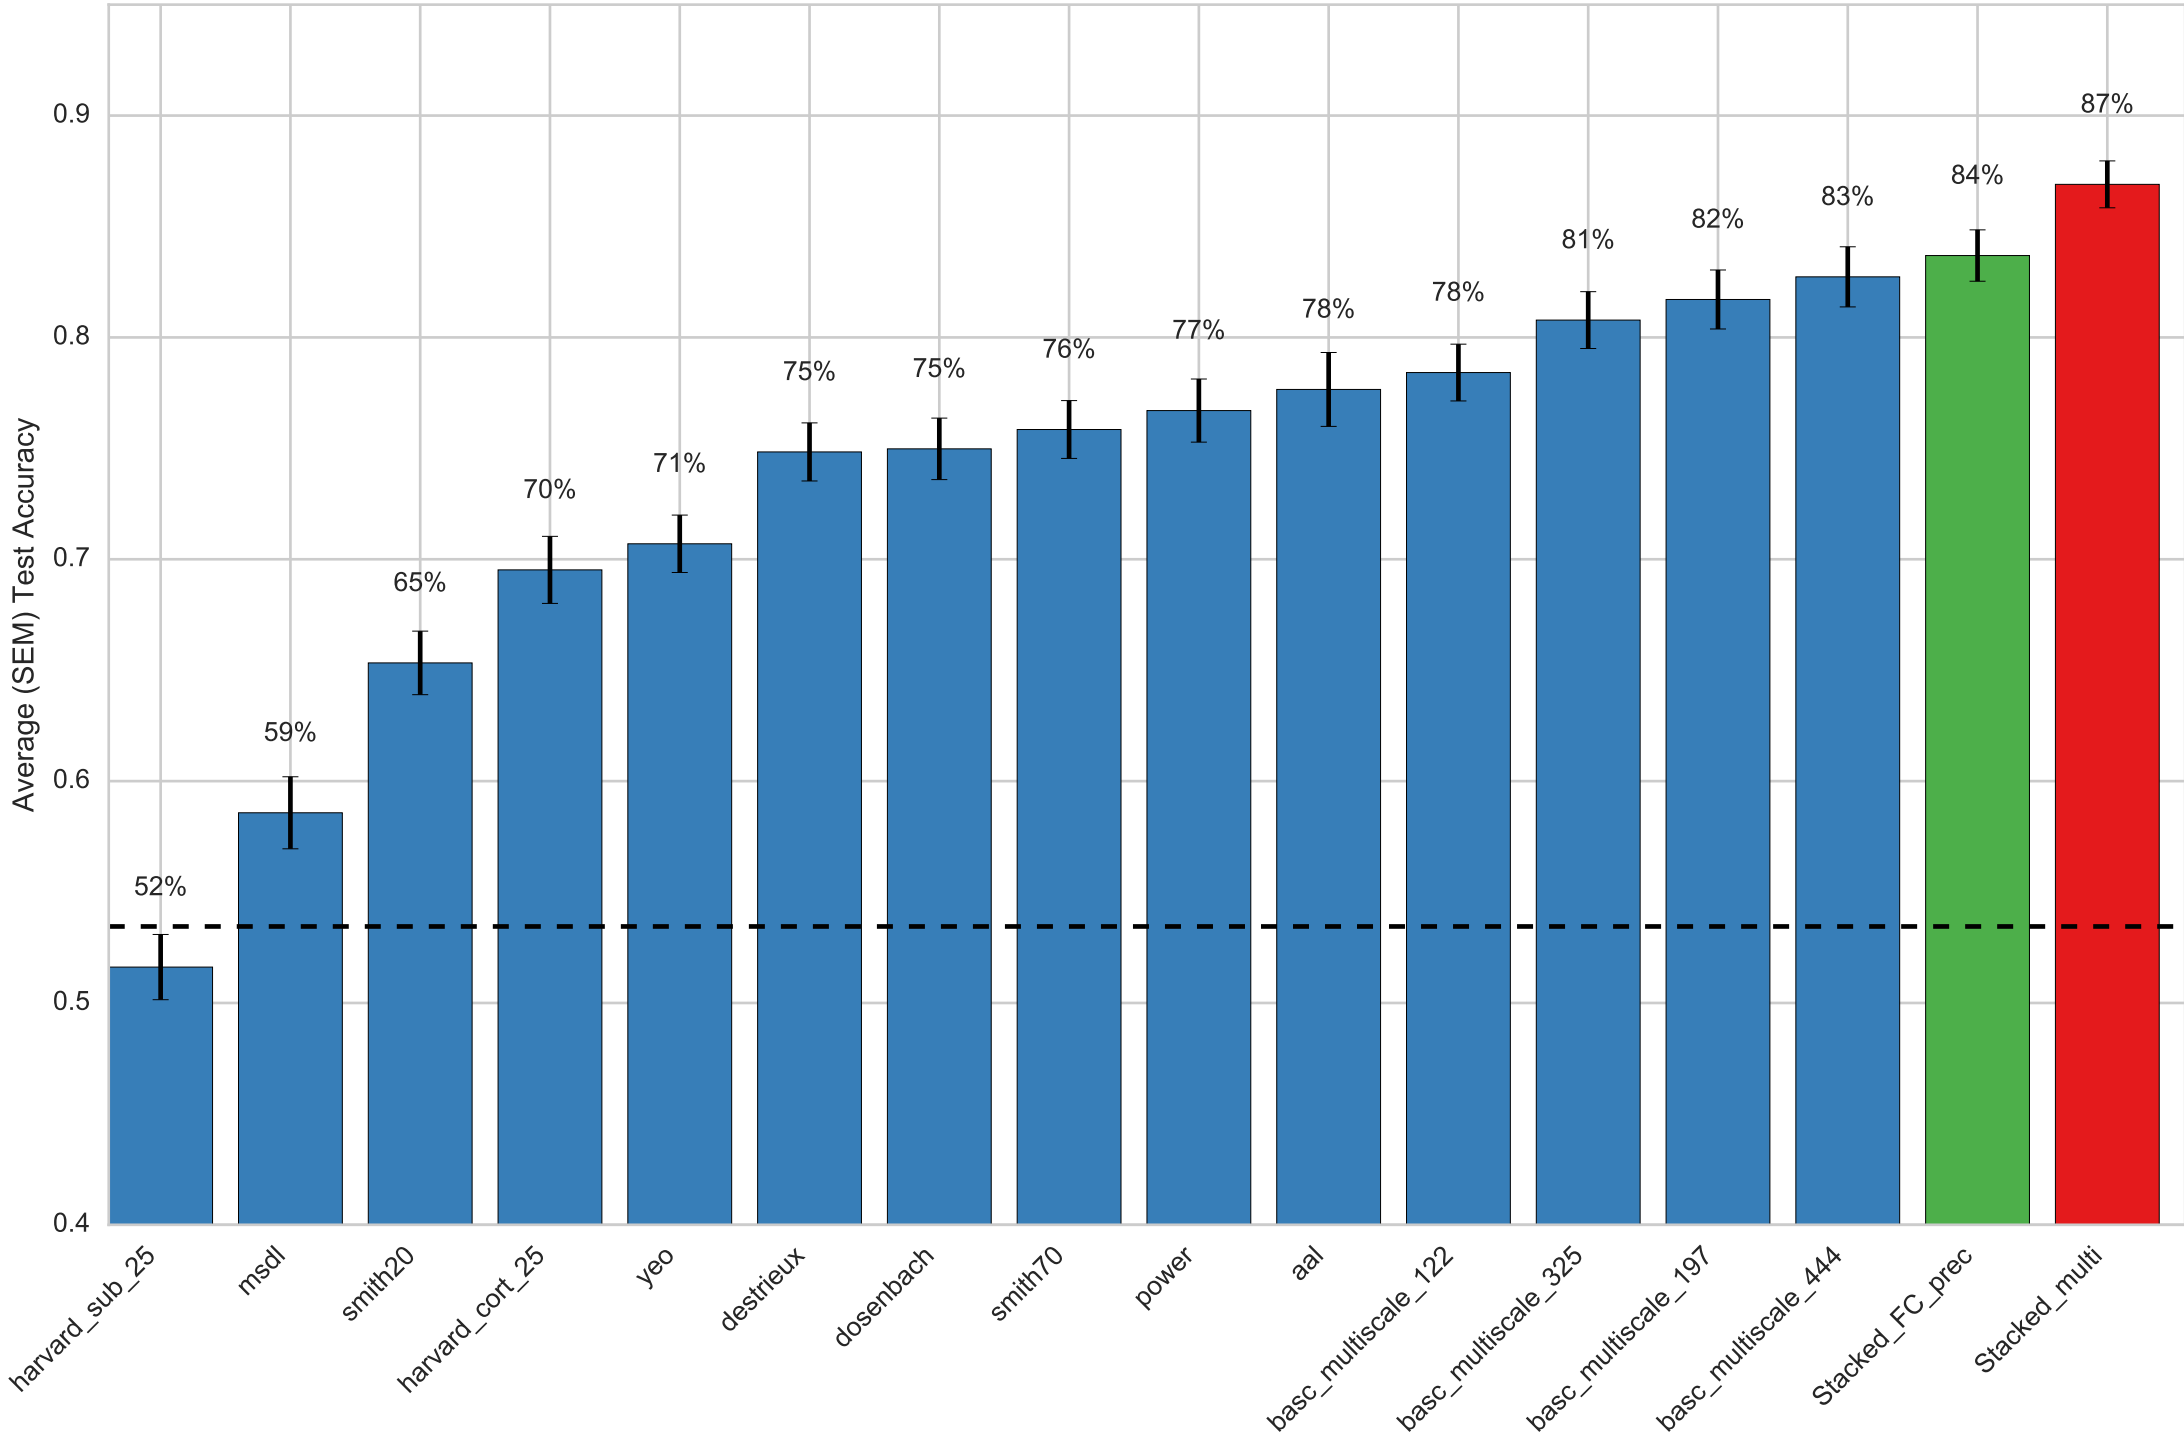

ReHo : PCA - Dimensional Reduction  
Comparison across 14 parcellations and stacked predictions  
10 fold cross-validation - 5 shuffled iterations

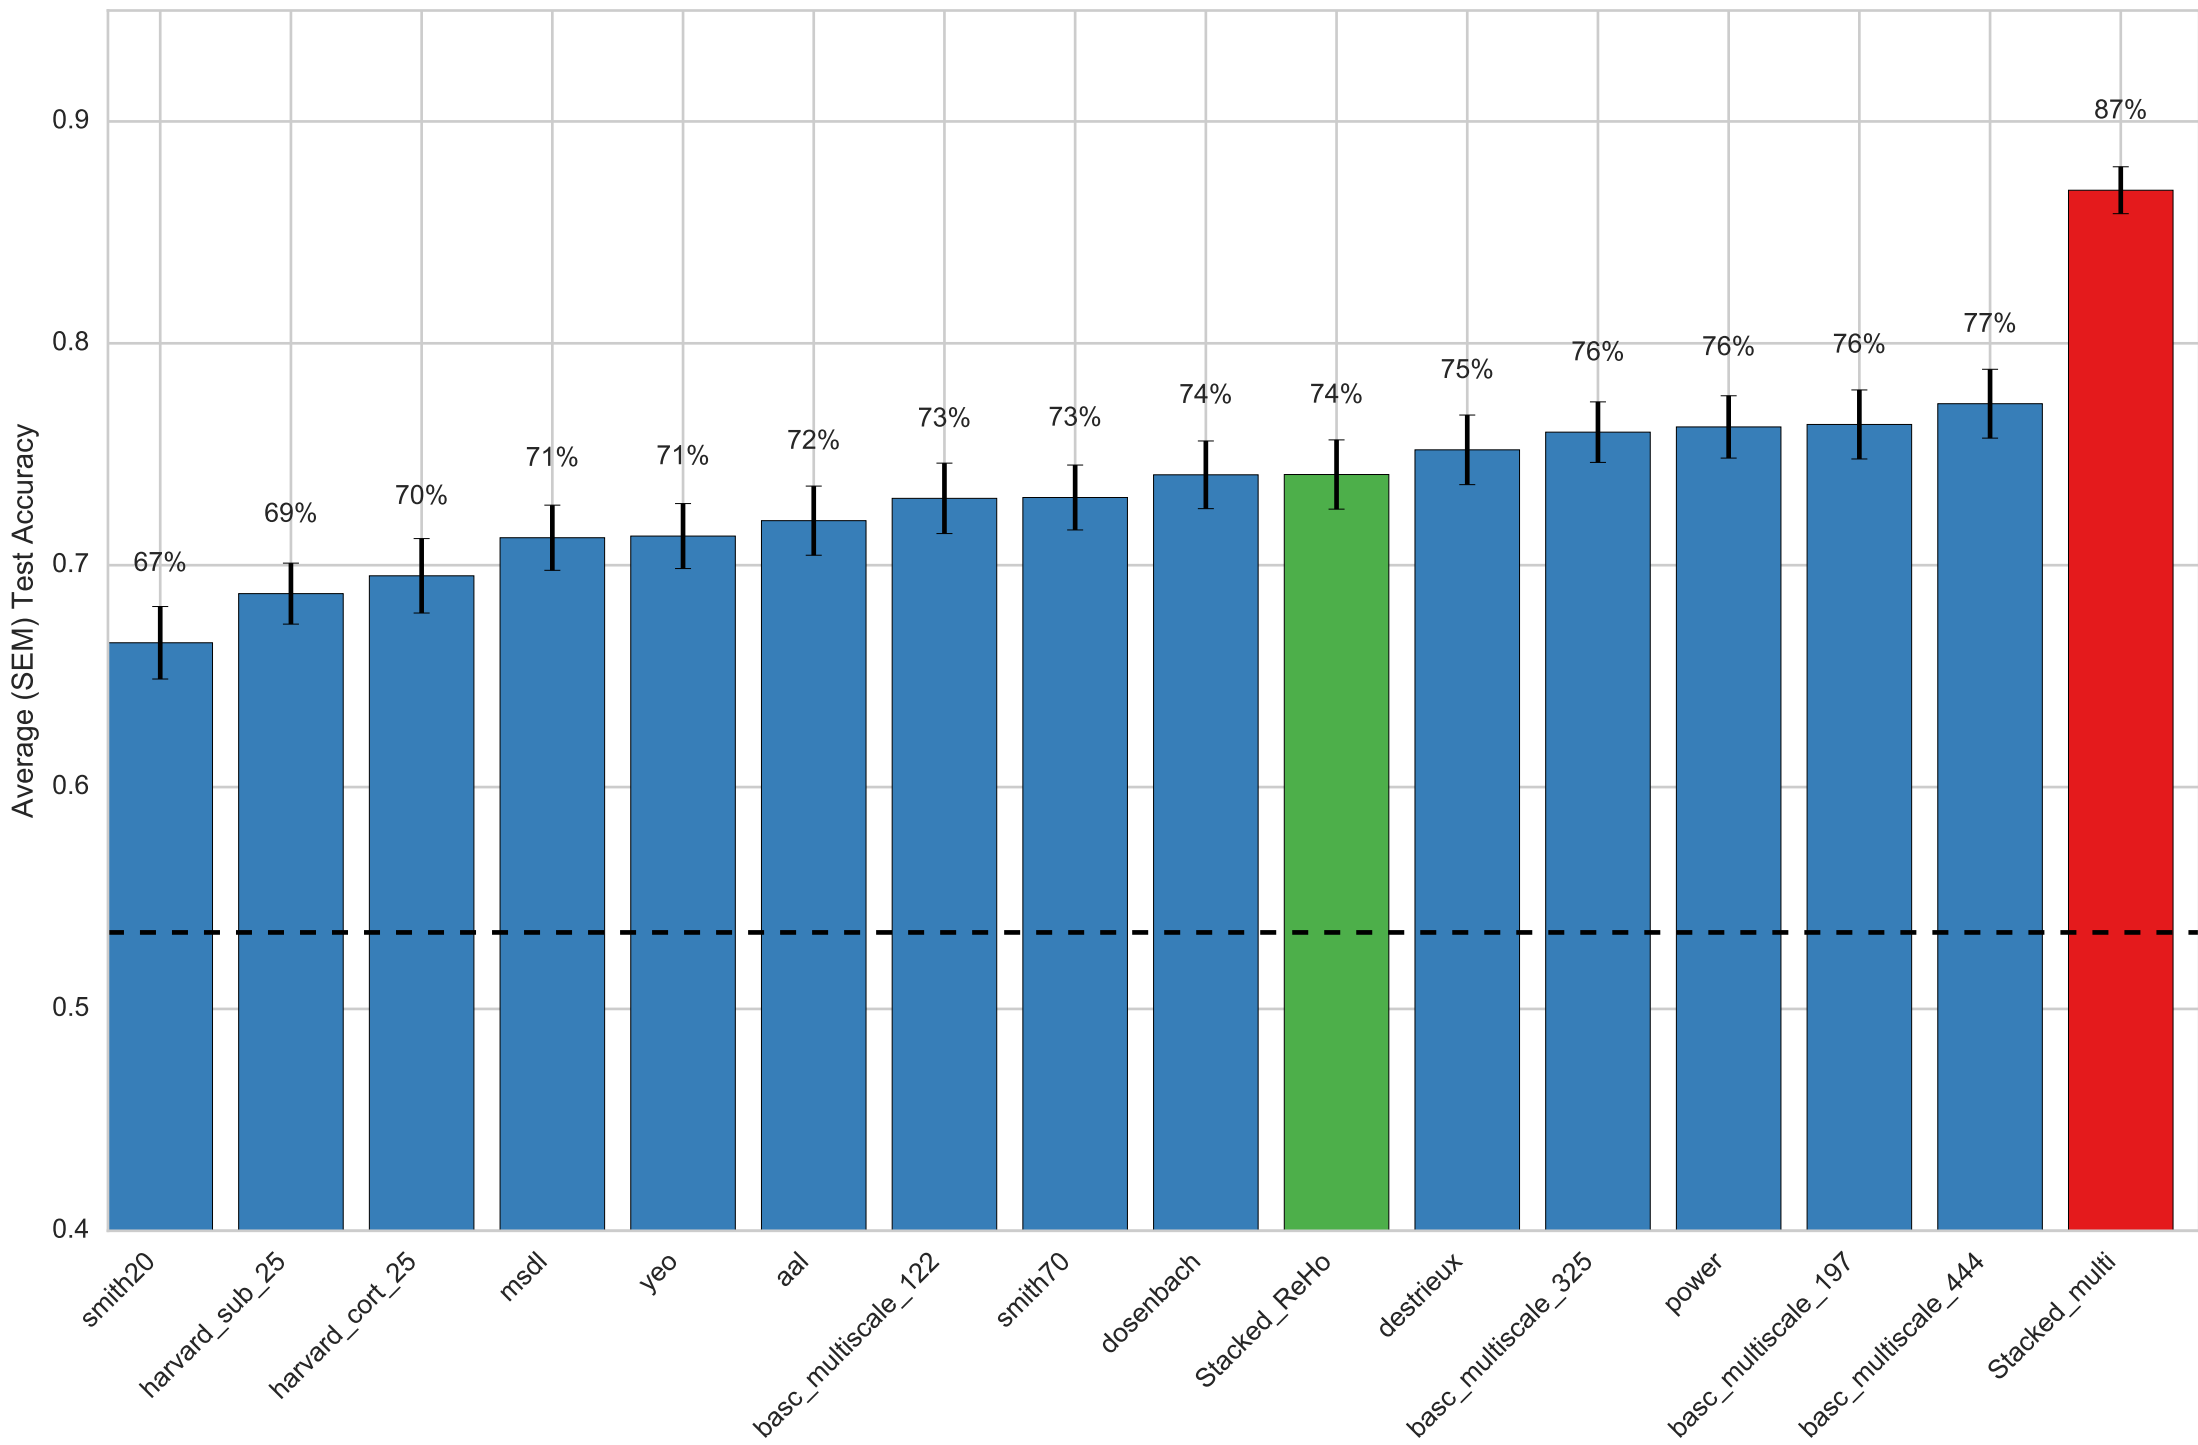

ALFF : PCA - Dimensional Reduction  
Comparison across 14 parcellations and stacked predictions  
10 fold cross-validation - 5 shuffled iterations

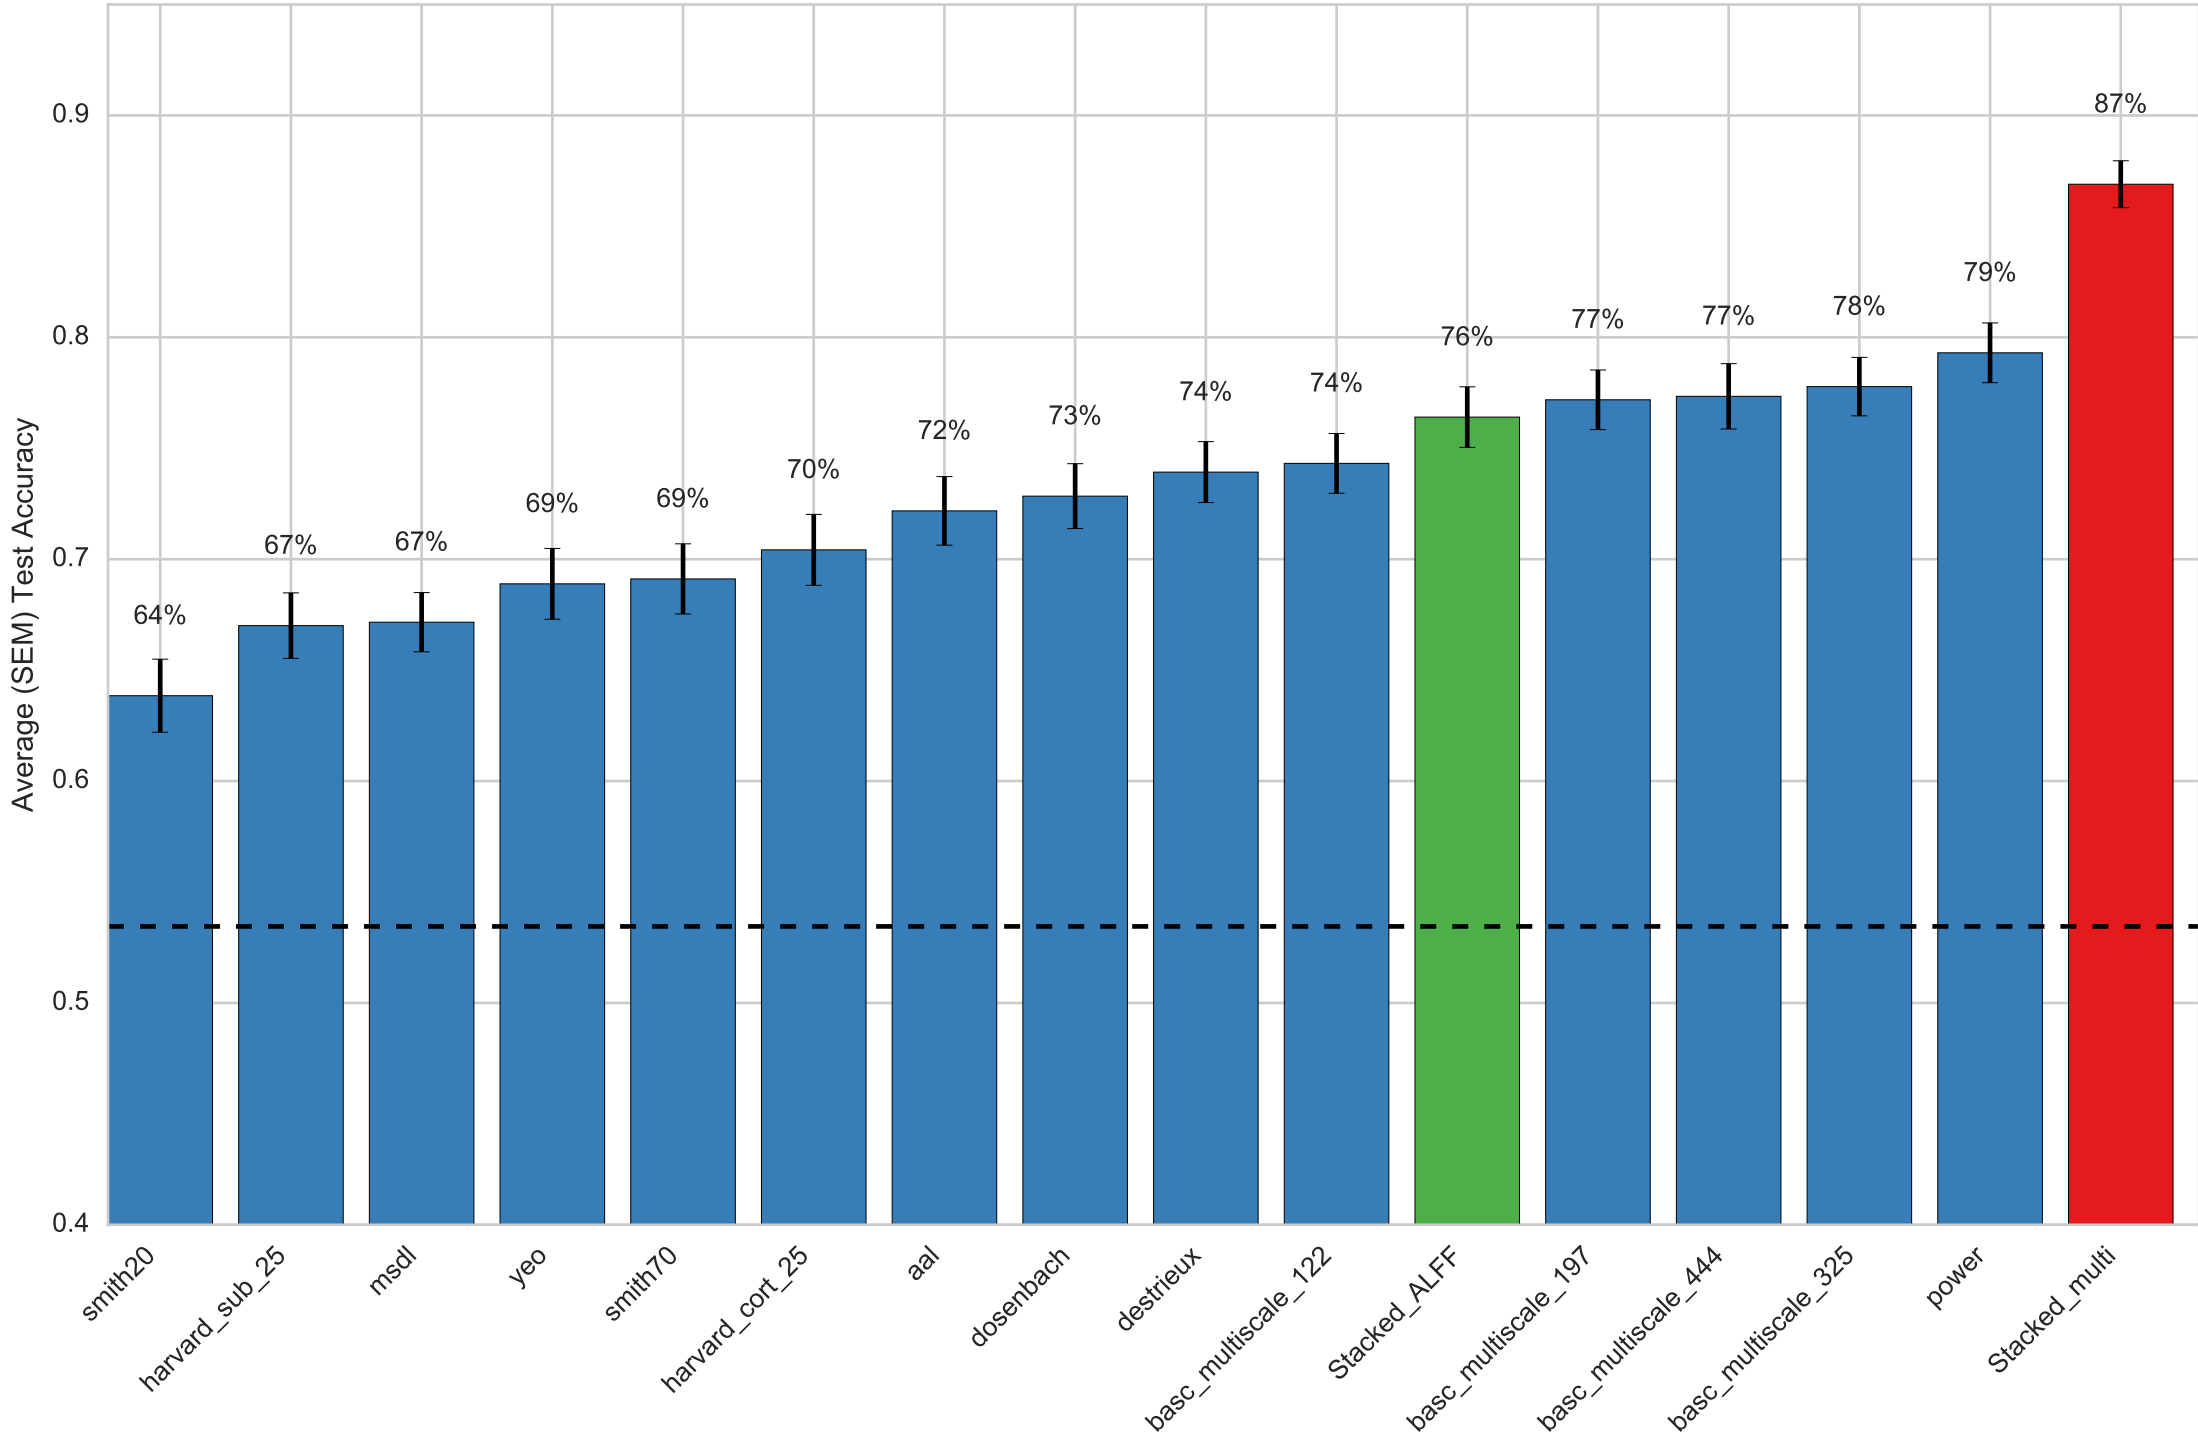

Feature selection / reduction method :Top 2% Feature Selection

fALFF : Top 2% Feature Selection  
Comparison across 14 parcellations and stacked predictions  
10 fold cross-validation - 5 shuffled iterations

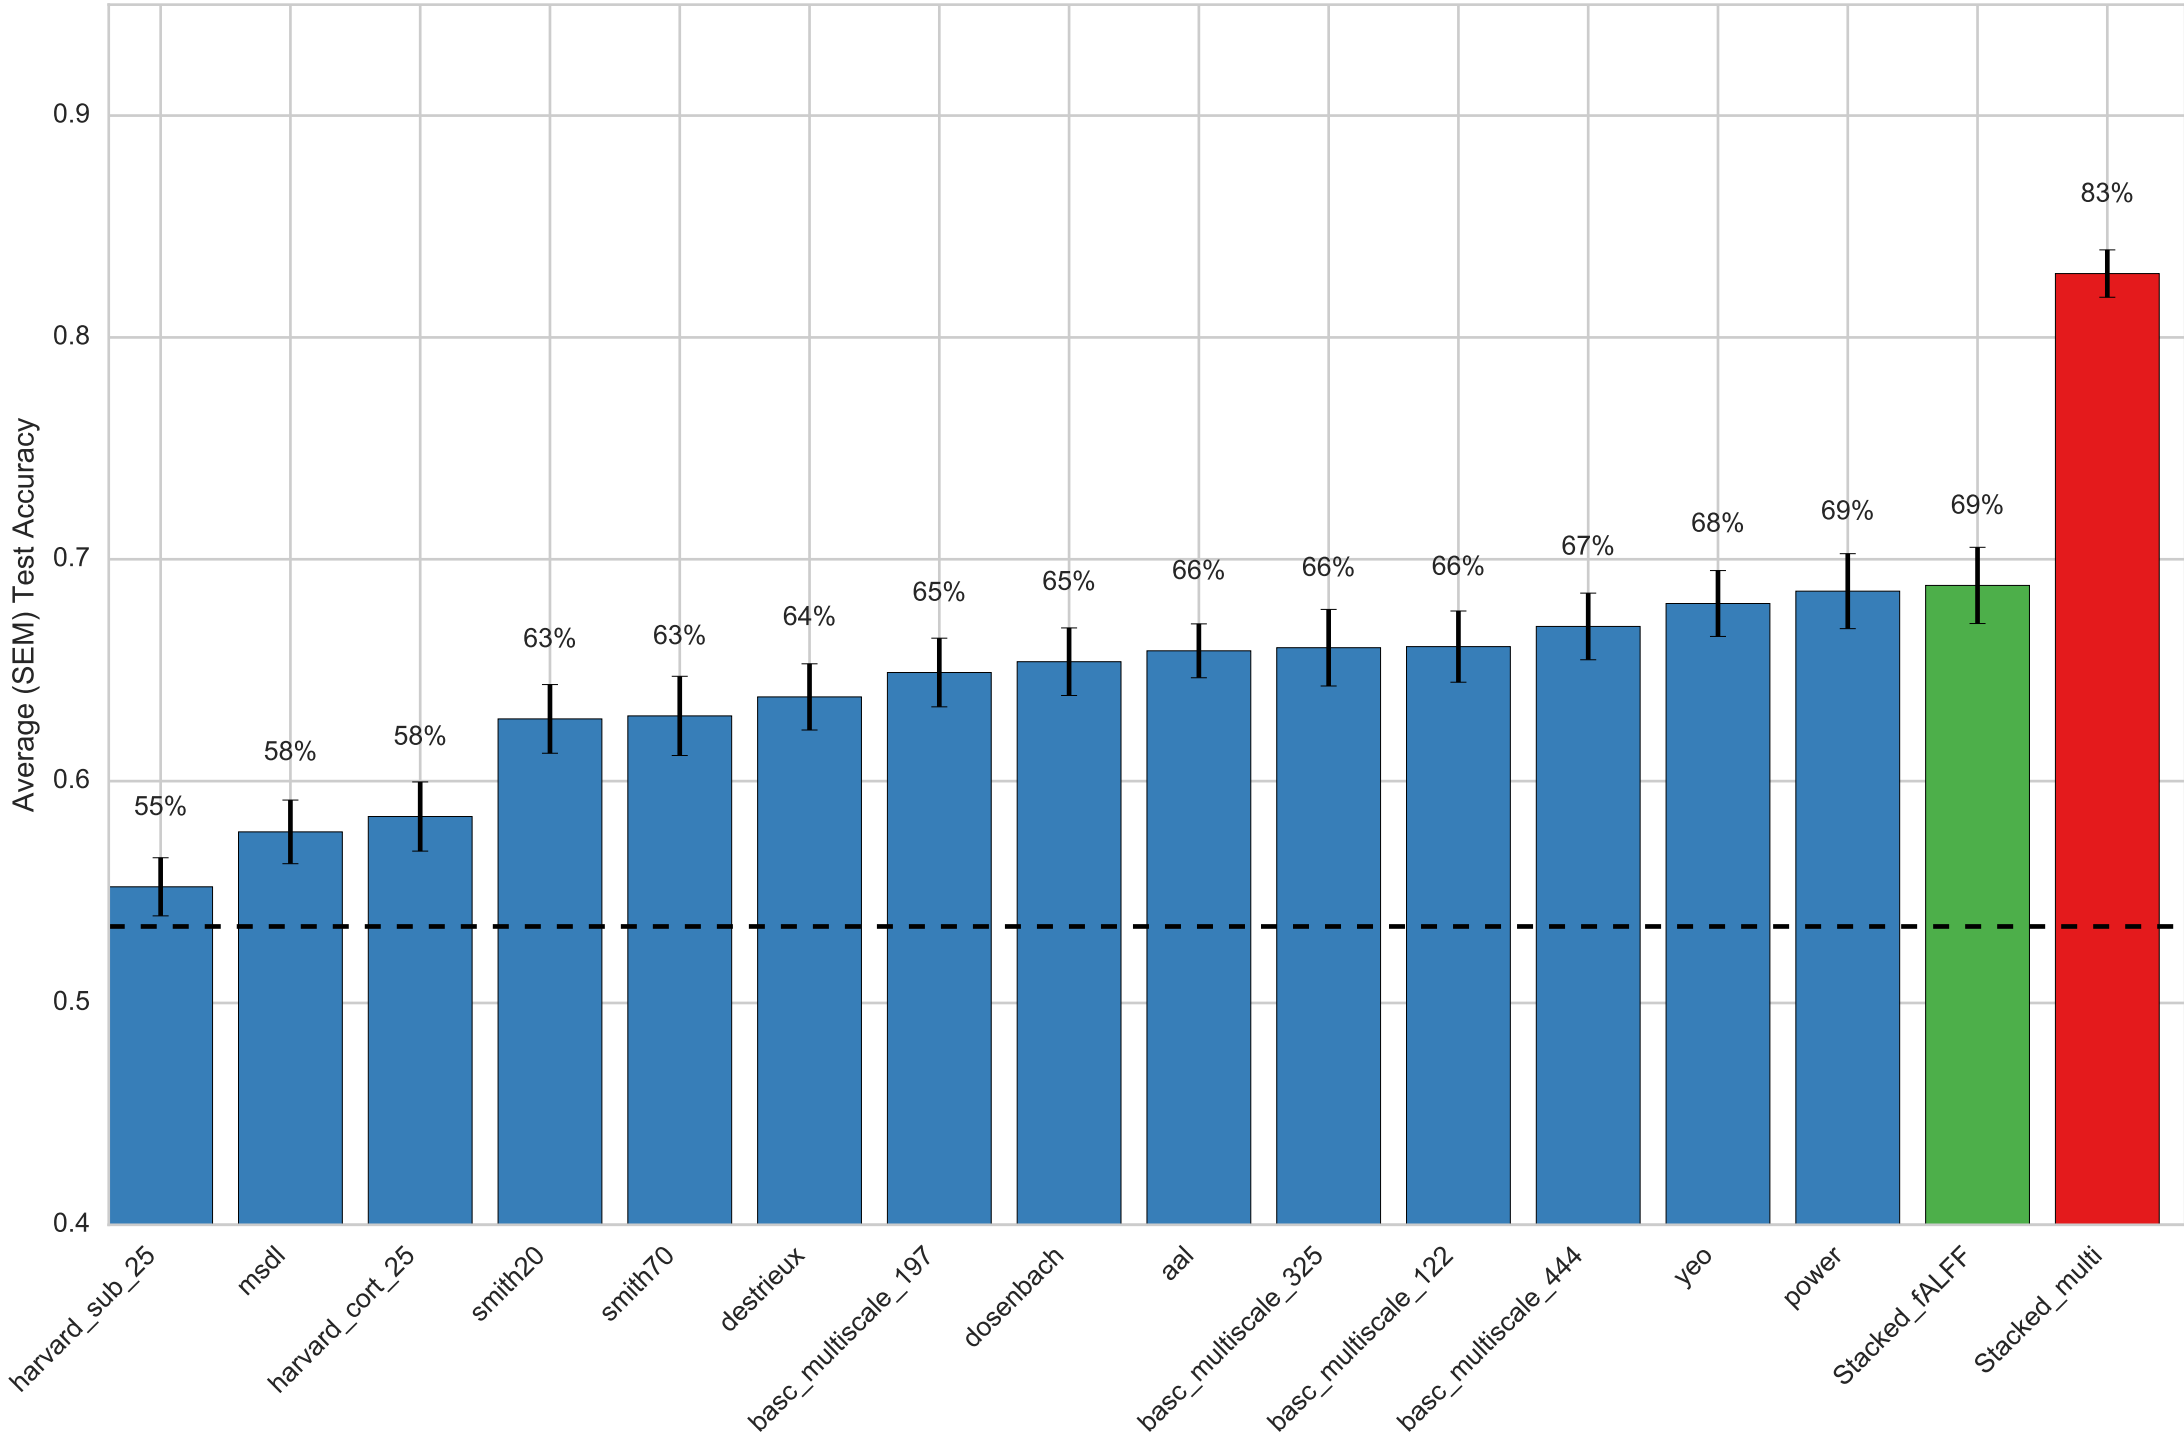

FC\_corr : Top 2% Feature Selection  
Comparison across 14 parcellations and stacked predictions  
10 fold cross-validation - 5 shuffled iterations

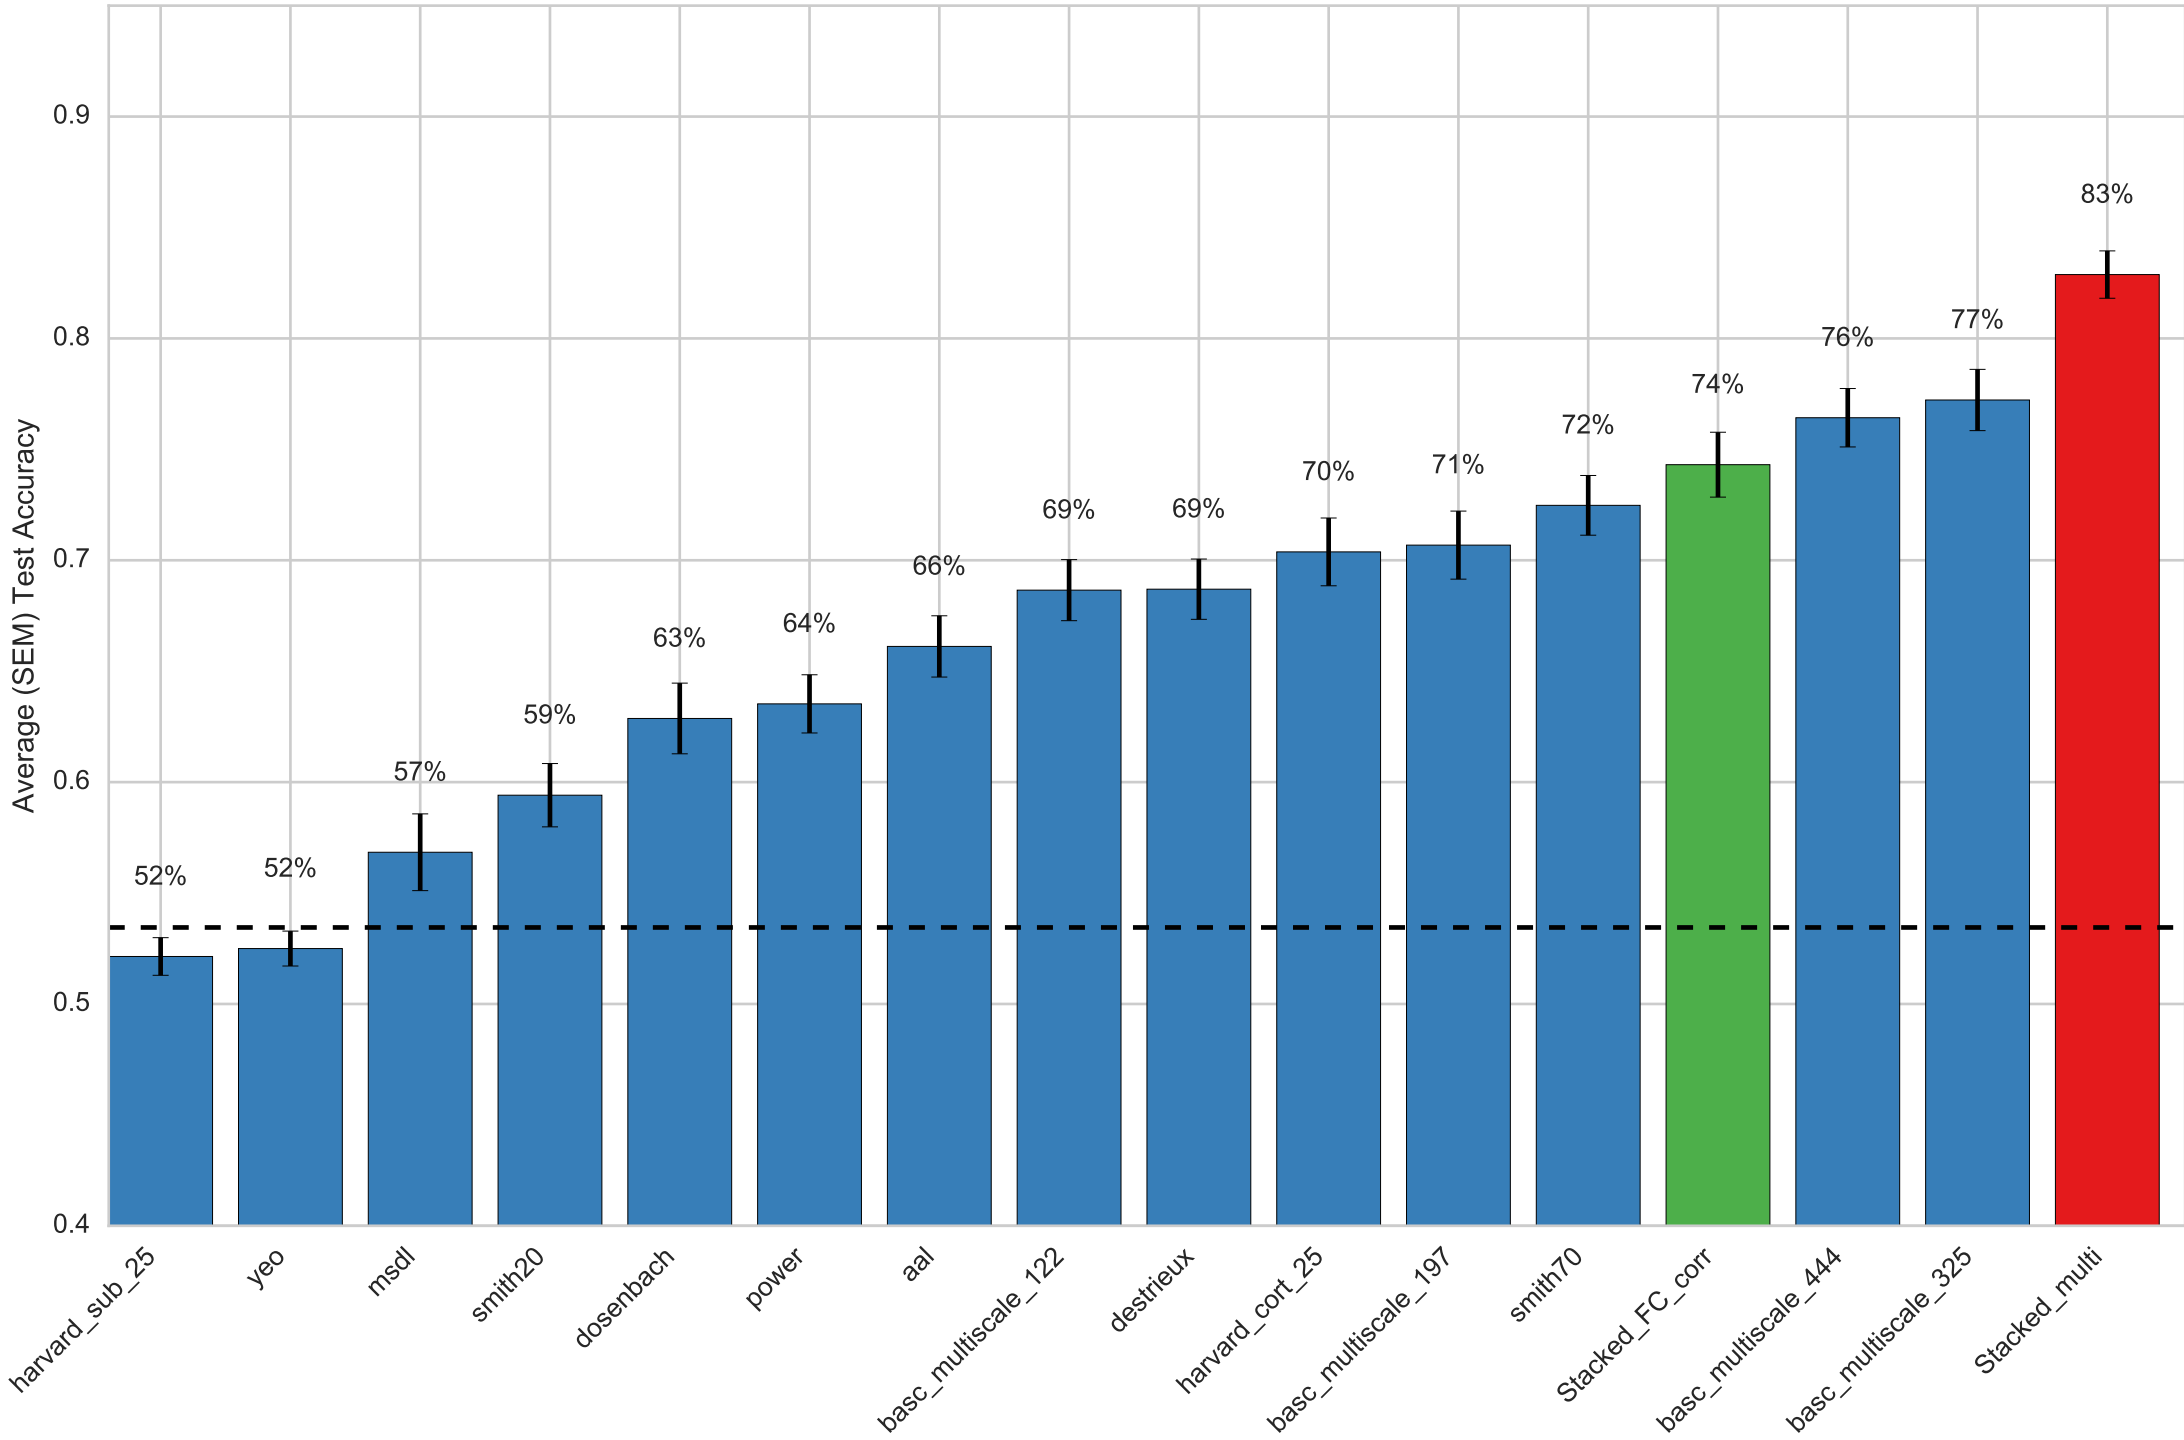



FC\_part : Top 2% Feature Selection  
Comparison across 14 parcellations and stacked predictions  
10 fold cross-validation - 5 shuffled iterations

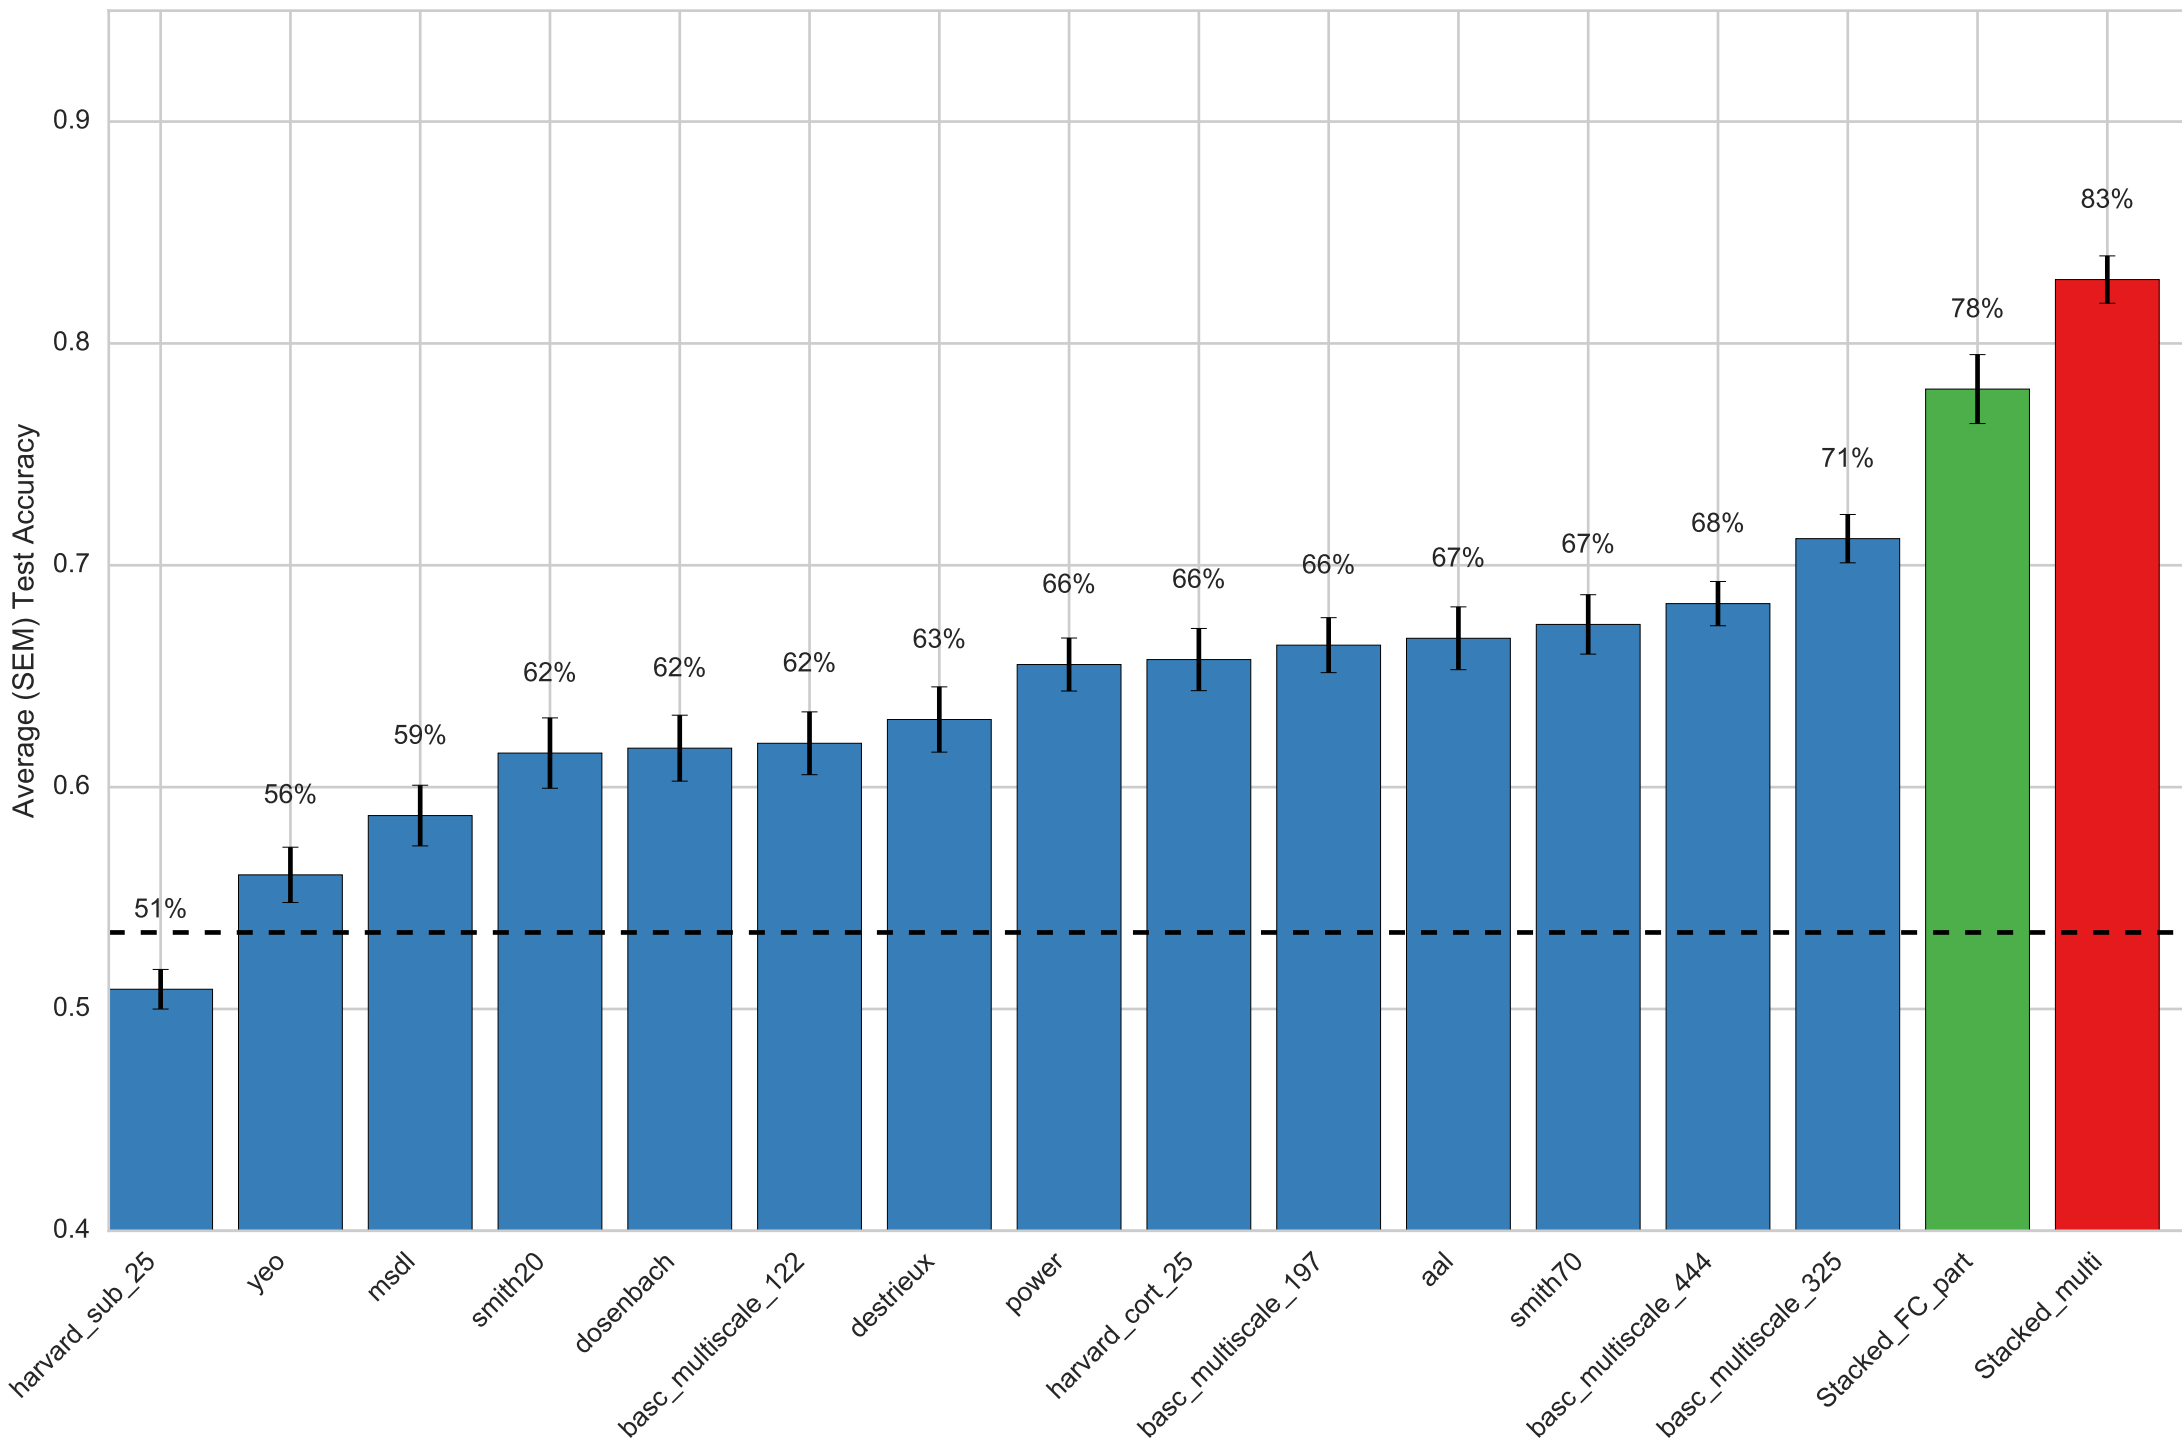

FC\_prec : Top 2% Feature Selection  
Comparison across 14 parcellations and stacked predictions  
10 fold cross-validation - 5 shuffled iterations

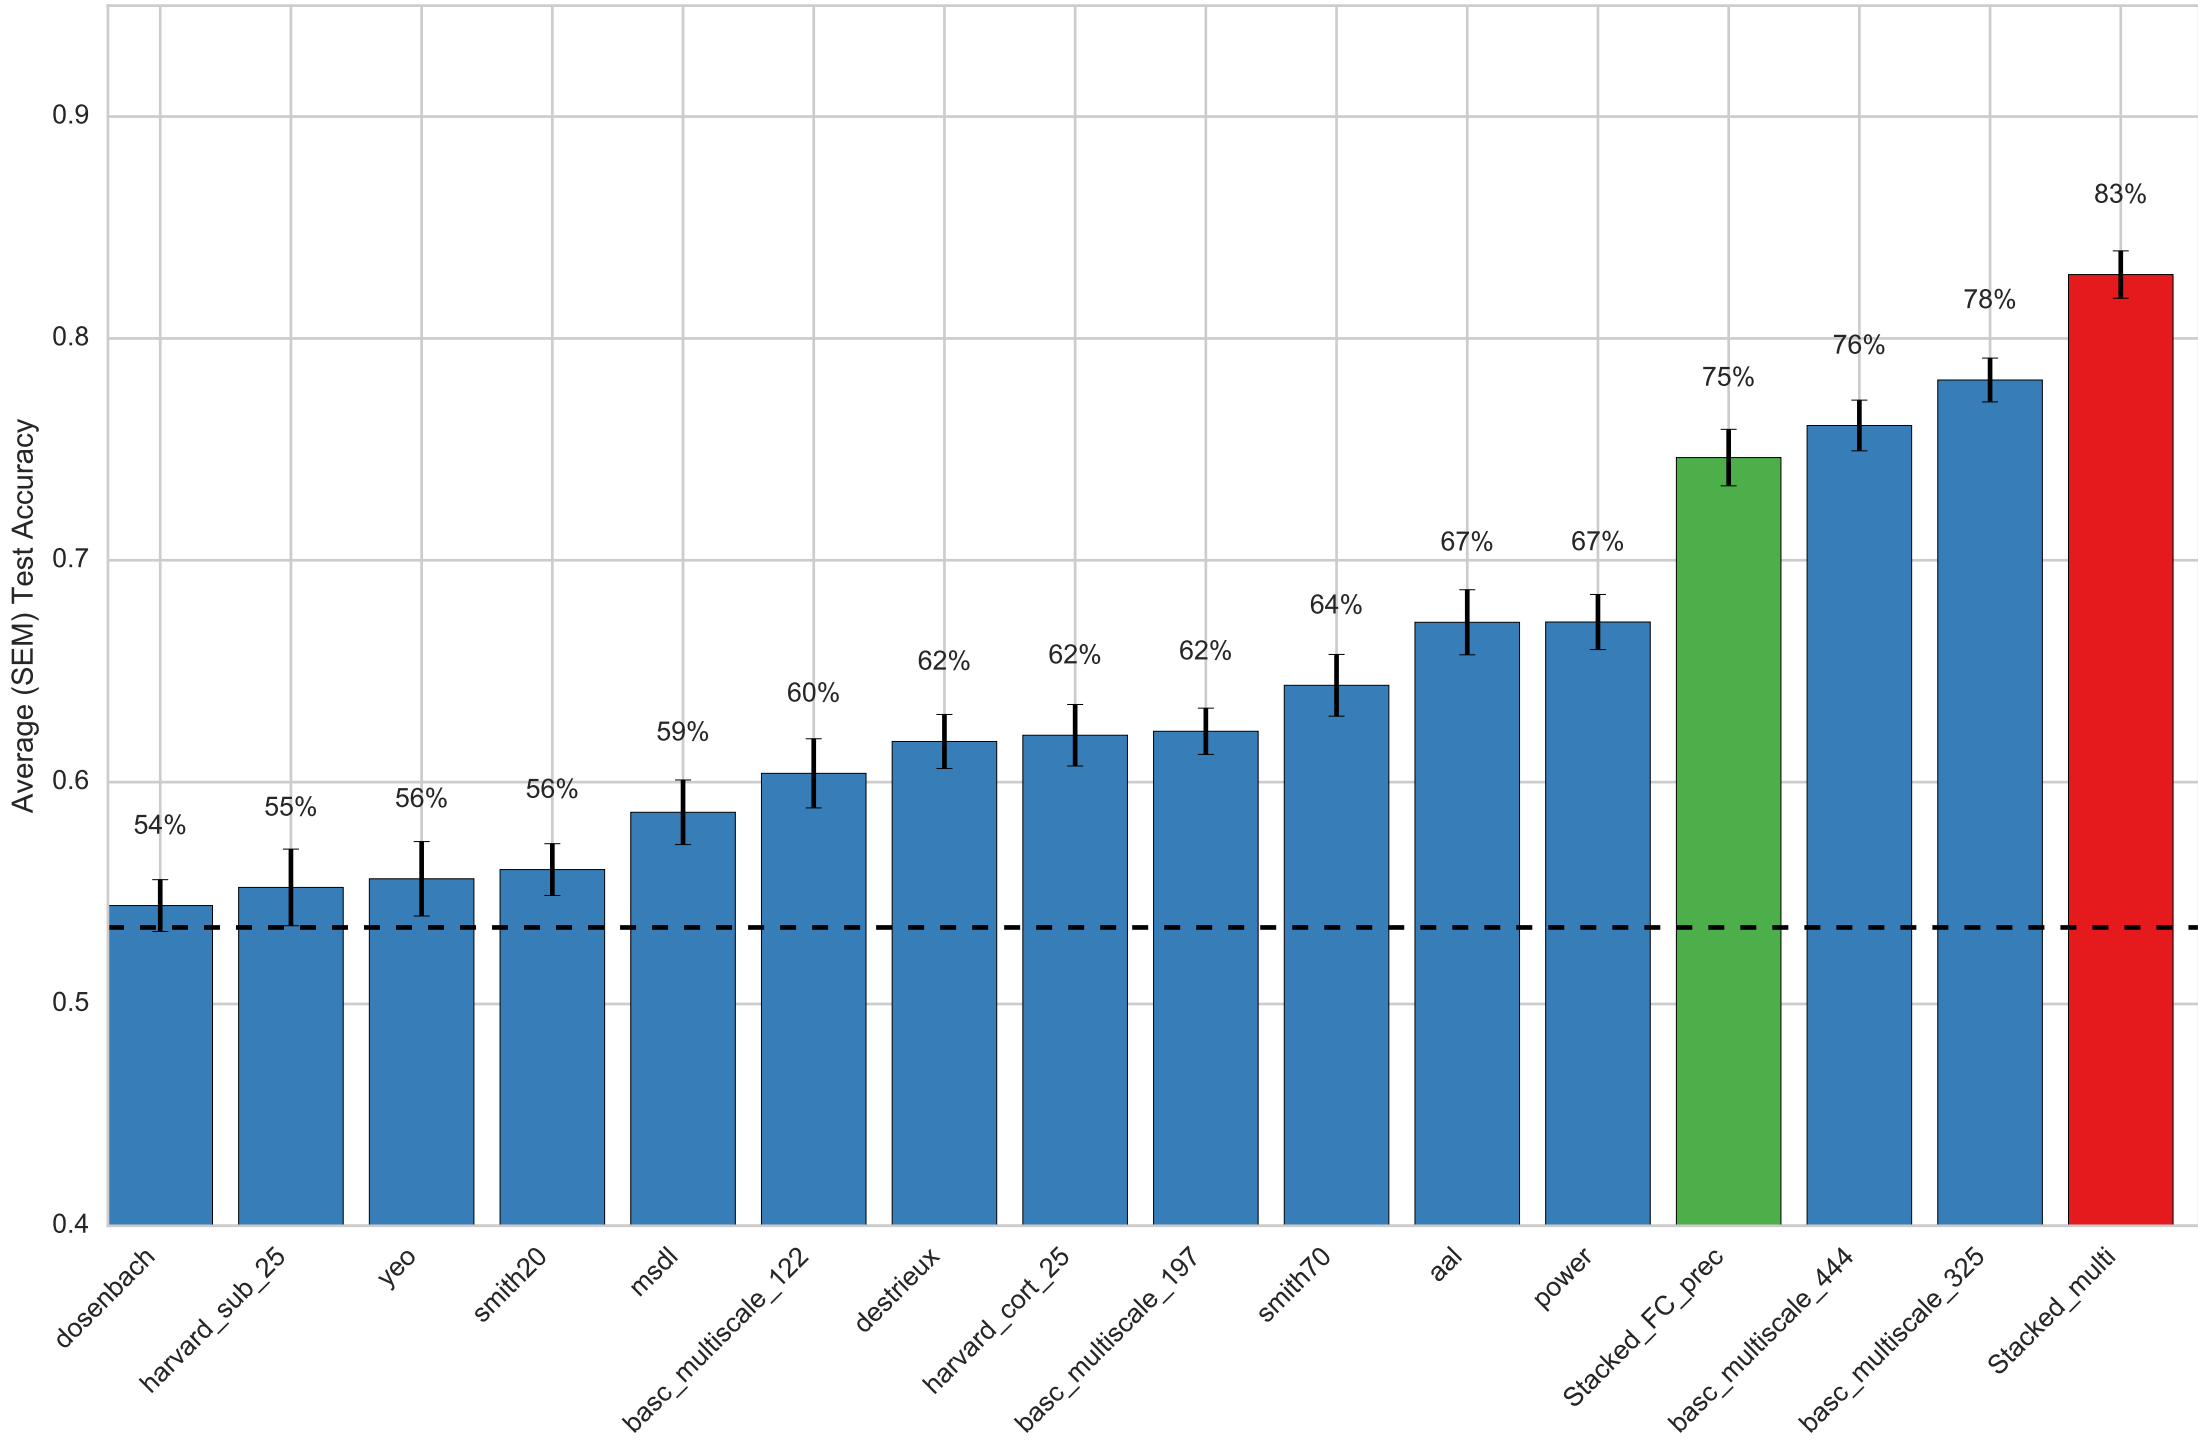

ReHo : Top 2% Feature Selection  
Comparison across 14 parcellations and stacked predictions  
10 fold cross-validation - 5 shuffled iterations

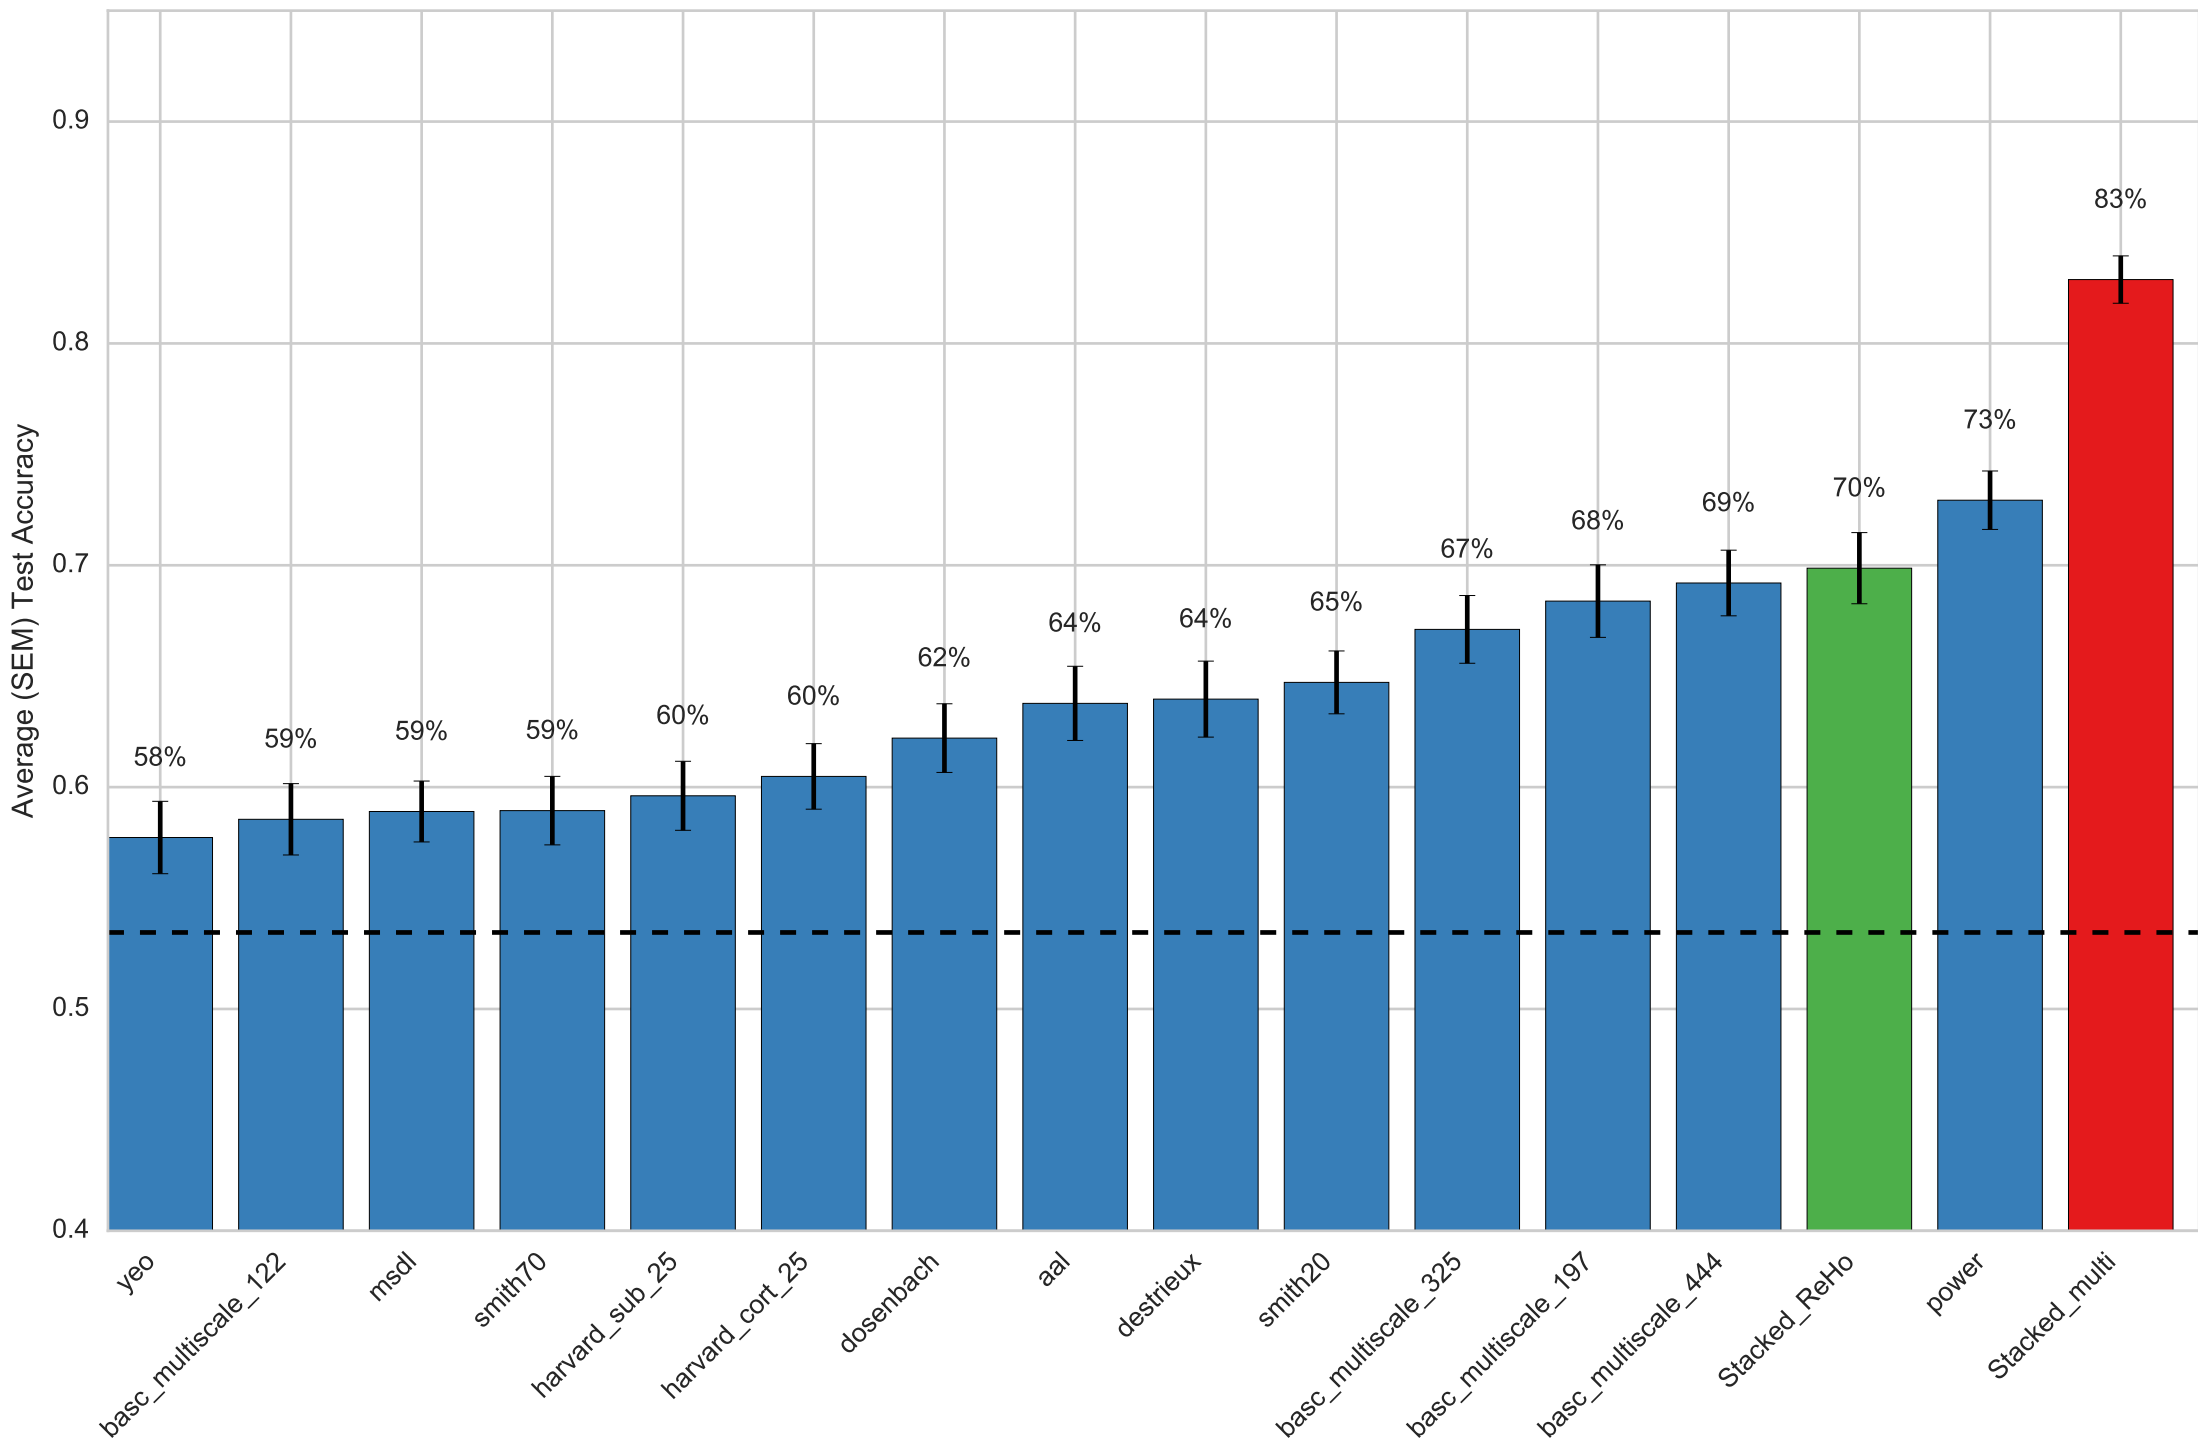

ALFF : Top 2% Feature Selection  
Comparison across 14 parcellations and stacked predictions  
10 fold cross-validation - 5 shuffled iterations

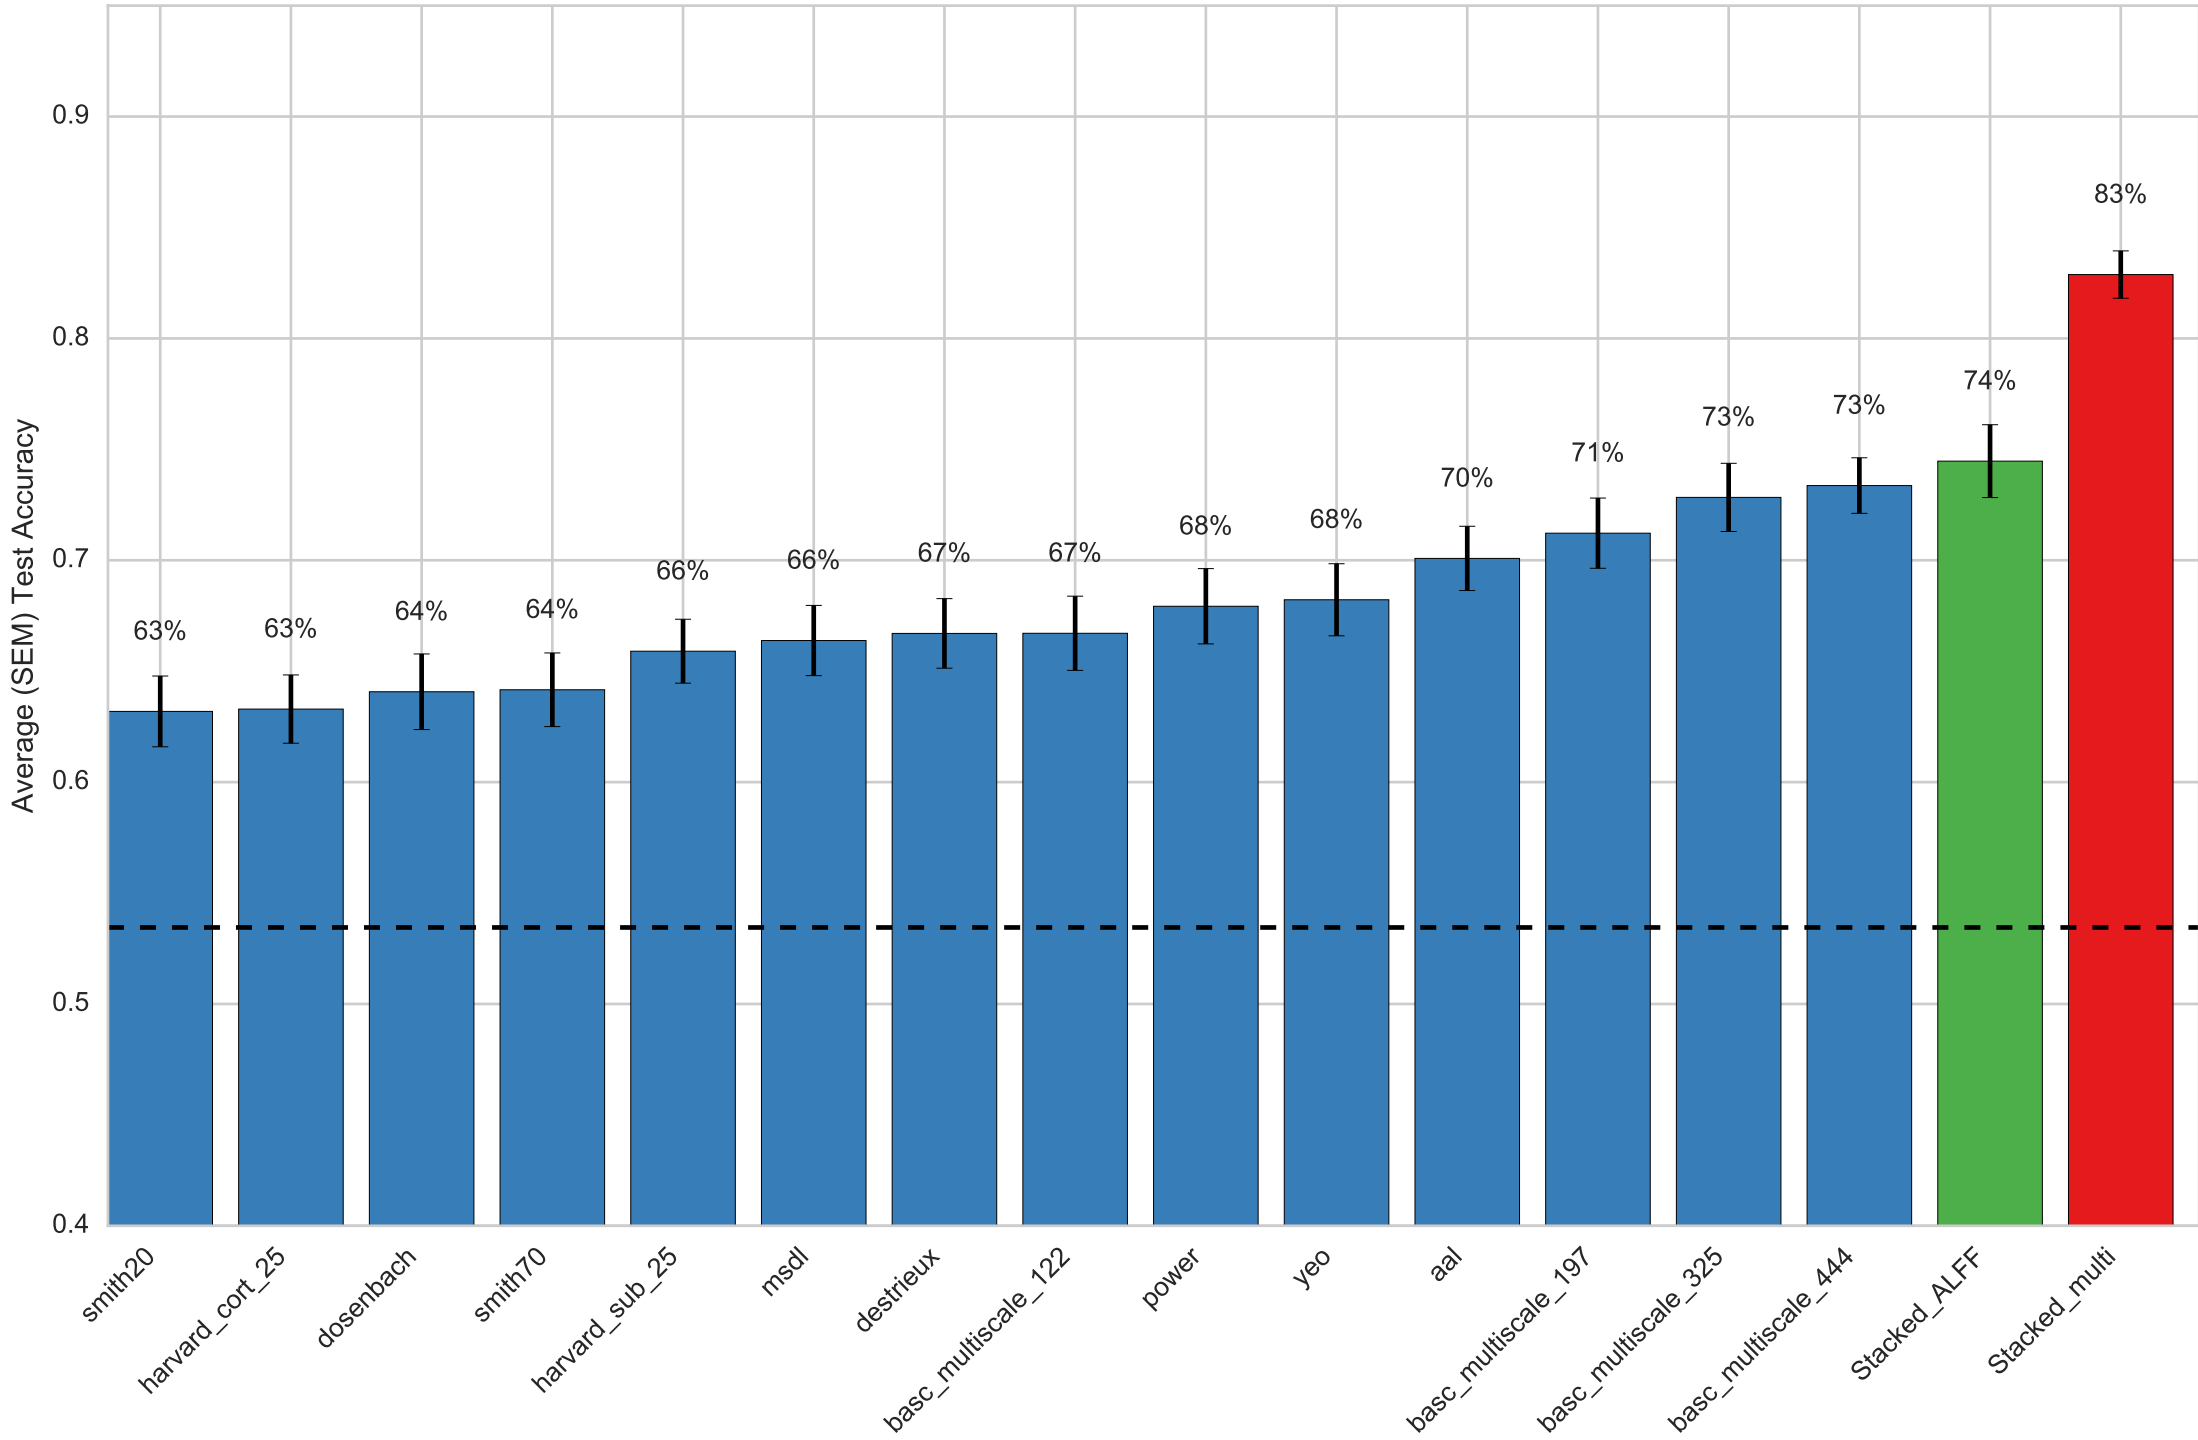

Feature selection / reduction method :Top 5% Feature Selection

fALFF : Top 5% Feature Selection  
Comparison across 14 parcellations and stacked predictions  
10 fold cross-validation - 5 shuffled iterations

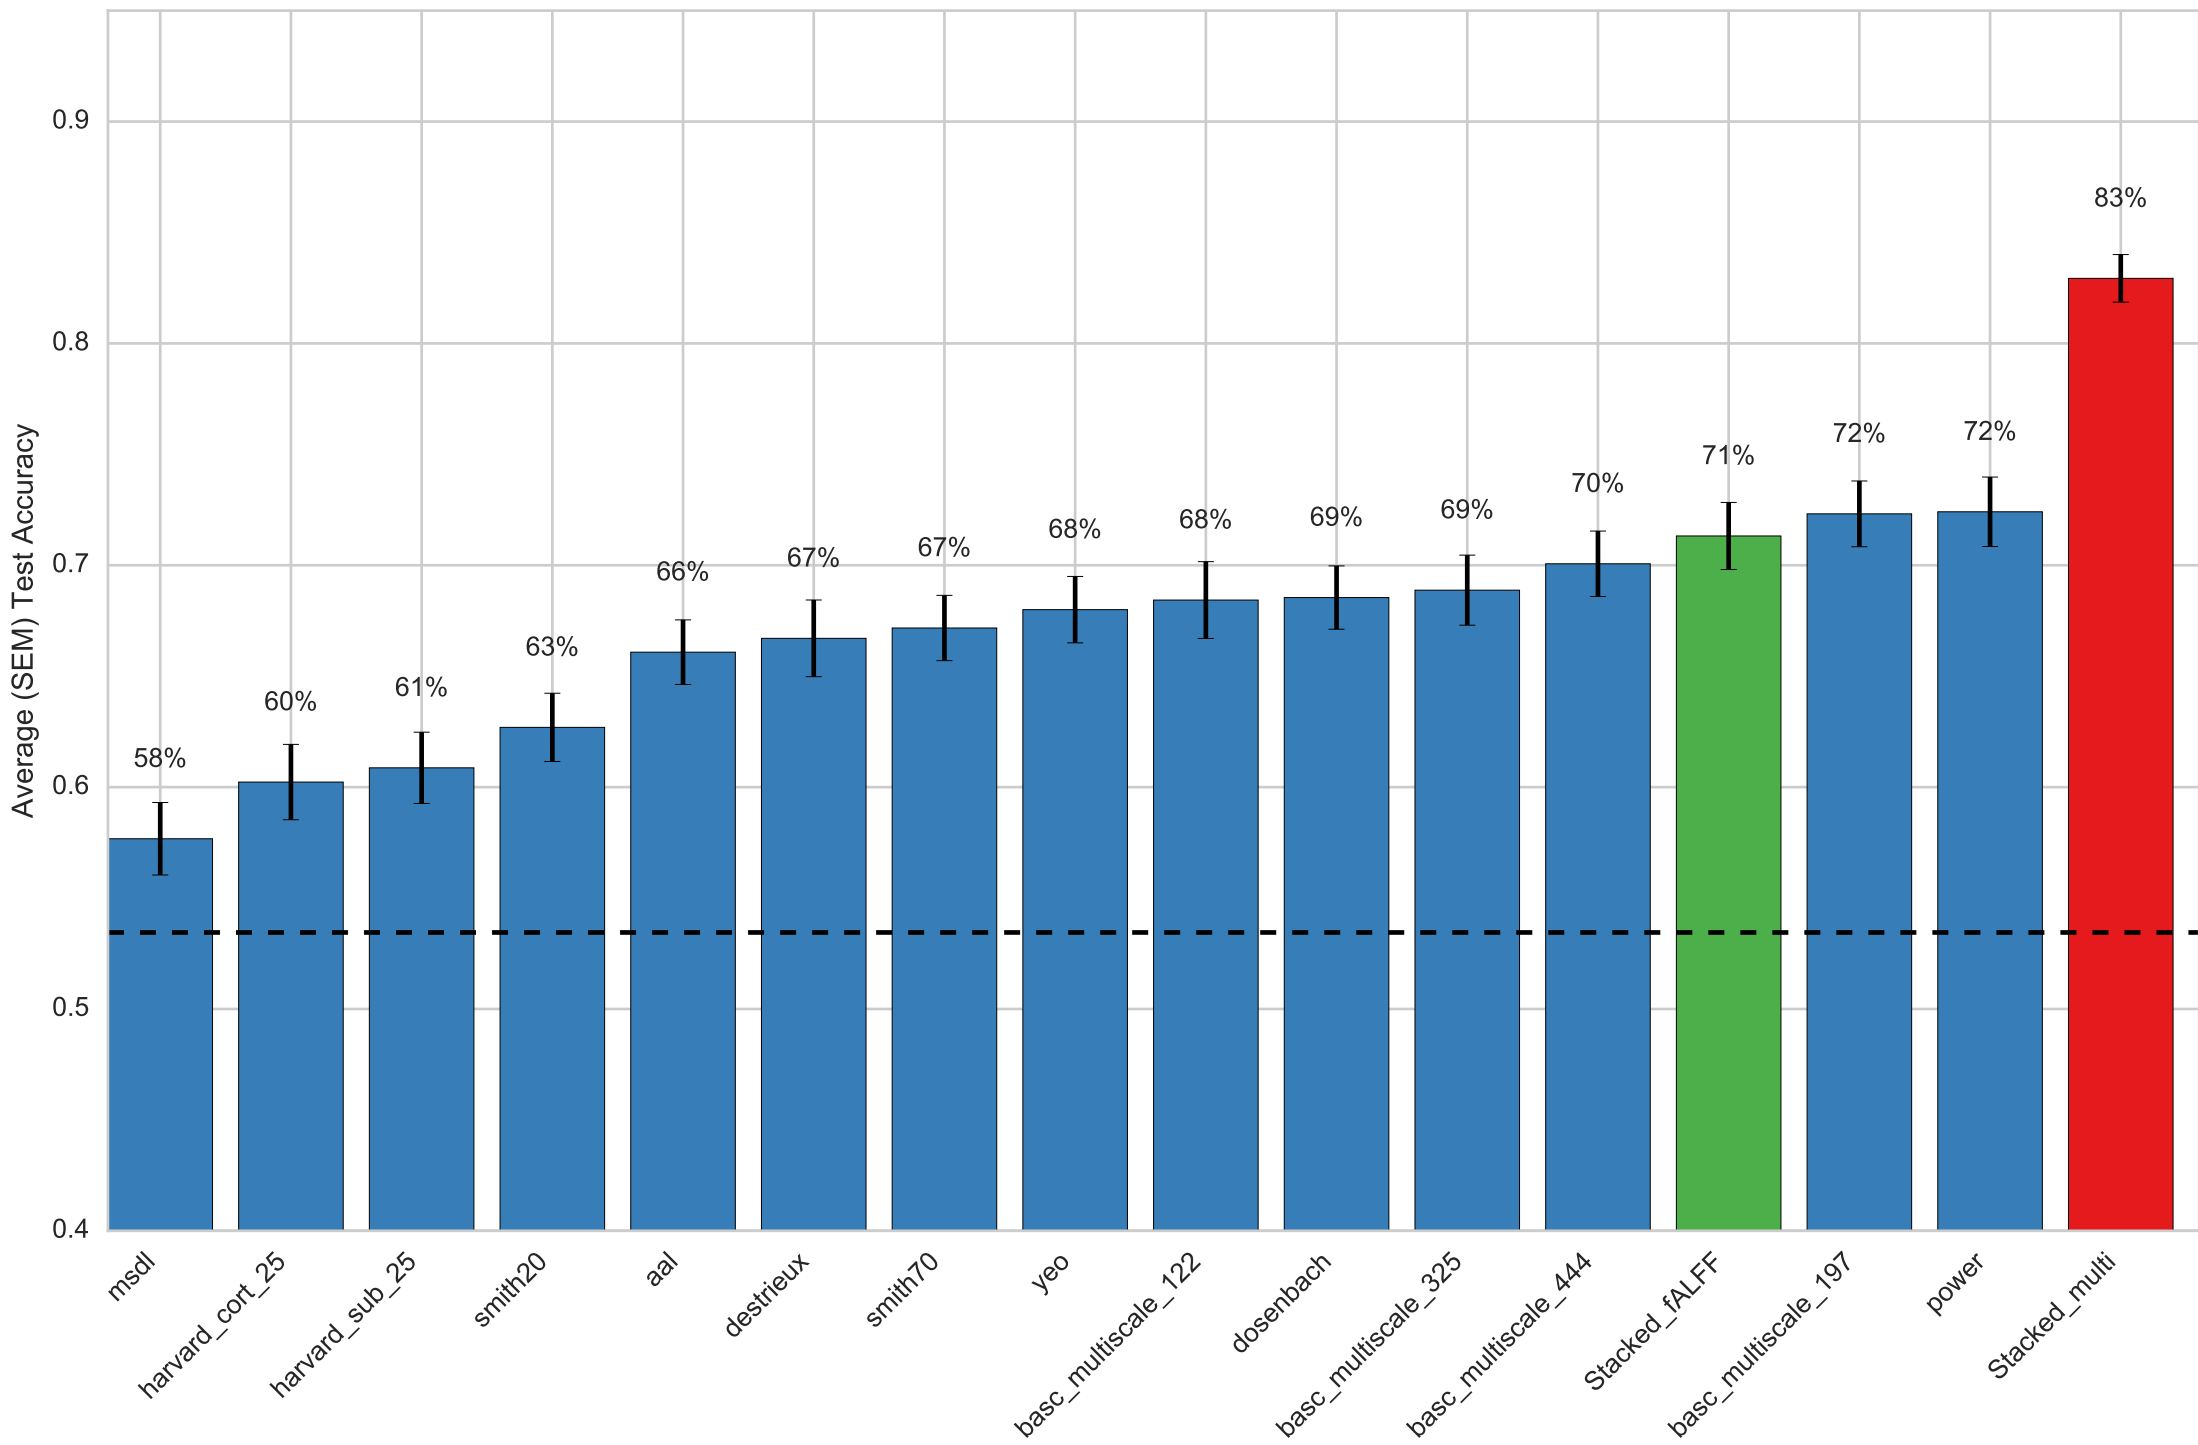

FC\_corr : Top 5% Feature Selection  
Comparison across 14 parcellations and stacked predictions  
10 fold cross-validation - 5 shuffled iterations

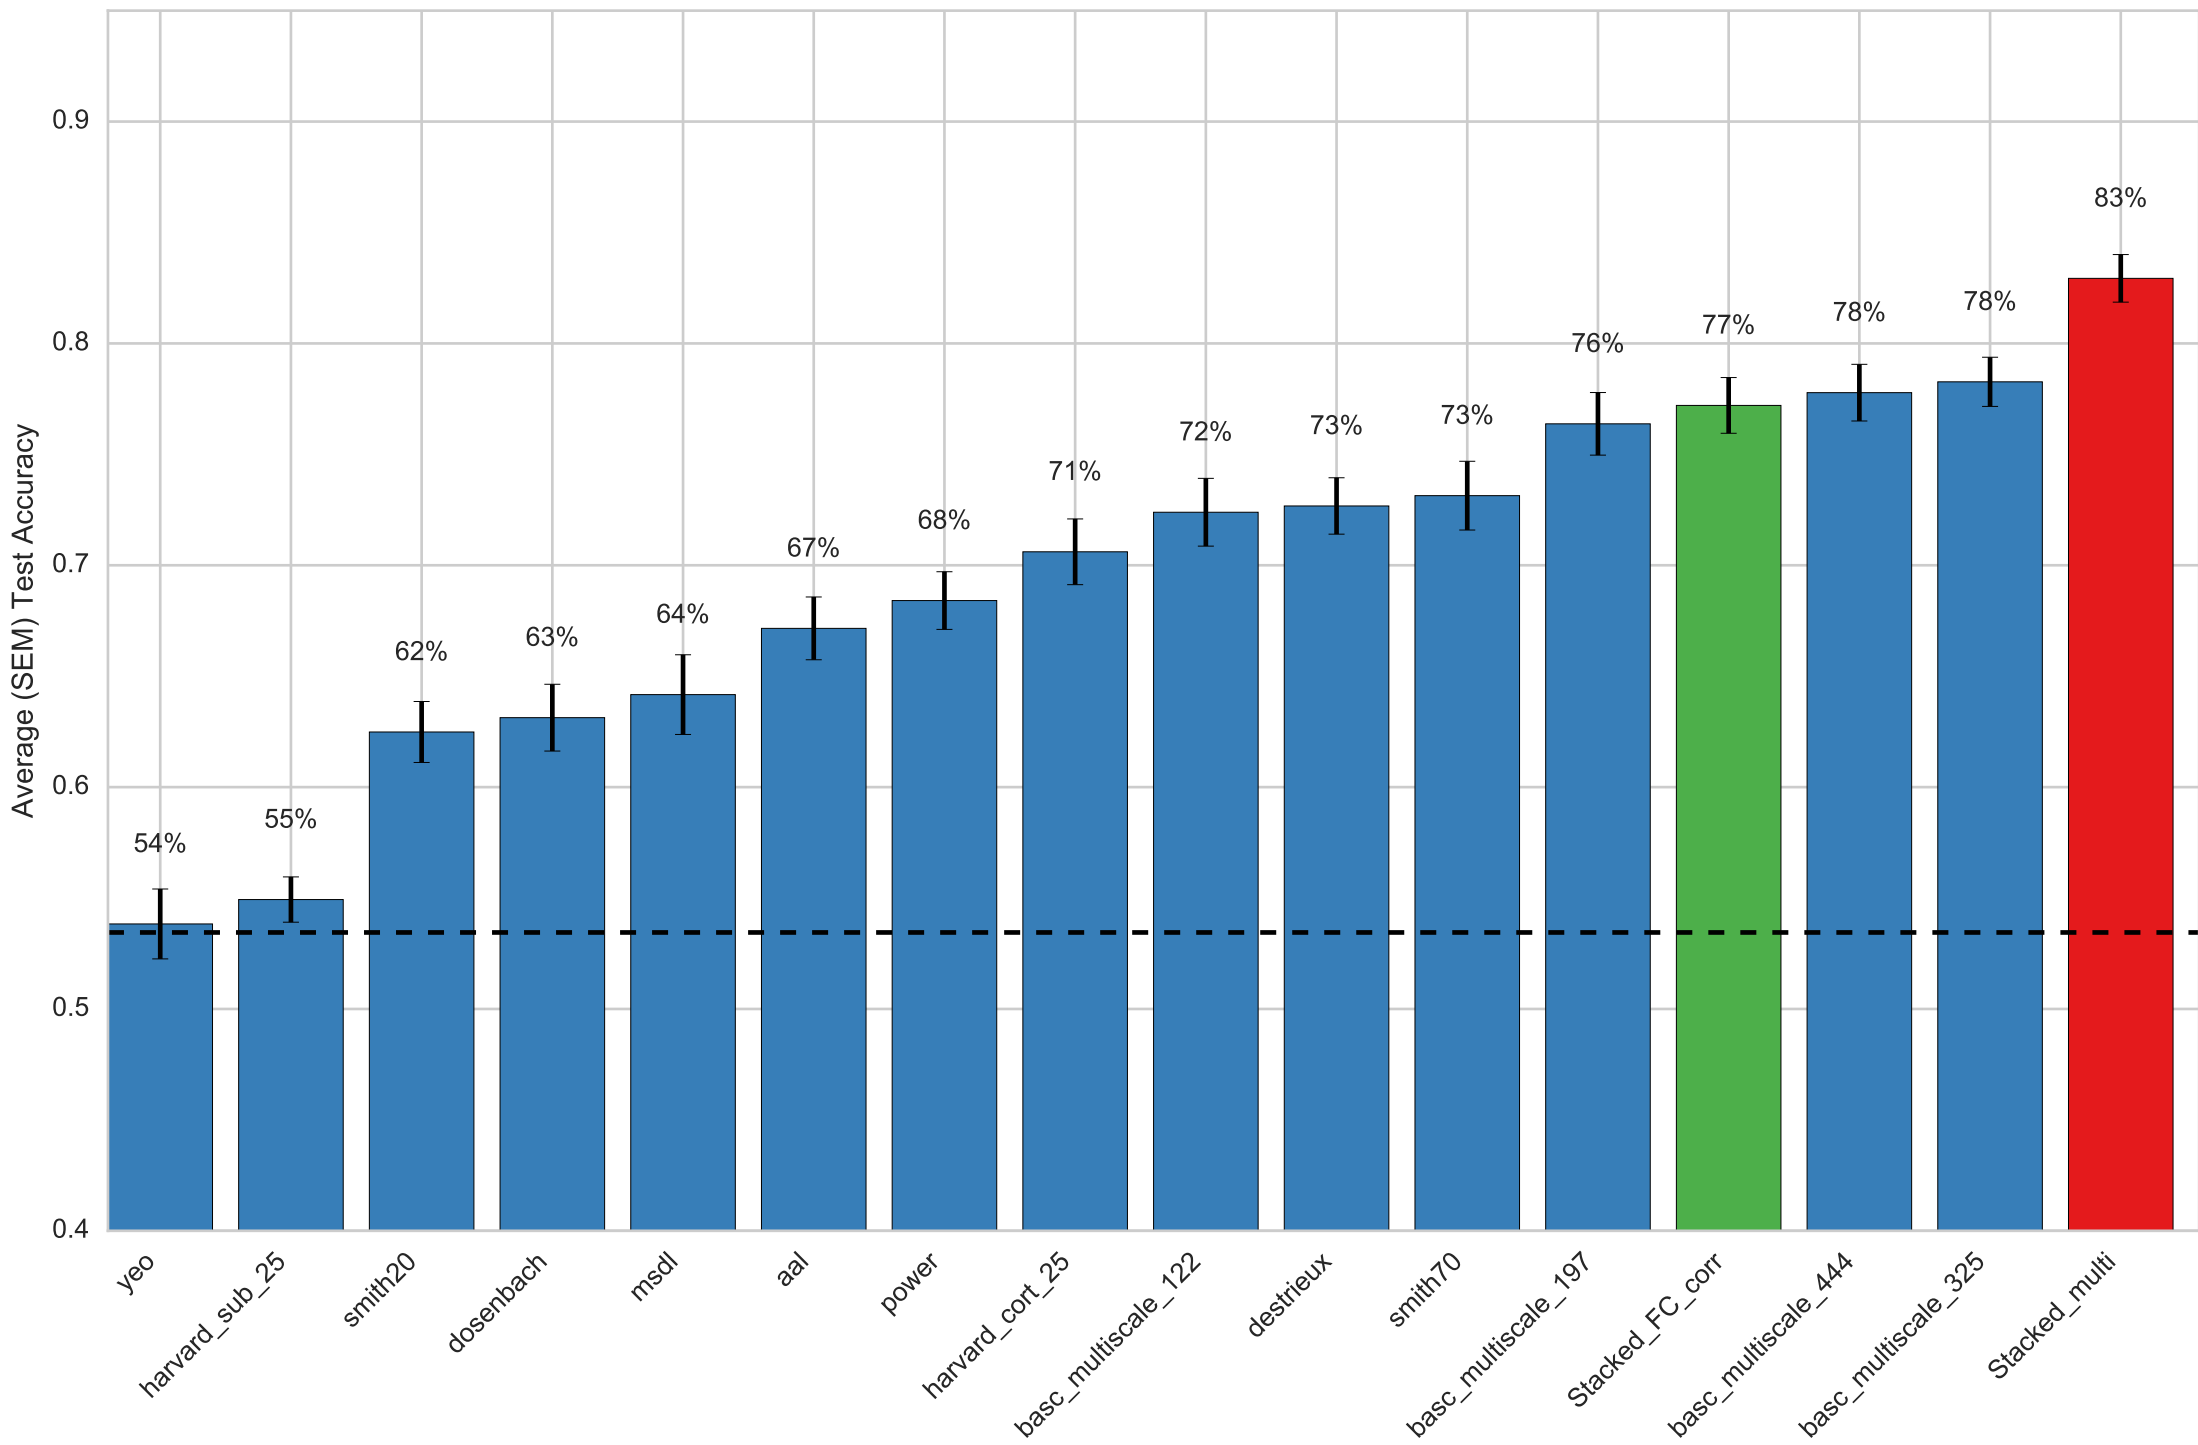

FC\_part : Top 5% Feature Selection  
Comparison across 14 parcellations and stacked predictions  
10 fold cross-validation - 5 shuffled iterations

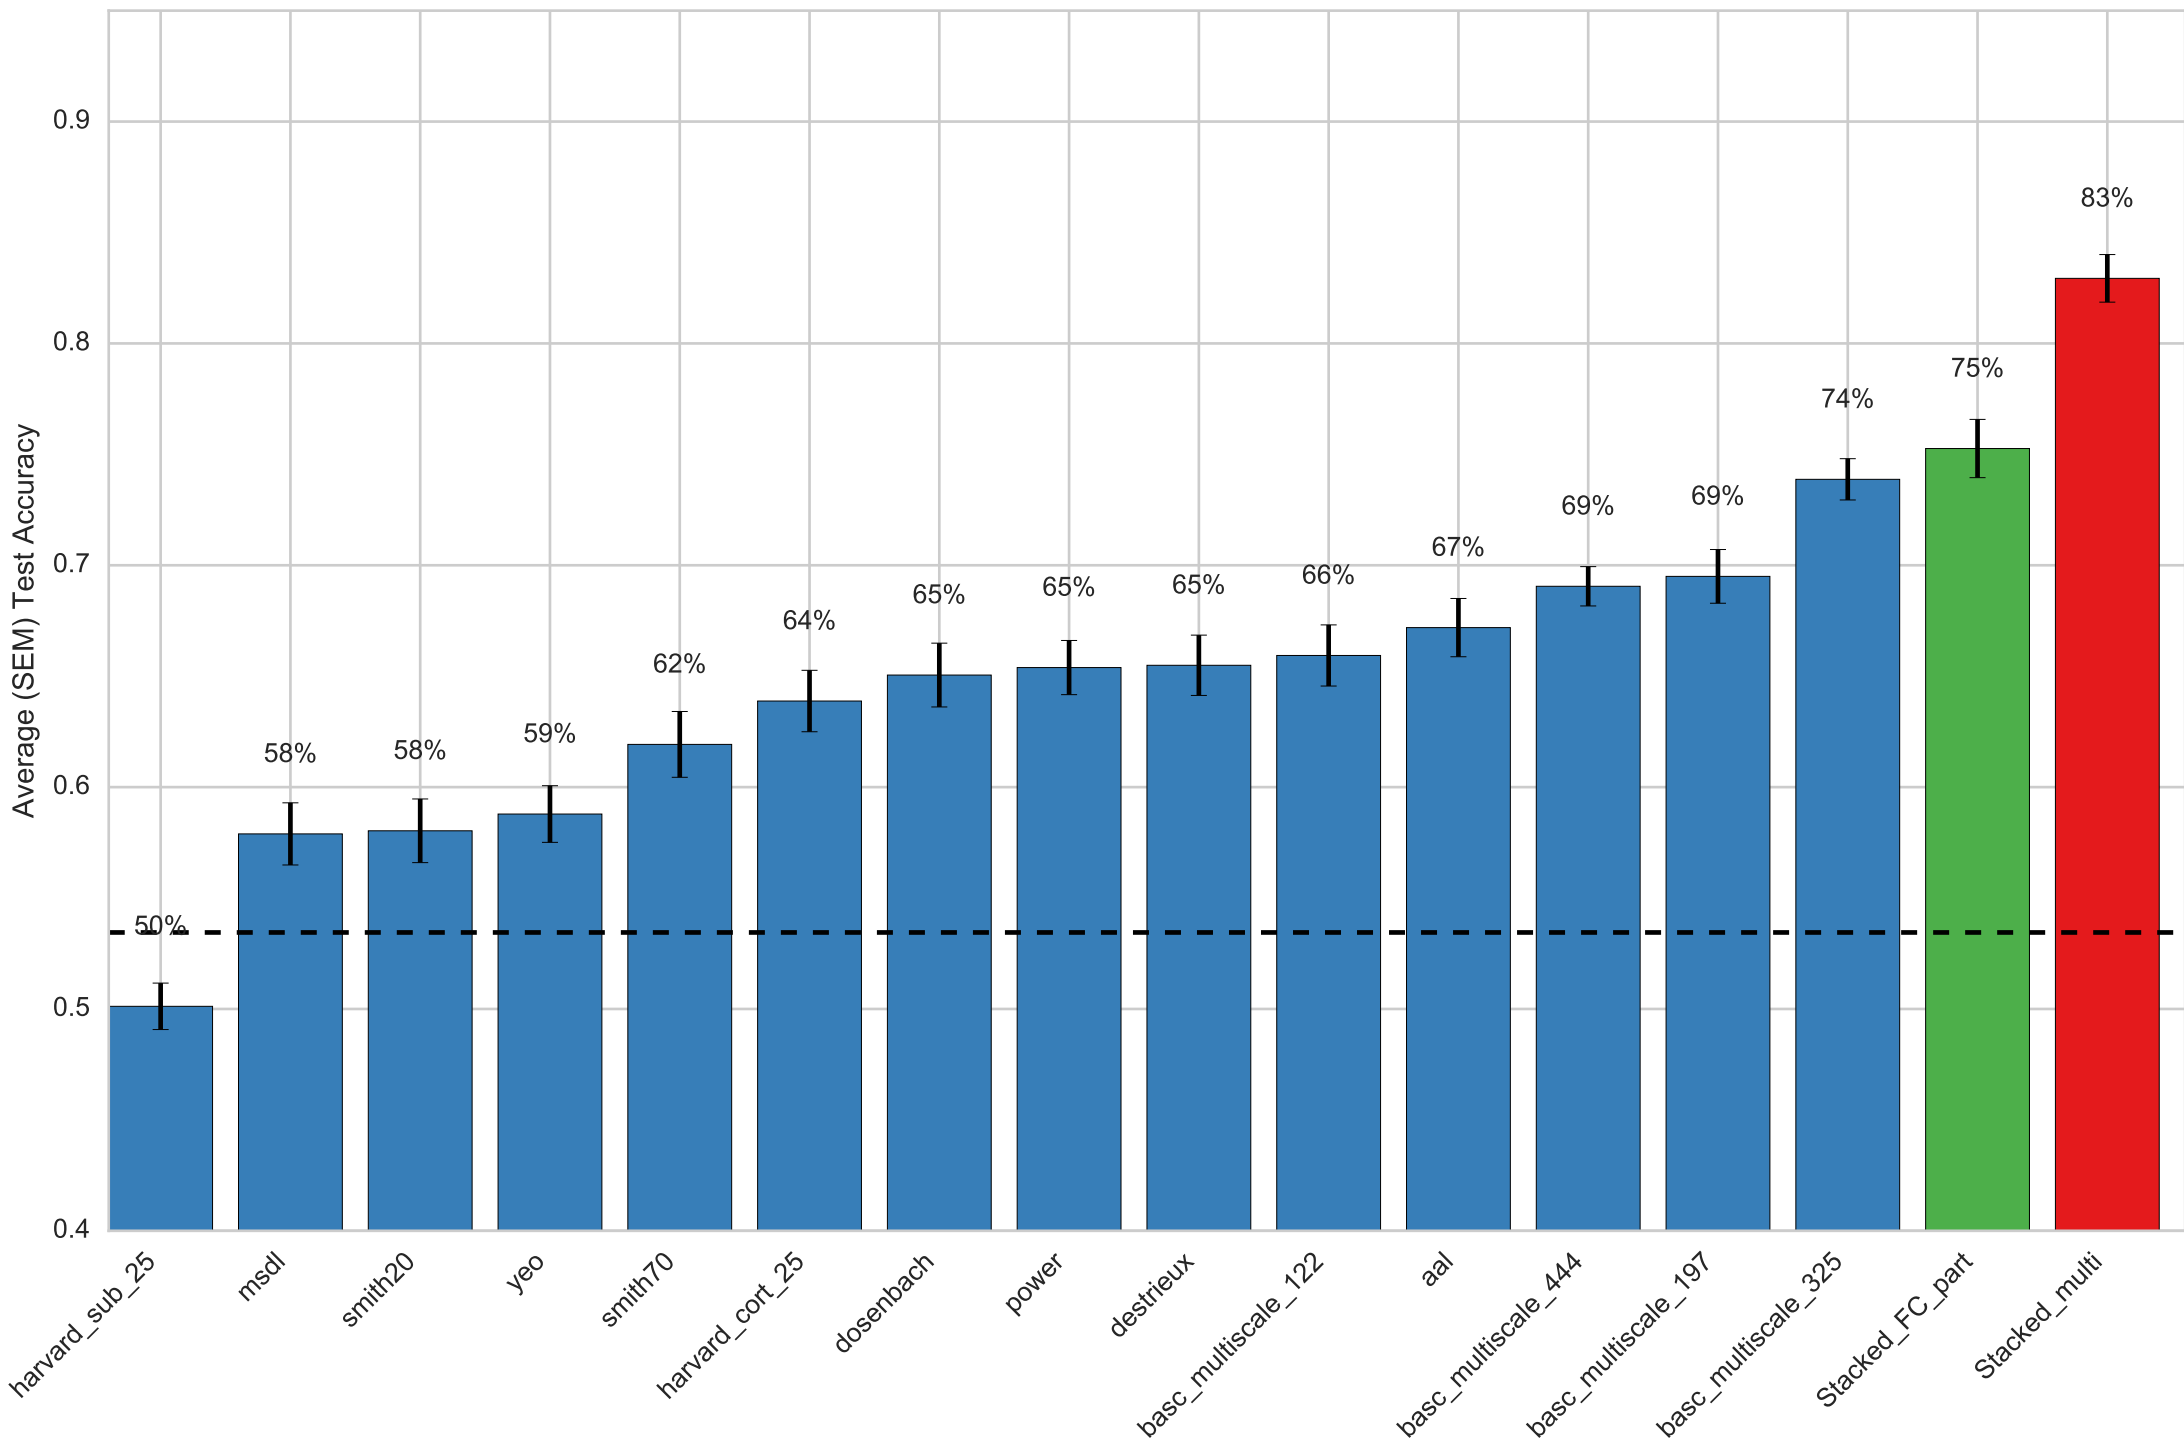



FC\_prec : Top 5% Feature Selection  
Comparison across 14 parcellations and stacked predictions  
10 fold cross-validation - 5 shuffled iterations

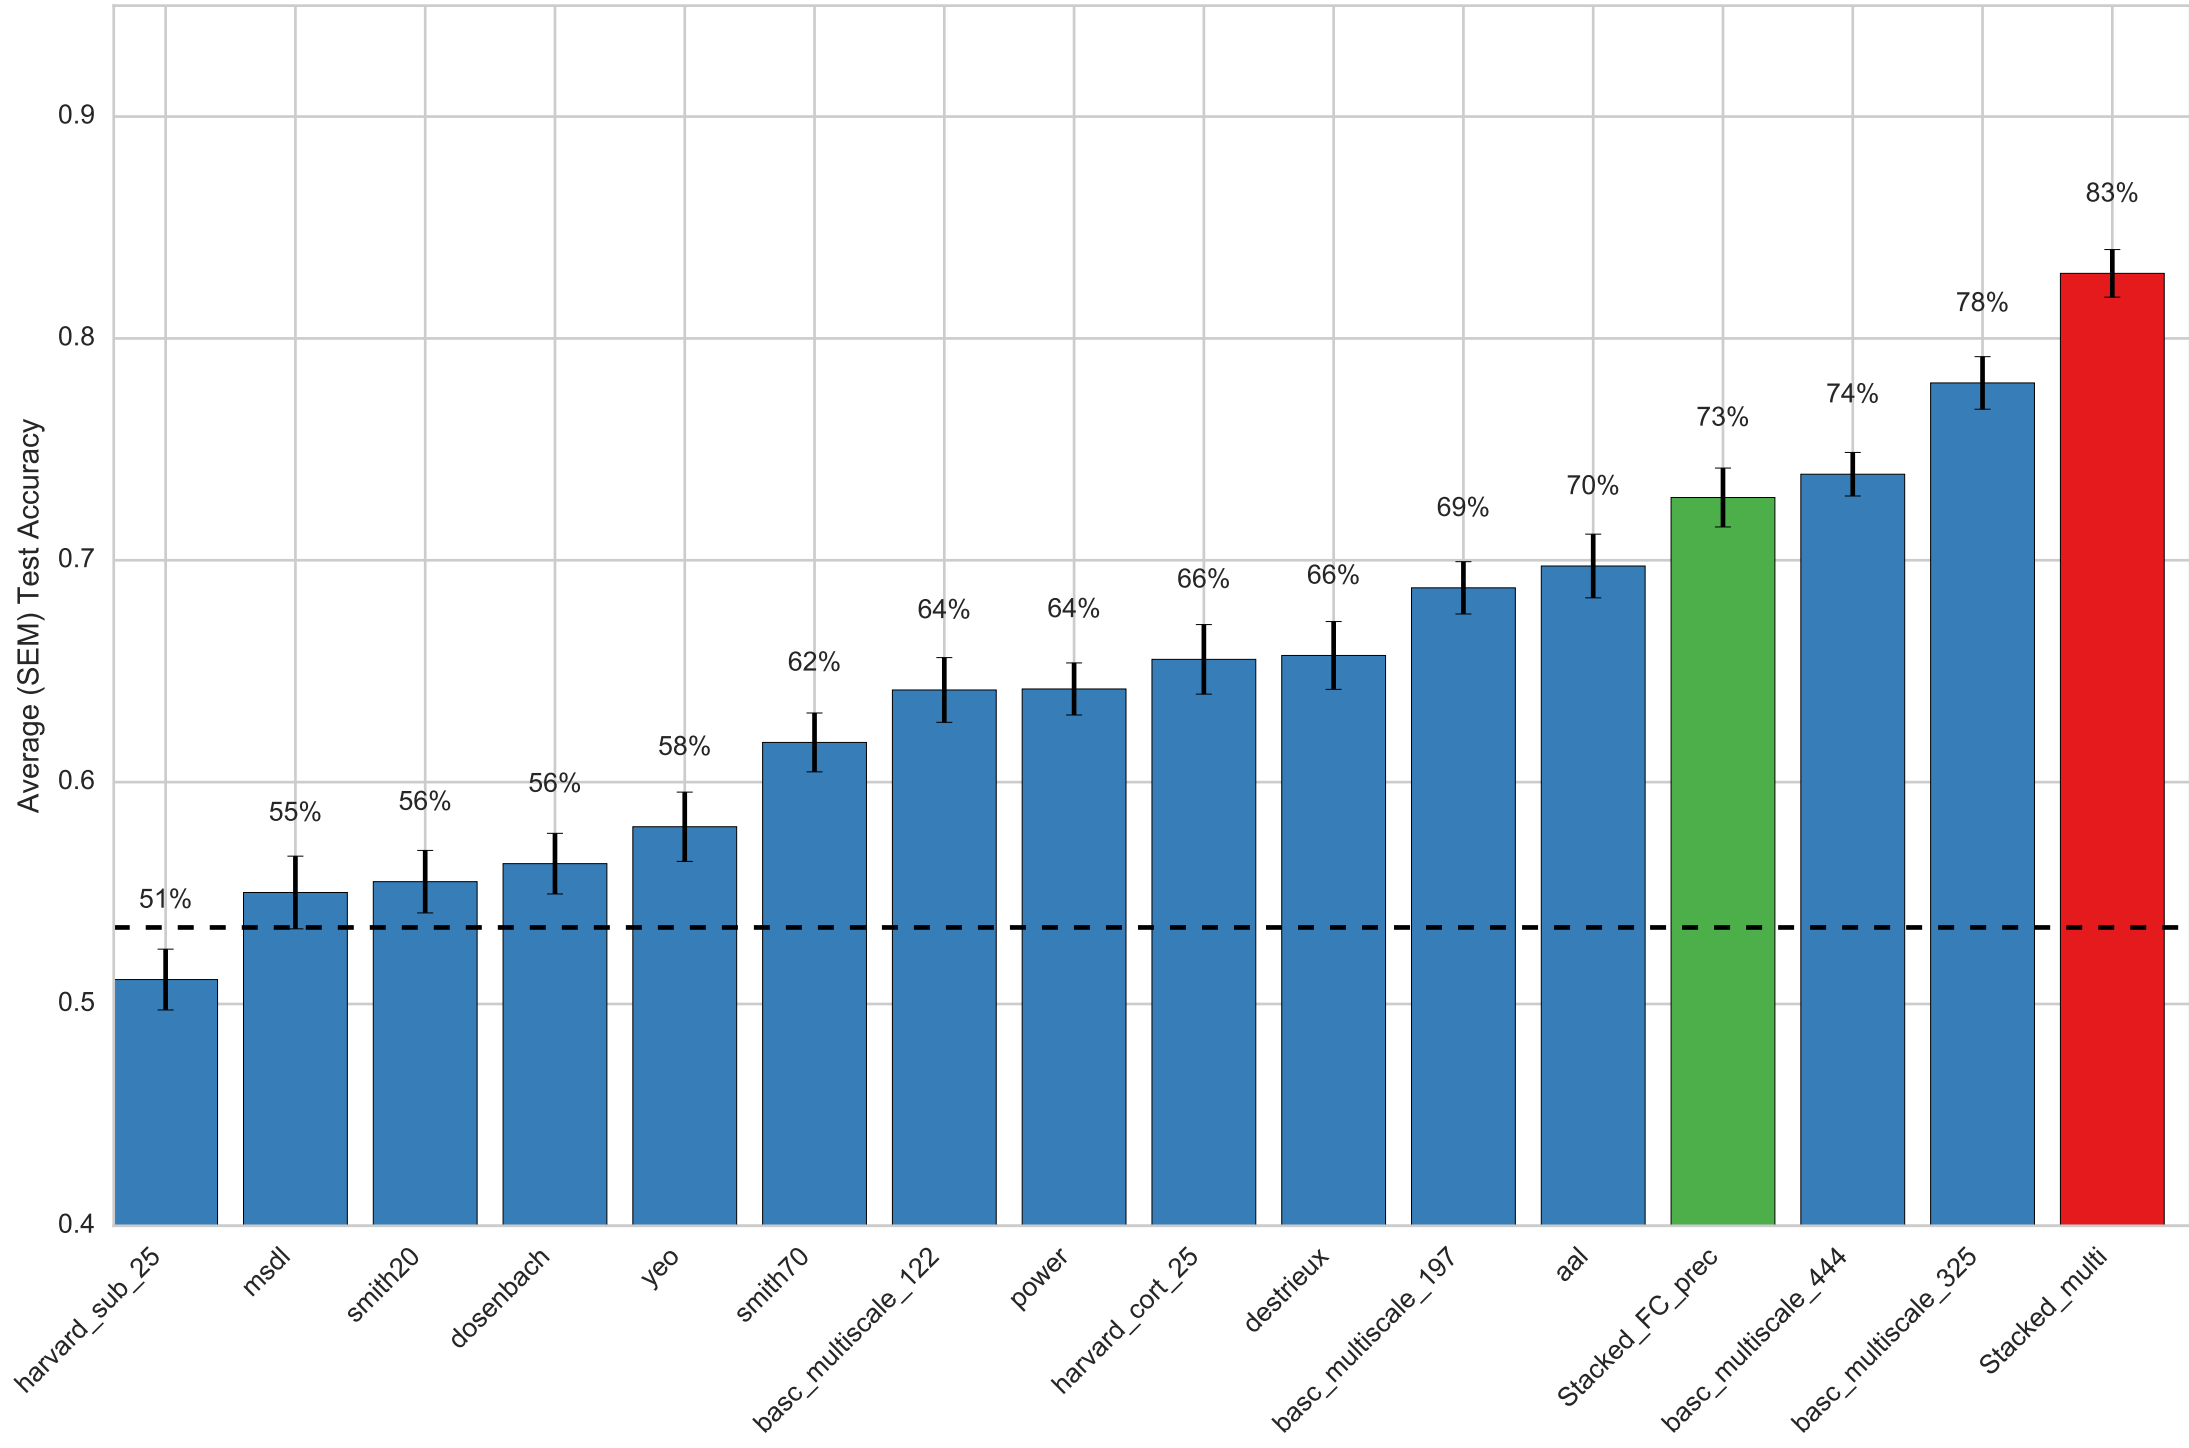

ReHo : Top 5% Feature Selection  
Comparison across 14 parcellations and stacked predictions  
10 fold cross-validation - 5 shuffled iterations

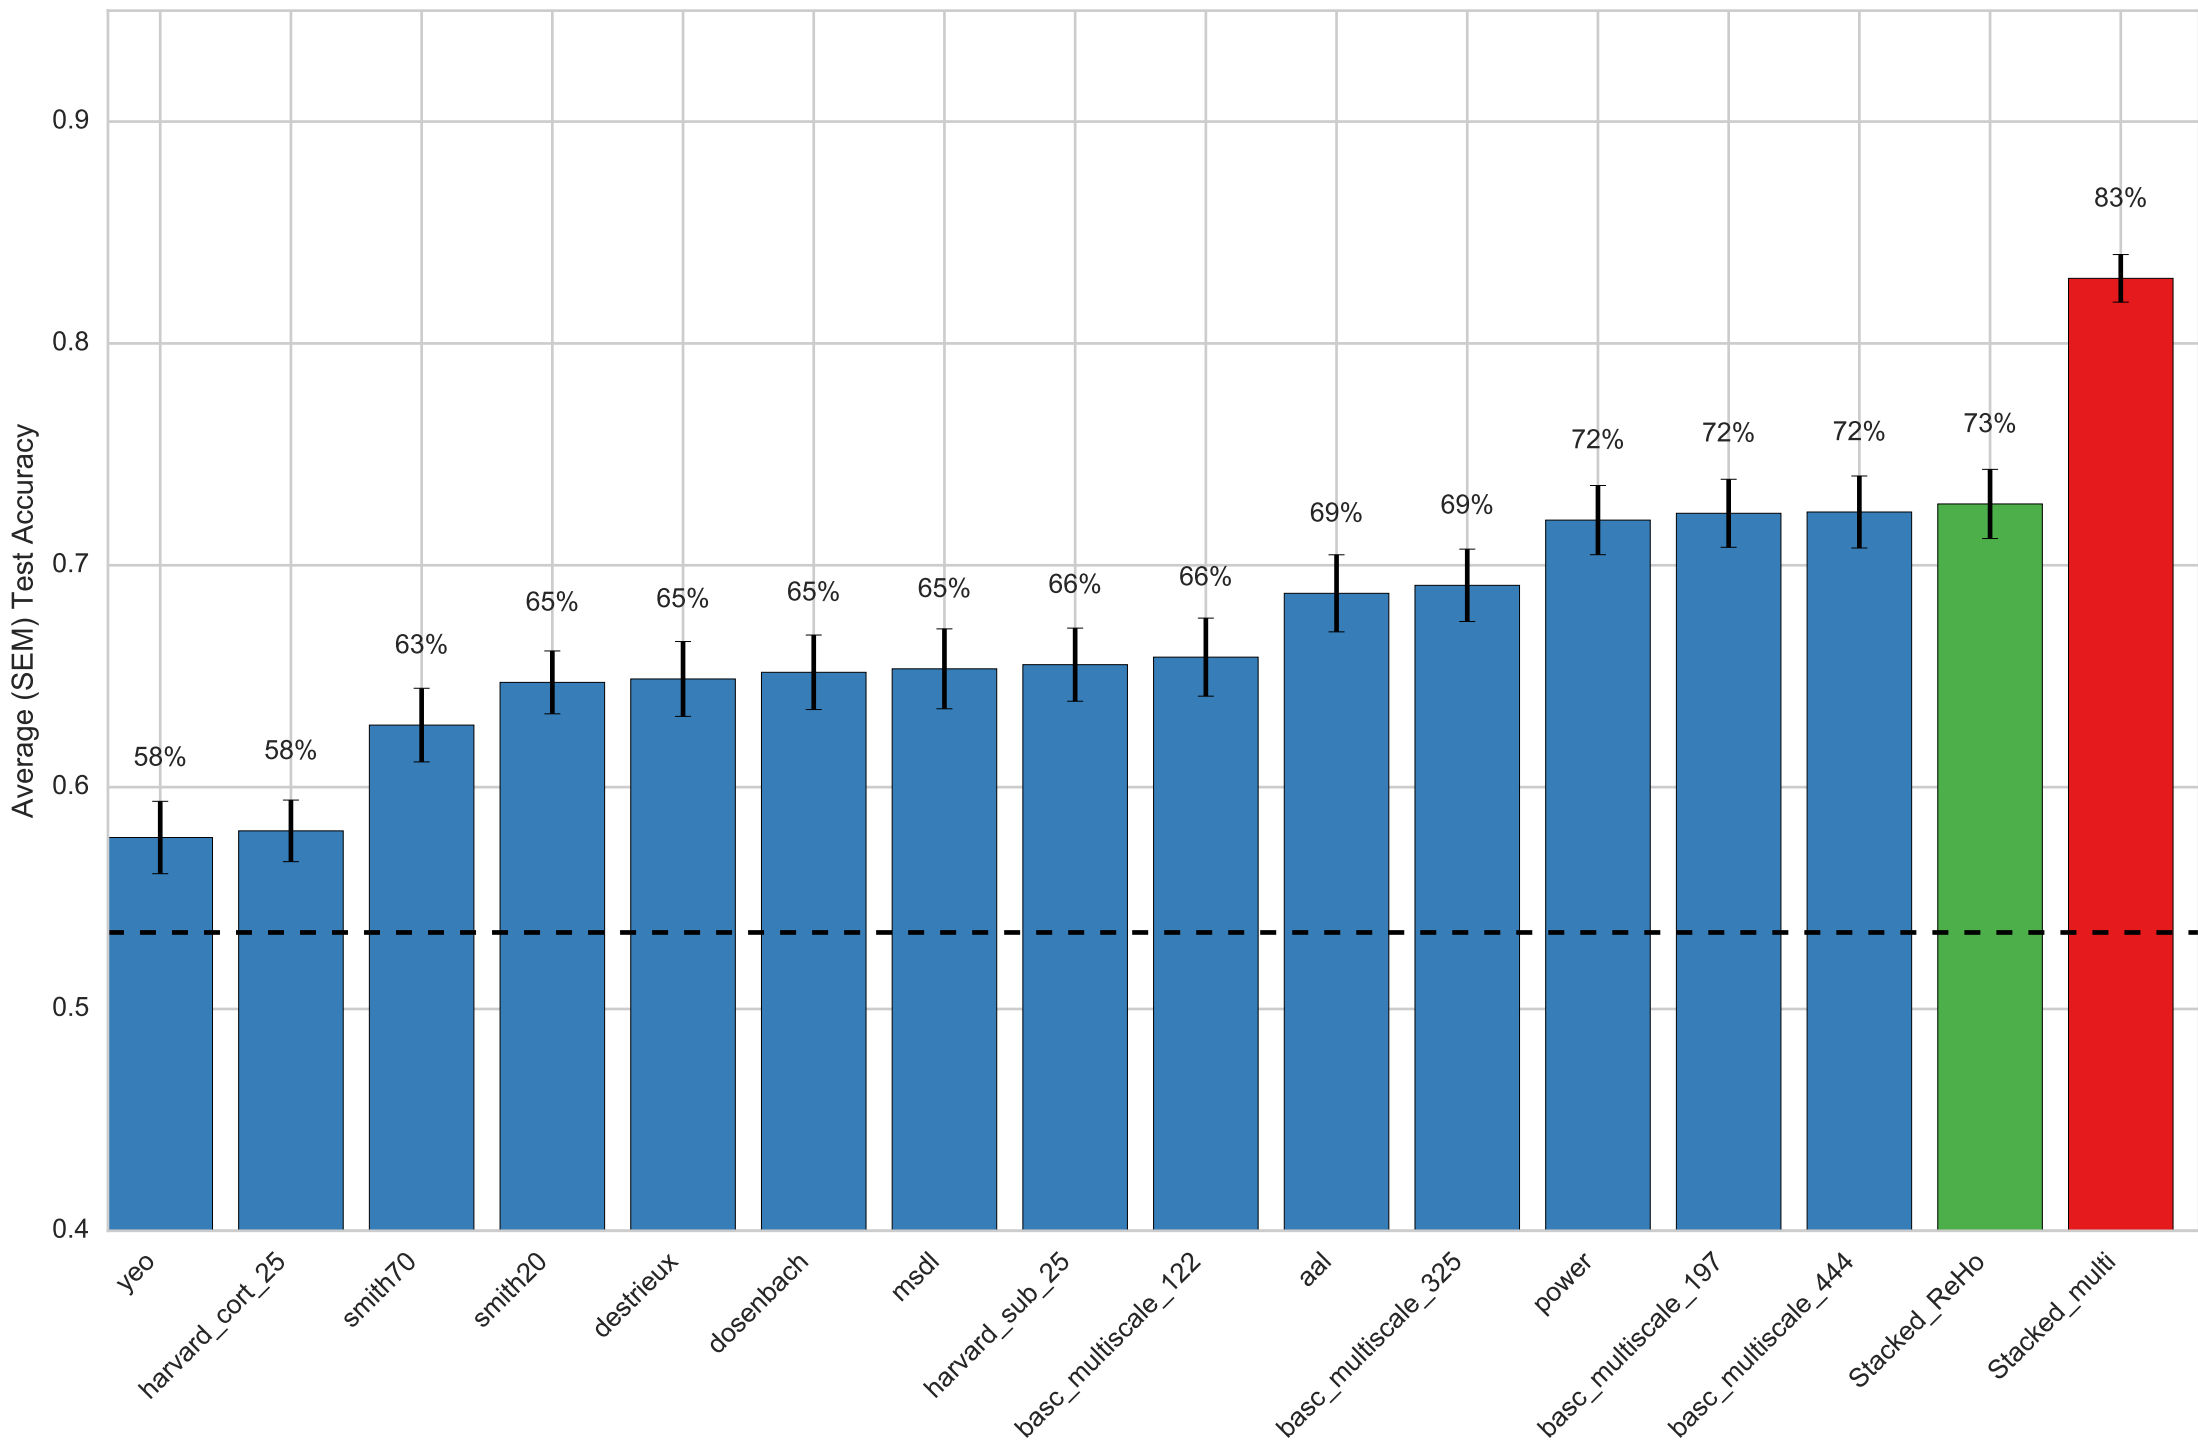

ALFF : Top 5% Feature Selection  
Comparison across 14 parcellations and stacked predictions  
10 fold cross-validation - 5 shuffled iterations

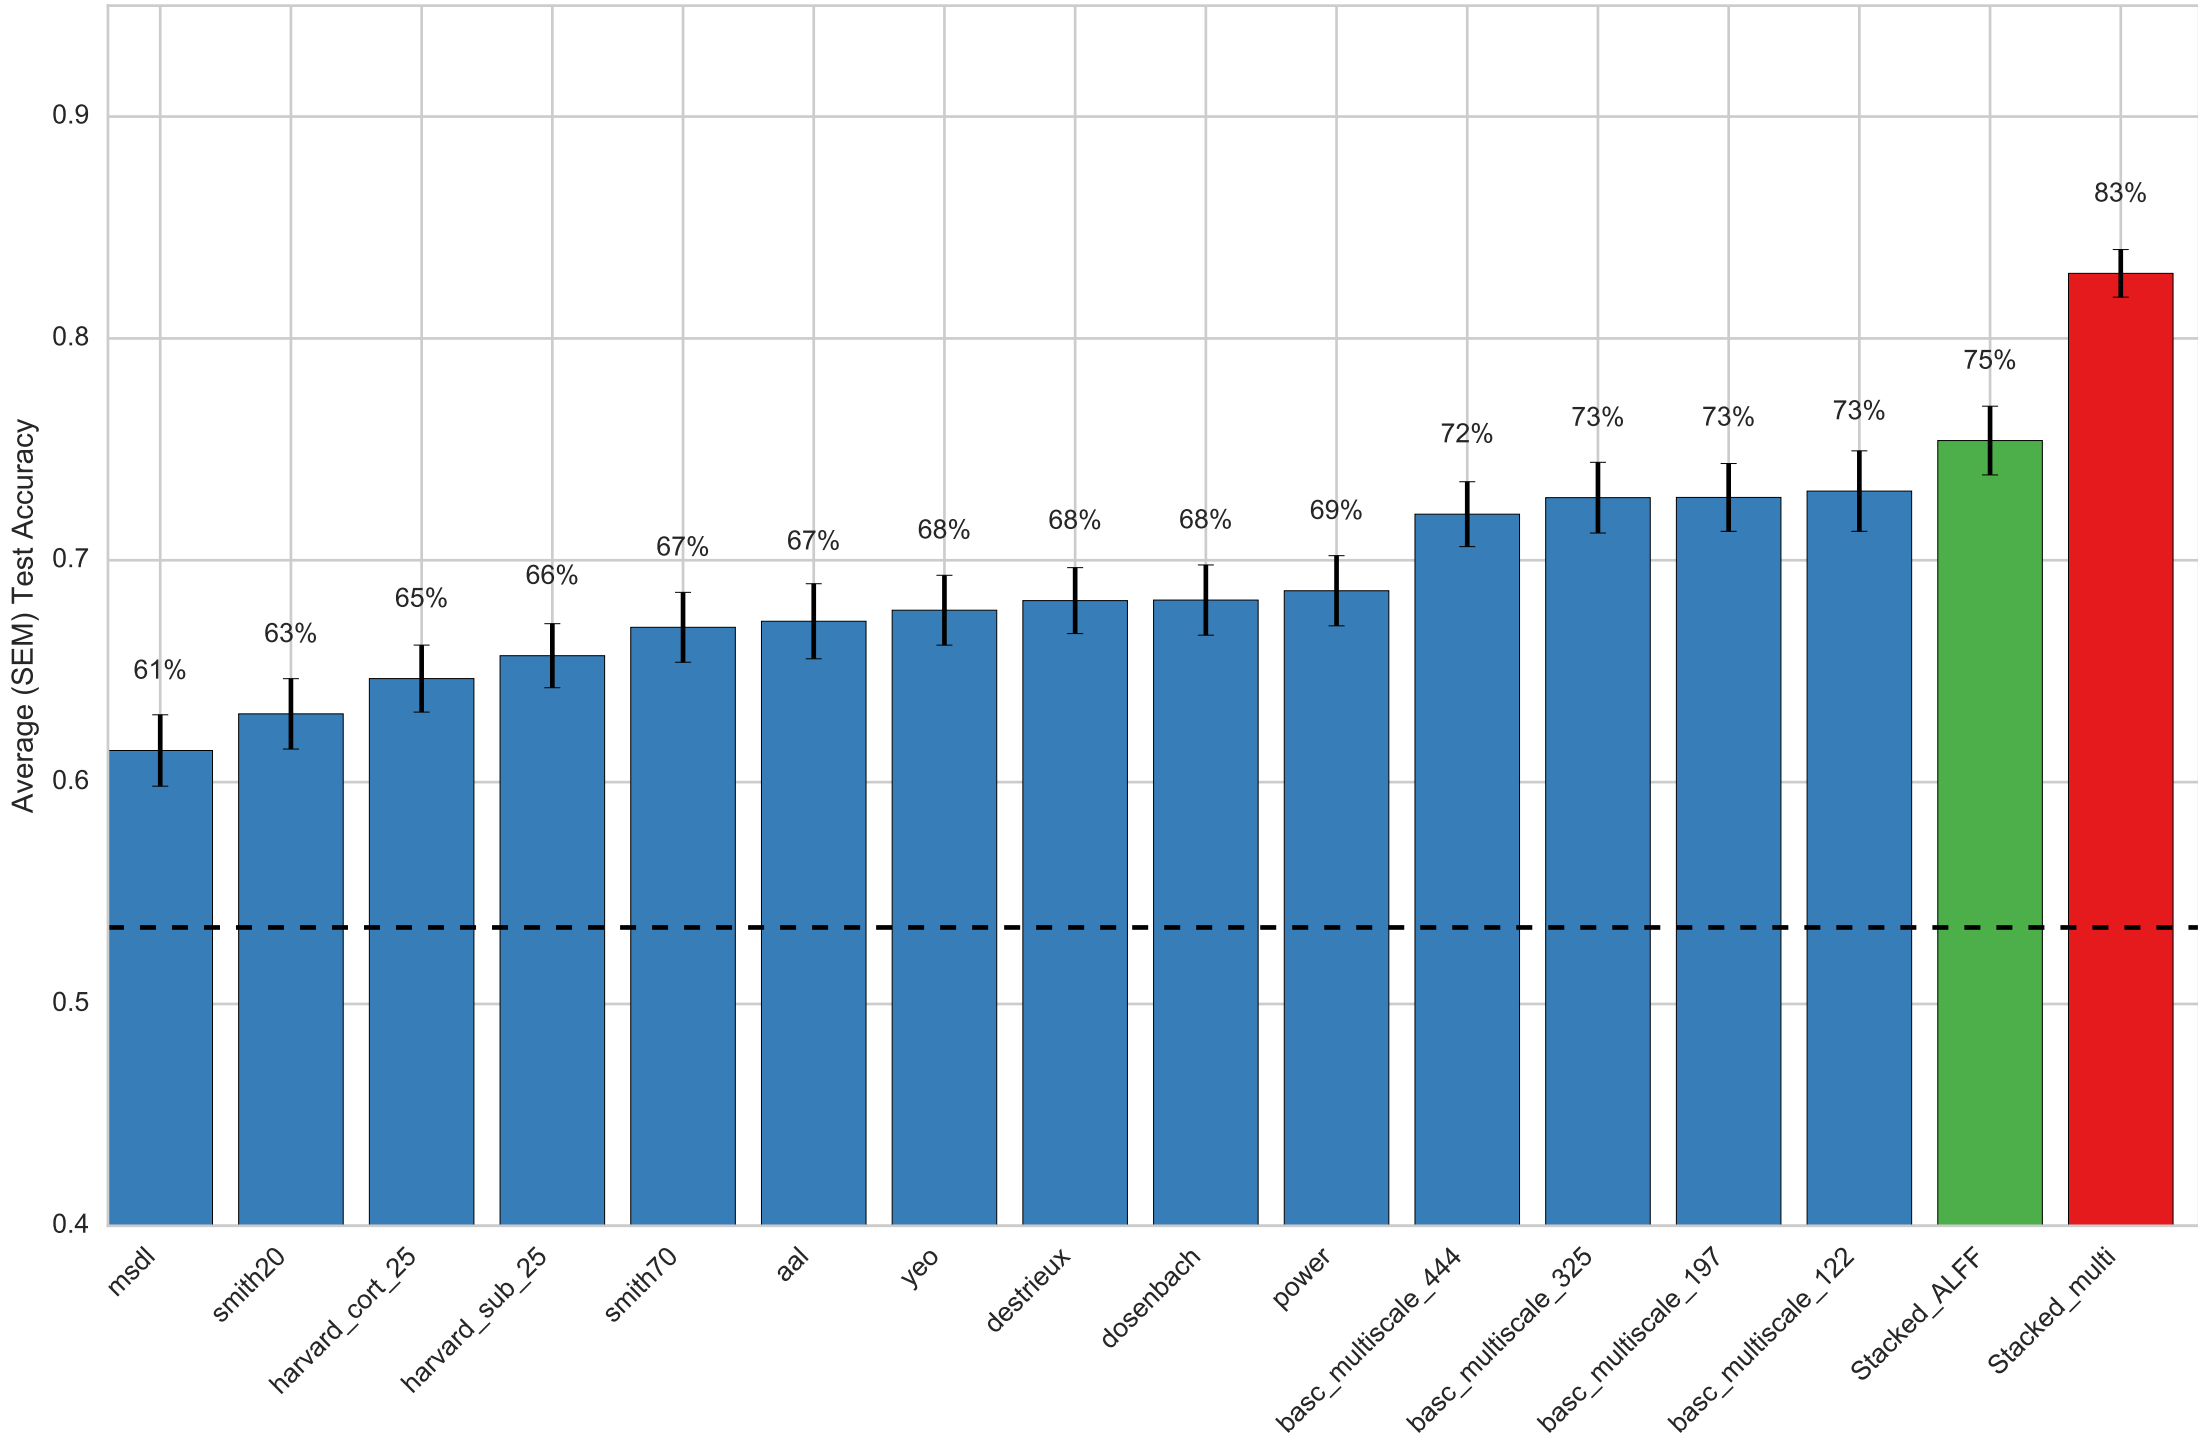

Feature selection / reduction method :Top 10% Feature Selection

fALFF : Top 10% Feature Selection  
Comparison across 14 parcellations and stacked predictions  
10 fold cross-validation - 5 shuffled iterations

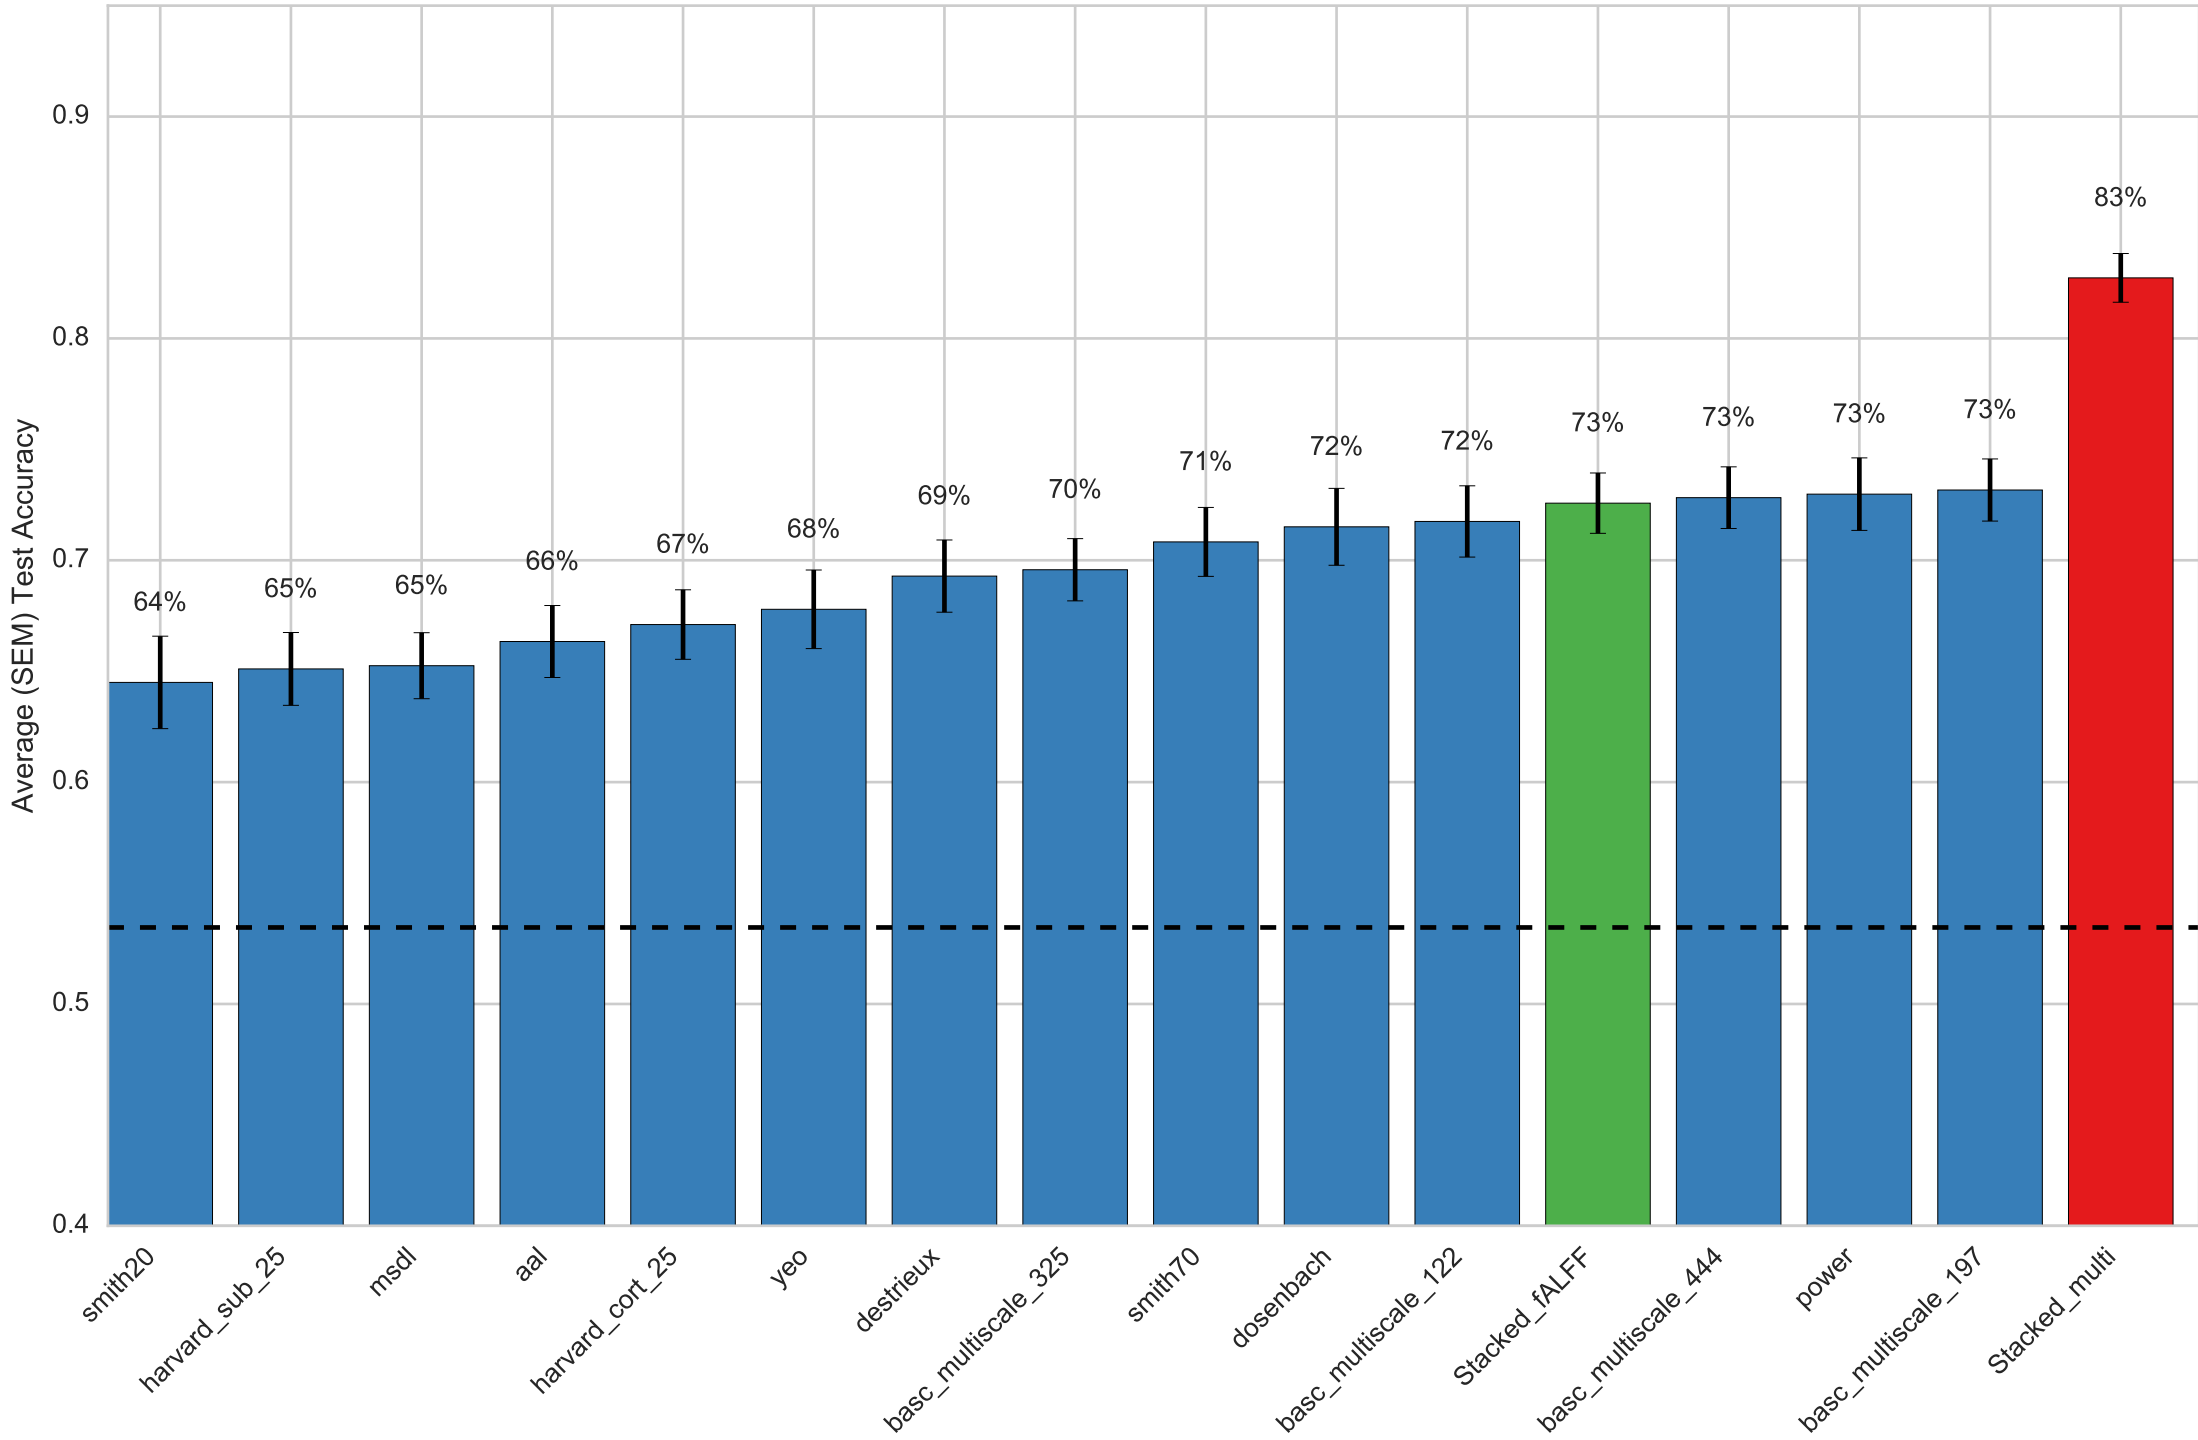

FC\_corr : Top 10% Feature Selection  
Comparison across 14 parcellations and stacked predictions  
10 fold cross-validation - 5 shuffled iterations

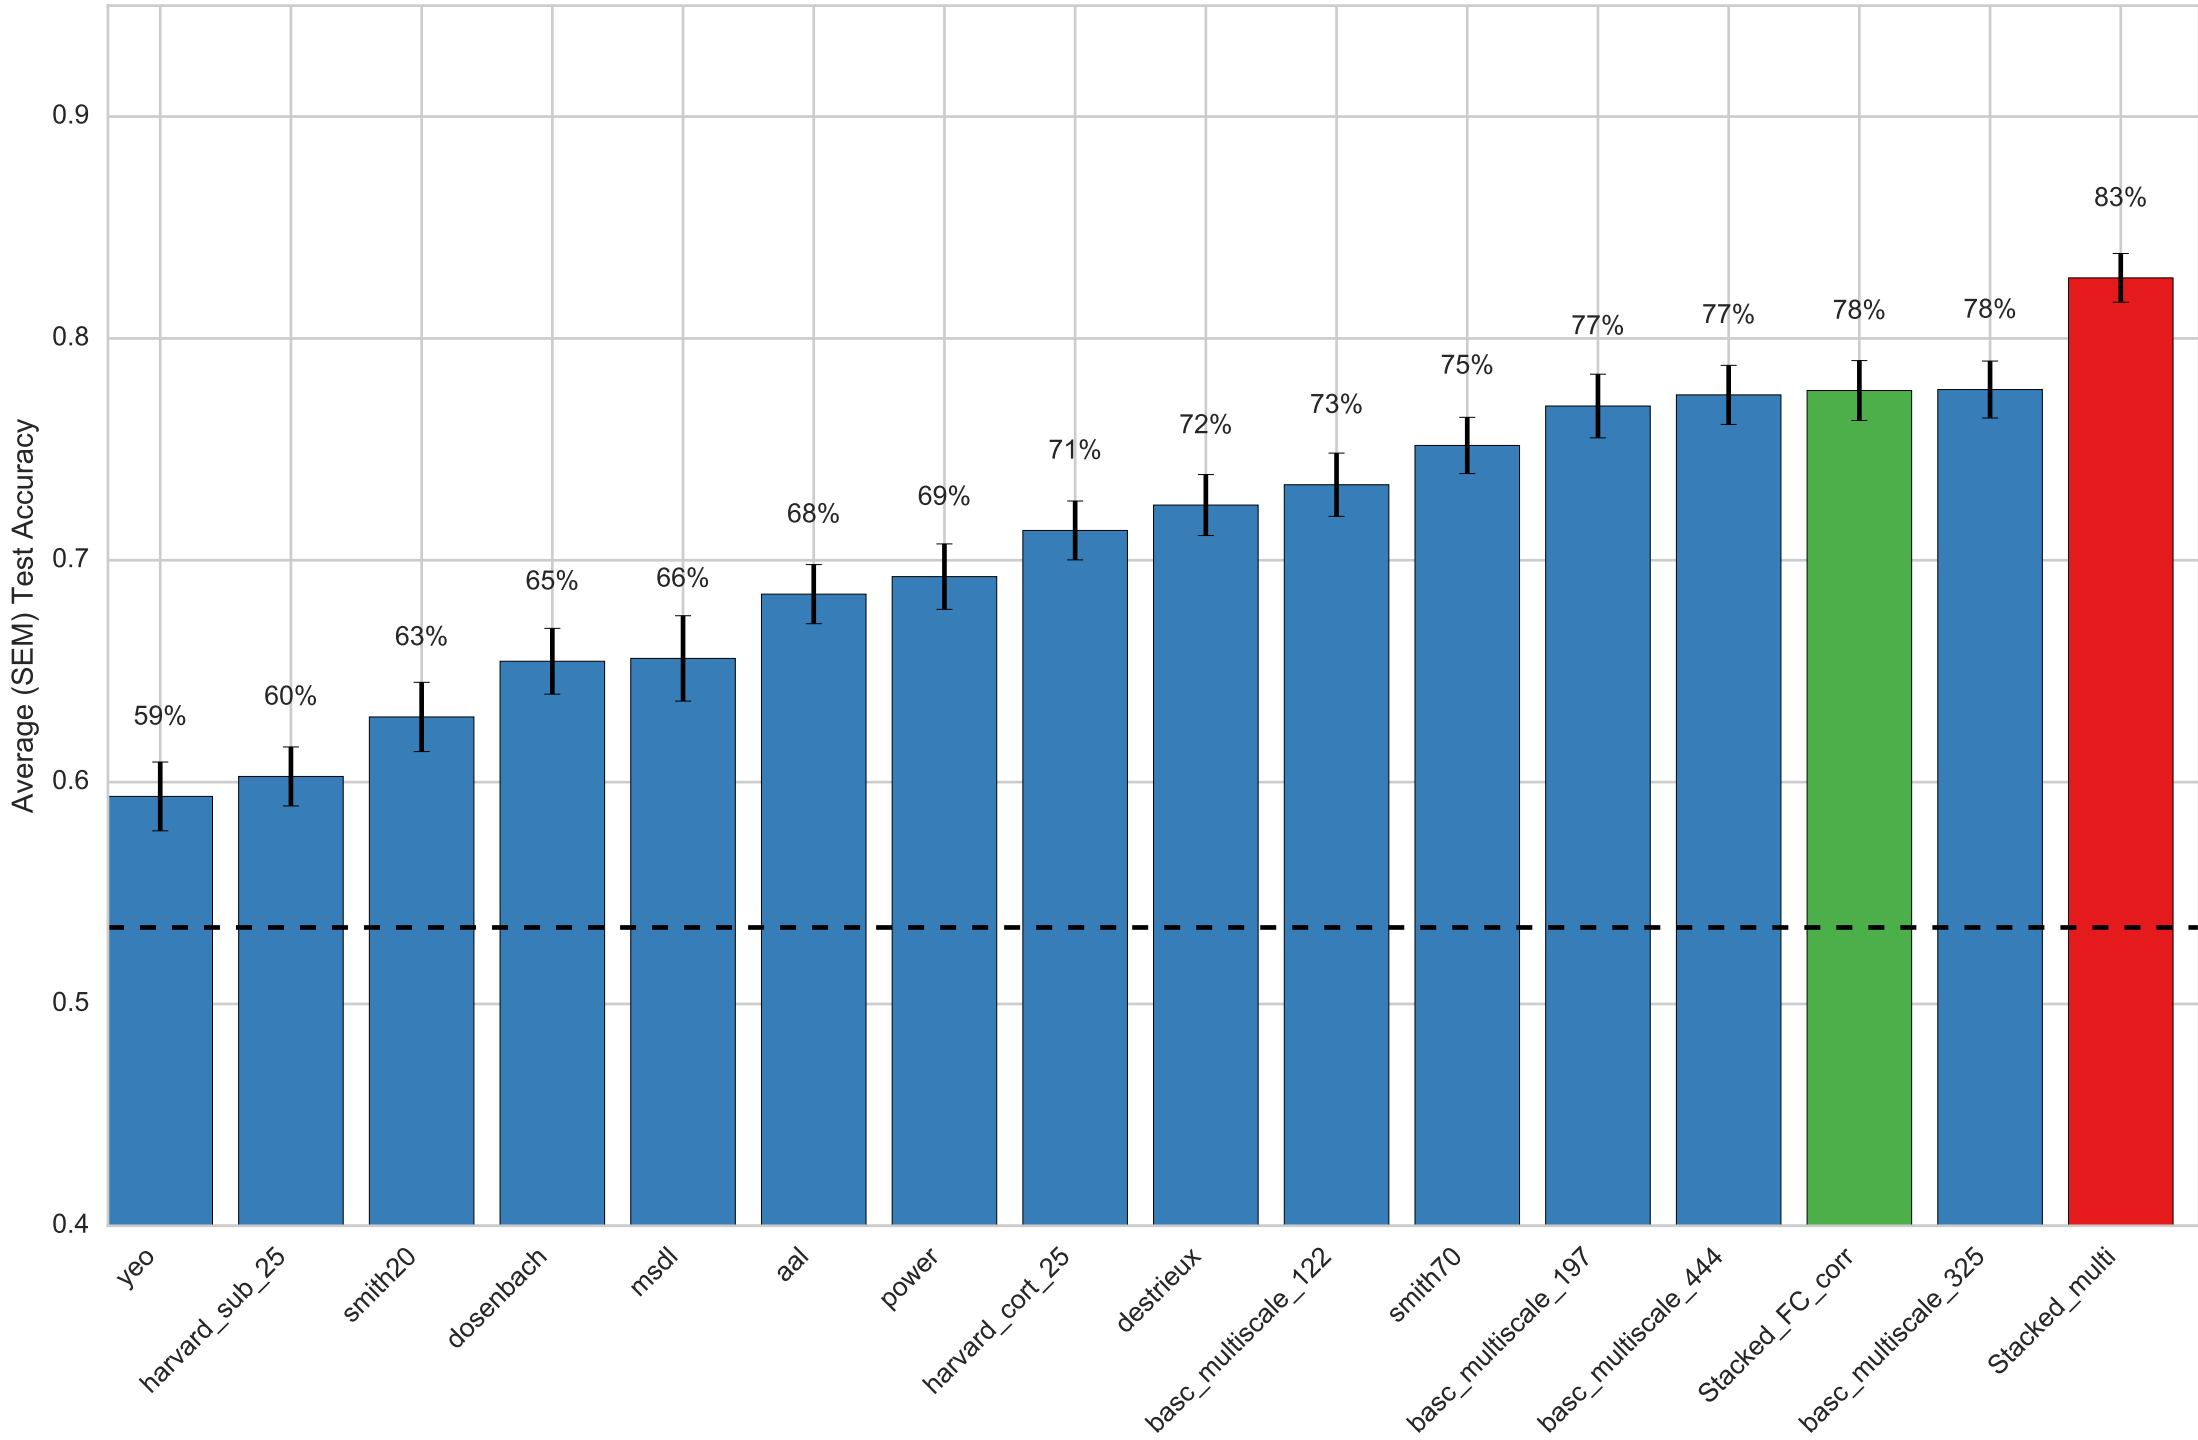

FC\_part : Top 10% Feature Selection  
Comparison across 14 parcellations and stacked predictions  
10 fold cross-validation - 5 shuffled iterations

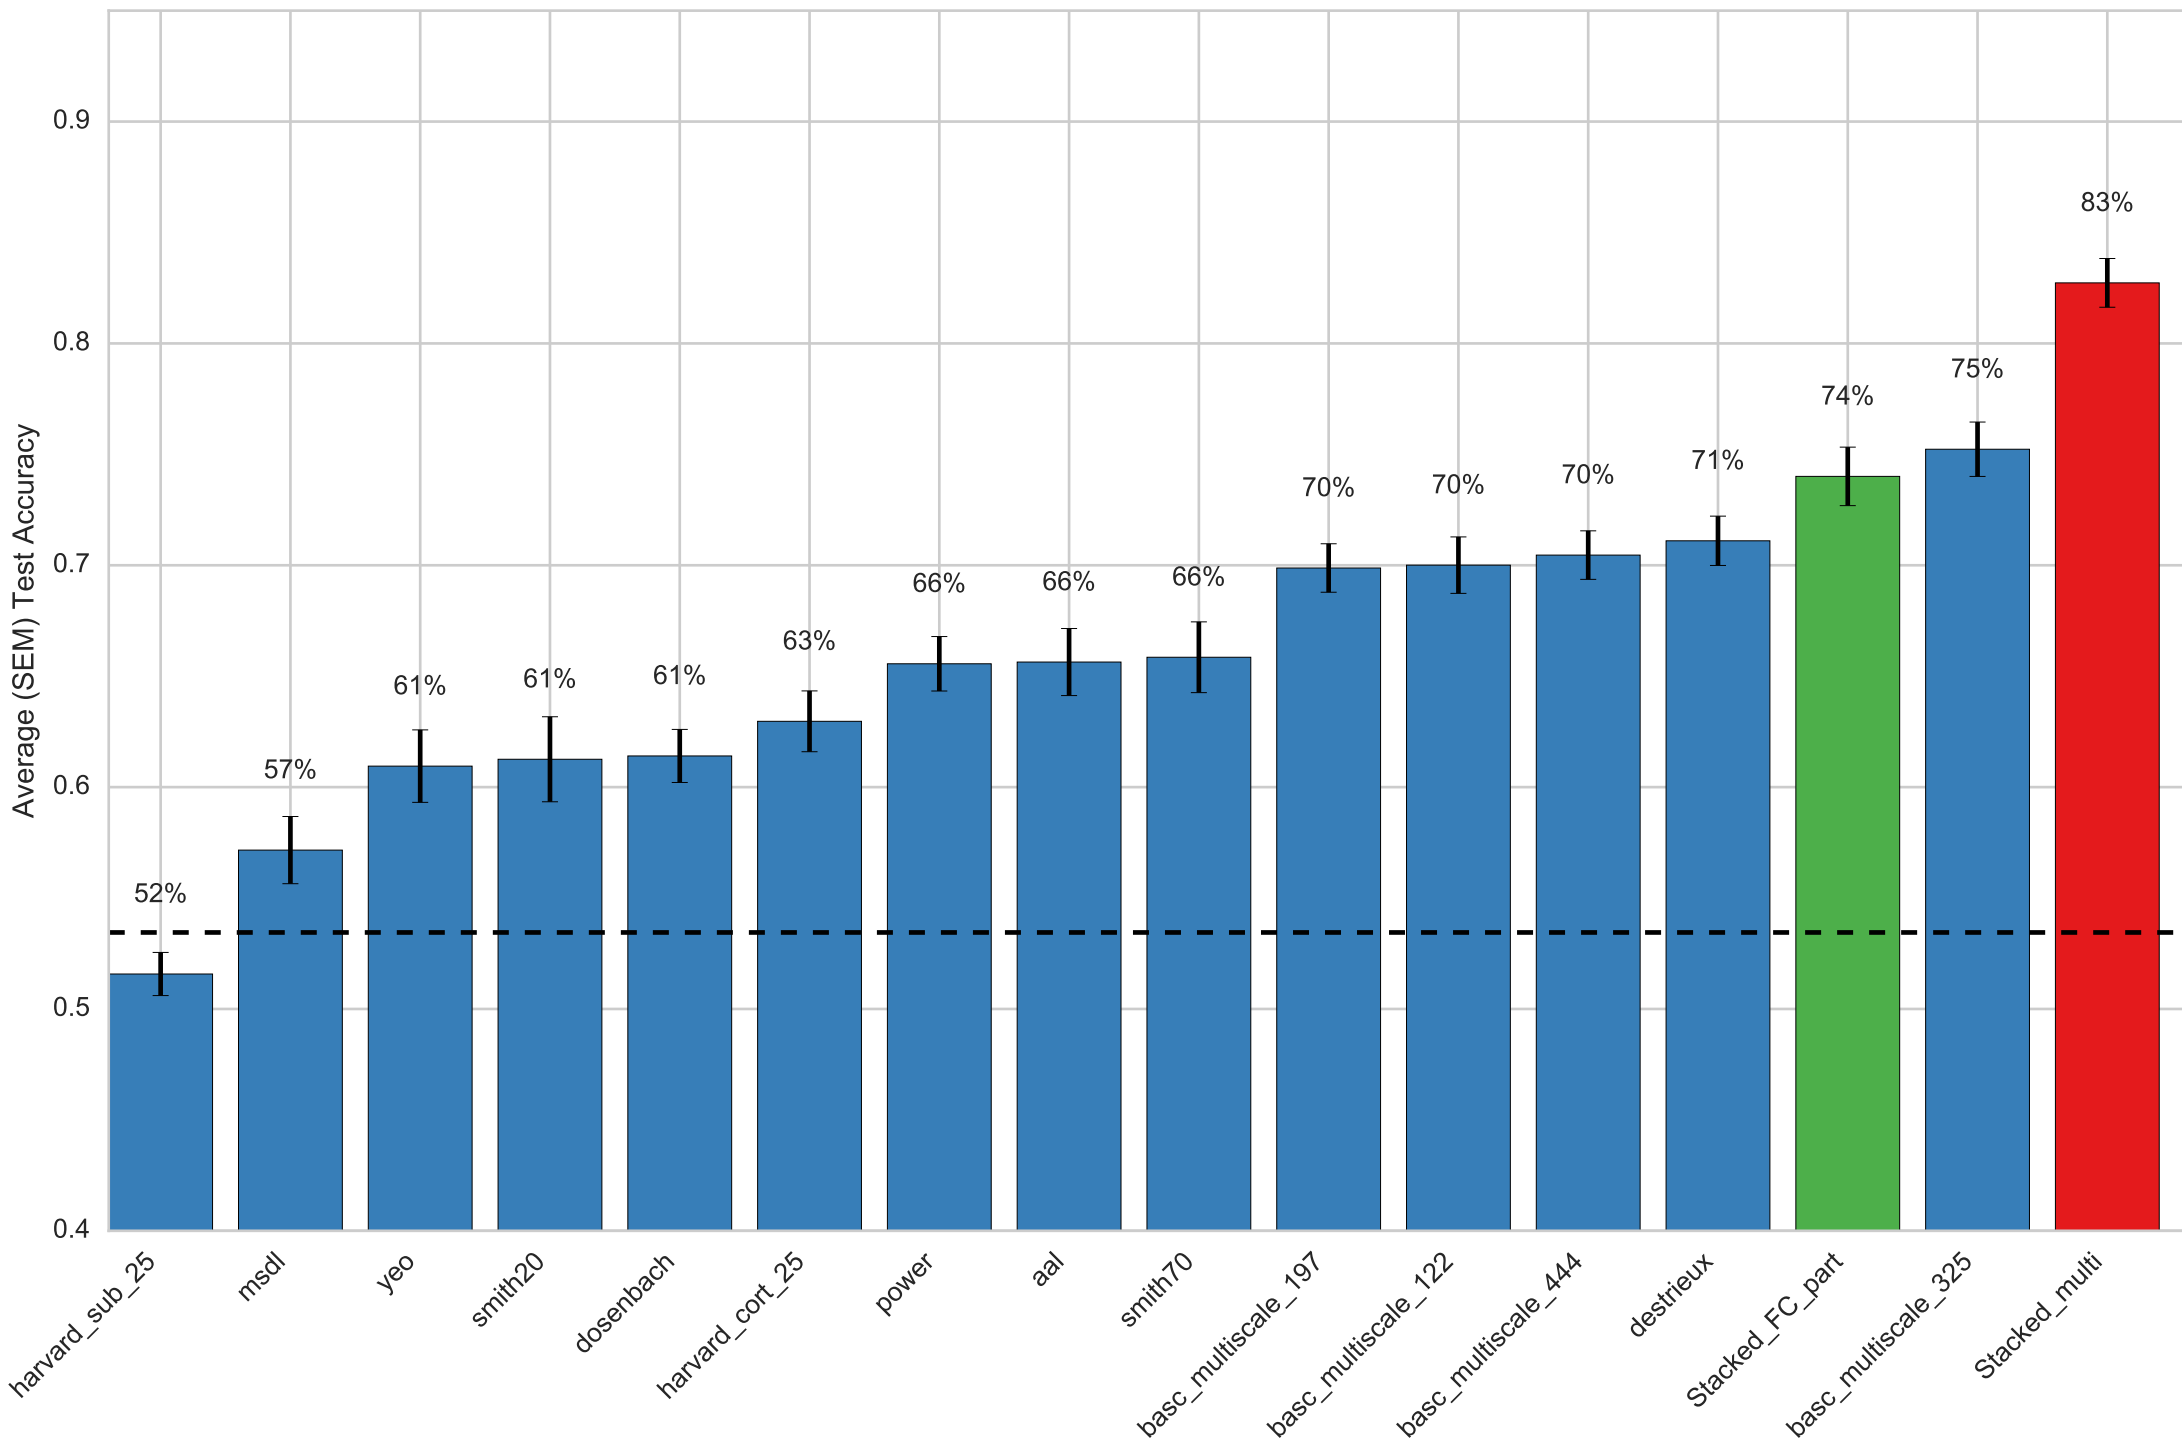

FC\_prec : Top 10% Feature Selection  
Comparison across 14 parcellations and stacked predictions  
10 fold cross-validation - 5 shuffled iterations

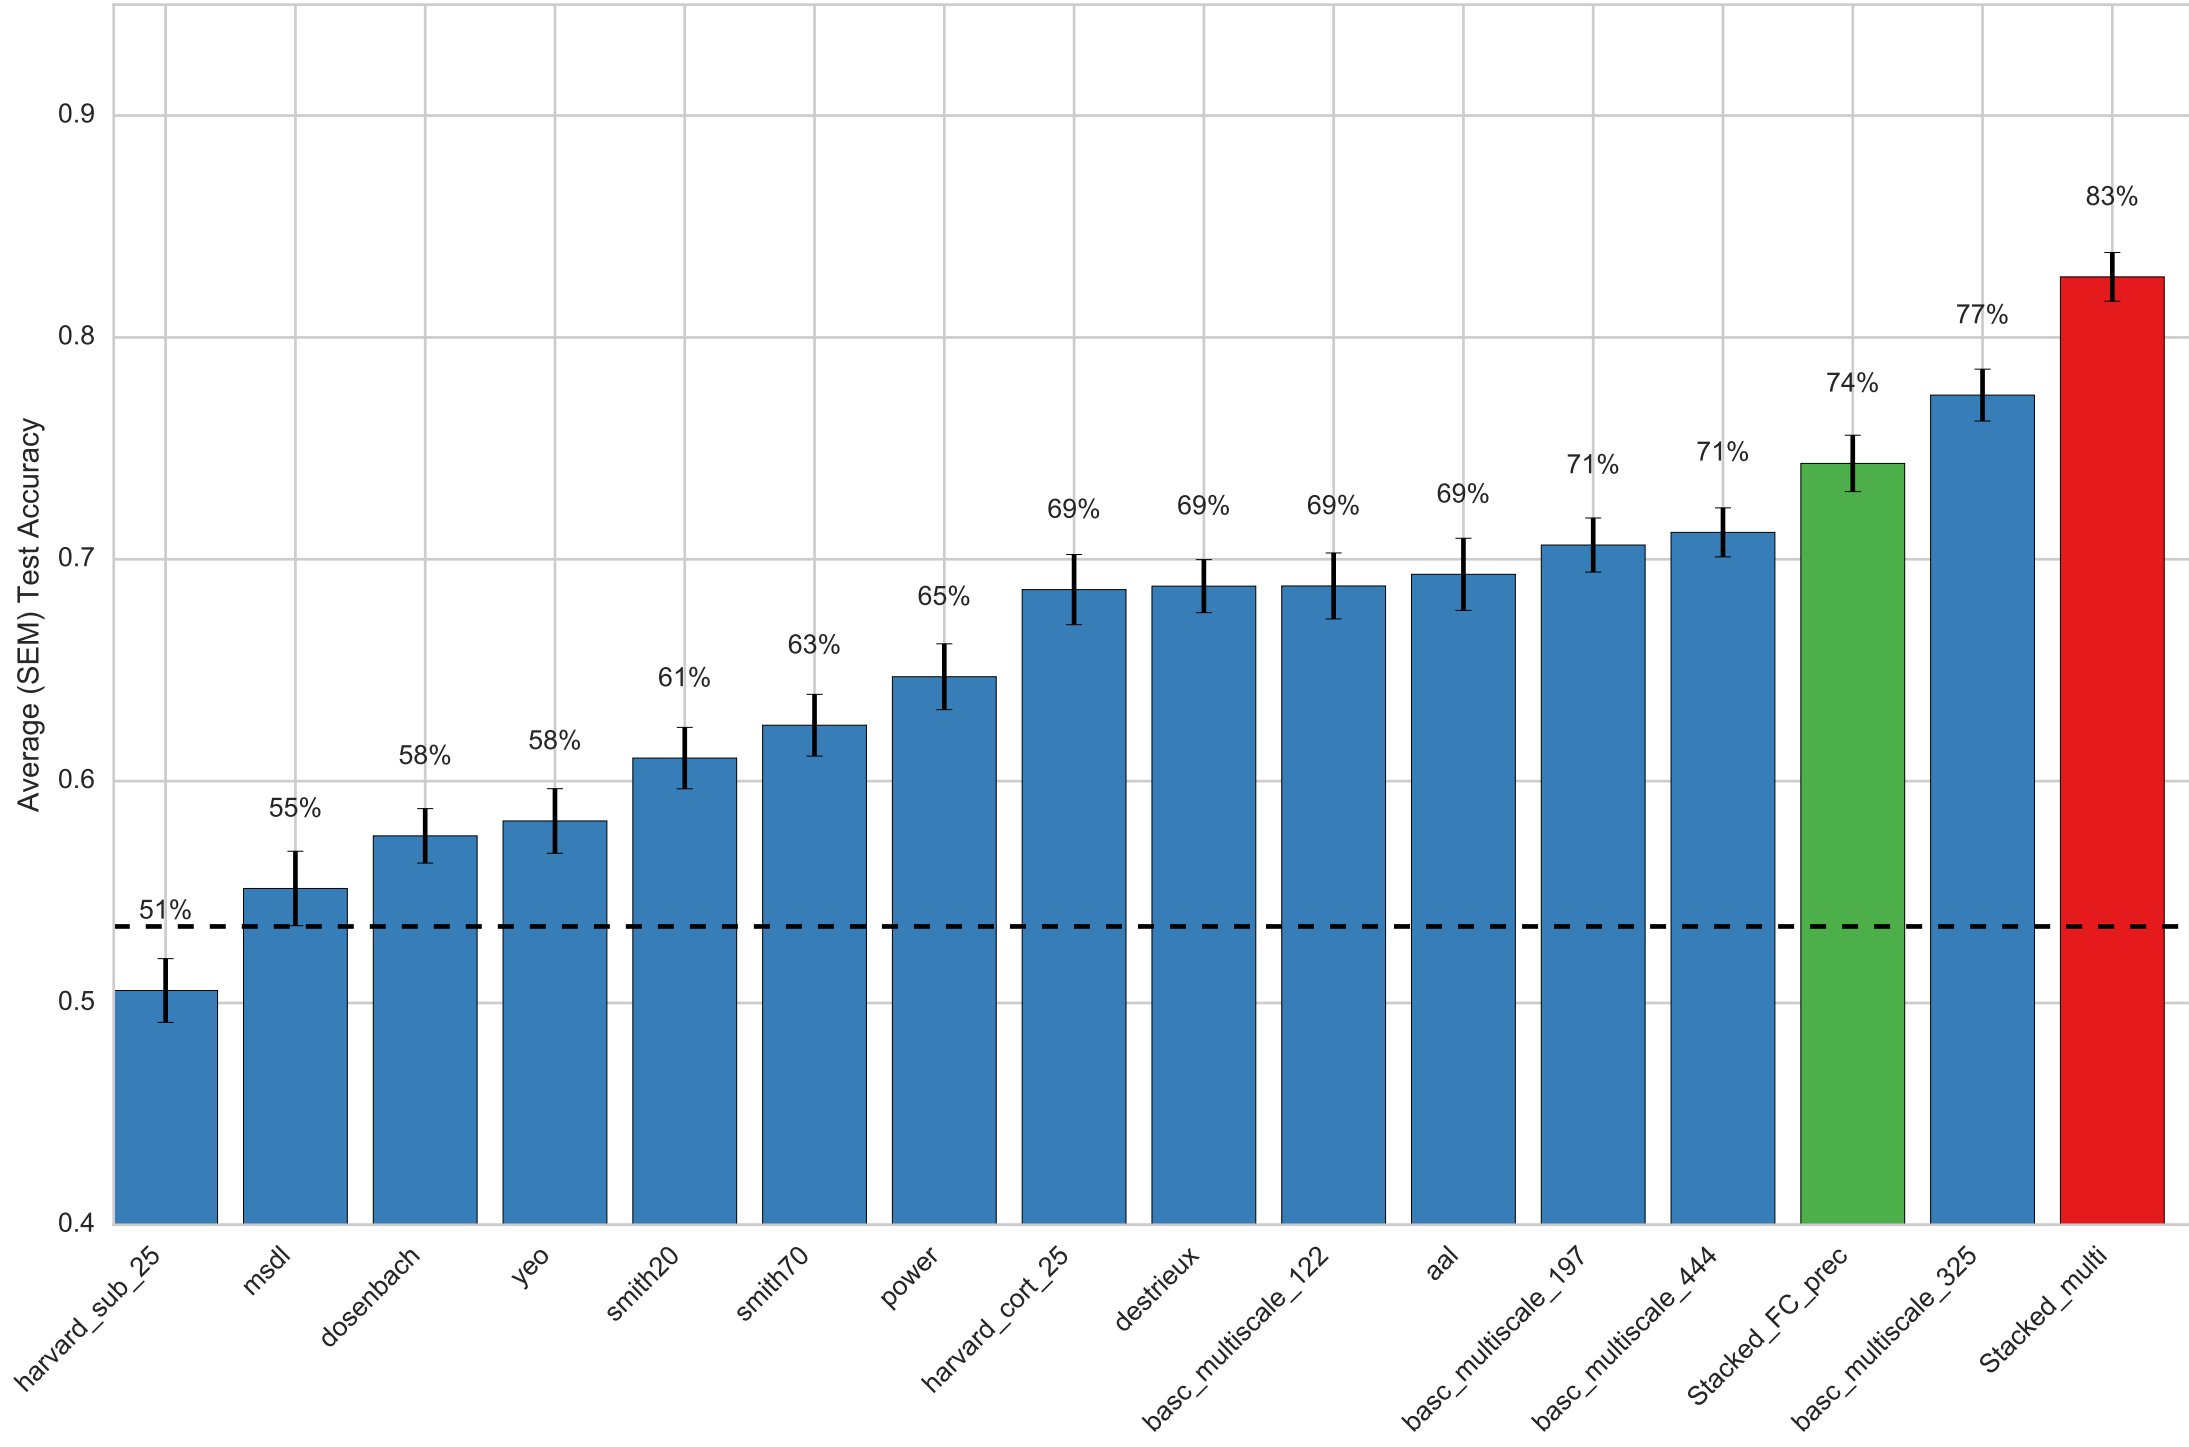



ReHo : Top 10% Feature Selection  
Comparison across 14 parcellations and stacked predictions  
10 fold cross-validation - 5 shuffled iterations

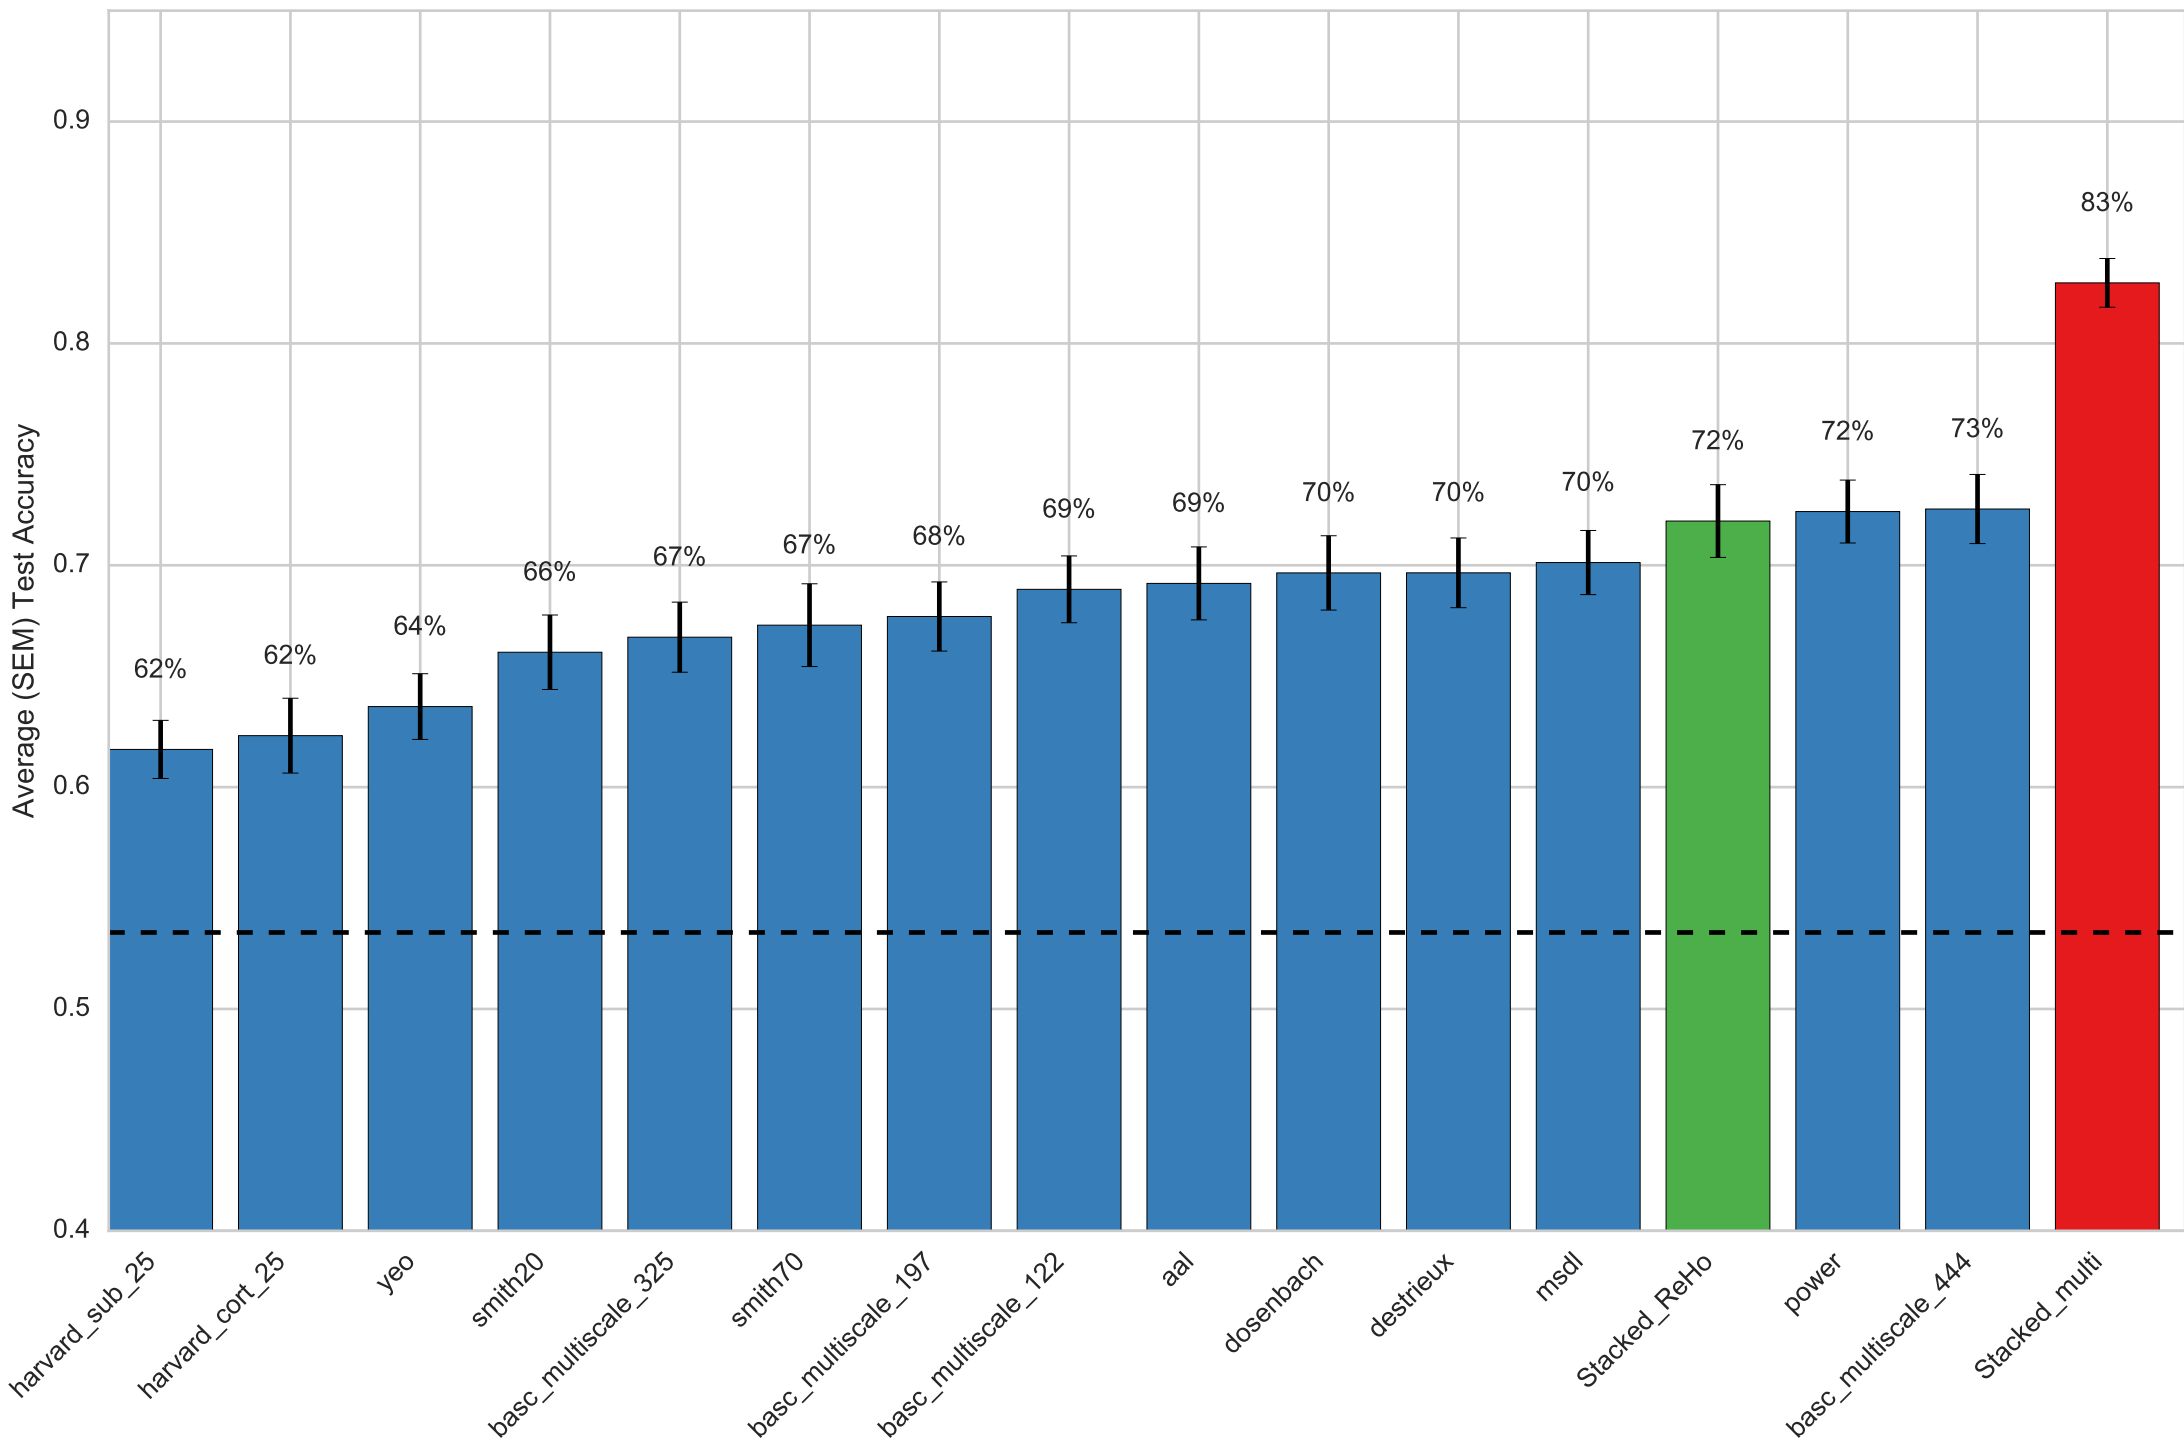

ALFF : Top 10% Feature Selection  
Comparison across 14 parcellations and stacked predictions  
10 fold cross-validation - 5 shuffled iterations

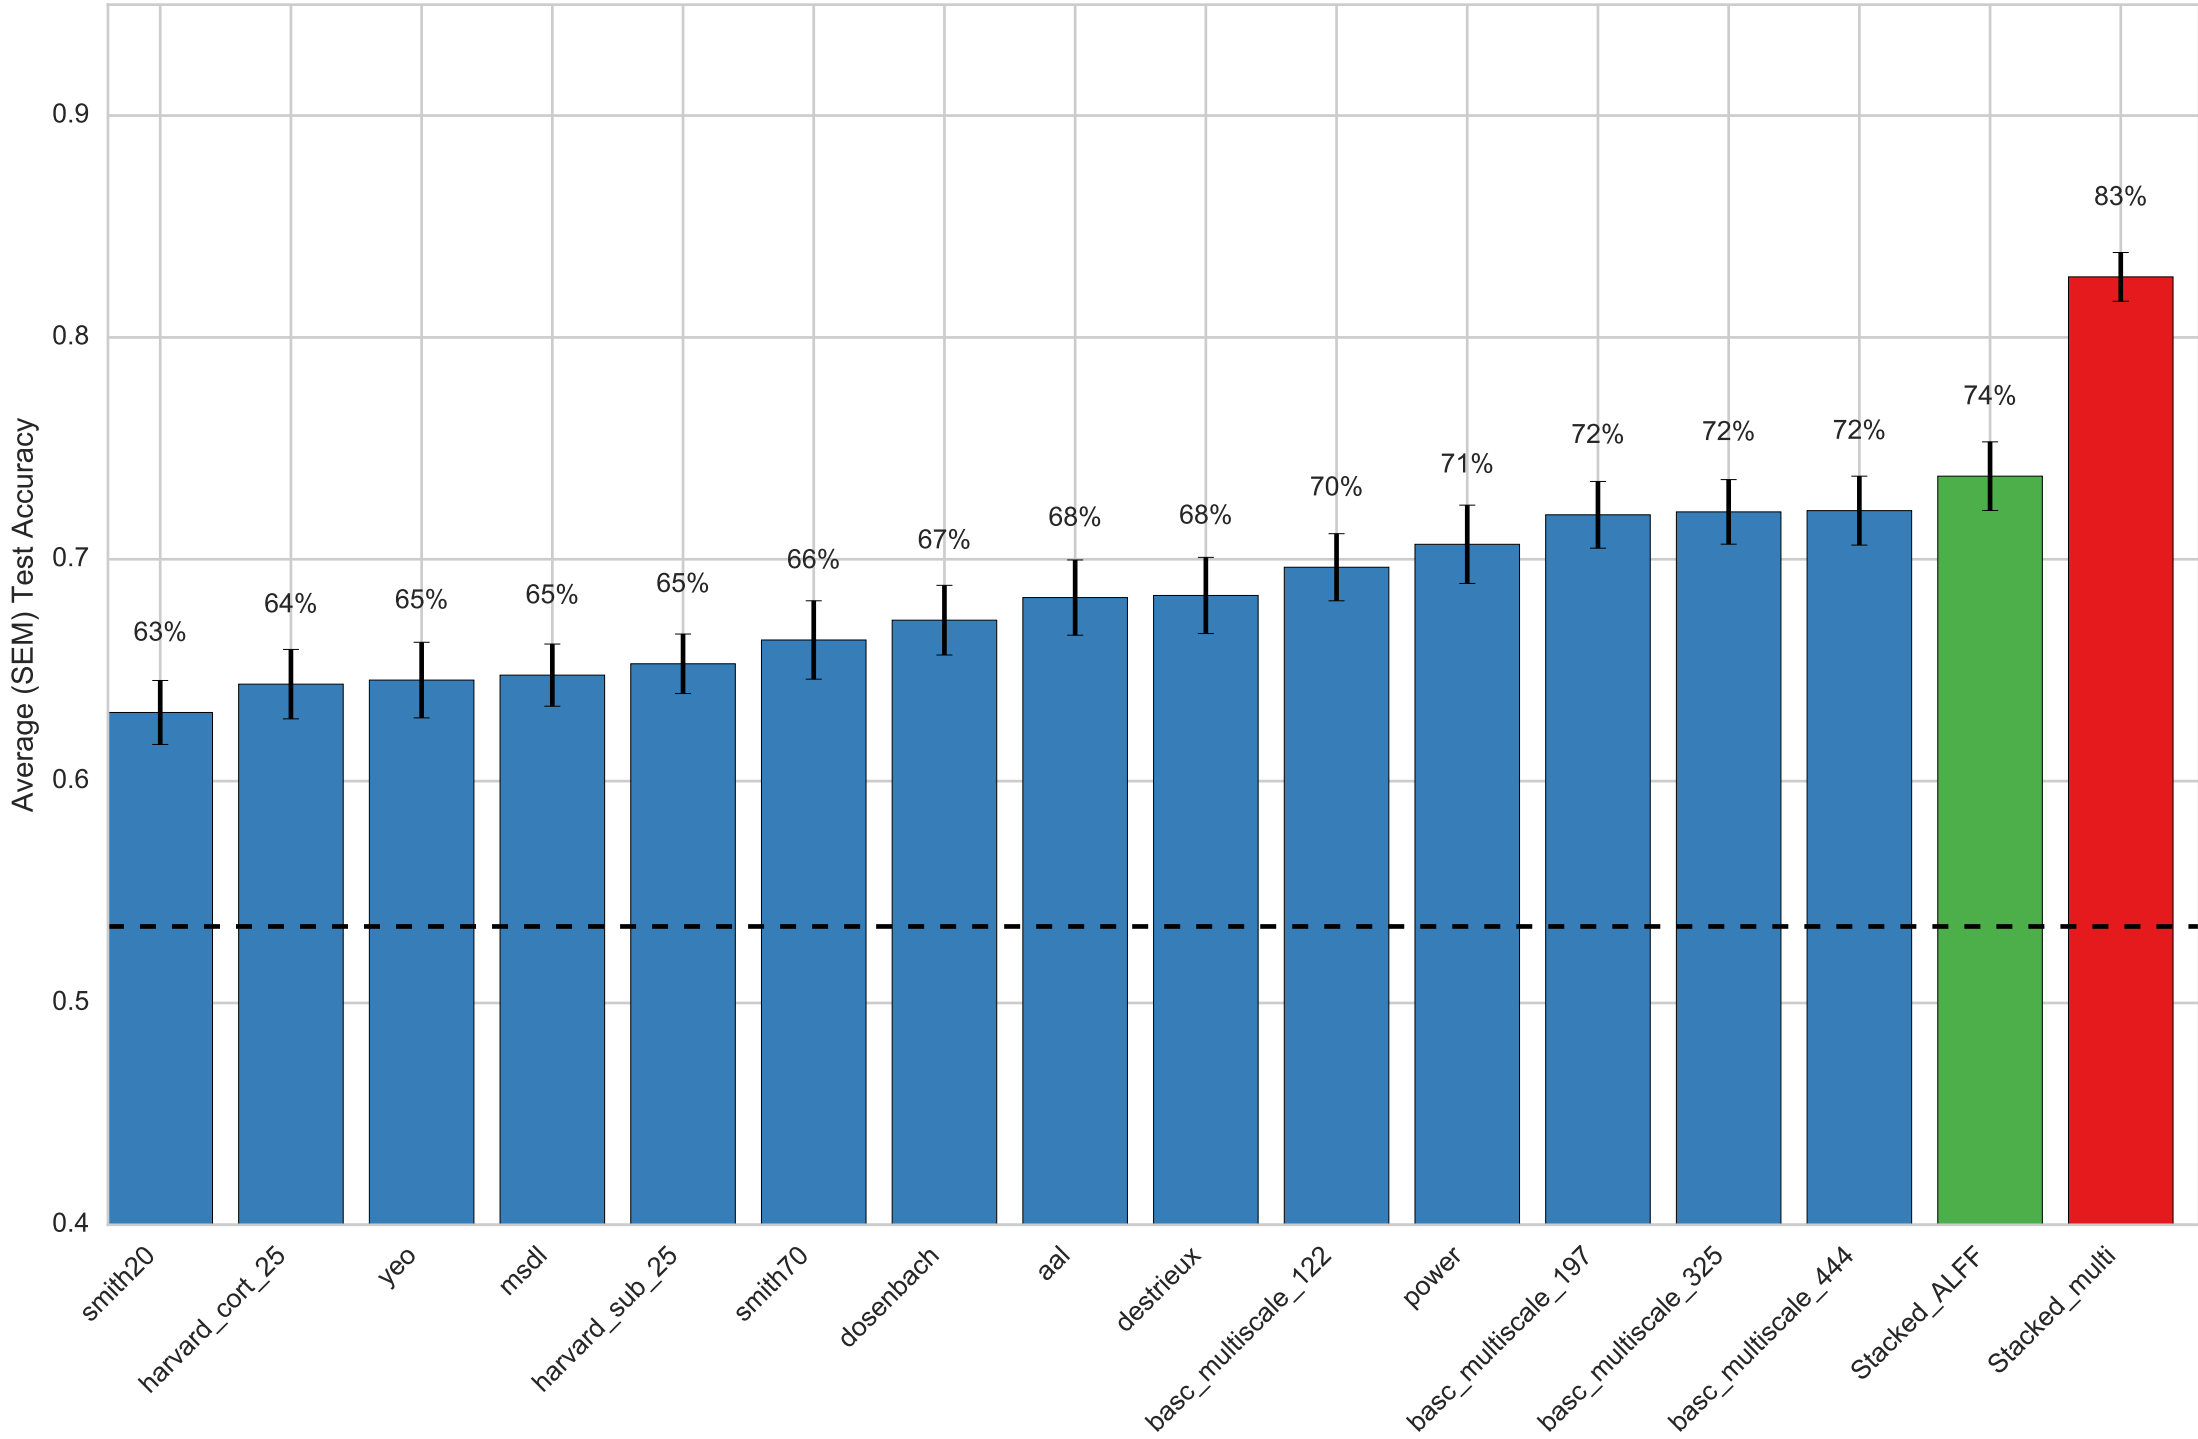

Feature selection / reduction method :Top 0.5% Feature Selection

fALFF : Top 0.5% Feature Selection  
Comparison across 14 parcellations and stacked predictions  
10 fold cross-validation - 5 shuffled iterations

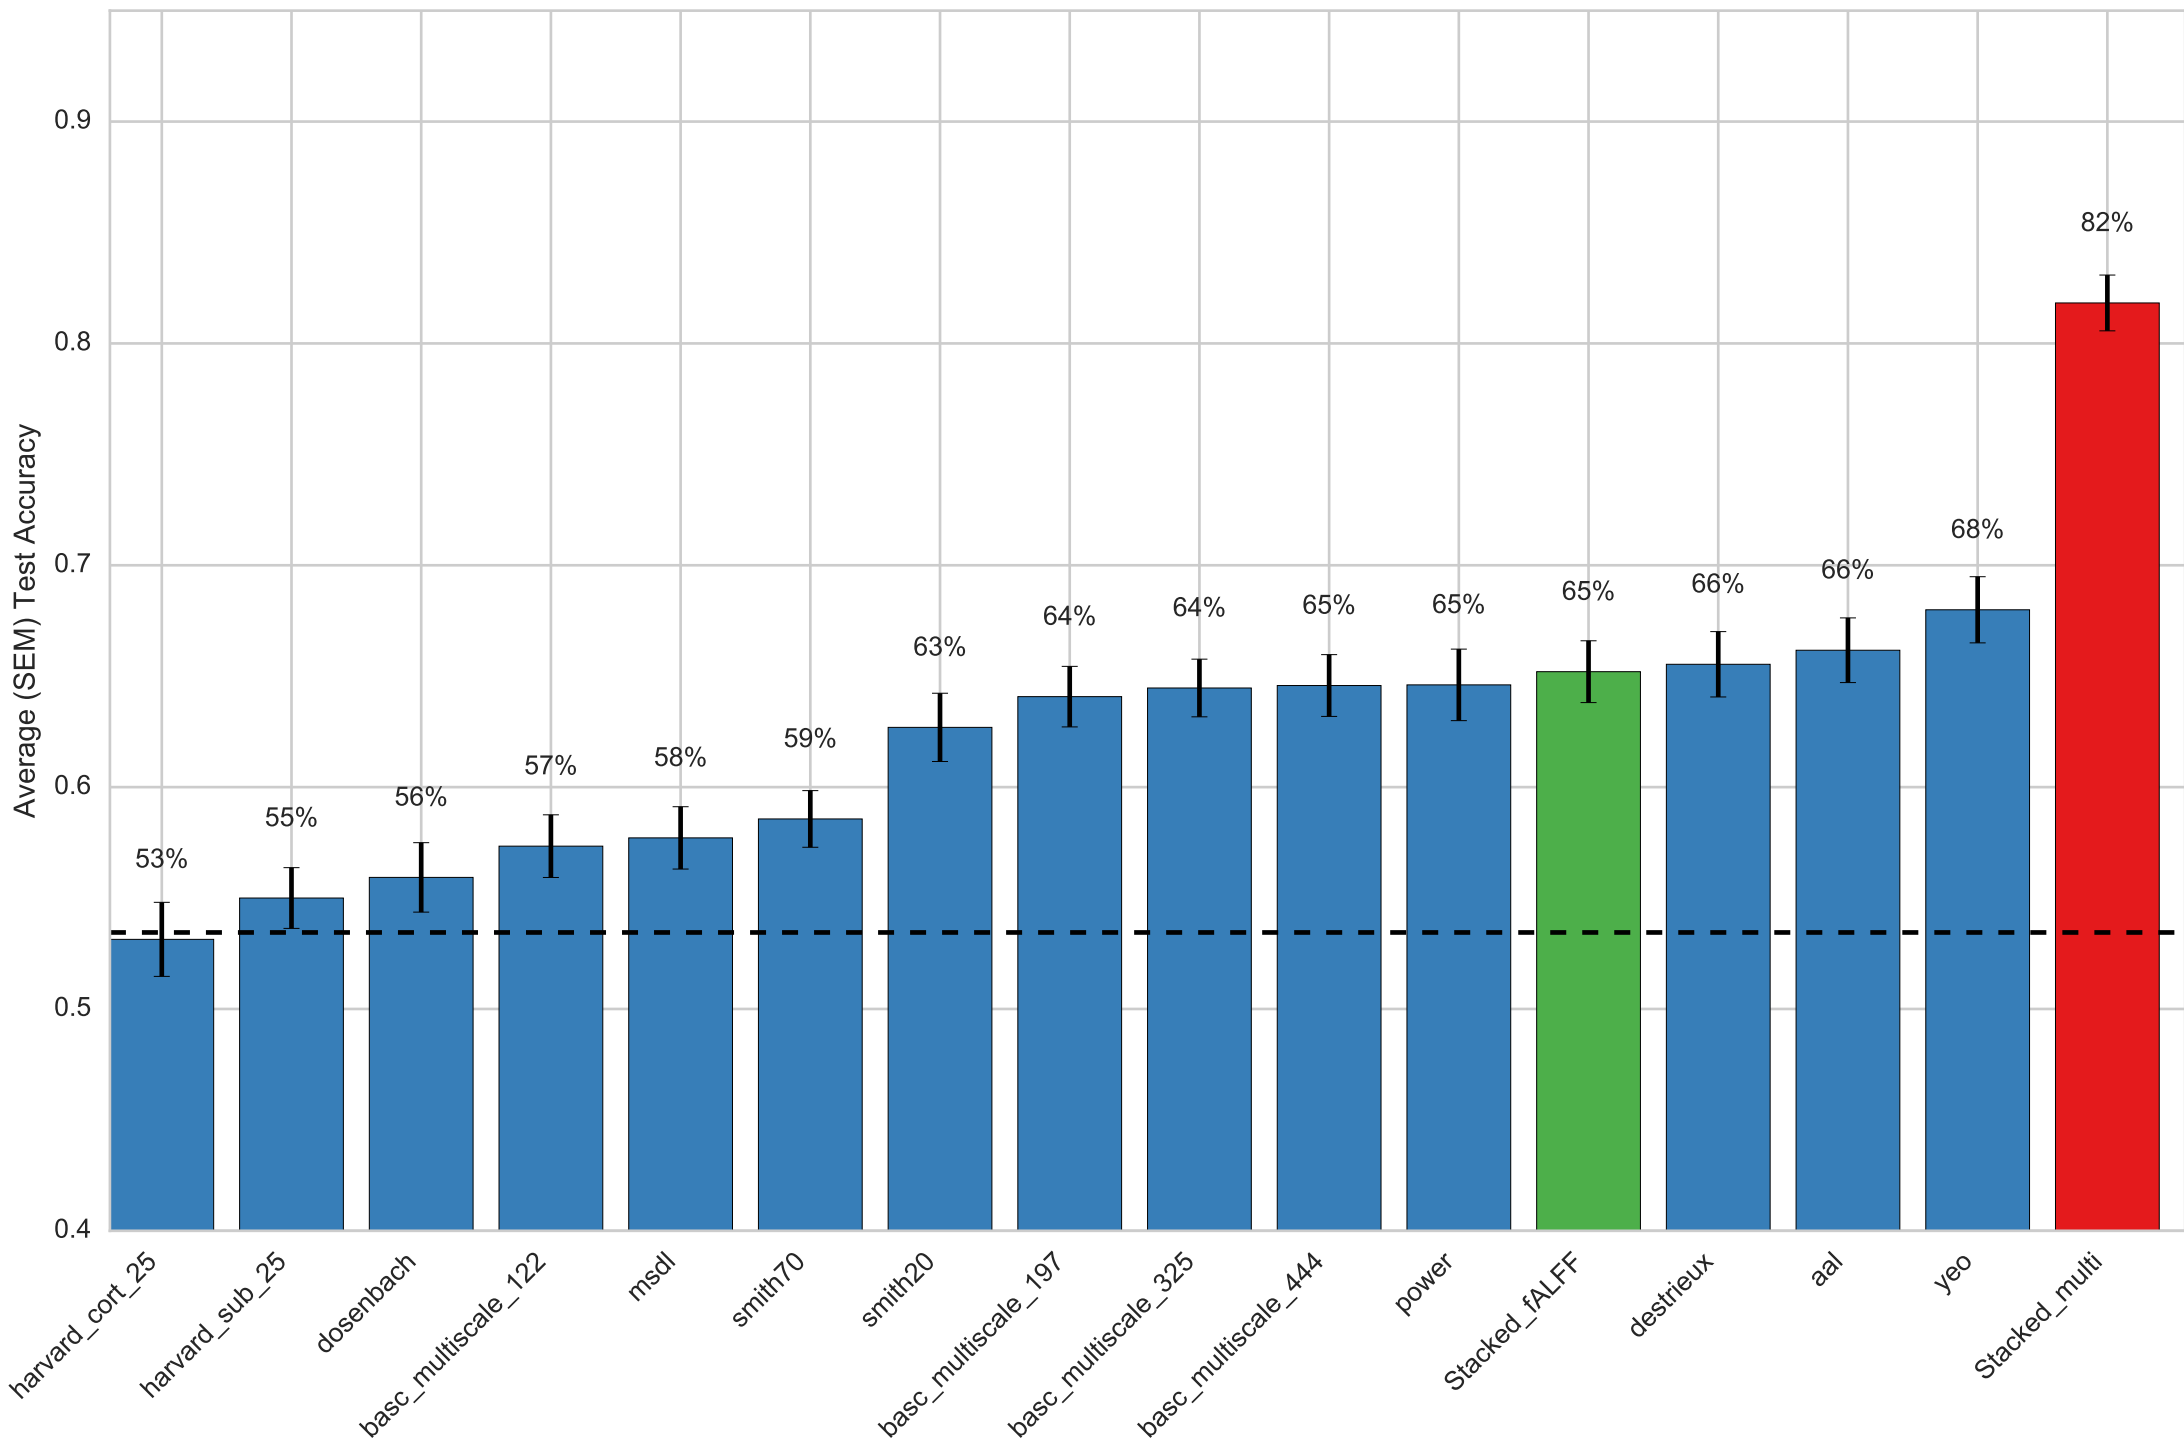

FC\_corr : Top 0.5% Feature Selection  
Comparison across 14 parcellations and stacked predictions  
10 fold cross-validation - 5 shuffled iterations

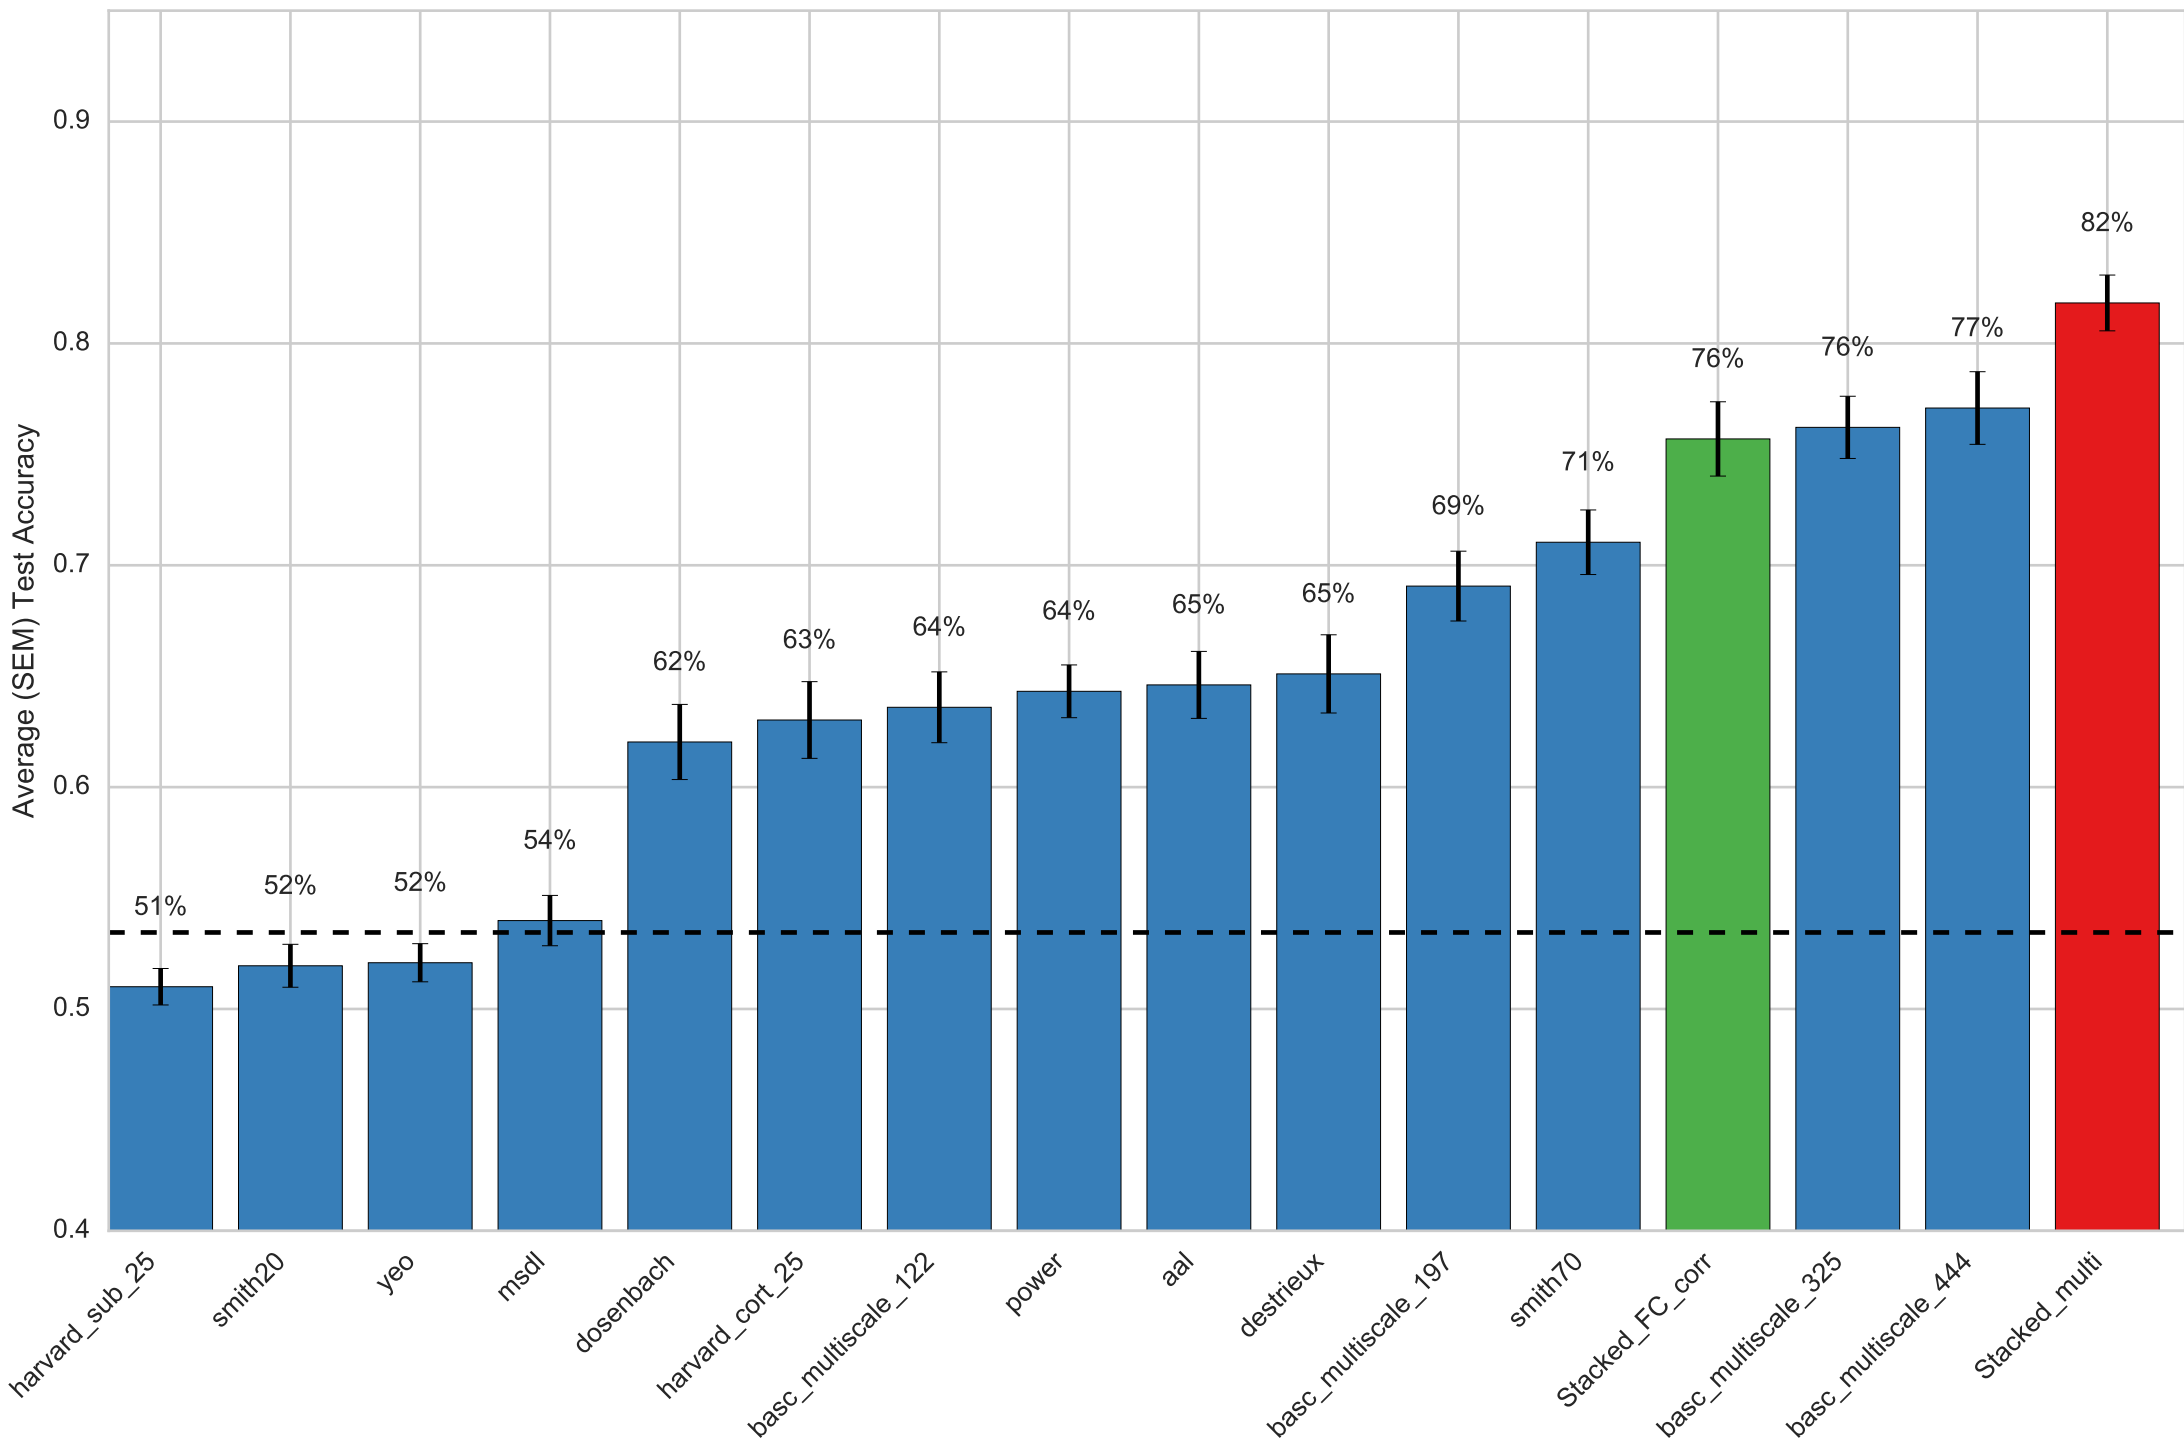

FC\_part : Top 0.5% Feature Selection  
Comparison across 14 parcellations and stacked predictions  
10 fold cross-validation - 5 shuffled iterations

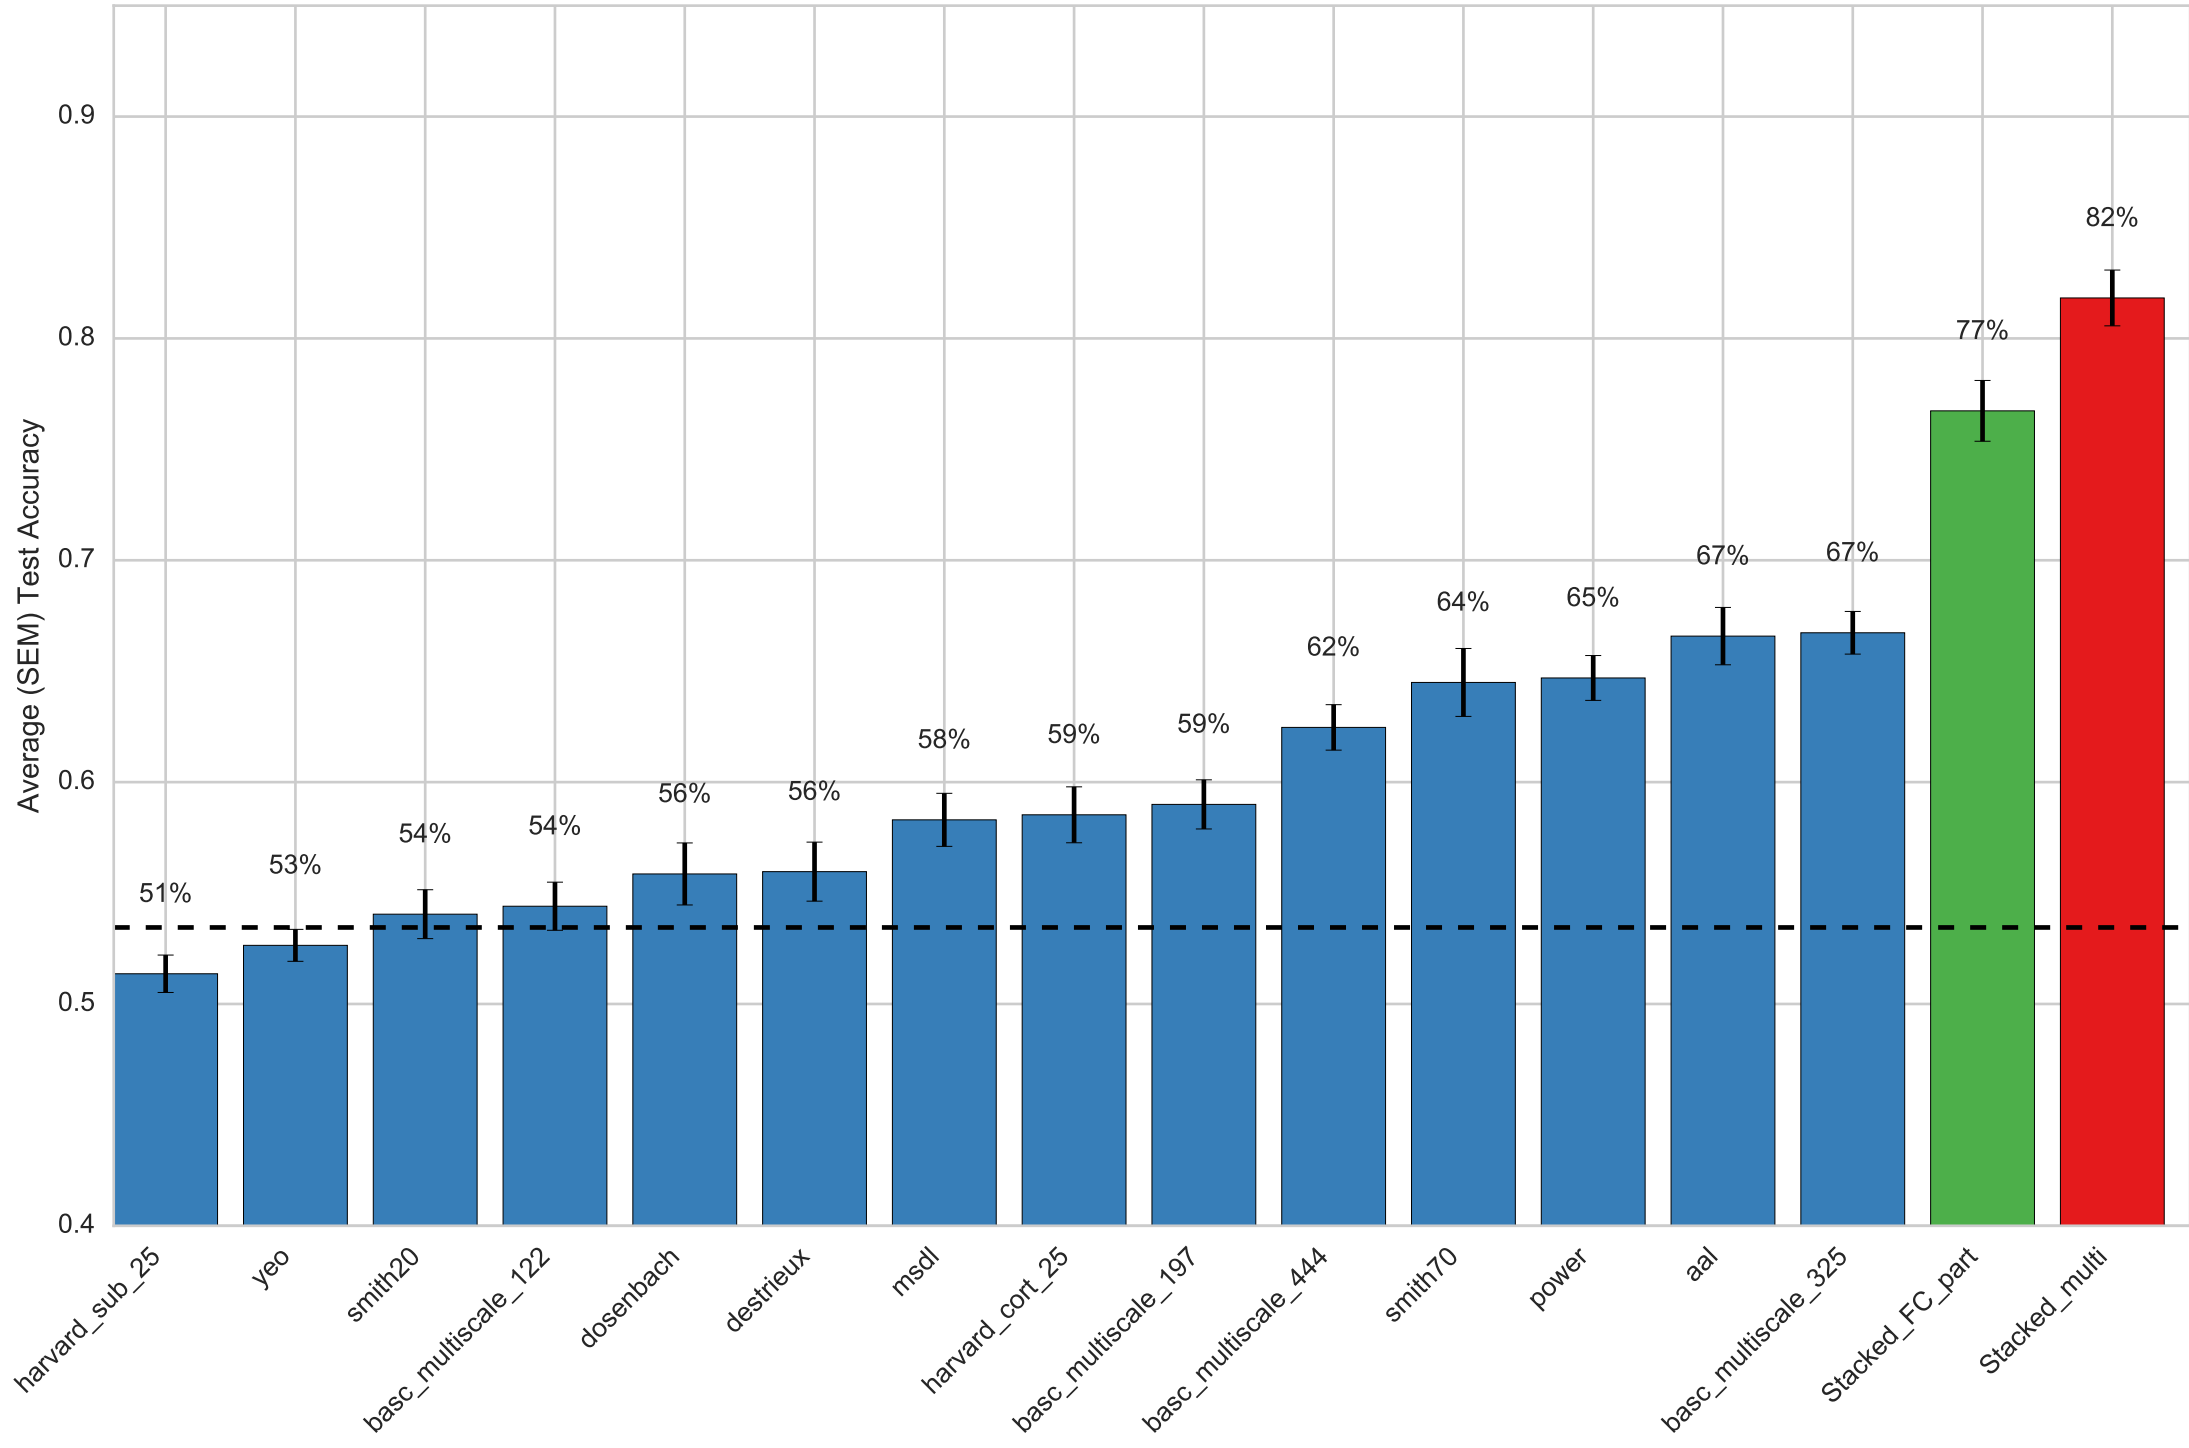

FC\_prec : Top 0.5% Feature Selection  
Comparison across 14 parcellations and stacked predictions  
10 fold cross-validation - 5 shuffled iterations

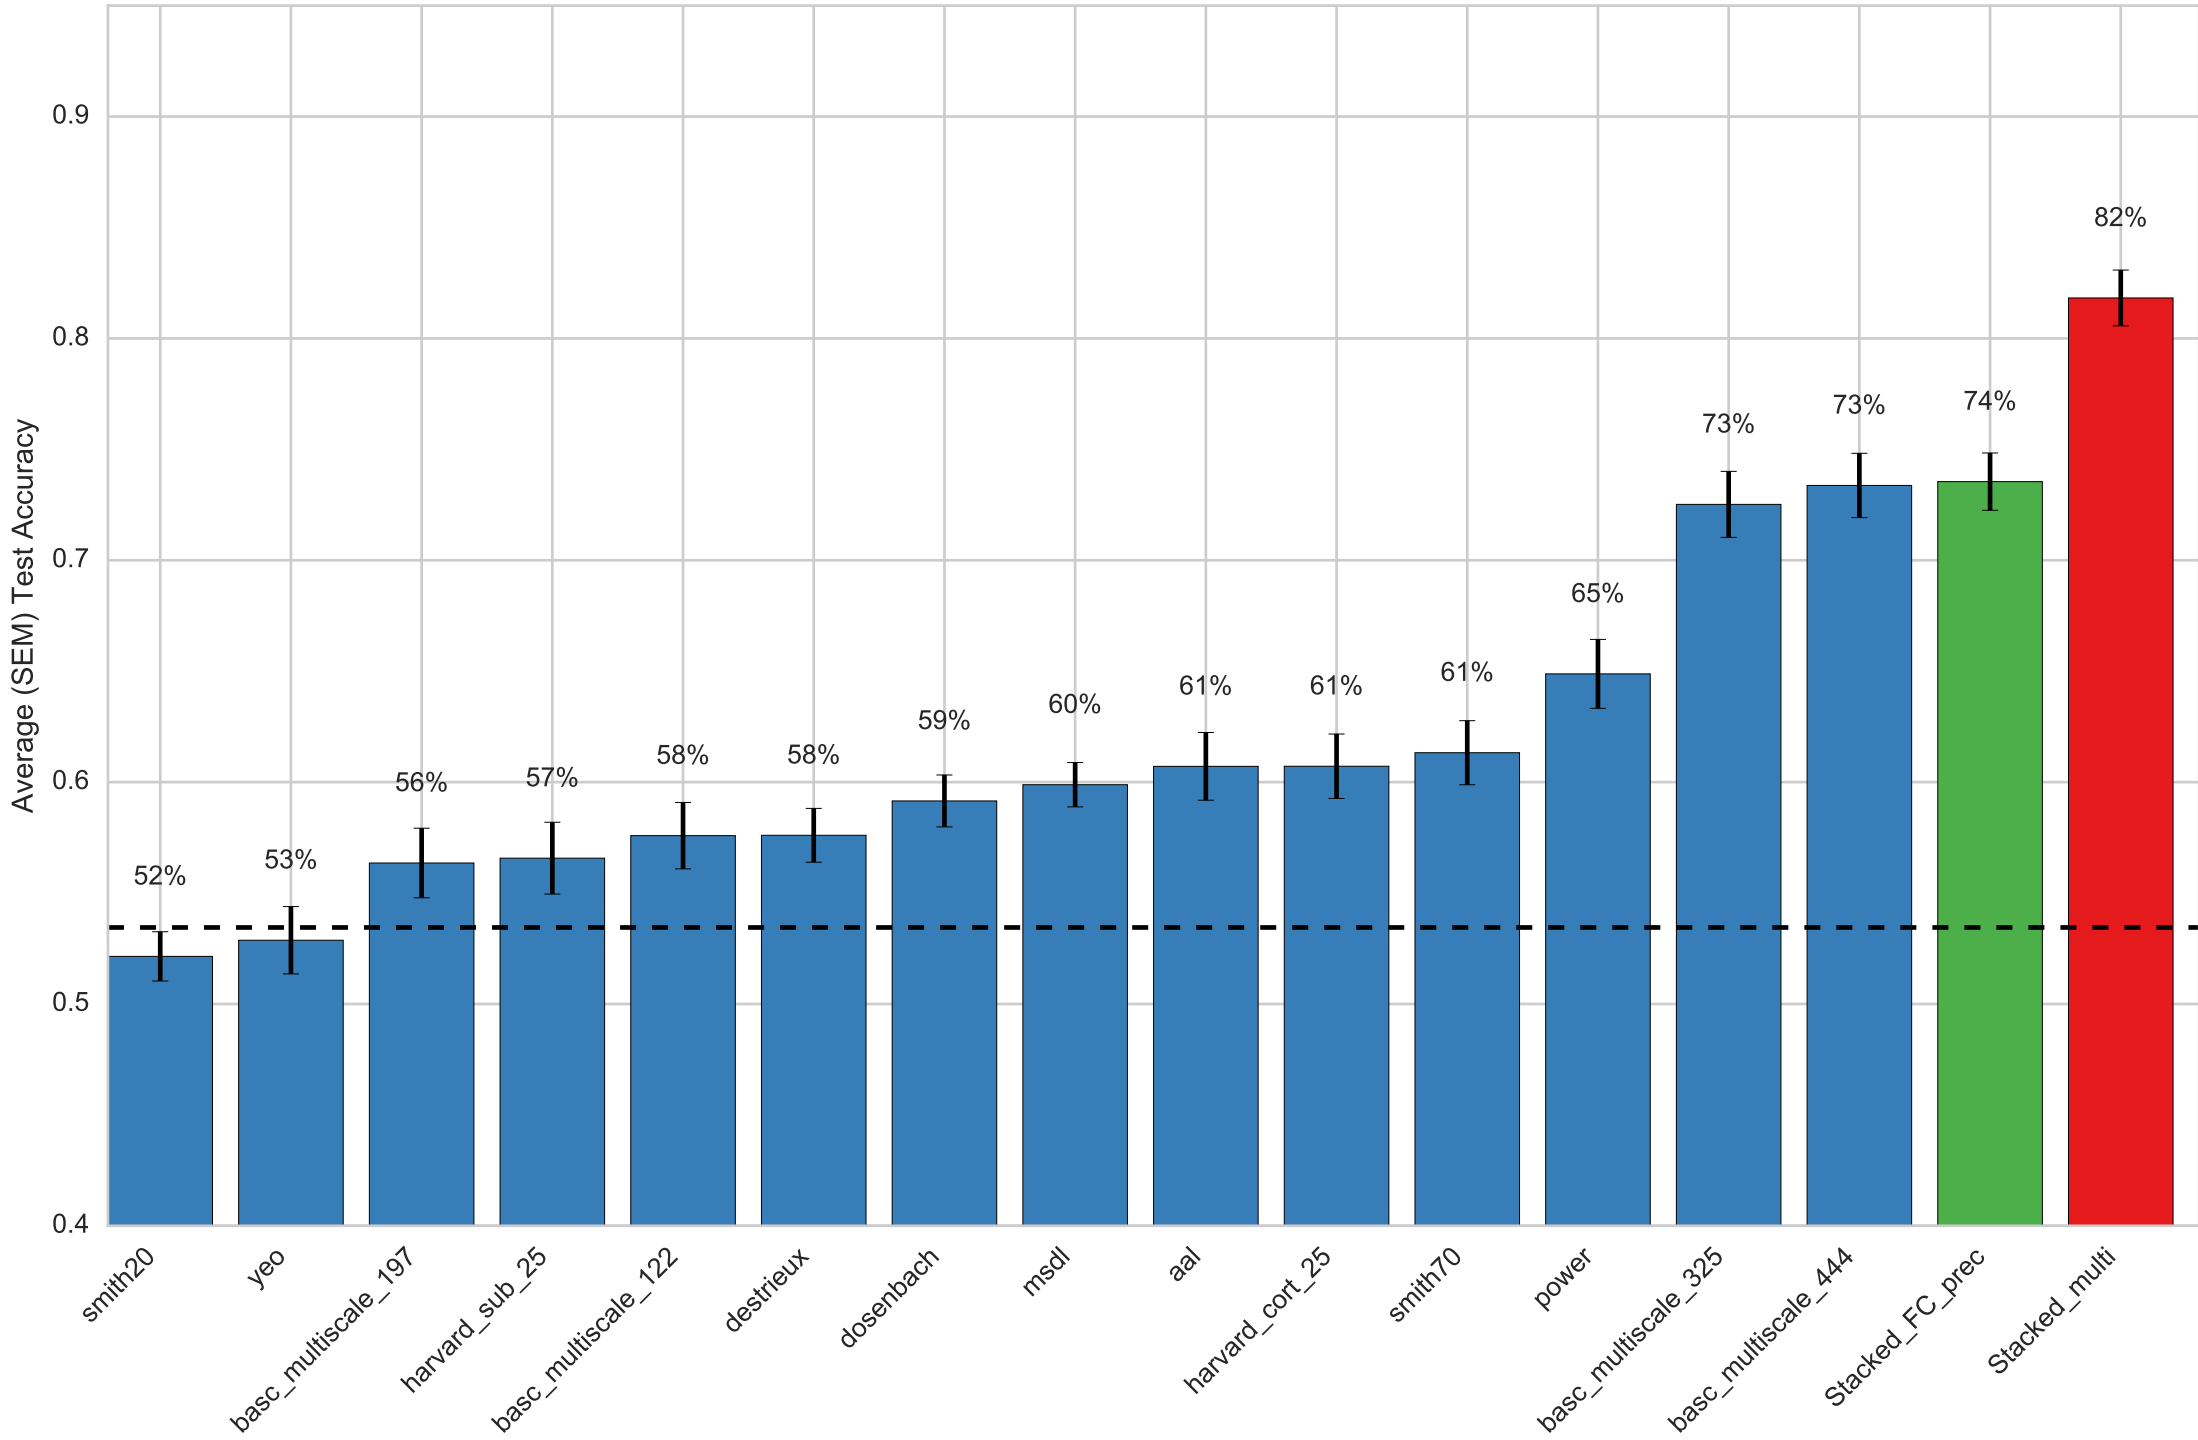

ReHo : Top 0.5% Feature Selection  
Comparison across 14 parcellations and stacked predictions  
10 fold cross-validation - 5 shuffled iterations

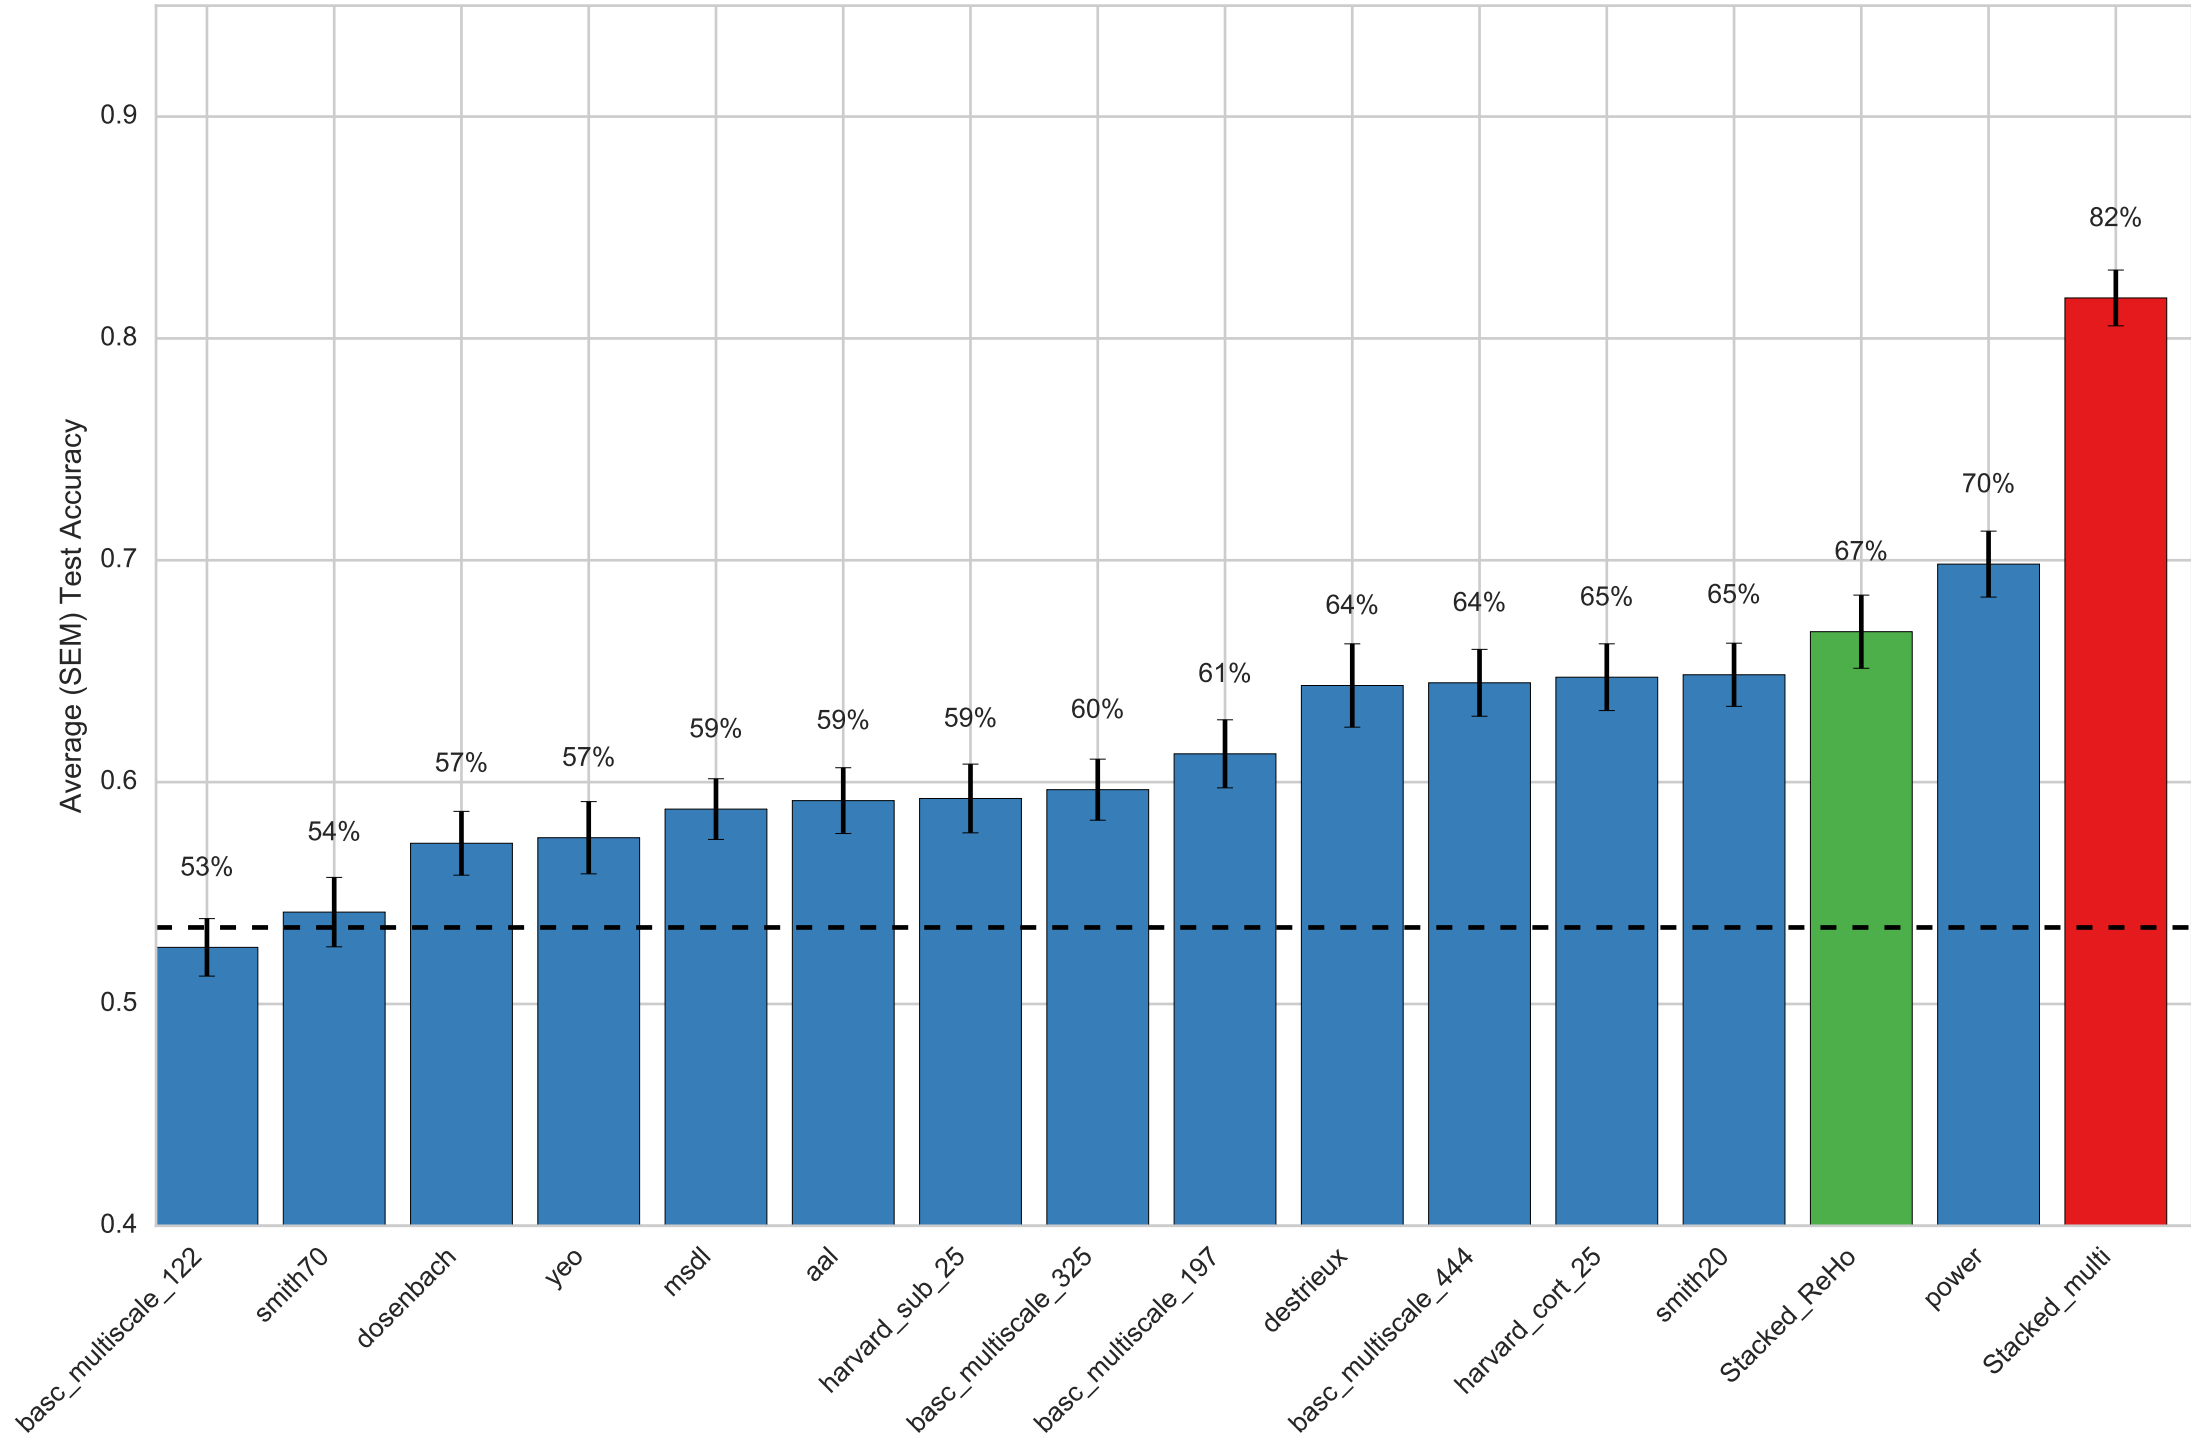



ALFF : Top 0.5% Feature Selection  
Comparison across 14 parcellations and stacked predictions  
10 fold cross-validation - 5 shuffled iterations

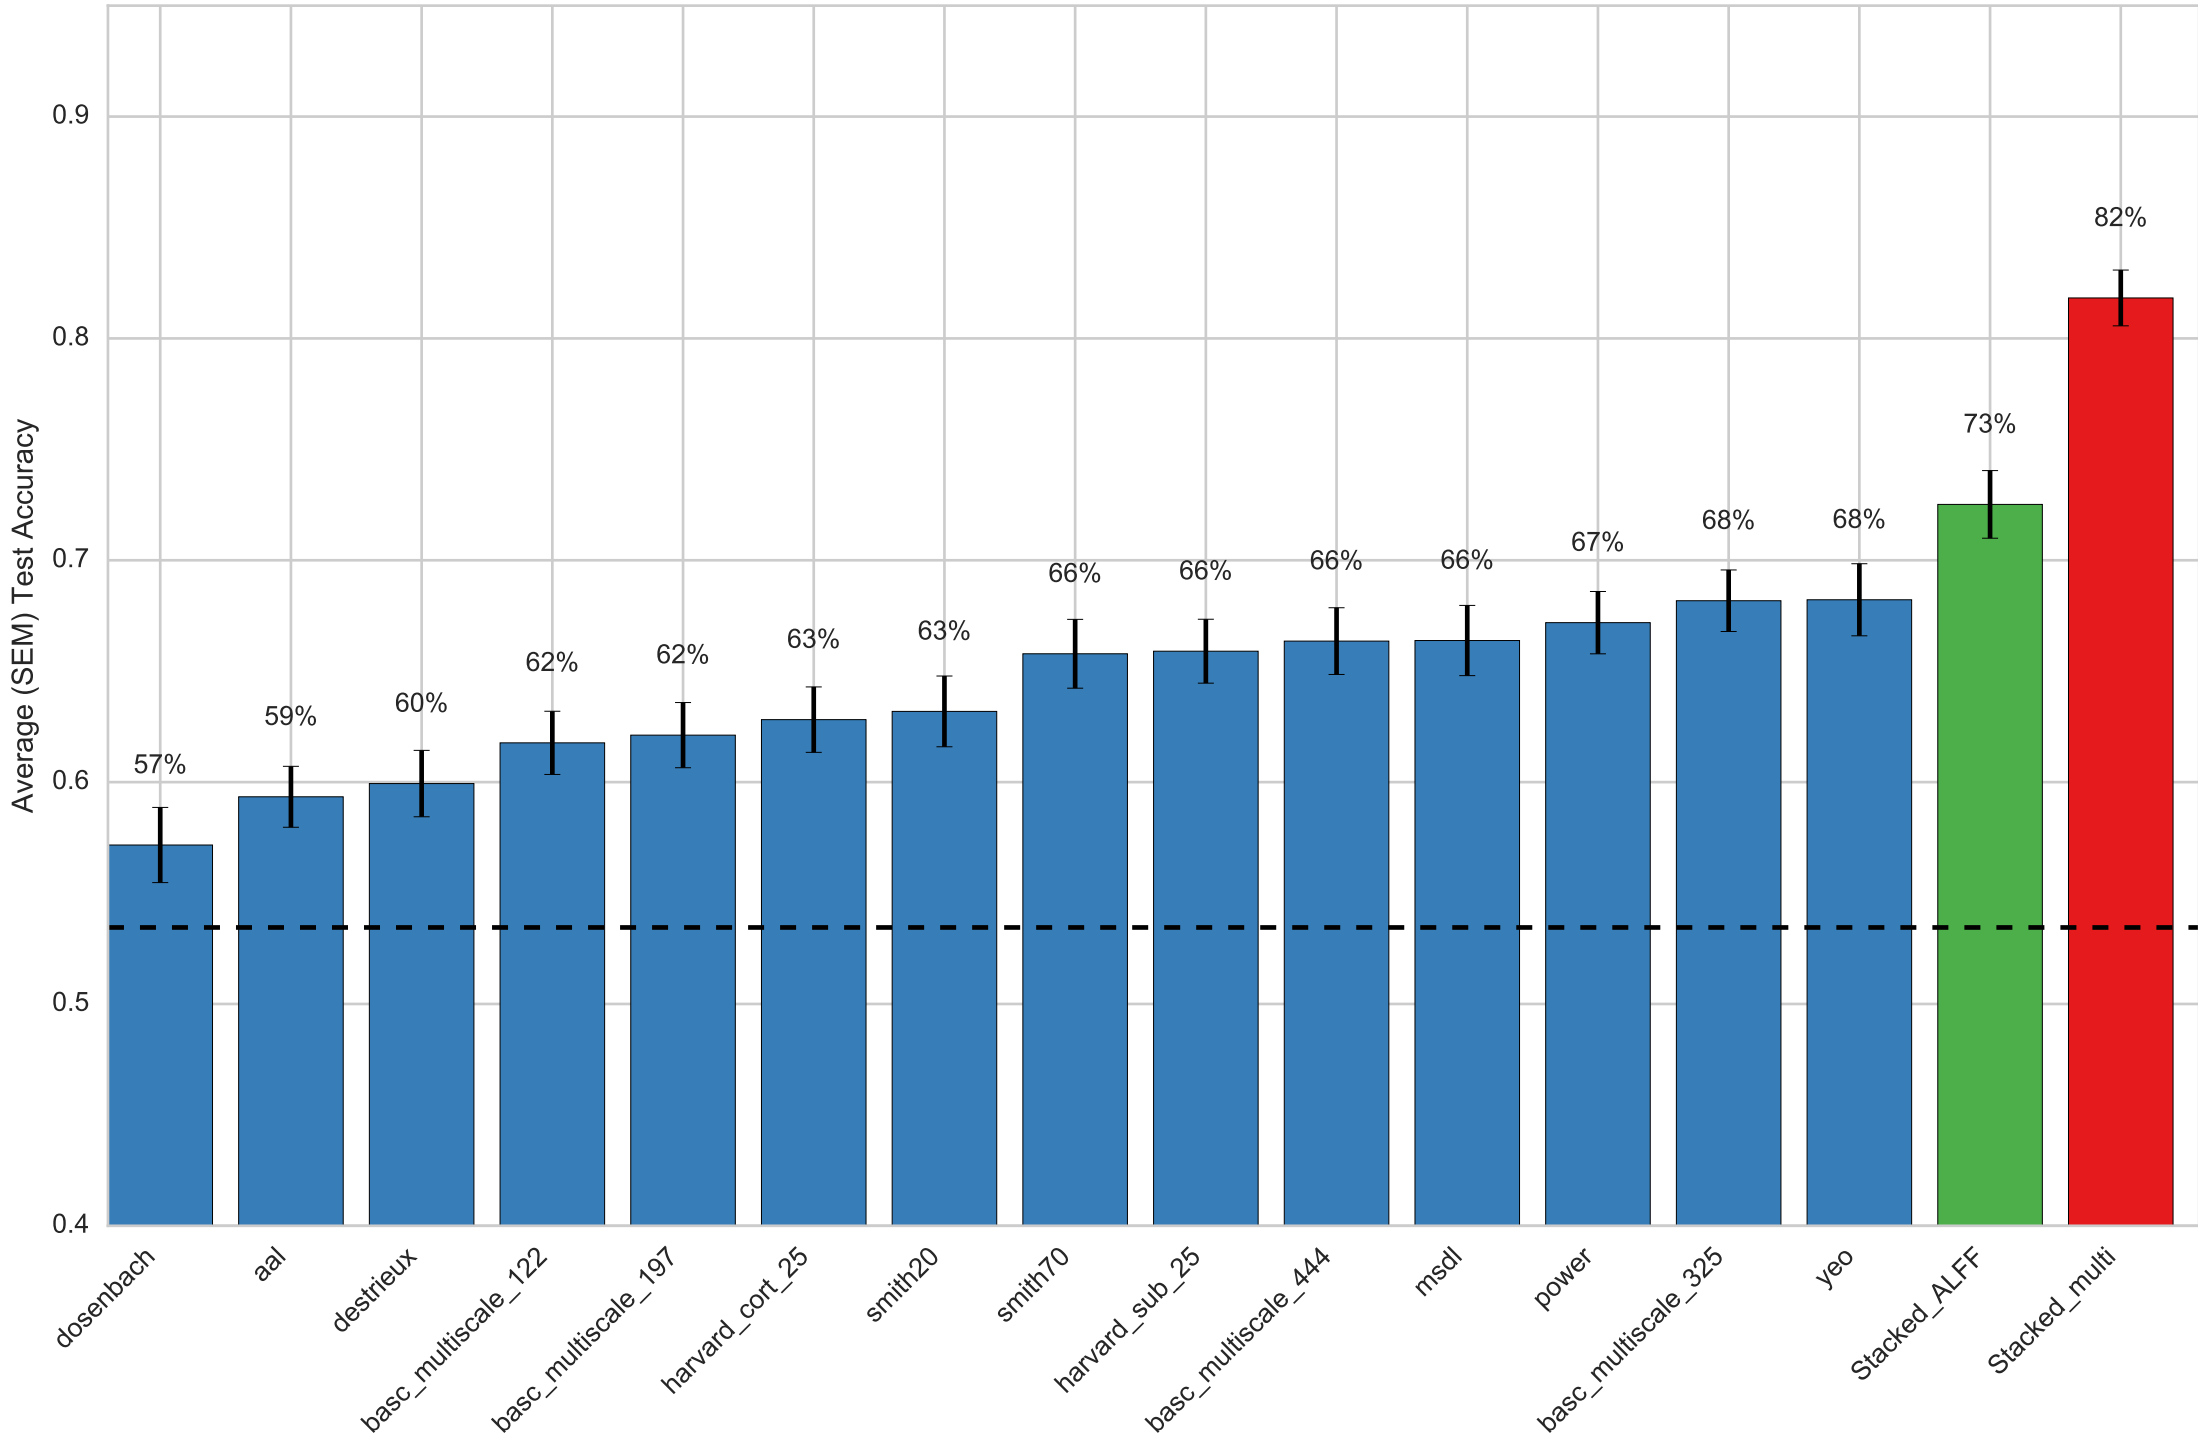

Feature selection / reduction method :Top 30% Feature Selection

fALFF : Top 30% Feature Selection  
Comparison across 14 parcellations and stacked predictions  
10 fold cross-validation - 5 shuffled iterations

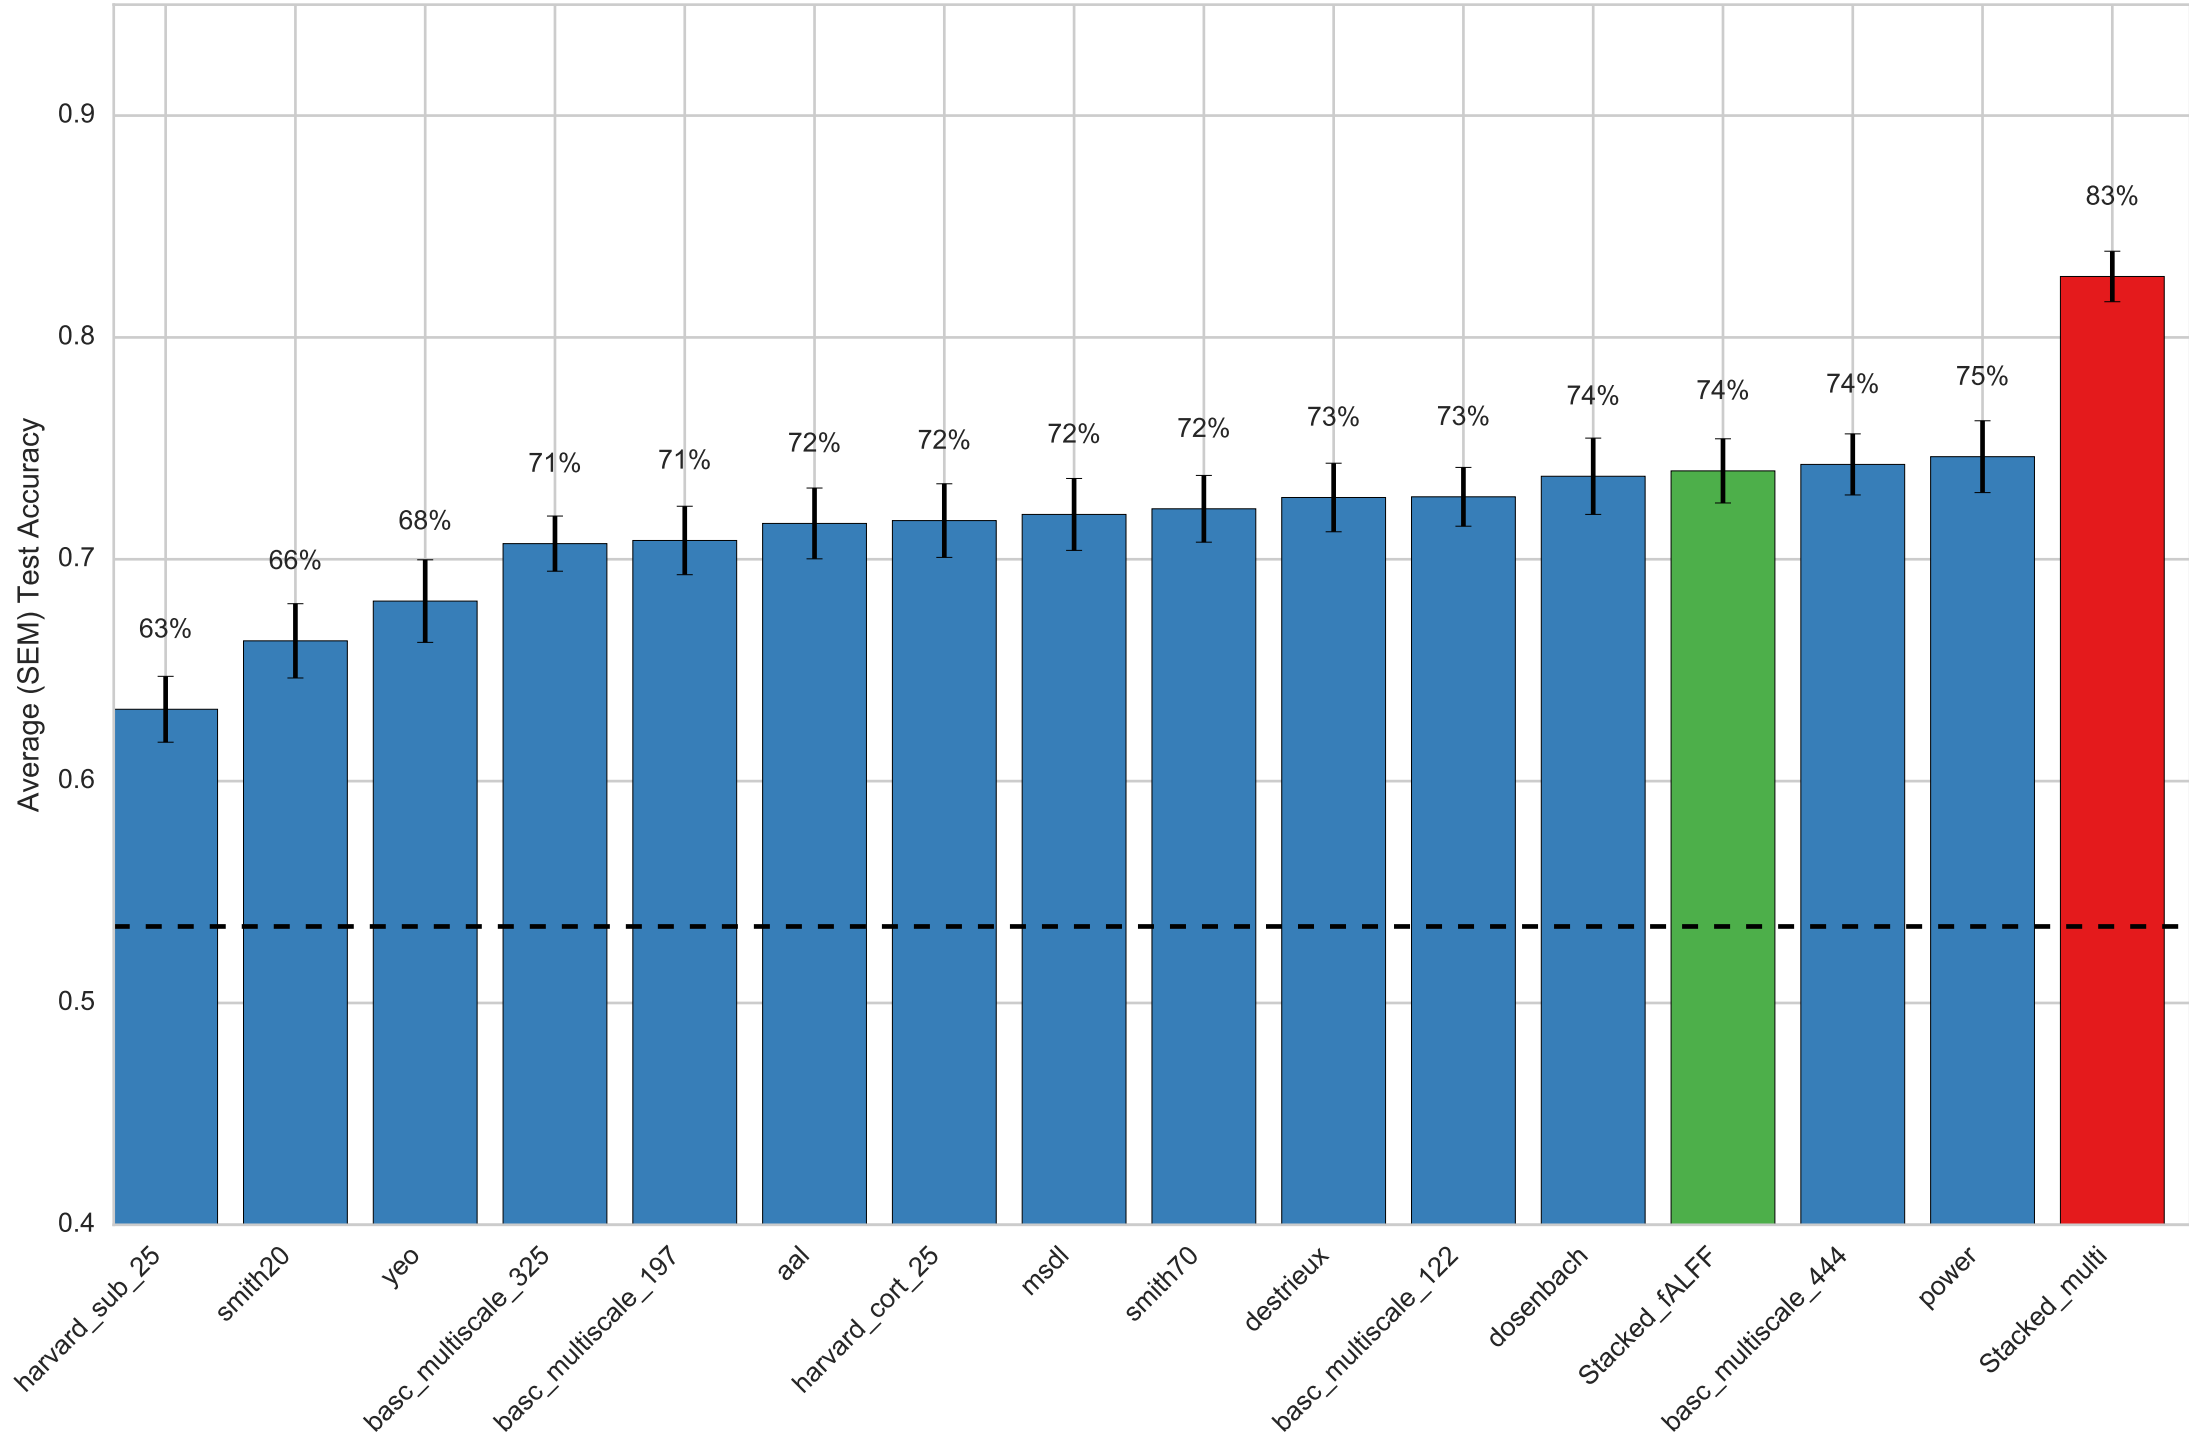

FC\_corr : Top 30% Feature Selection  
Comparison across 14 parcellations and stacked predictions  
10 fold cross-validation - 5 shuffled iterations

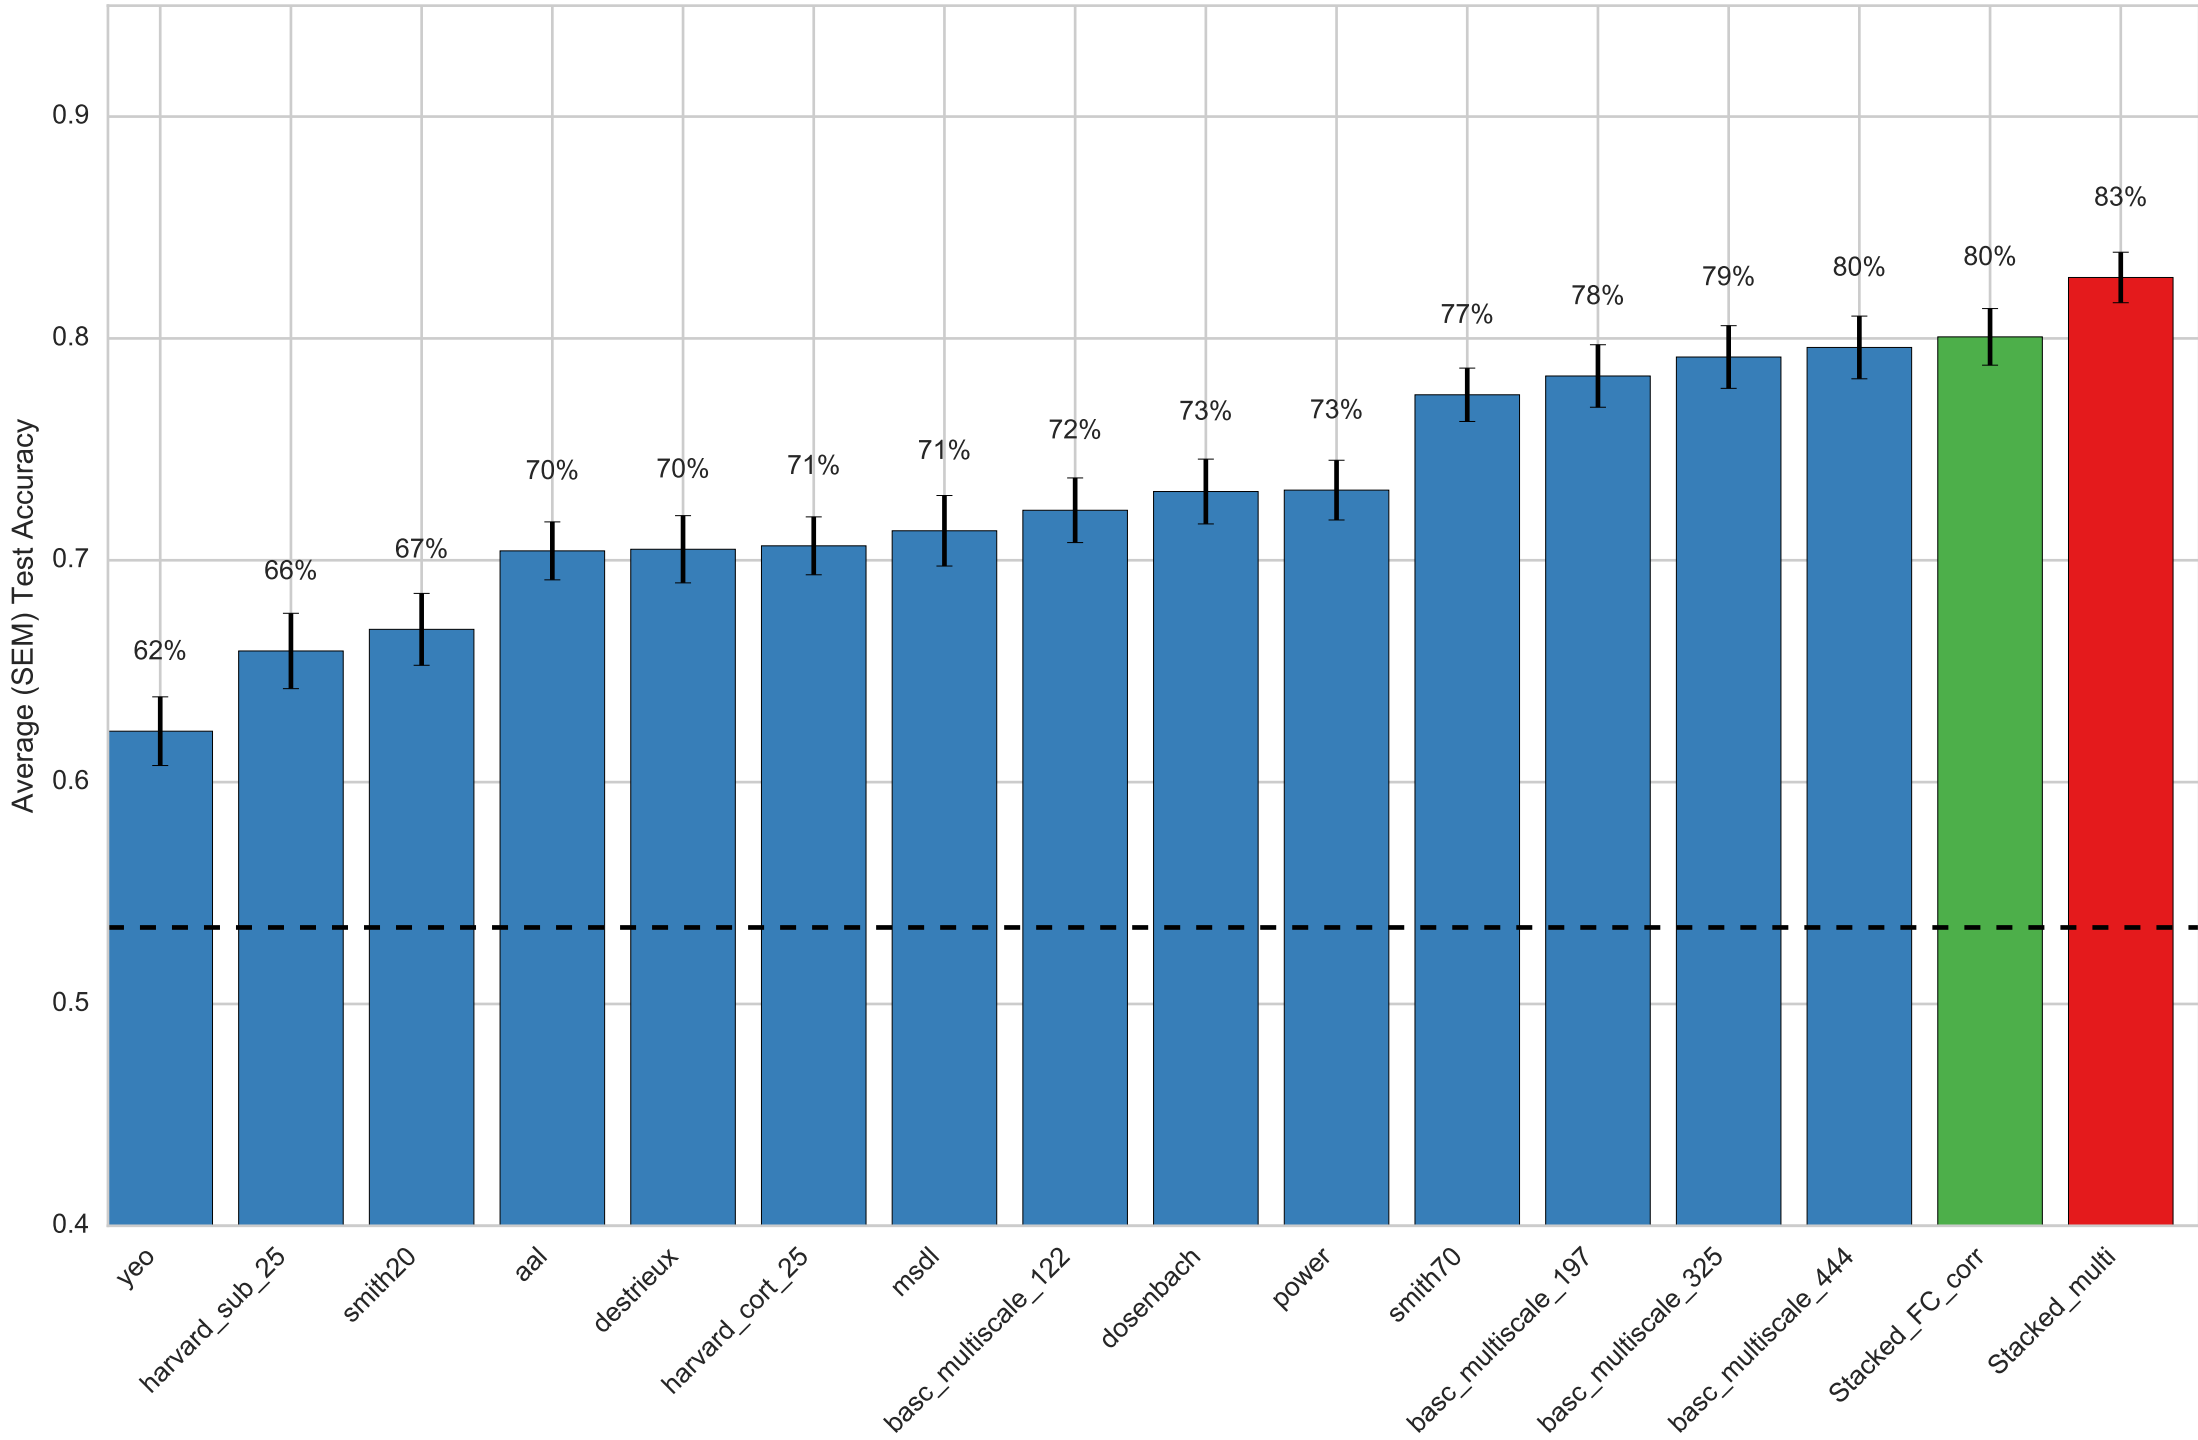

FC\_part : Top 30% Feature Selection  
Comparison across 14 parcellations and stacked predictions  
10 fold cross-validation - 5 shuffled iterations

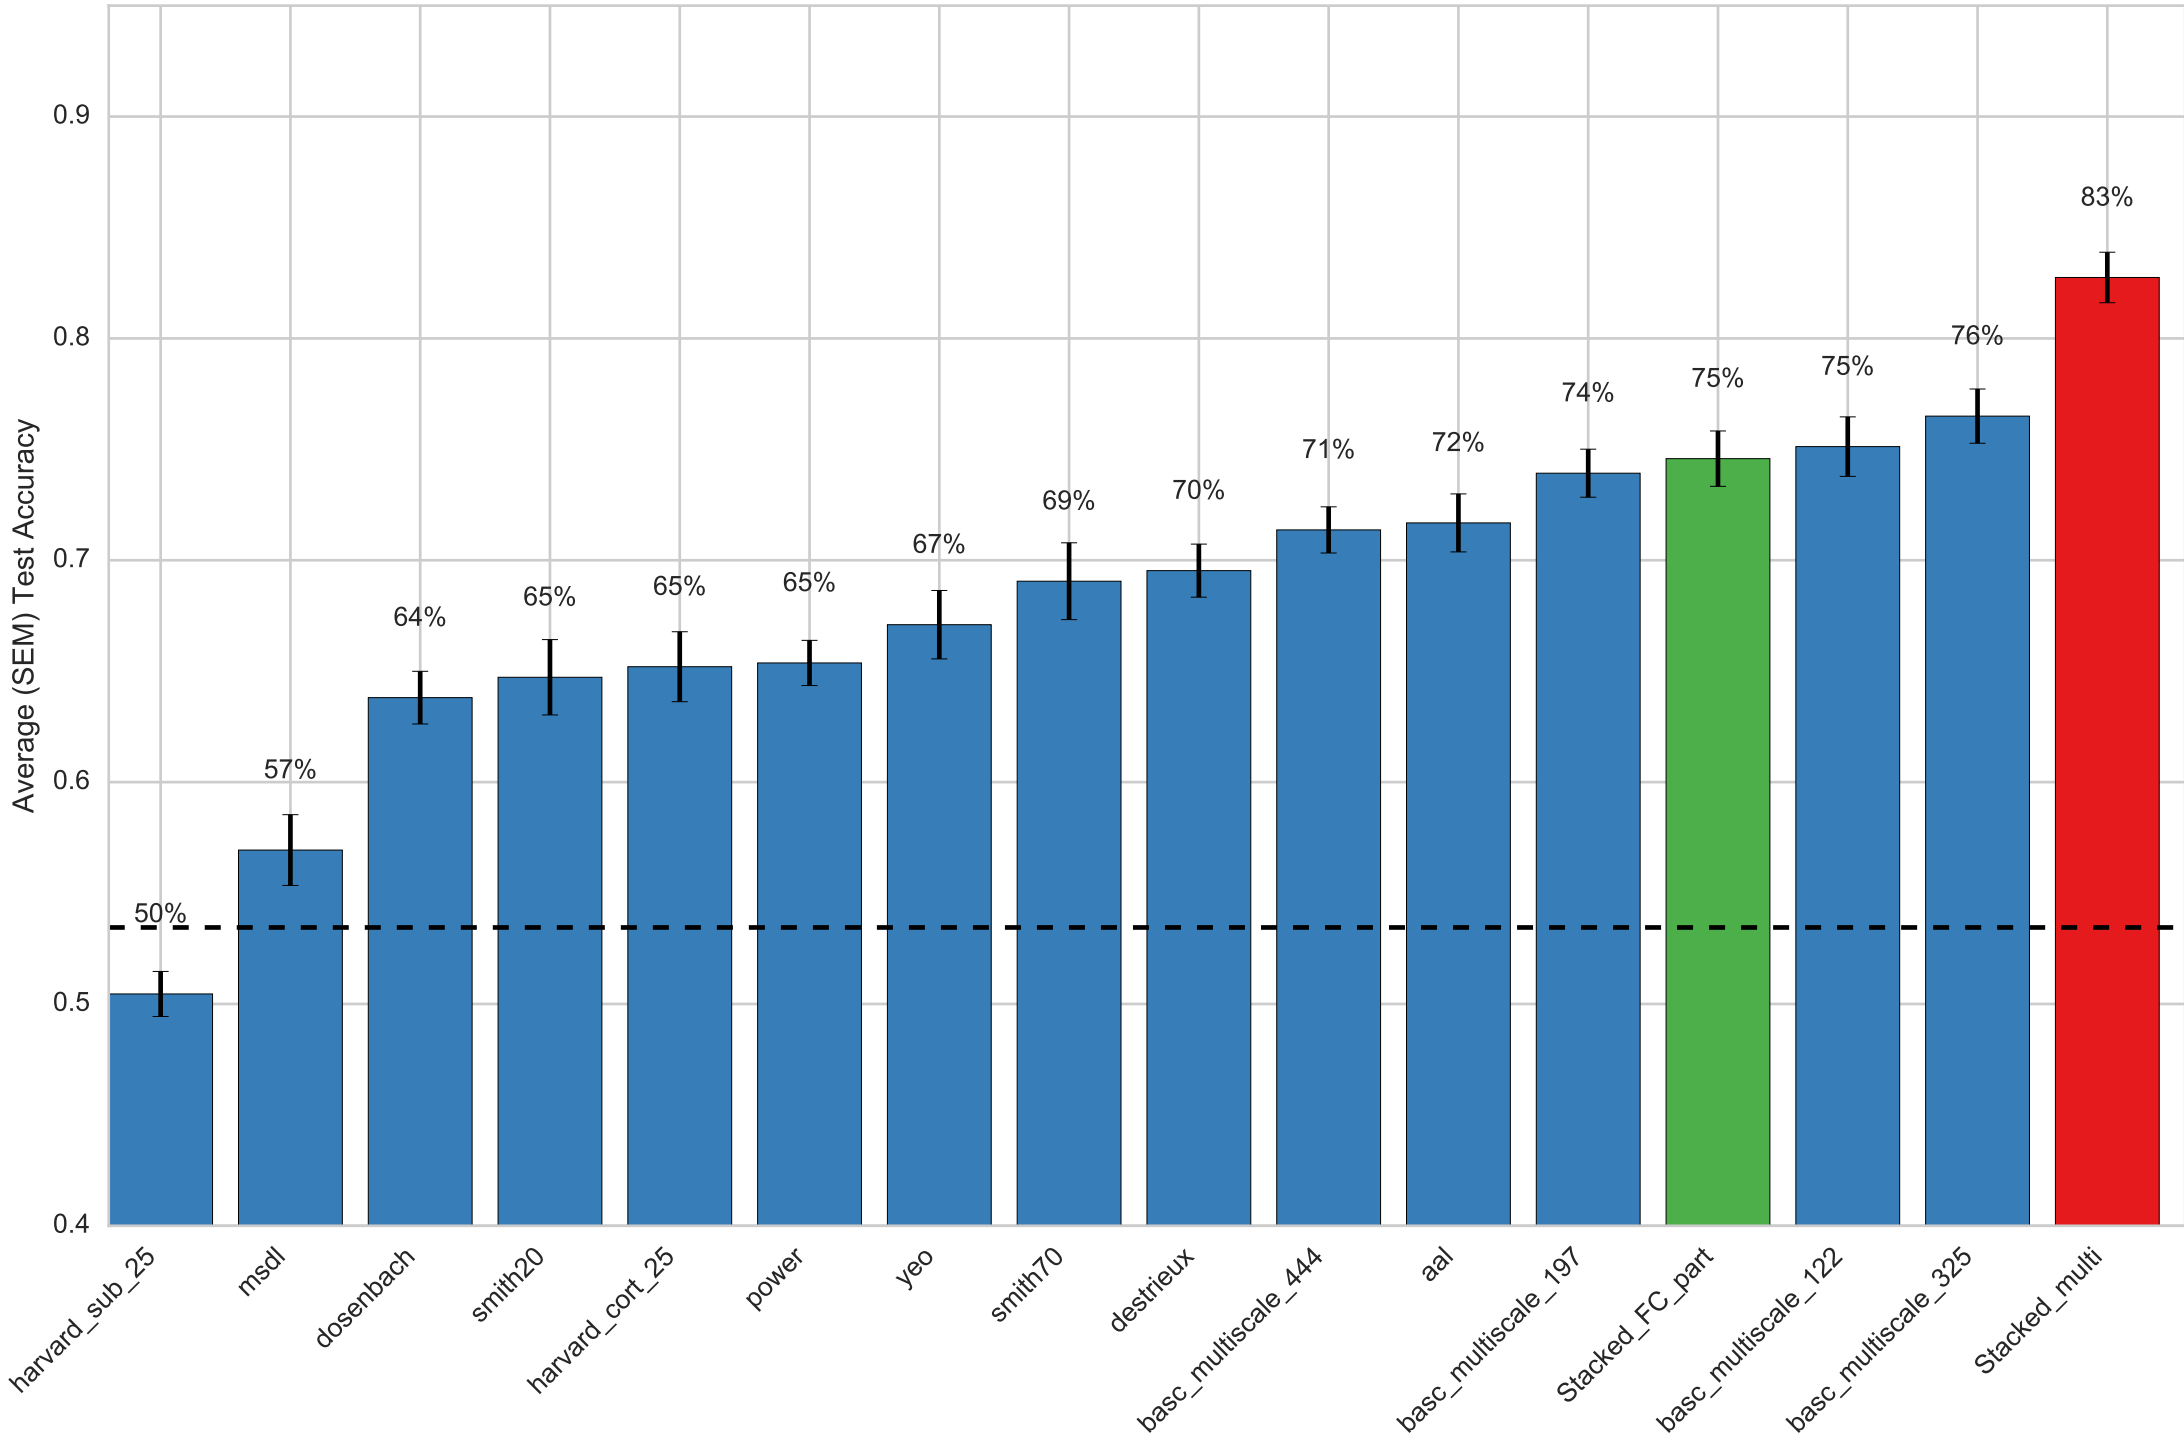

FC\_prec : Top 30% Feature Selection  
Comparison across 14 parcellations and stacked predictions  
10 fold cross-validation - 5 shuffled iterations

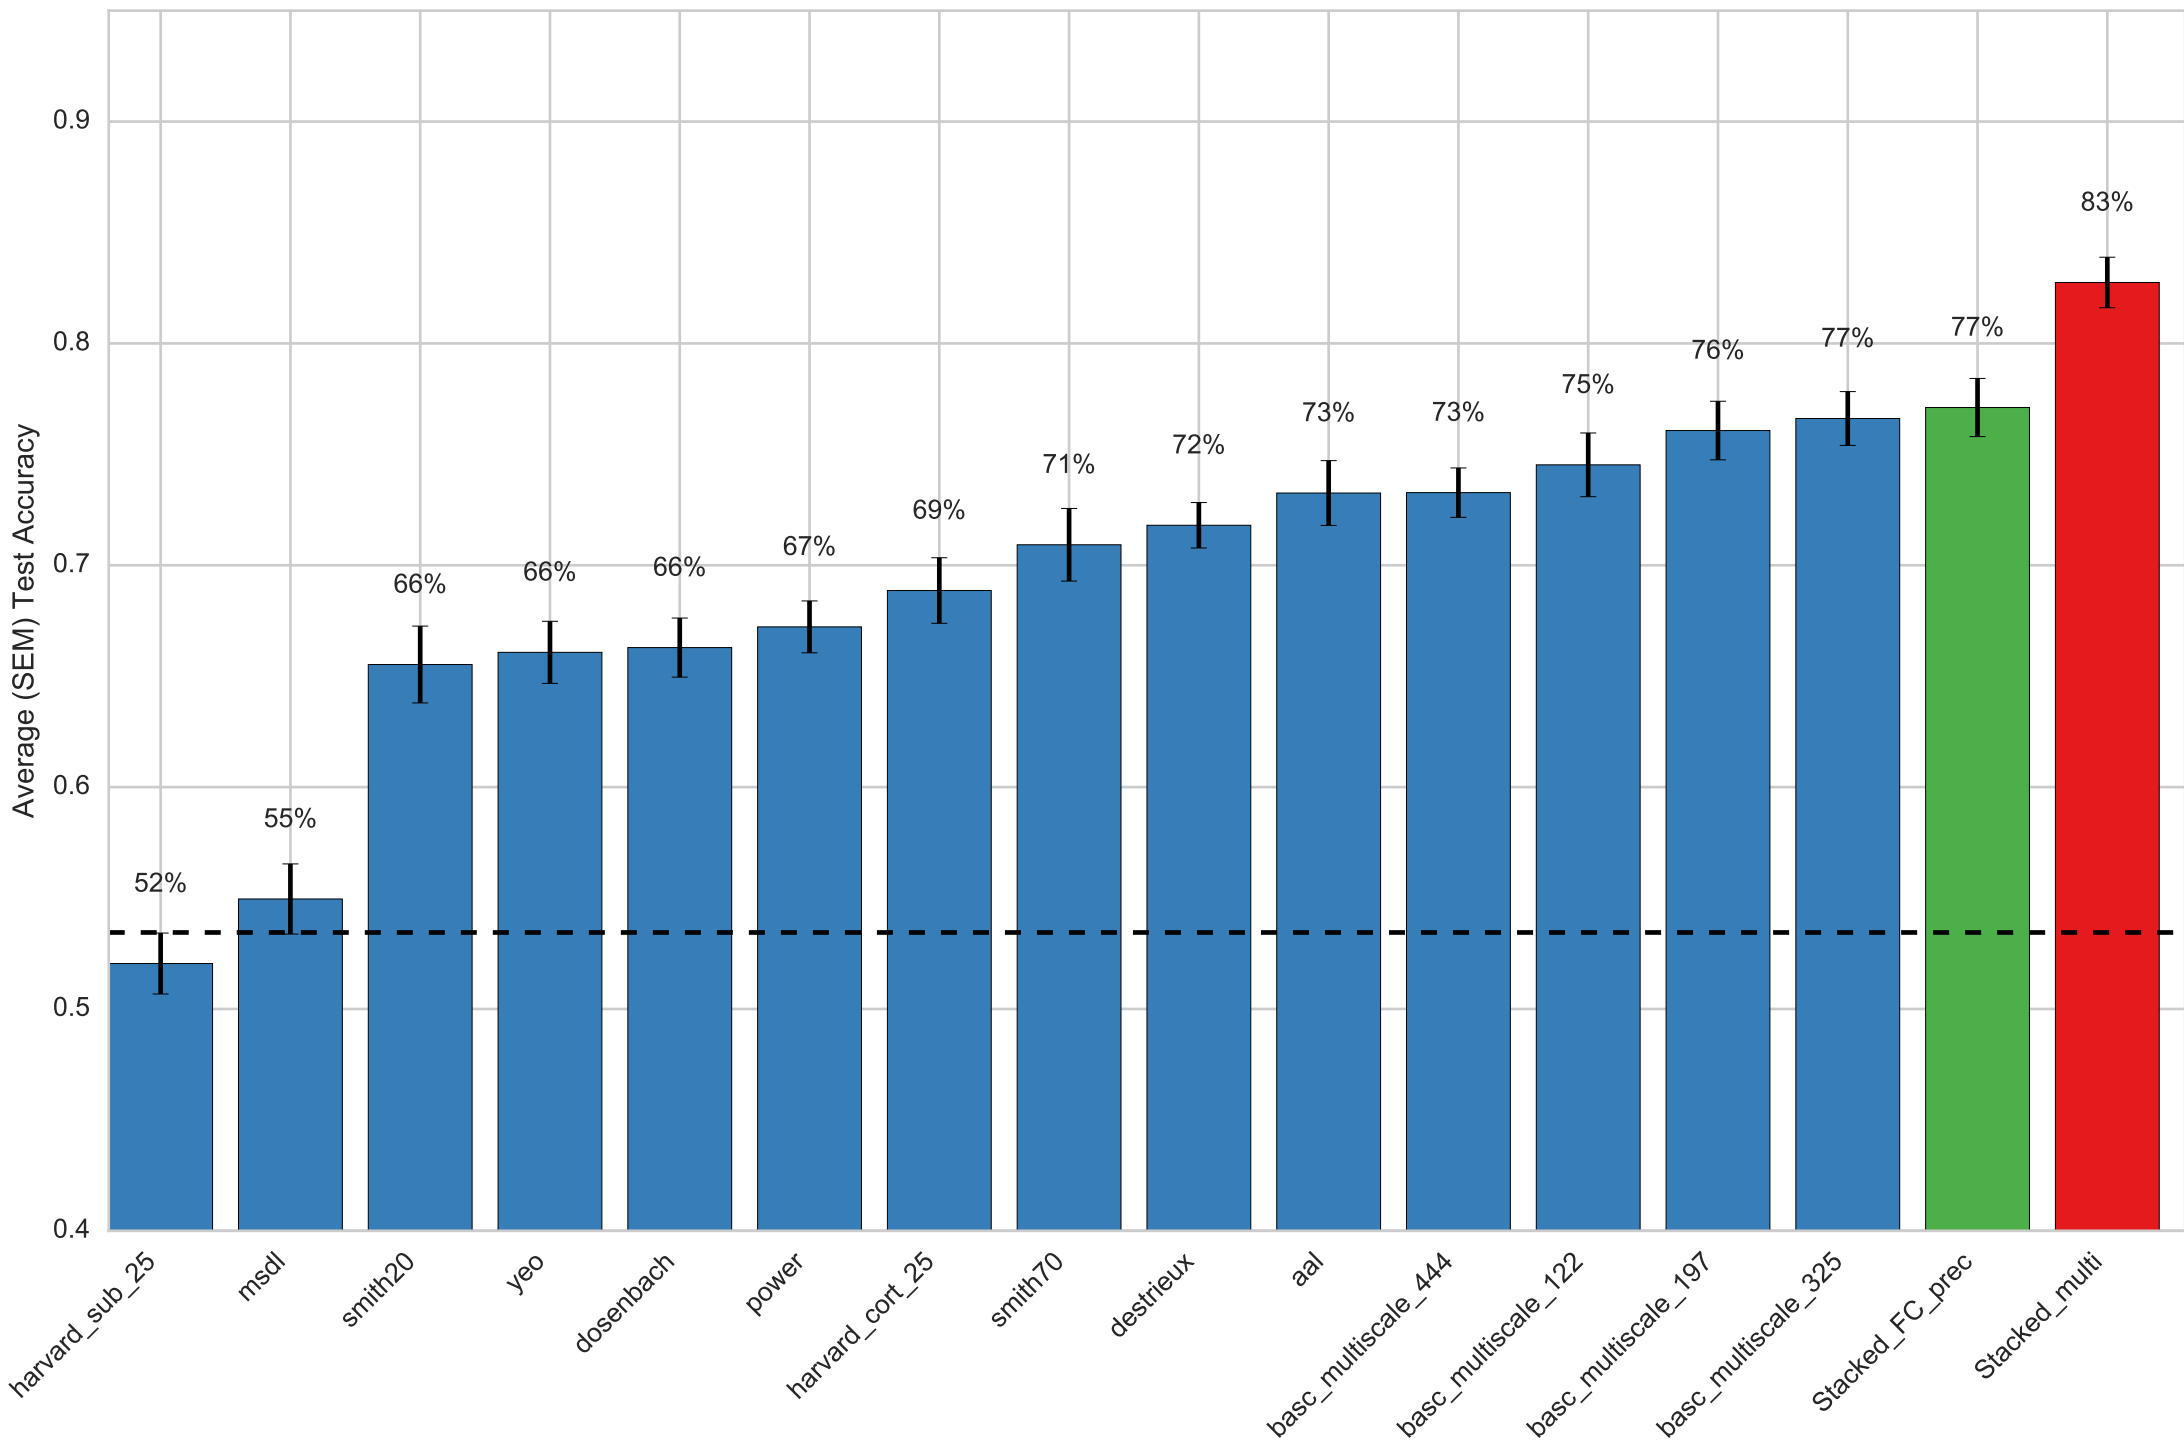

ReHo : Top 30% Feature Selection  
Comparison across 14 parcellations and stacked predictions  
10 fold cross-validation - 5 shuffled iterations

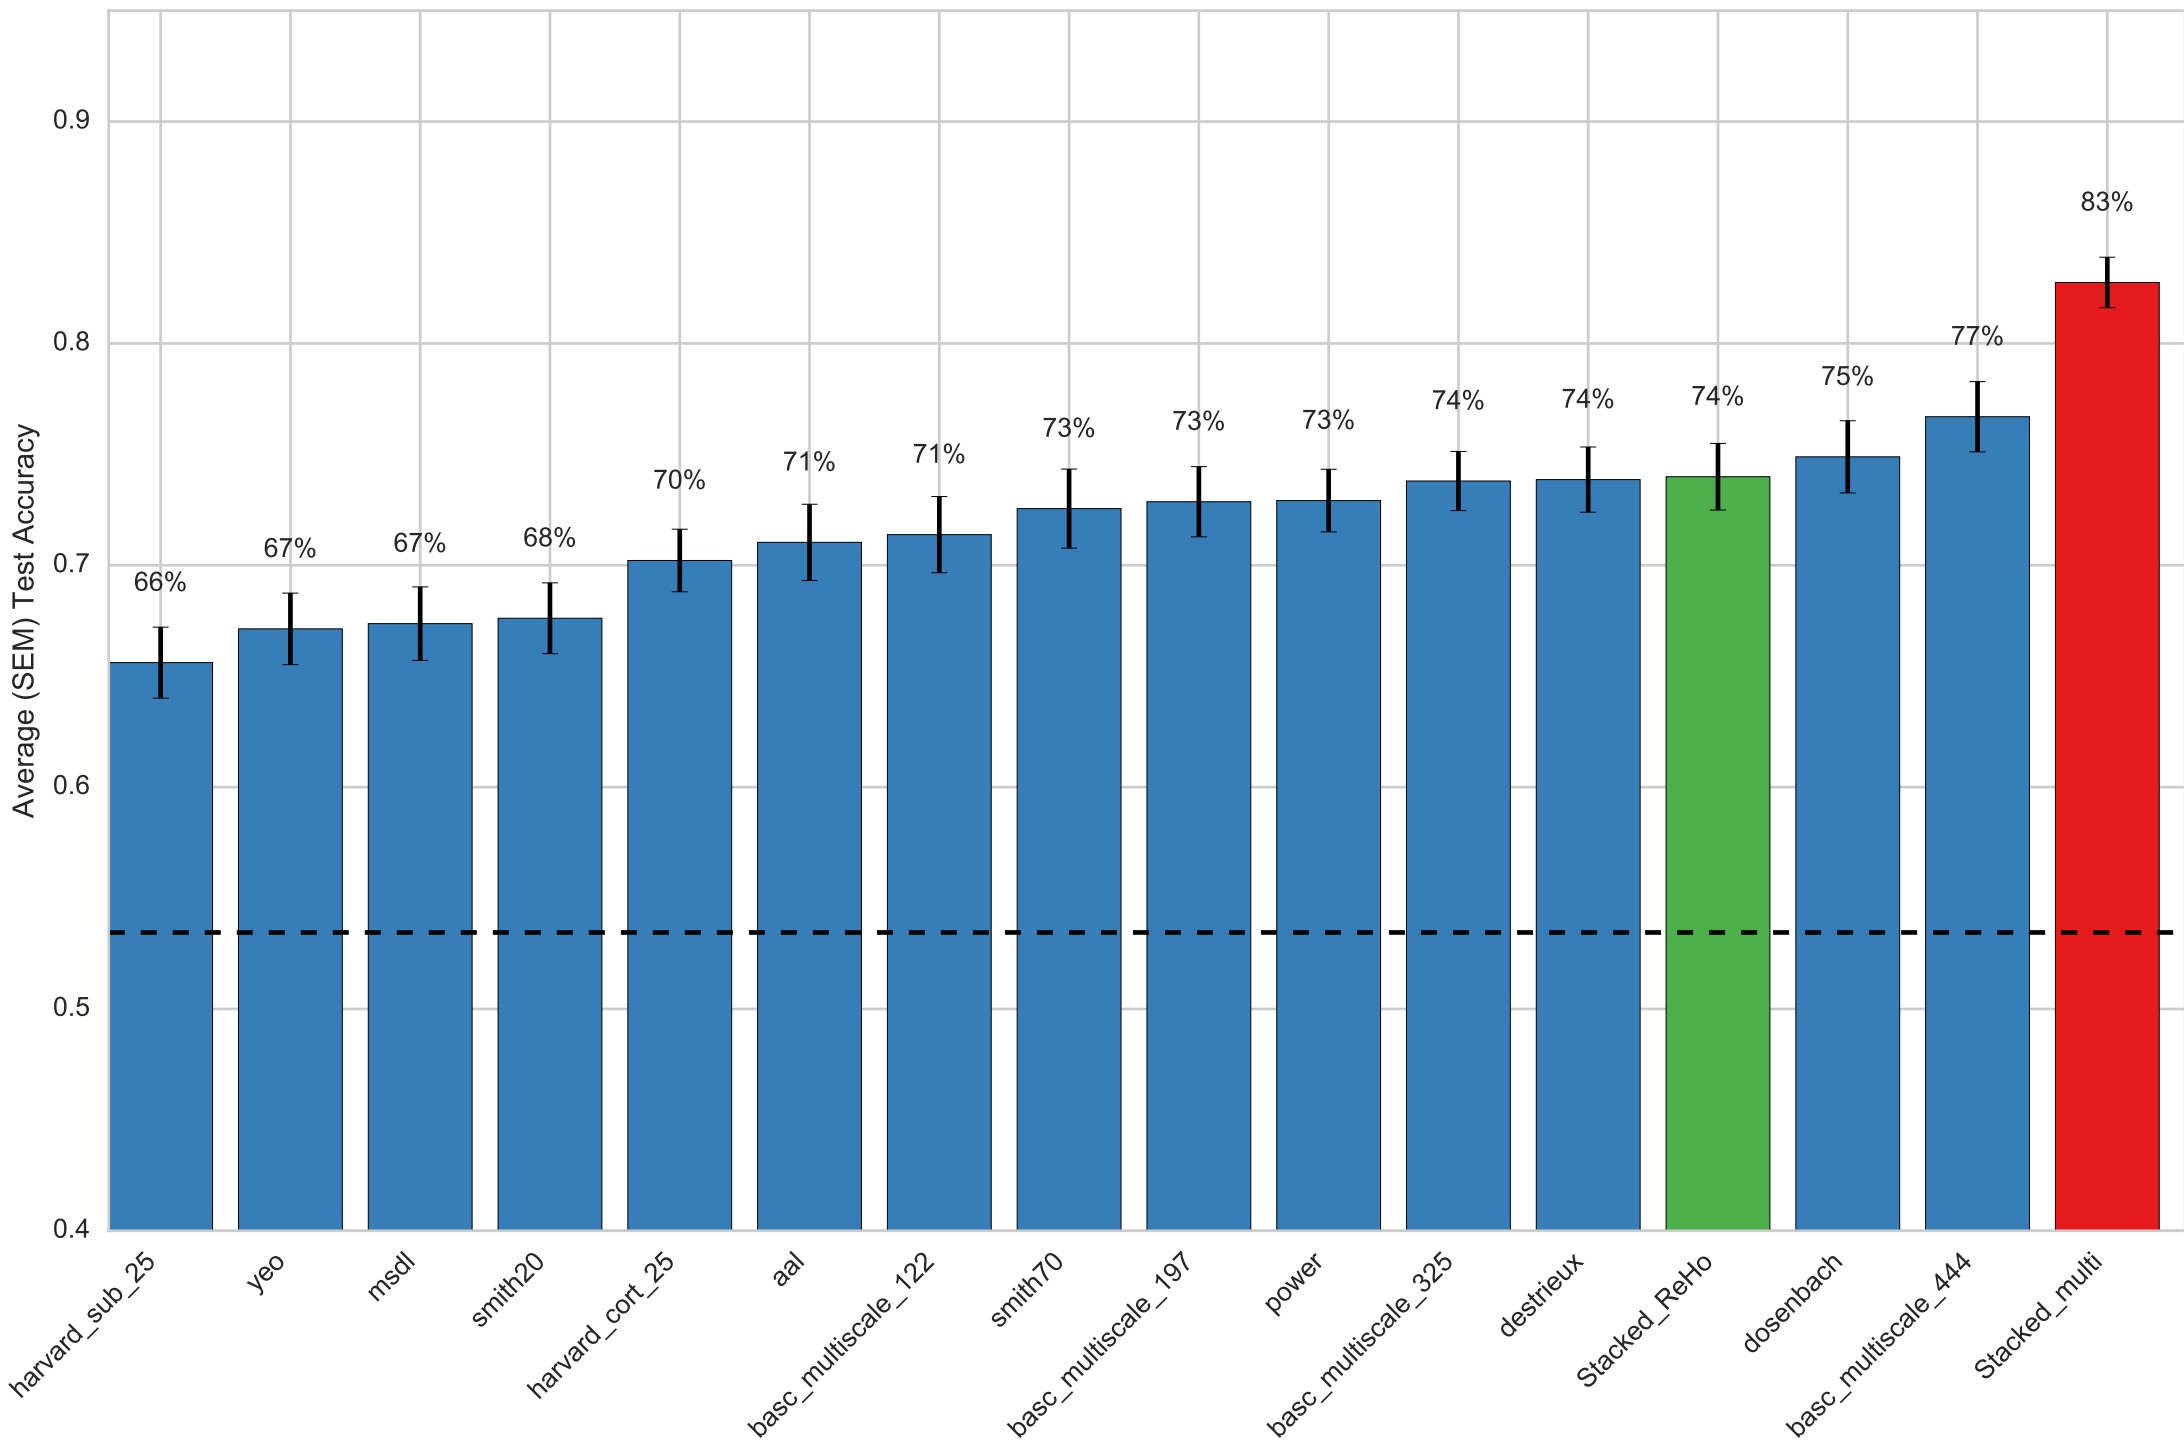

ALFF : Top 30% Feature Selection  
Comparison across 14 parcellations and stacked predictions  
10 fold cross-validation - 5 shuffled iterations

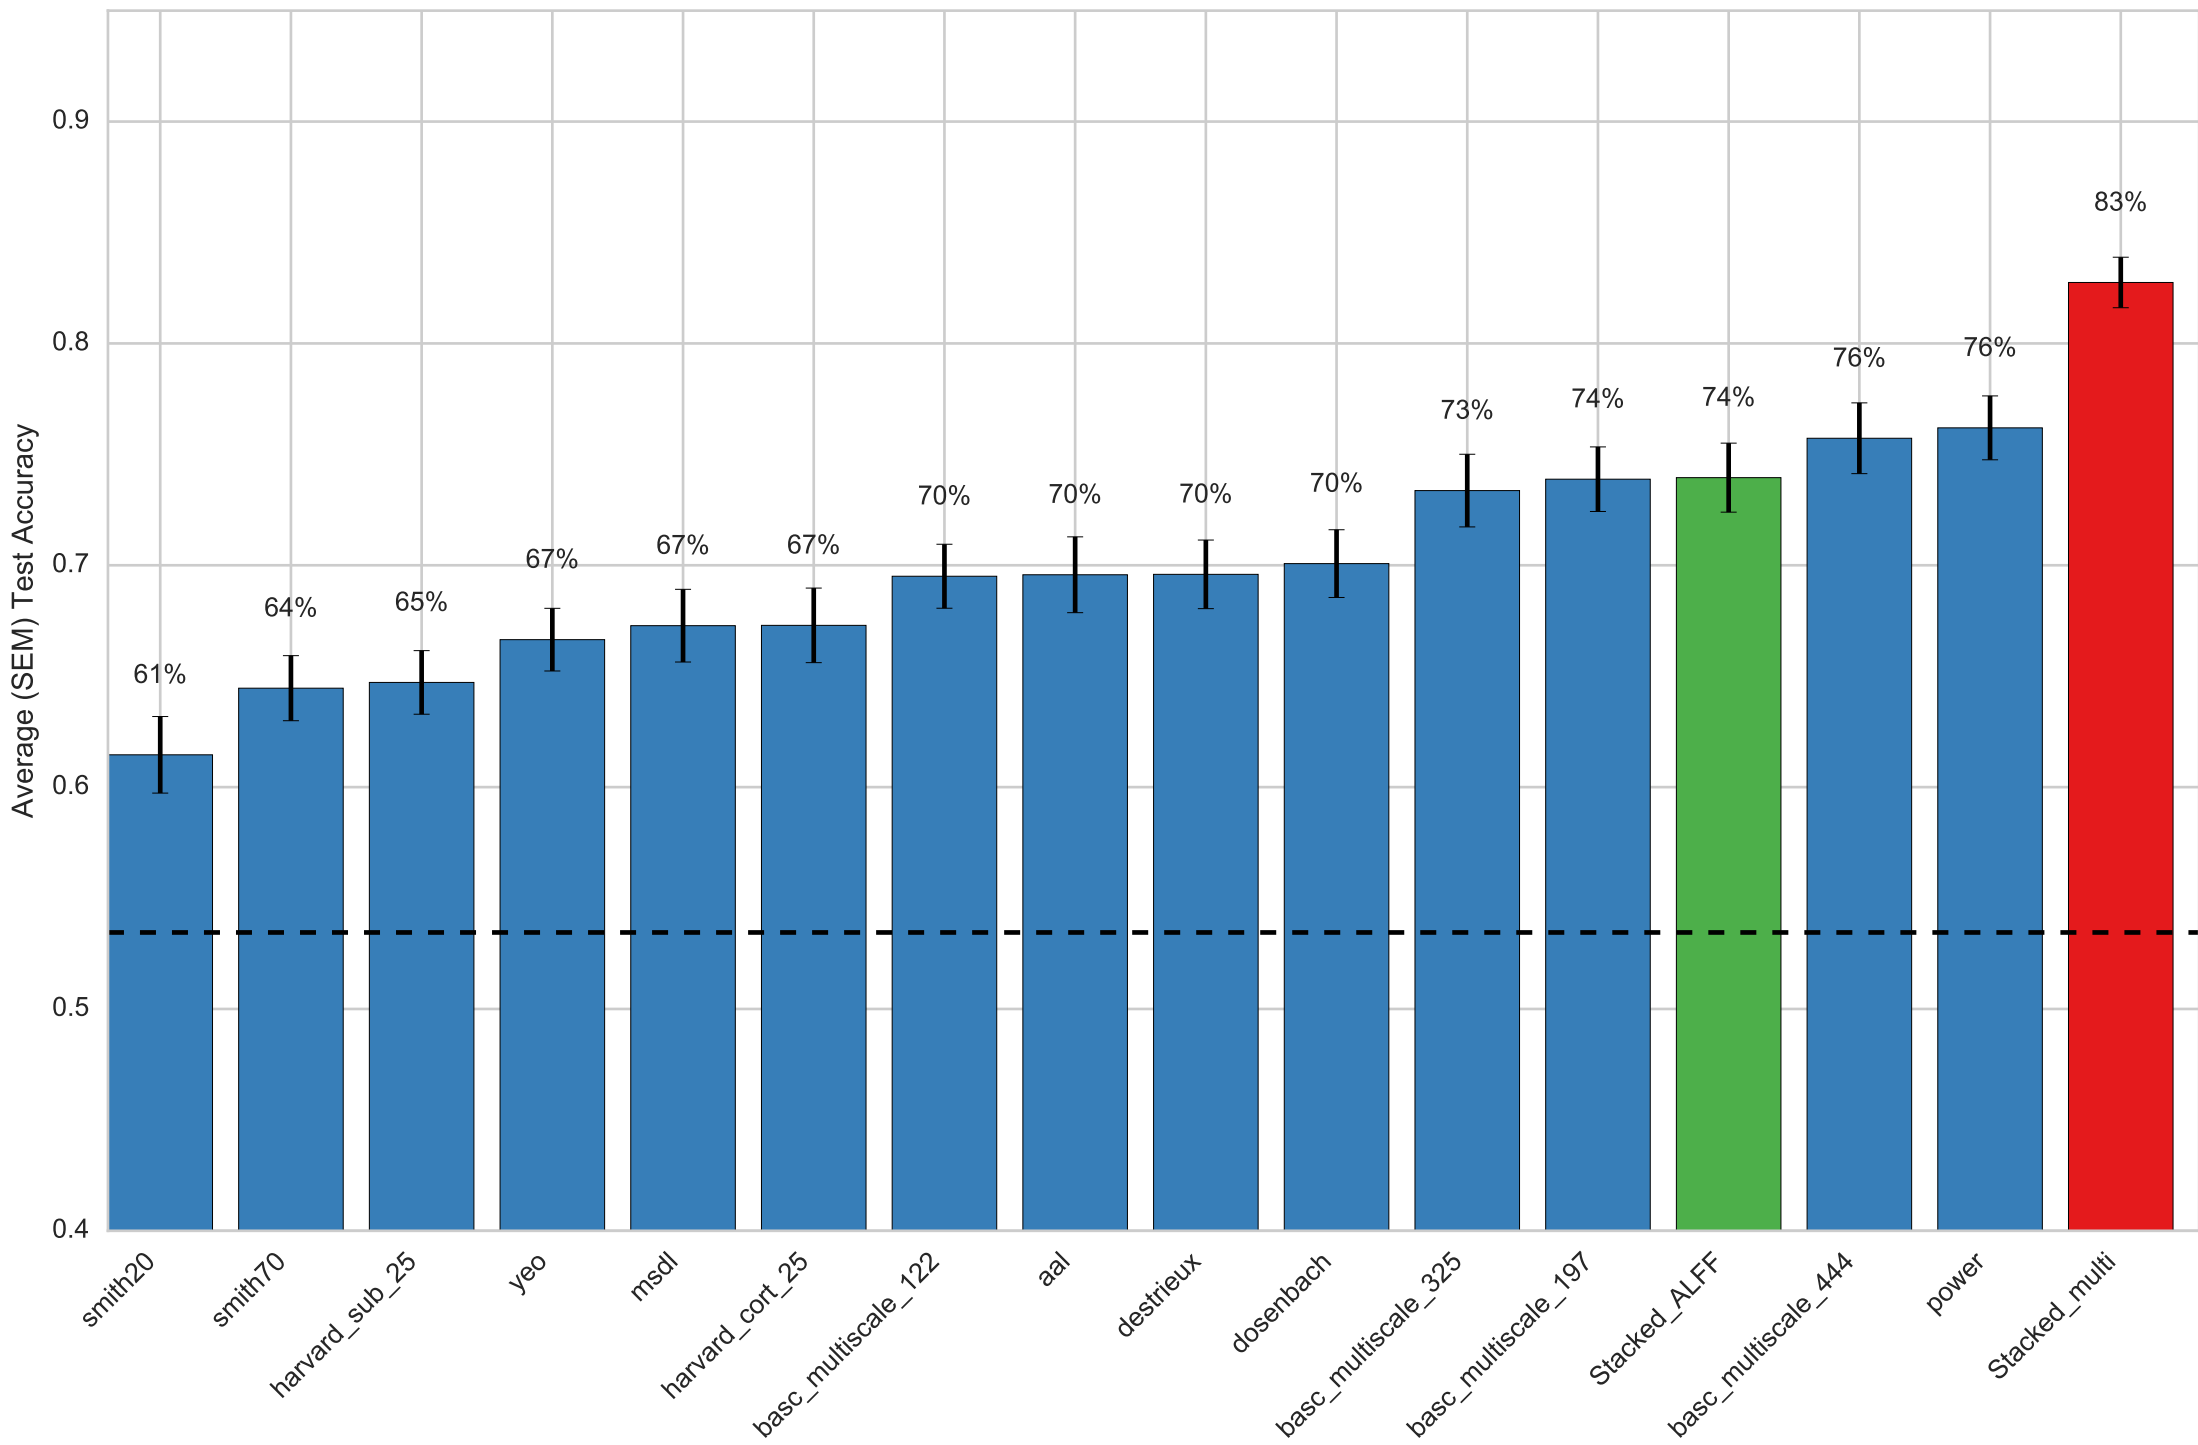



Feature selection / reduction method :Top 1% Feature Selection

fALFF : Top 1% Feature Selection  
Comparison across 14 parcellations and stacked predictions  
10 fold cross-validation - 5 shuffled iterations

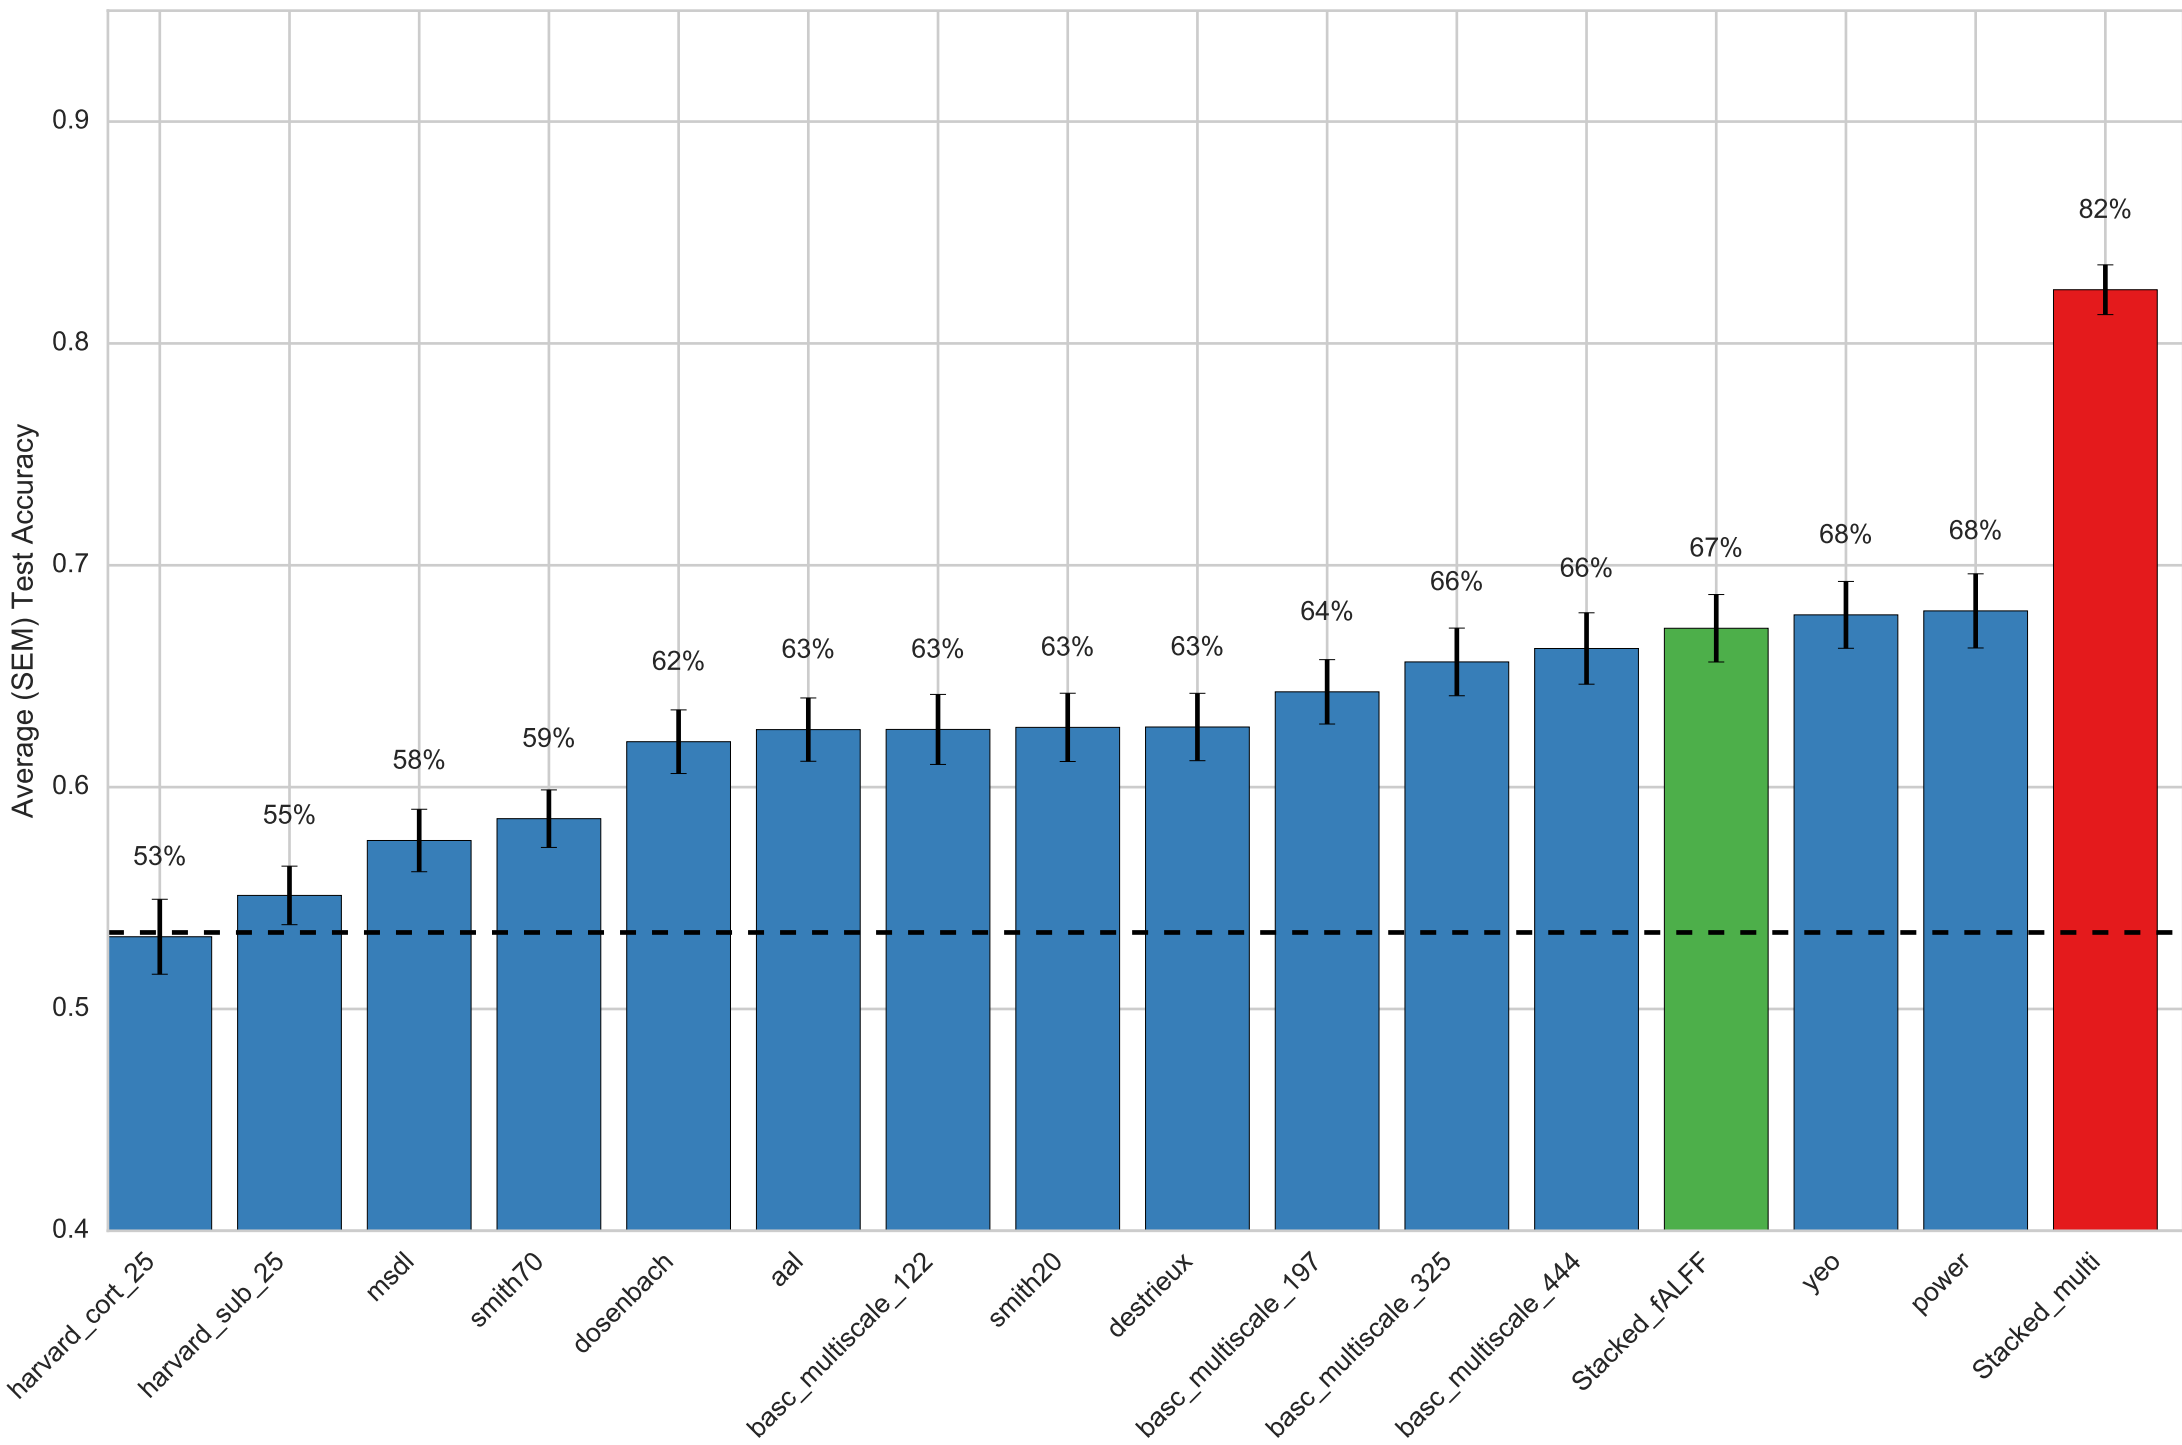

FC\_corr : Top 1% Feature Selection  
Comparison across 14 parcellations and stacked predictions  
10 fold cross-validation - 5 shuffled iterations

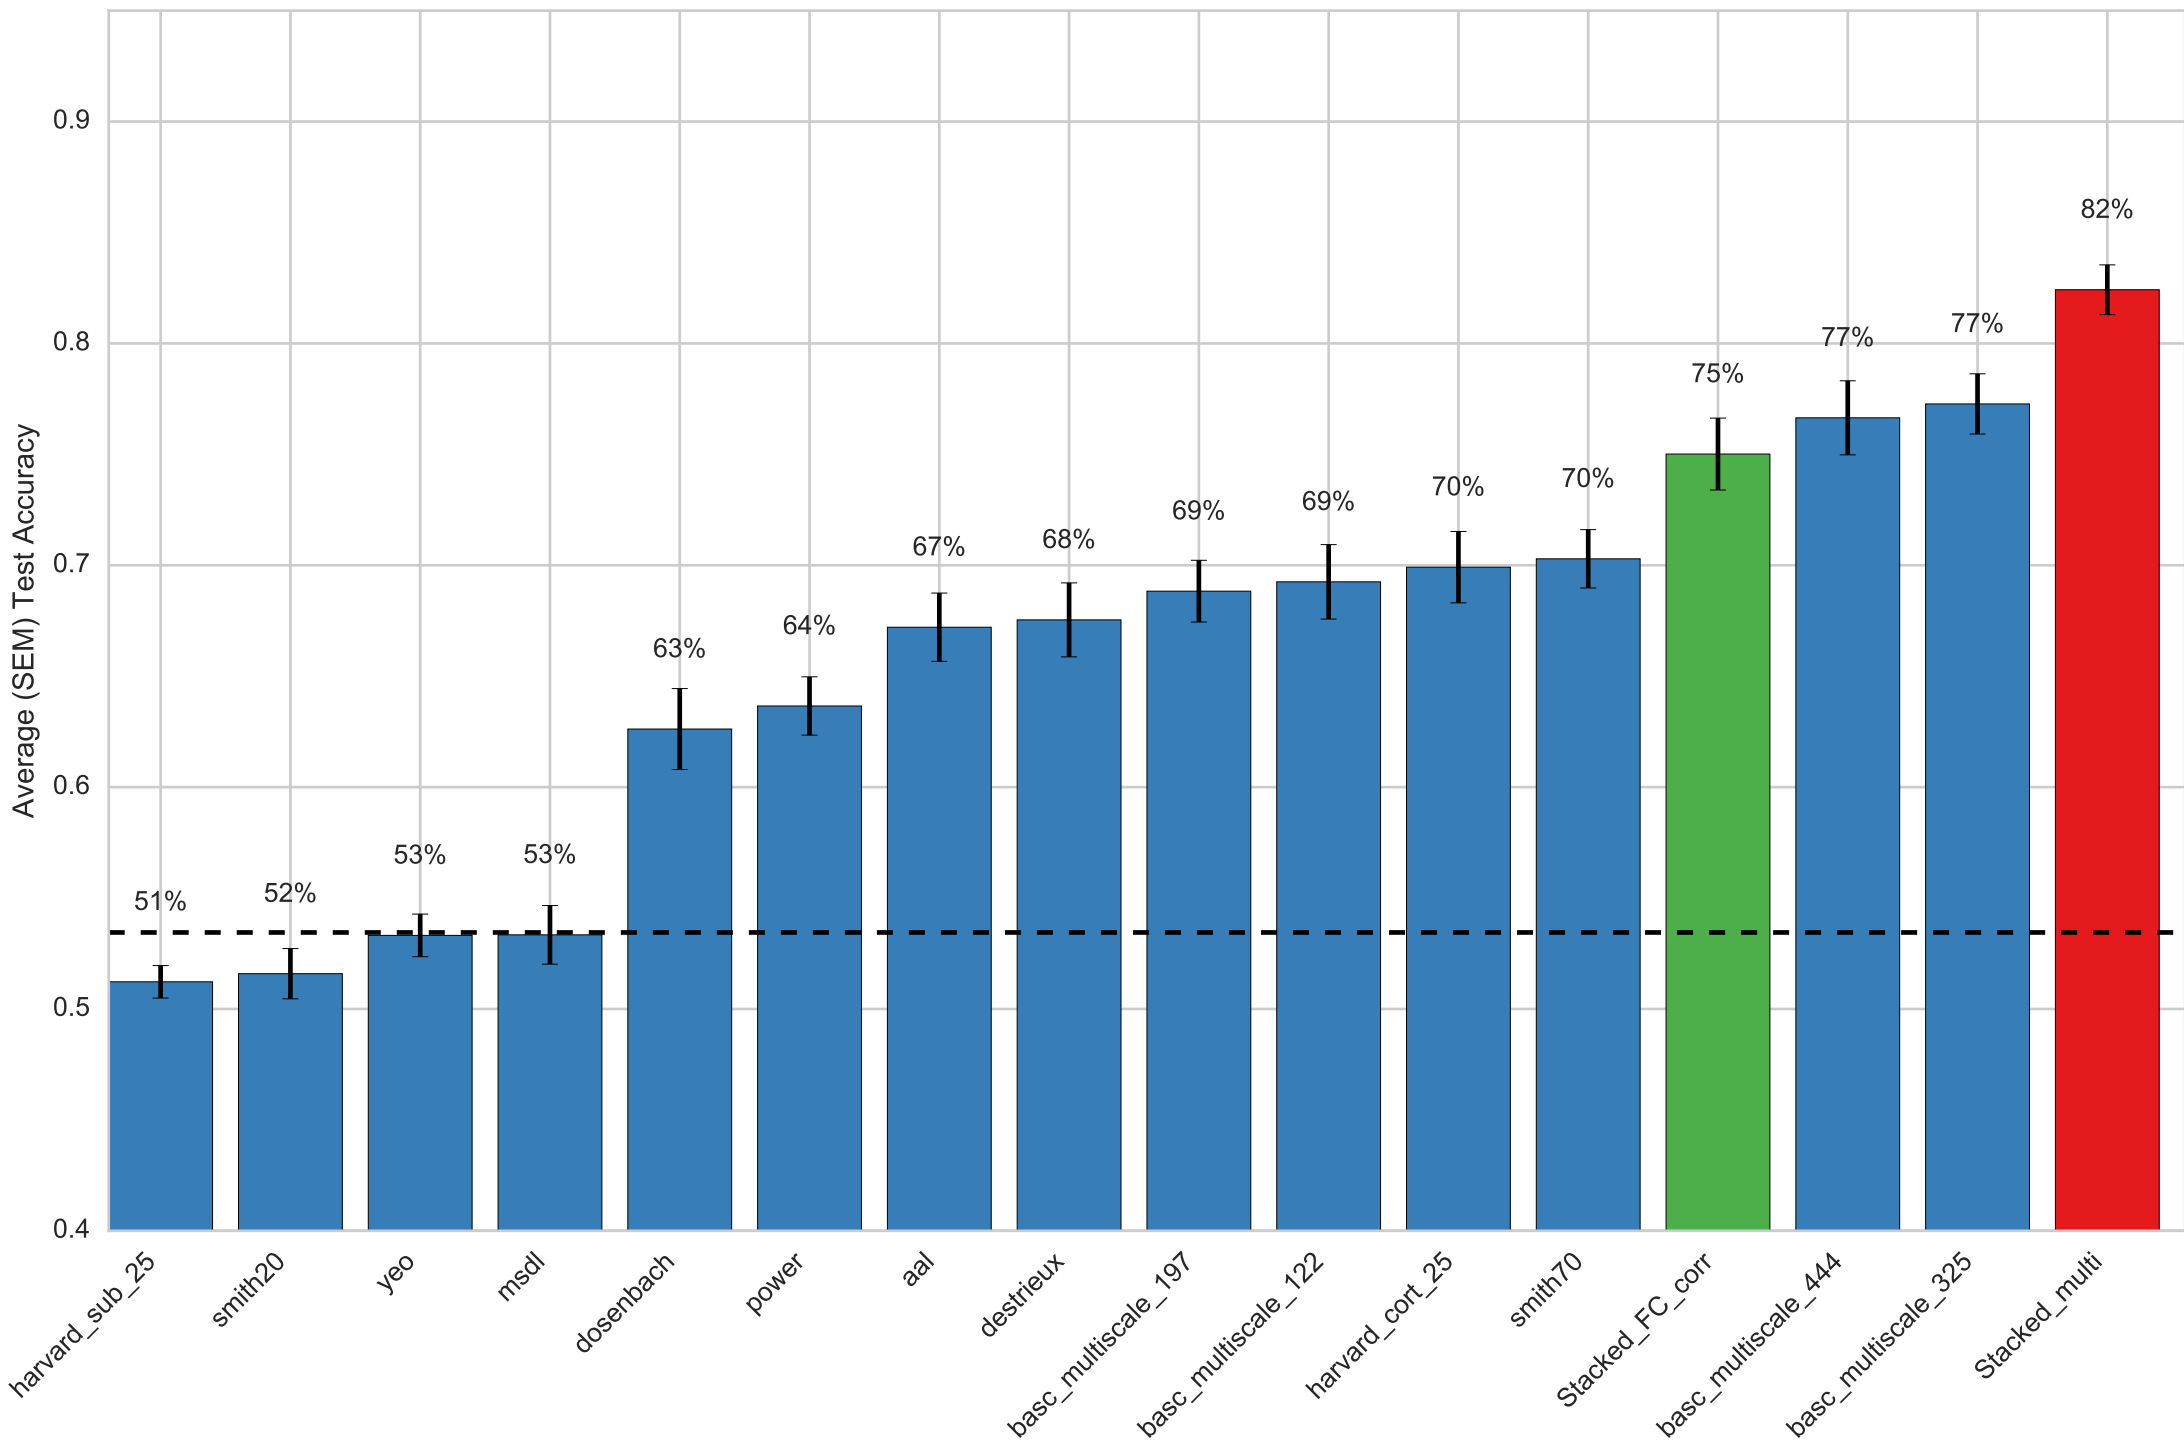

FC\_part : Top 1% Feature Selection  
Comparison across 14 parcellations and stacked predictions  
10 fold cross-validation - 5 shuffled iterations

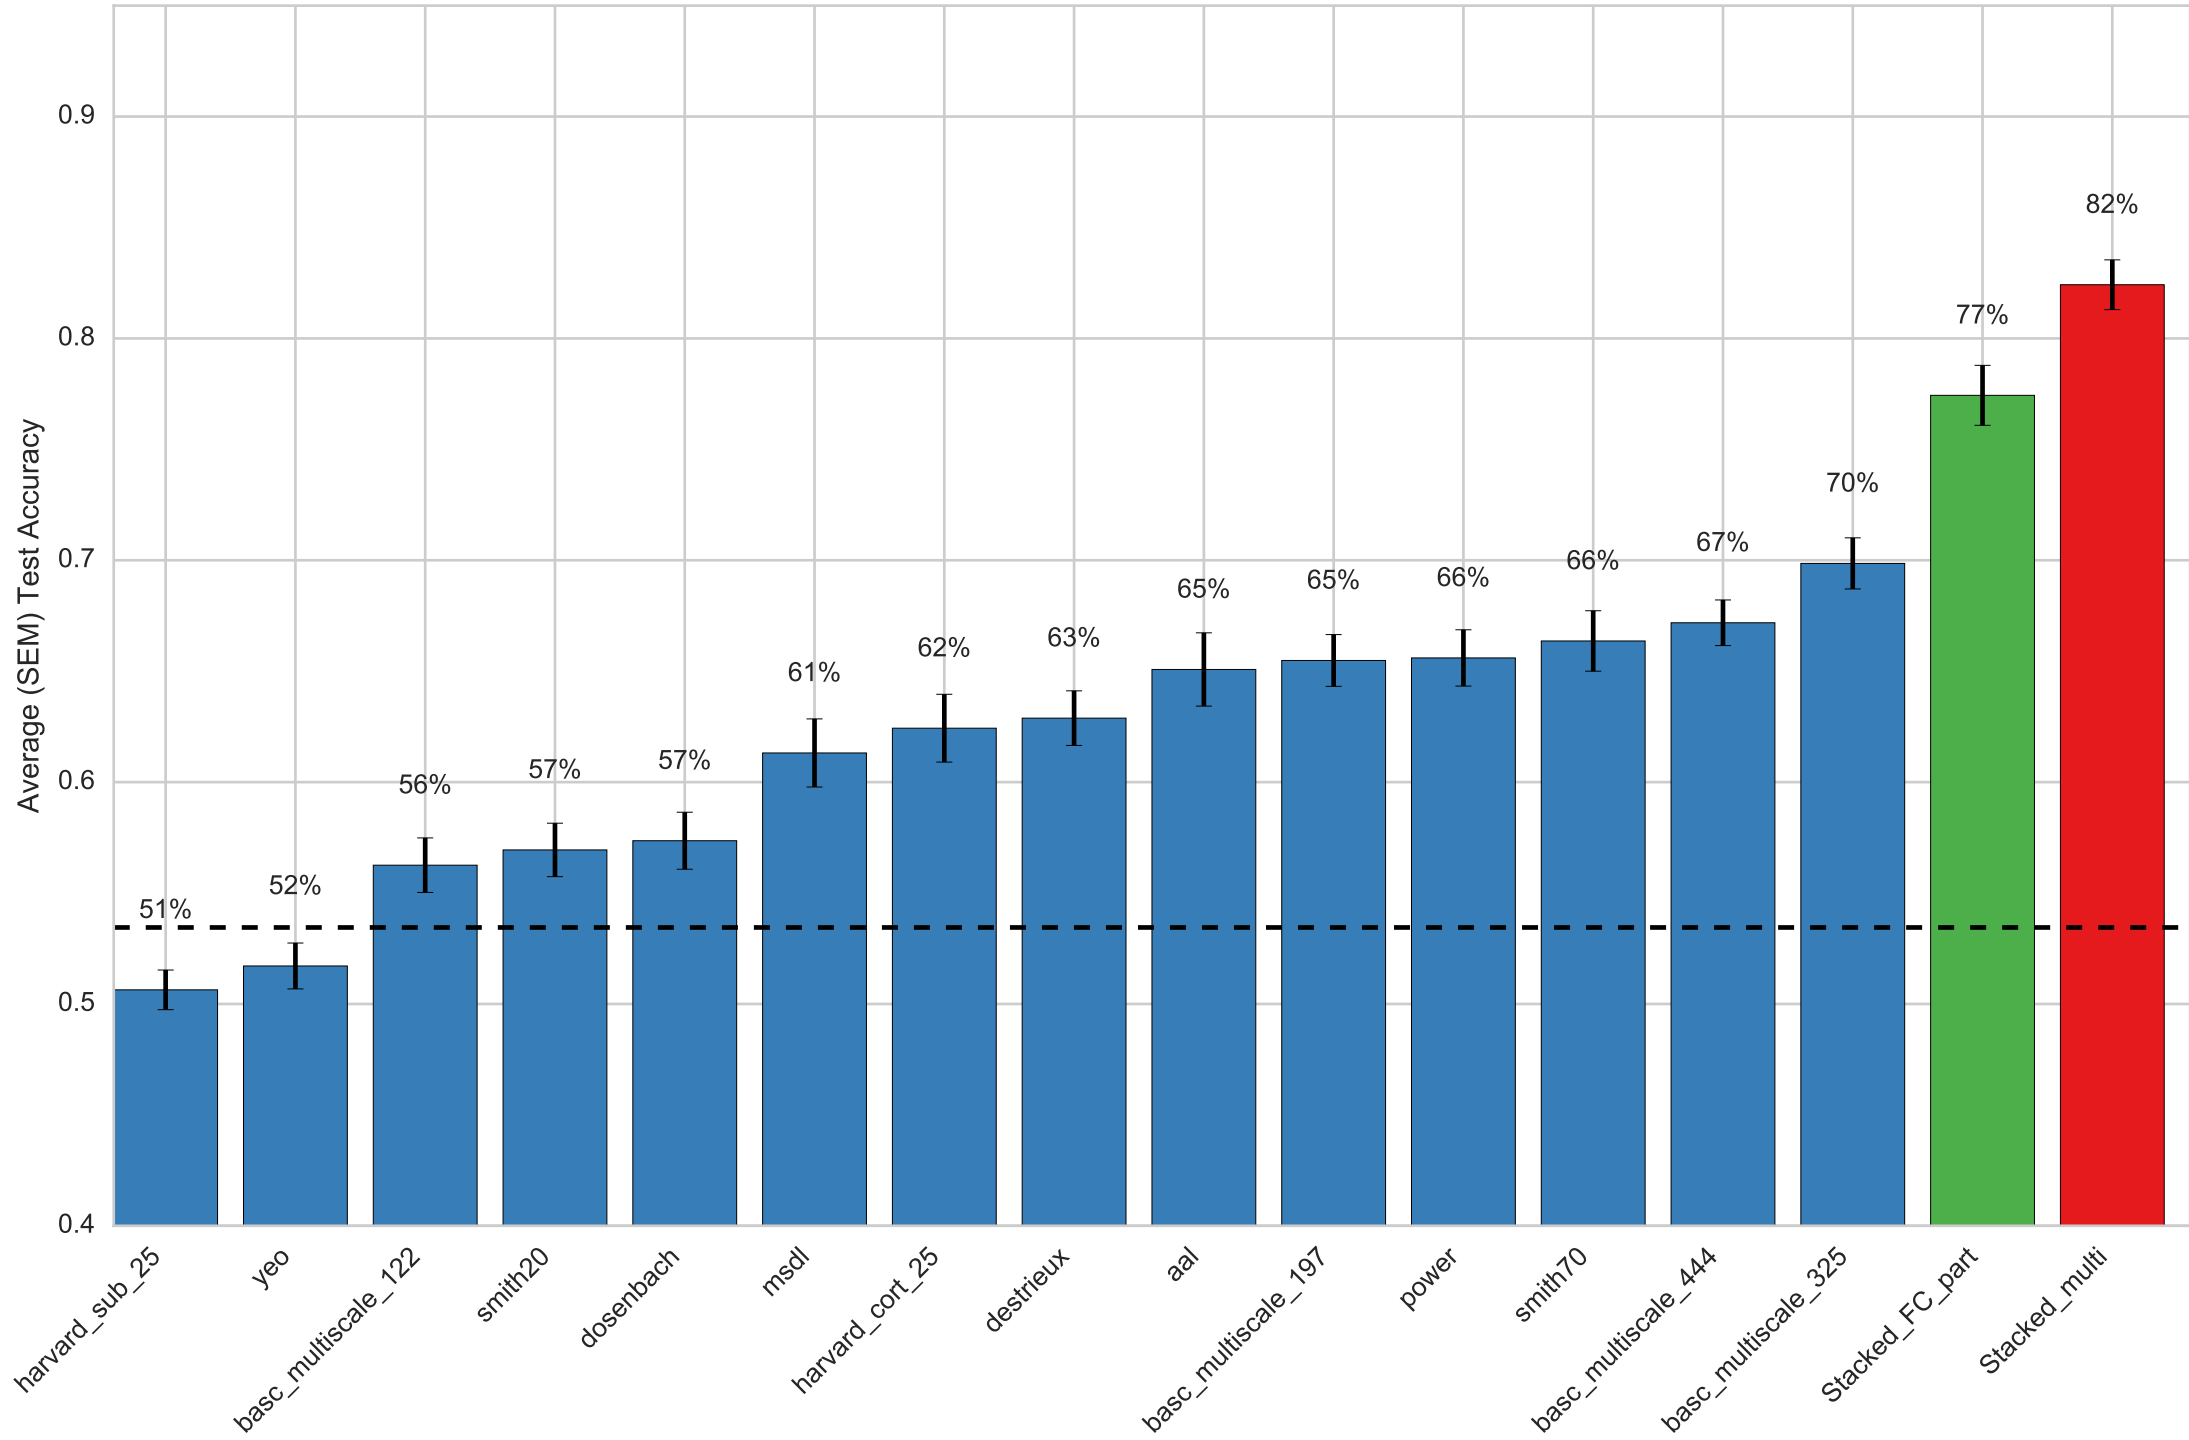

FC\_prec : Top 1% Feature Selection  
Comparison across 14 parcellations and stacked predictions  
10 fold cross-validation - 5 shuffled iterations

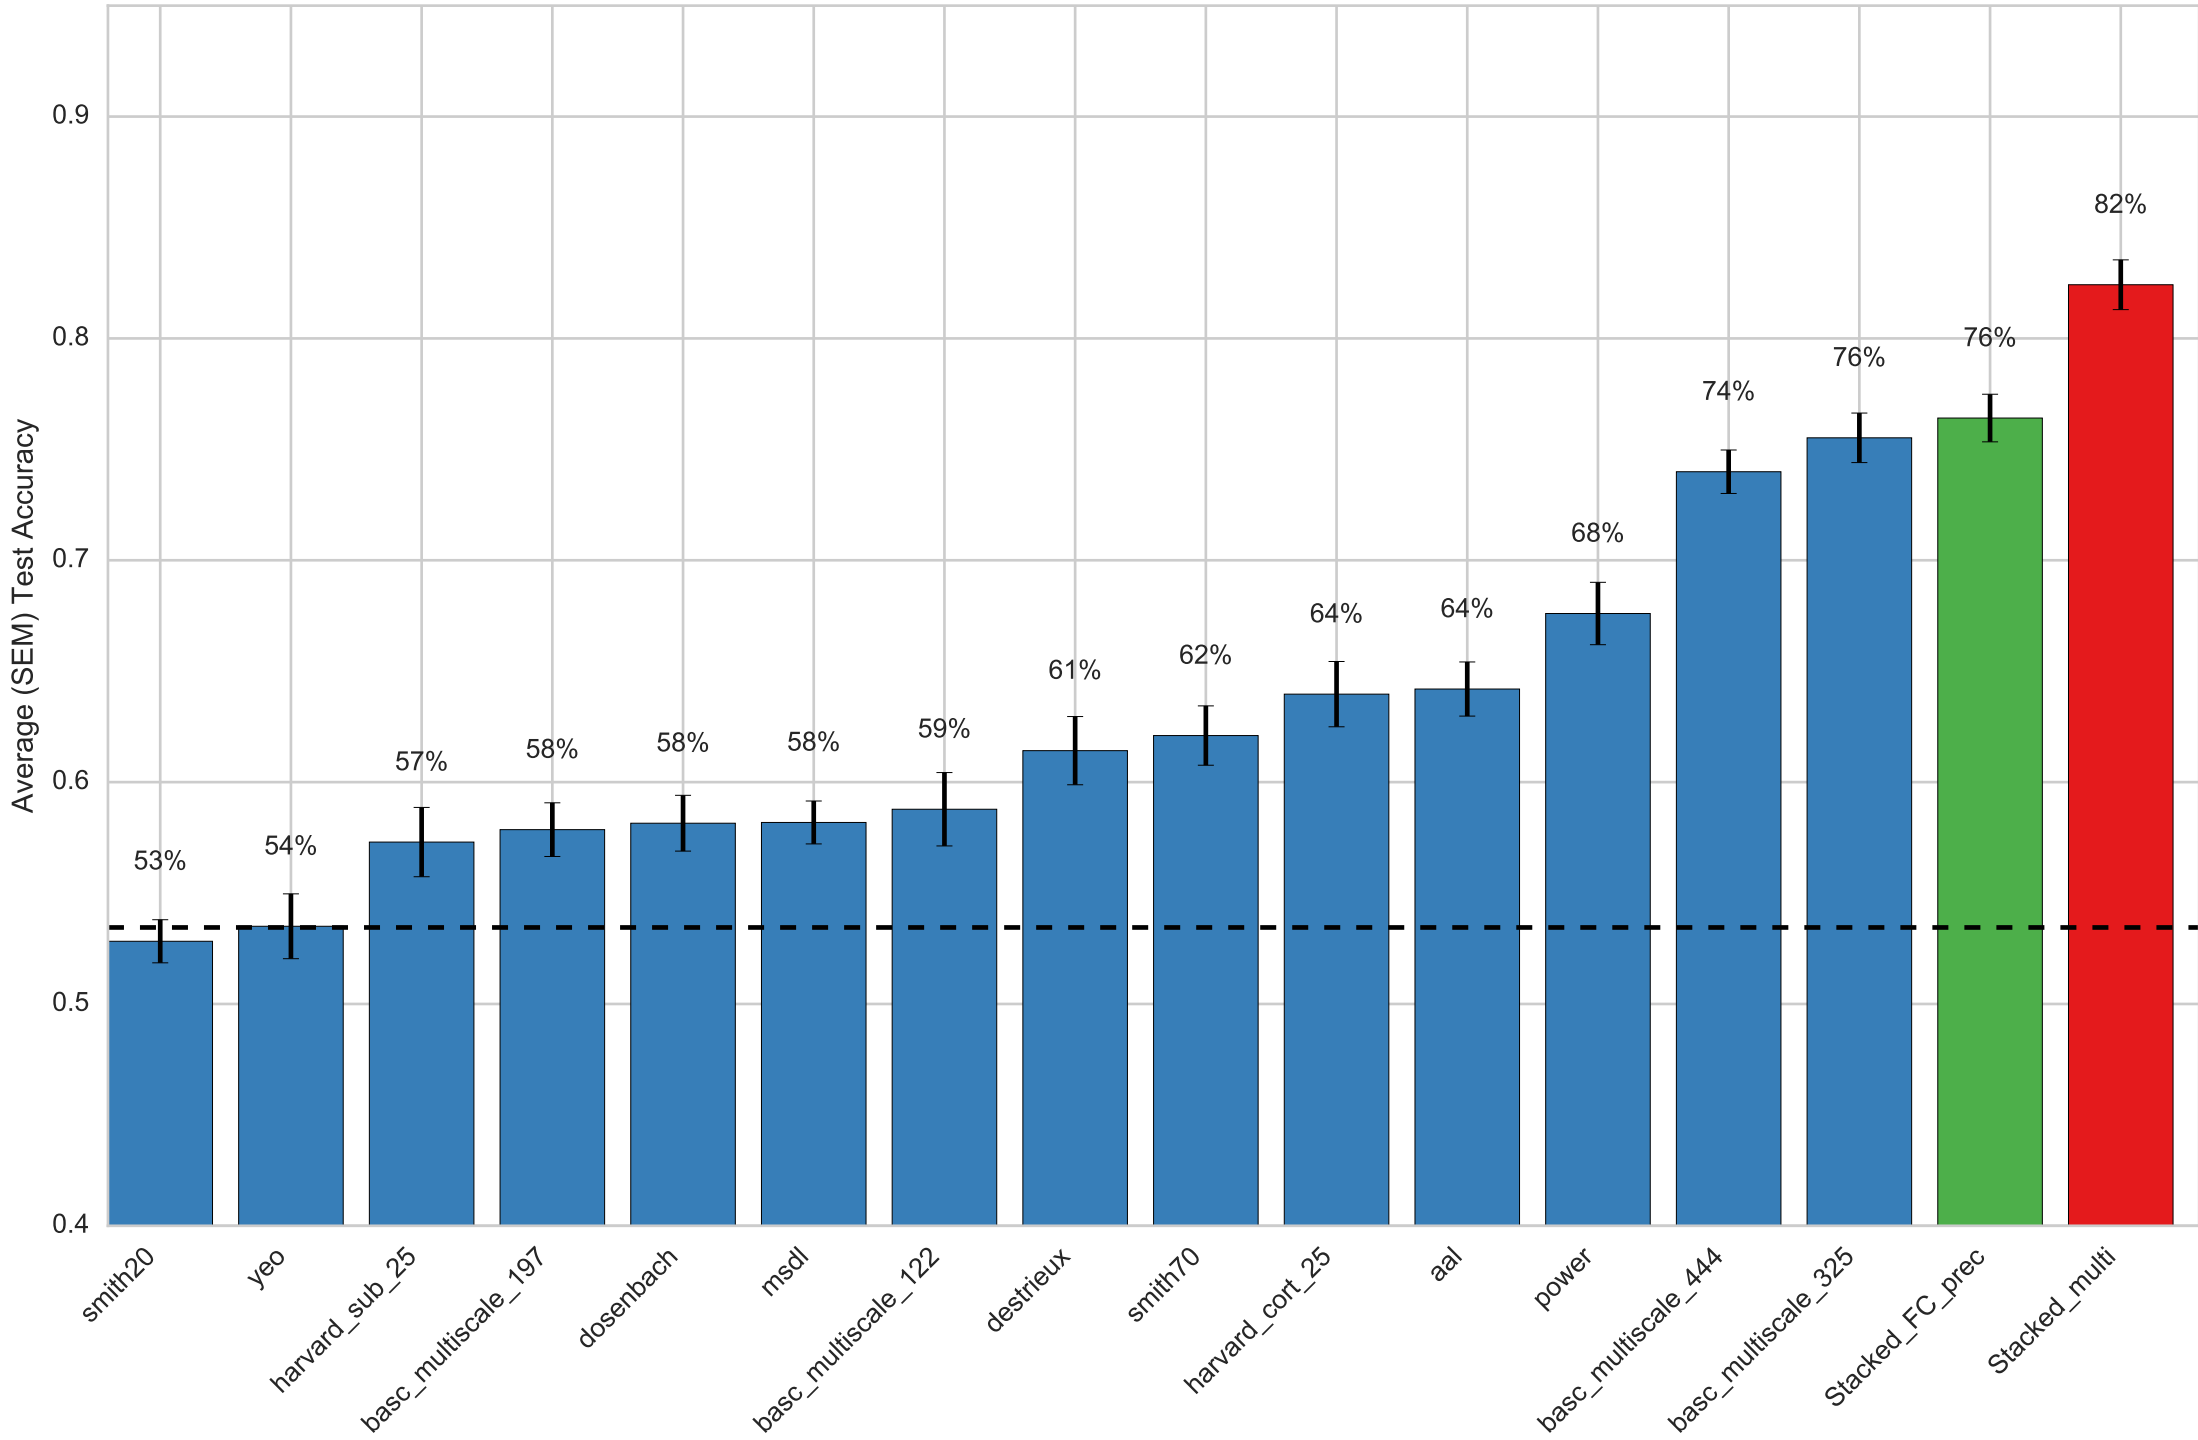

ReHo : Top 1% Feature Selection  
Comparison across 14 parcellations and stacked predictions  
10 fold cross-validation - 5 shuffled iterations

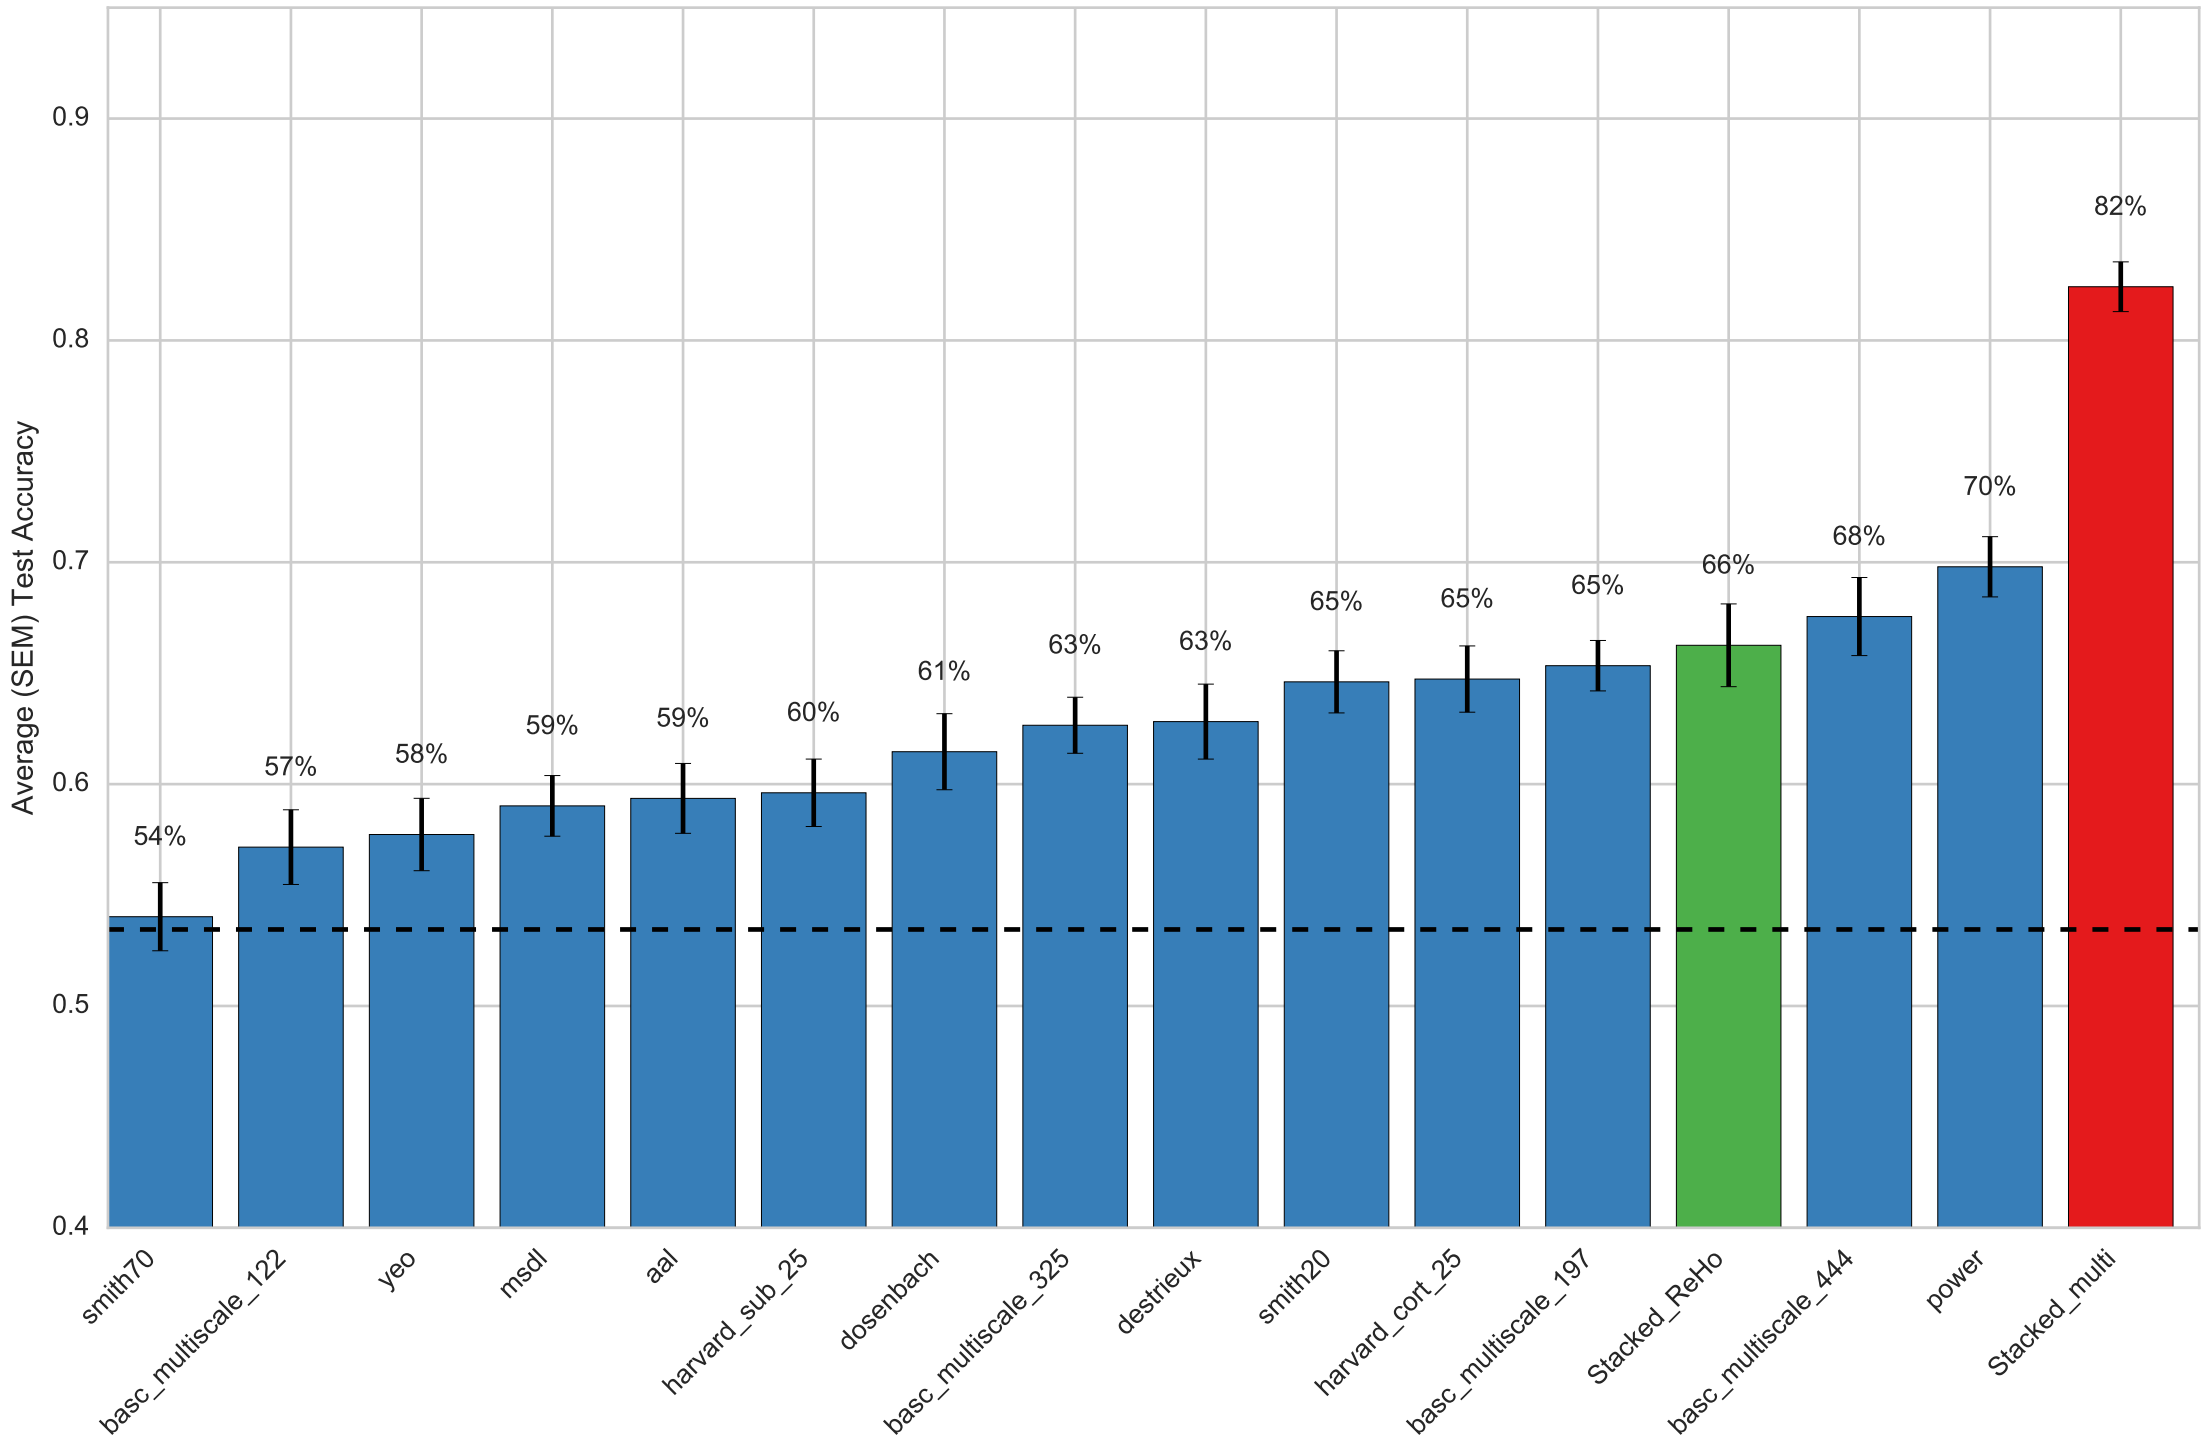

ALFF : Top 1% Feature Selection  
Comparison across 14 parcellations and stacked predictions  
10 fold cross-validation - 5 shuffled iterations

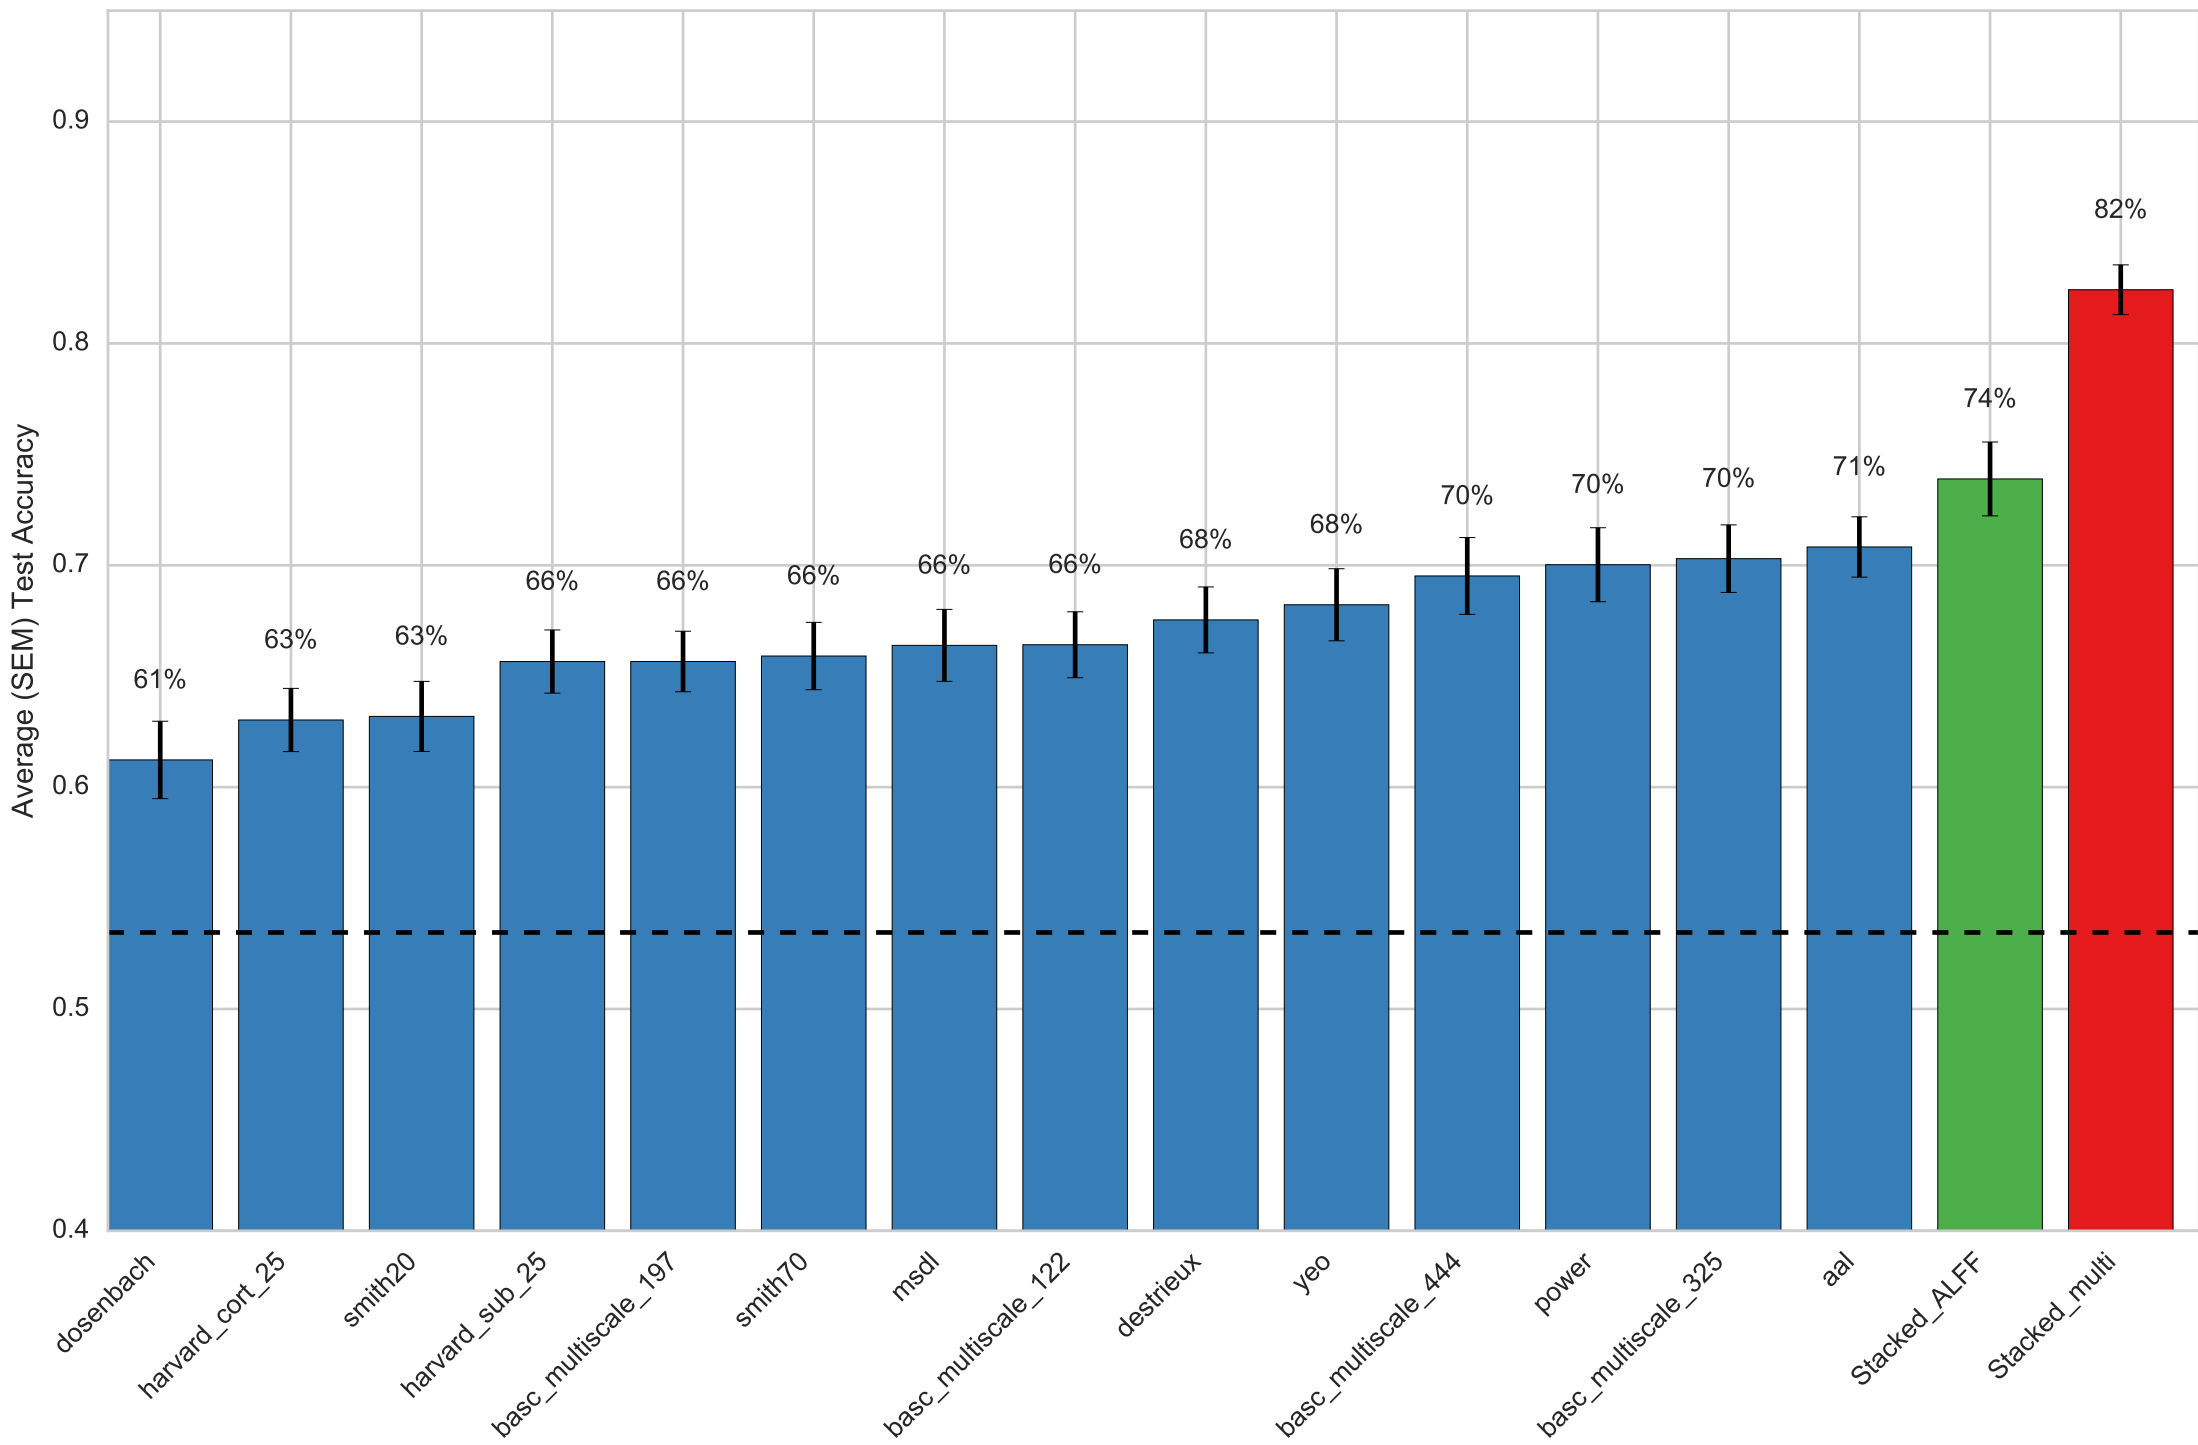

Feature selection / reduction method :Top 30% FC, 100% regional Feature Selection



fALFF : Top 30% FC, 100% regional Feature Selection  
Comparison across 14 parcellations and stacked predictions  
10 fold cross-validation - 5 shuffled iterations

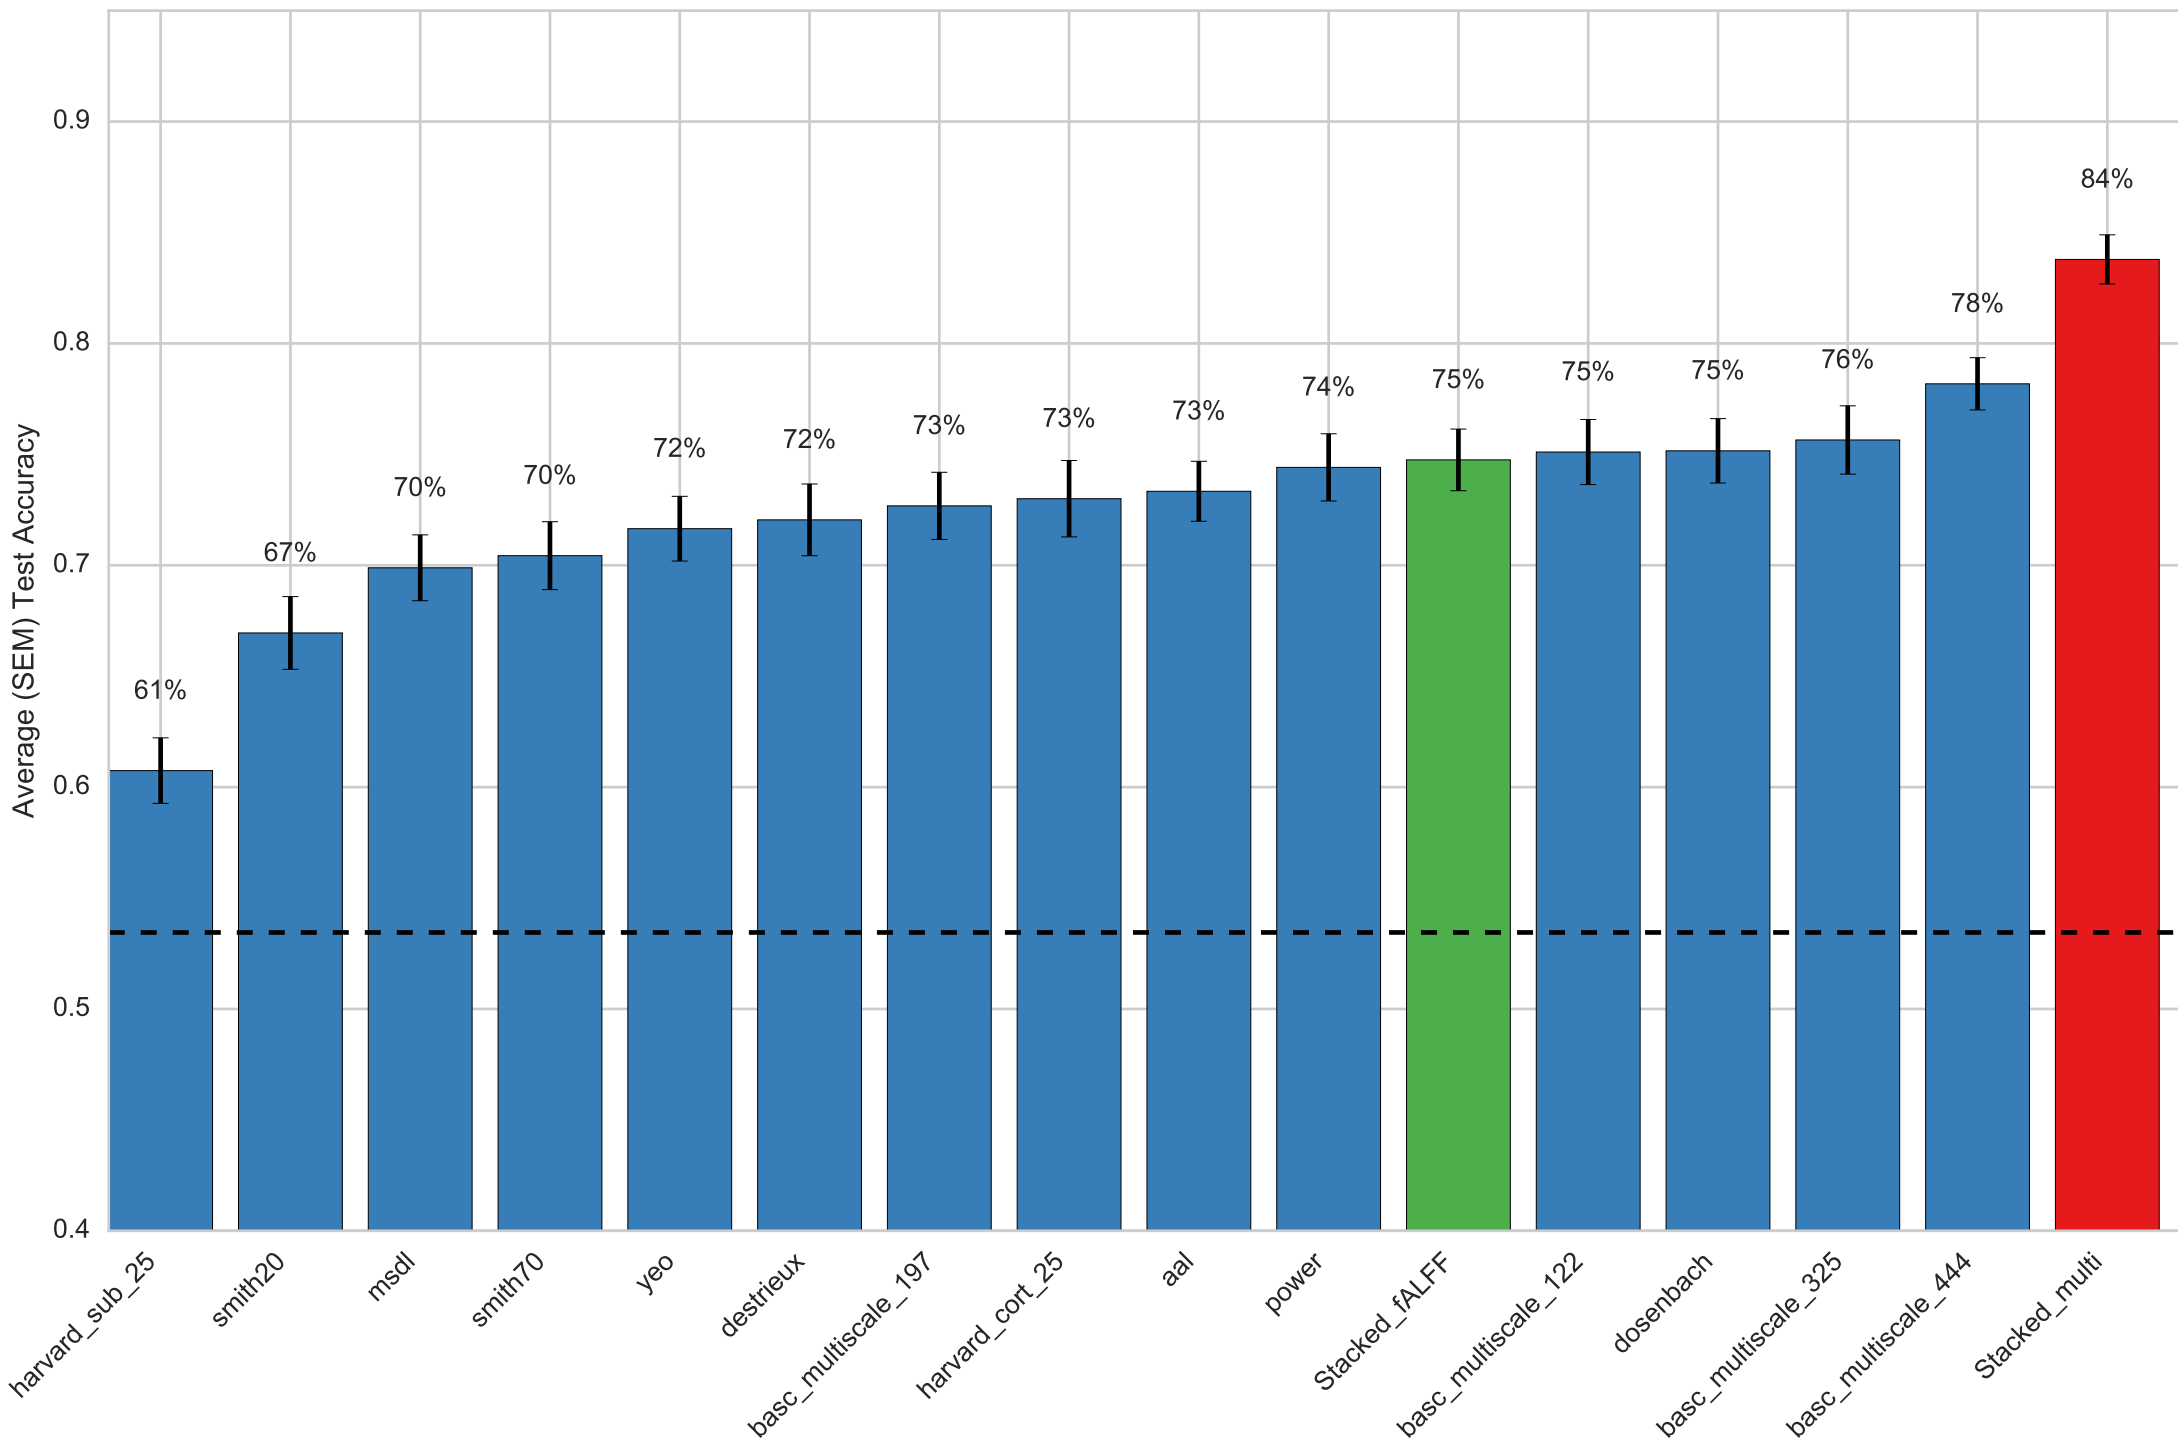

FC\_corr : Top 30% FC, 100% regional Feature Selection  
Comparison across 14 parcellations and stacked predictions  
10 fold cross-validation - 5 shuffled iterations

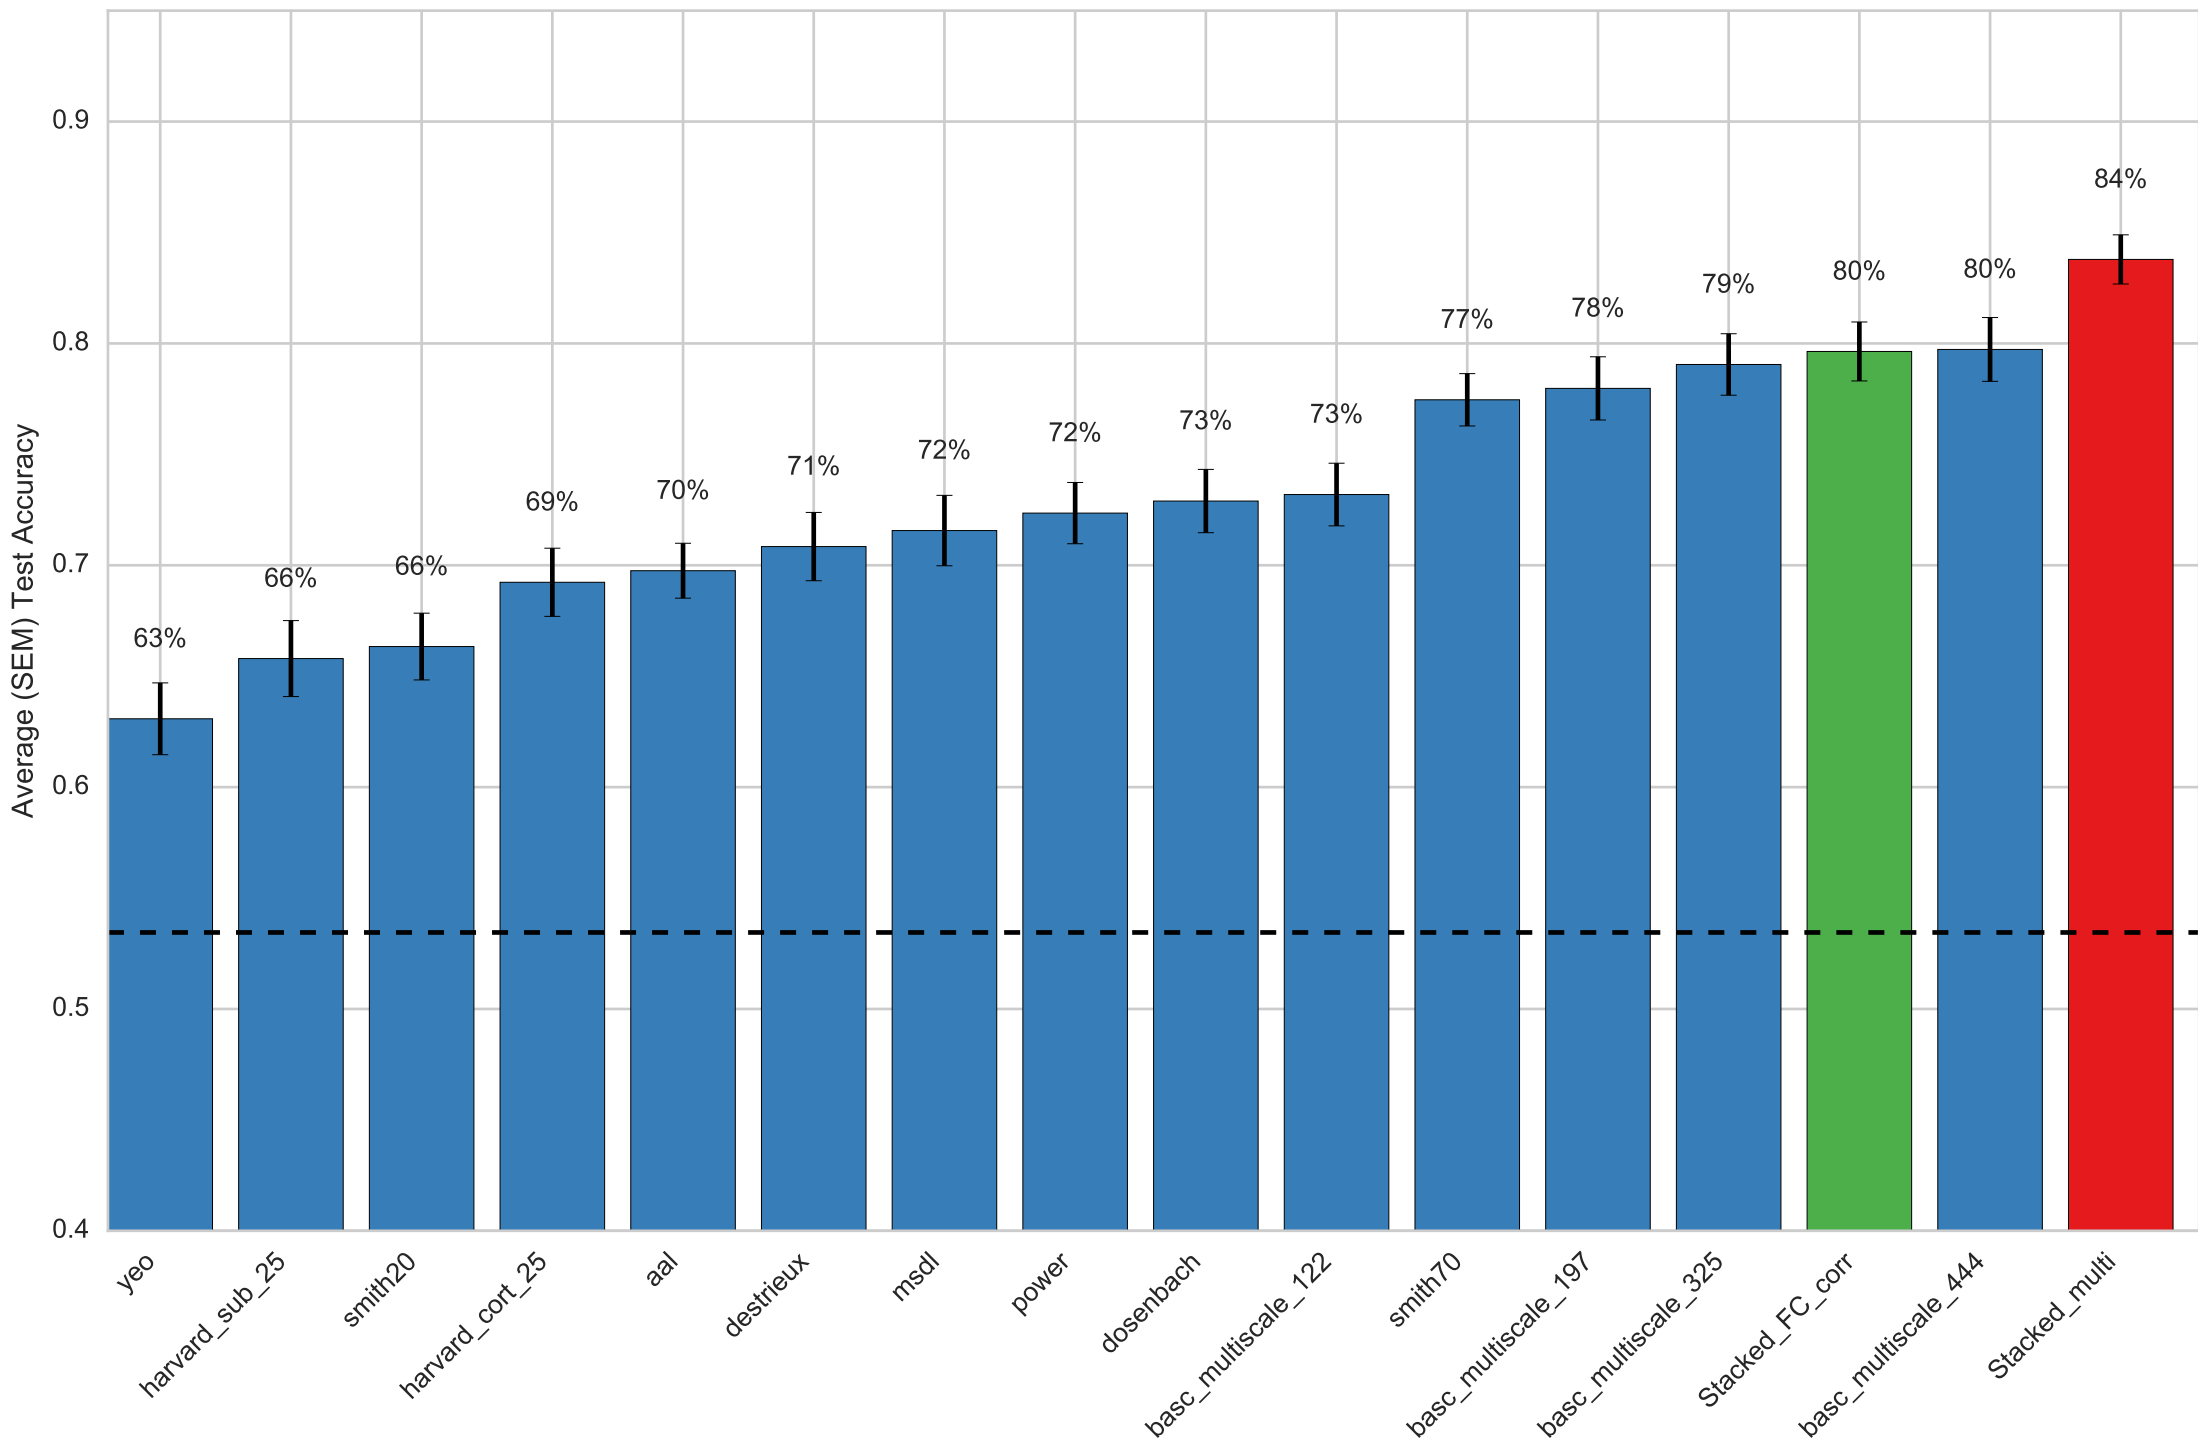

FC\_part : Top 30% FC, 100% regional Feature Selection  
Comparison across 14 parcellations and stacked predictions  
10 fold cross-validation - 5 shuffled iterations

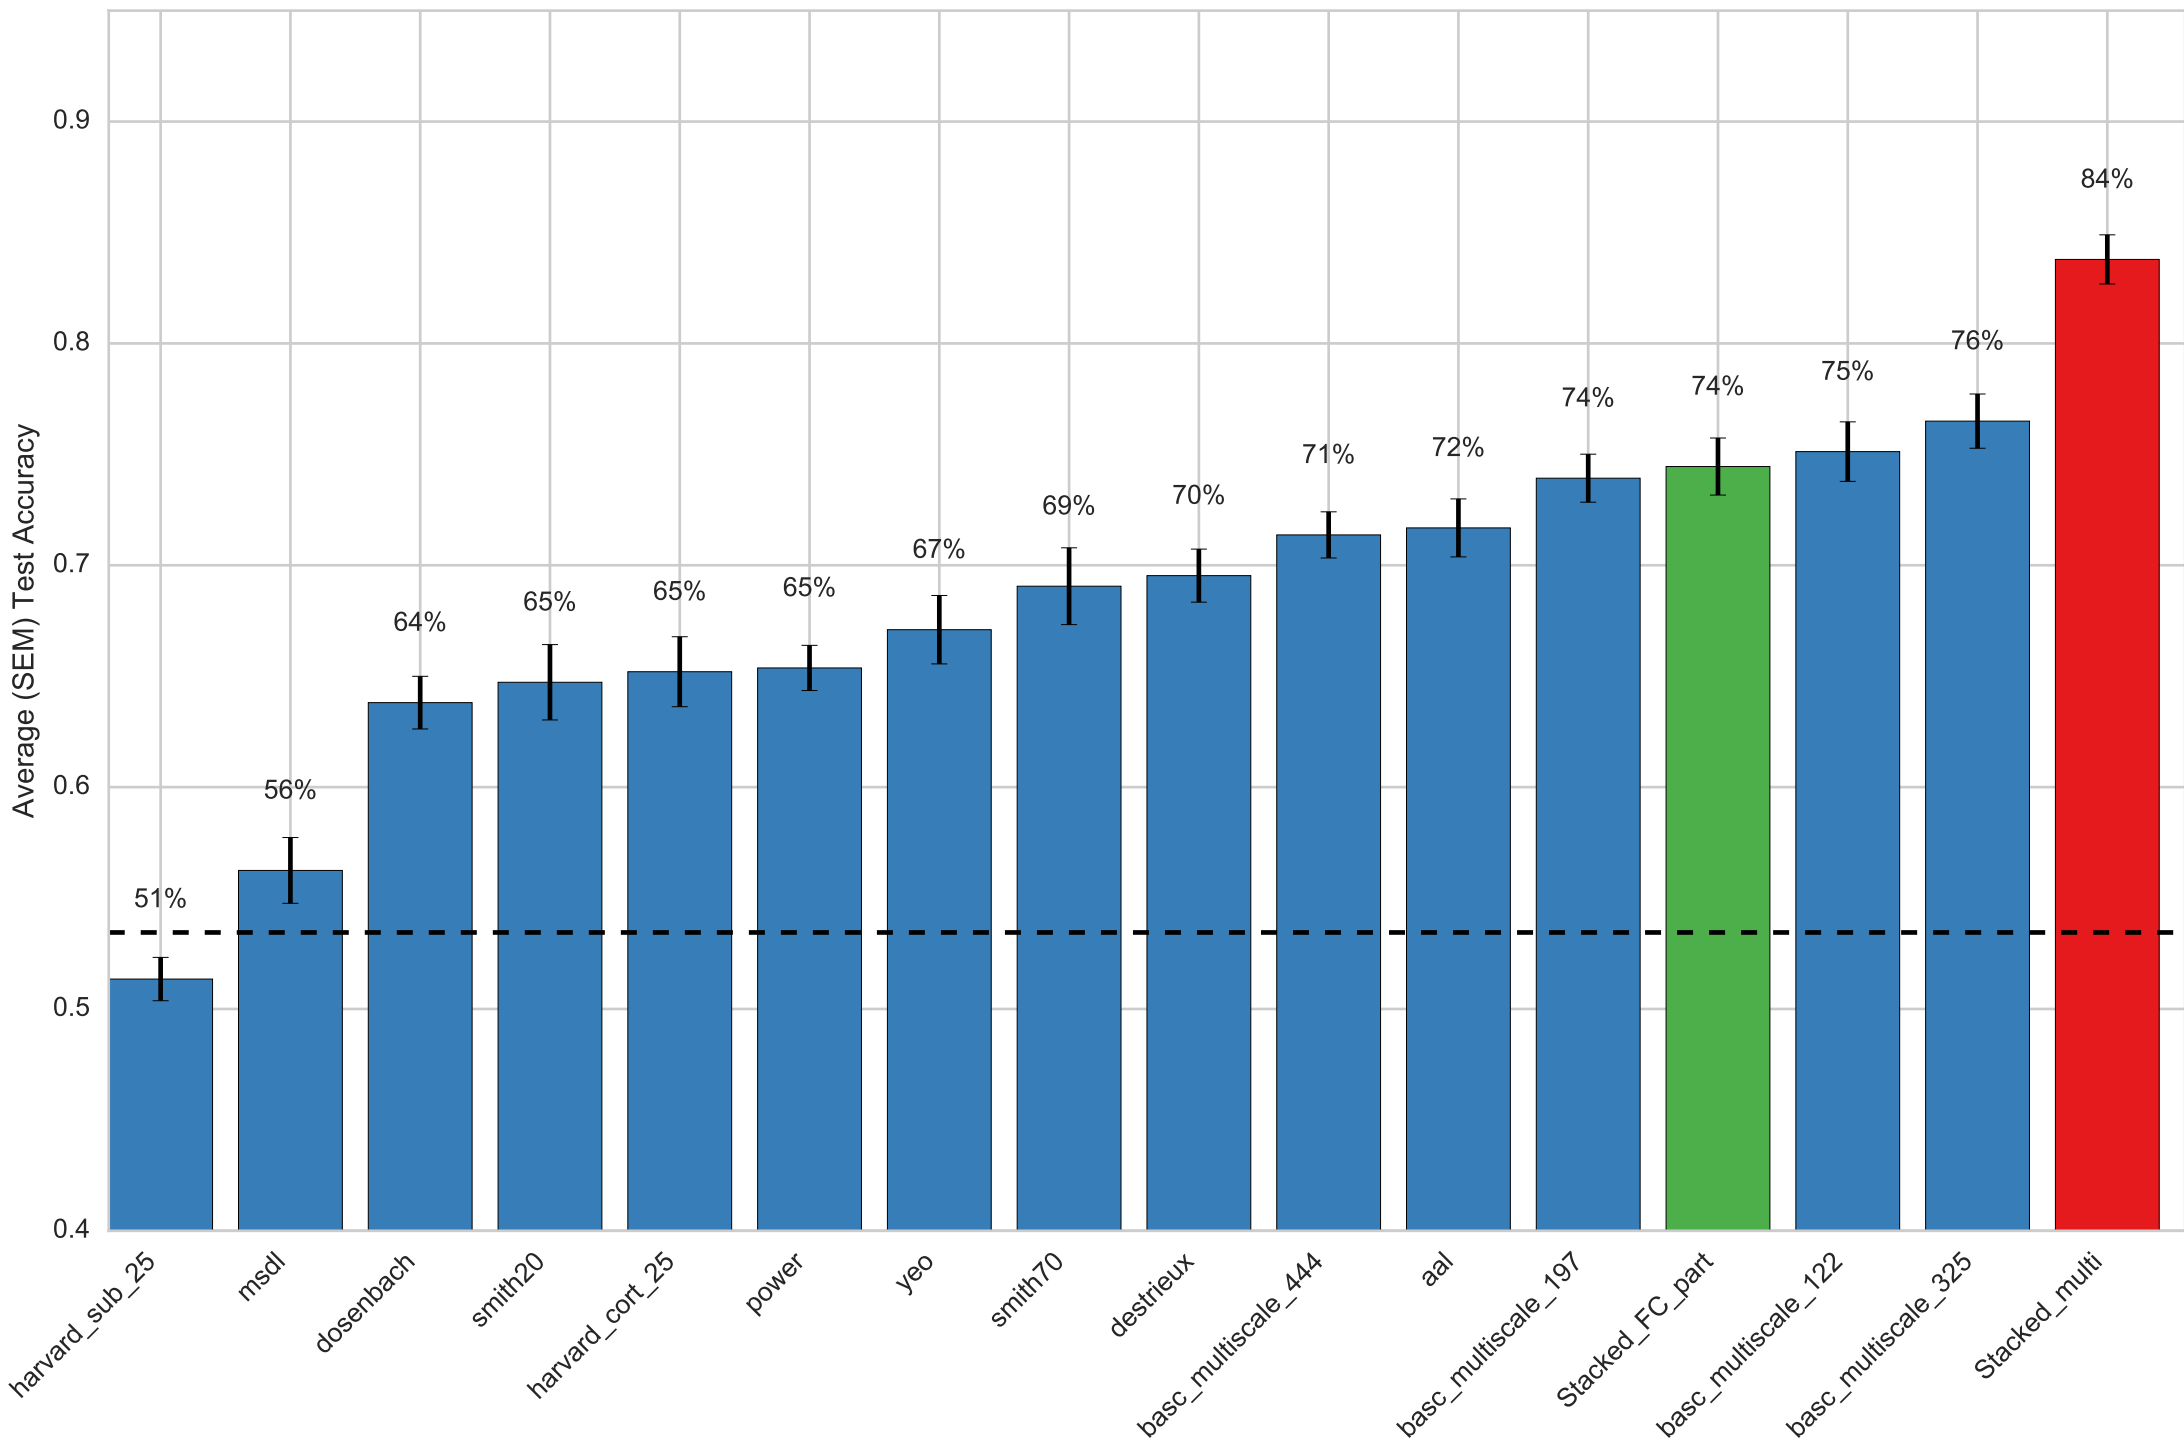

FC\_prec : Top 30% FC, 100% regional Feature Selection  
Comparison across 14 parcellations and stacked predictions  
10 fold cross-validation - 5 shuffled iterations

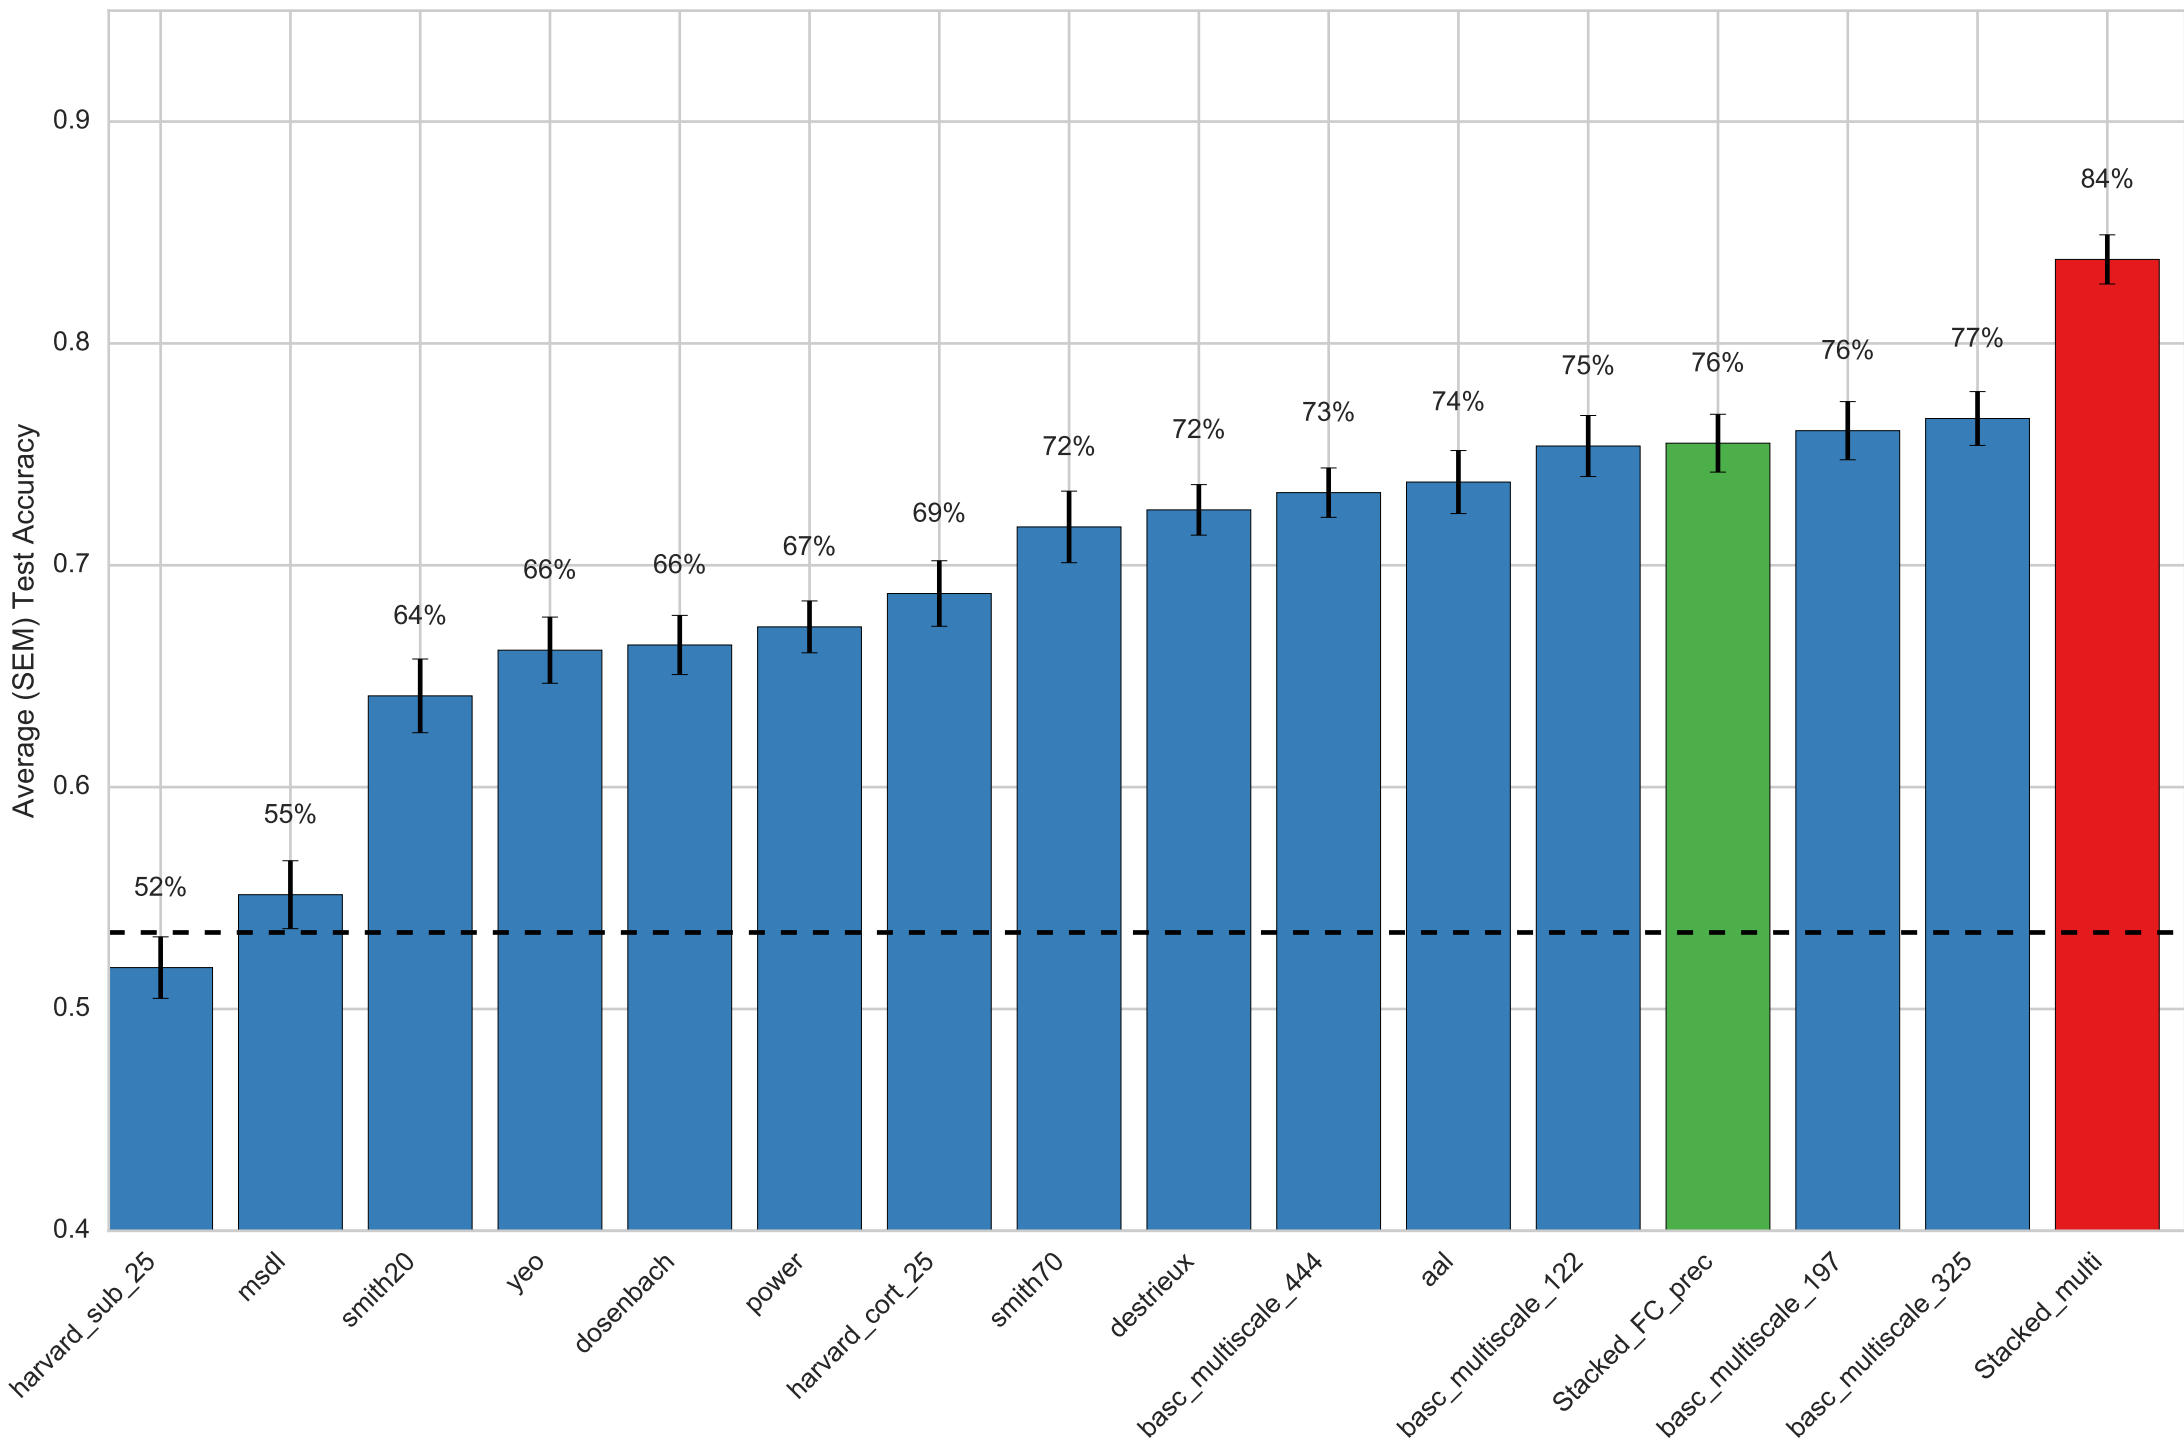

ReHo : Top 30% FC, 100% regional Feature Selection  
Comparison across 14 parcellations and stacked predictions  
10 fold cross-validation - 5 shuffled iterations

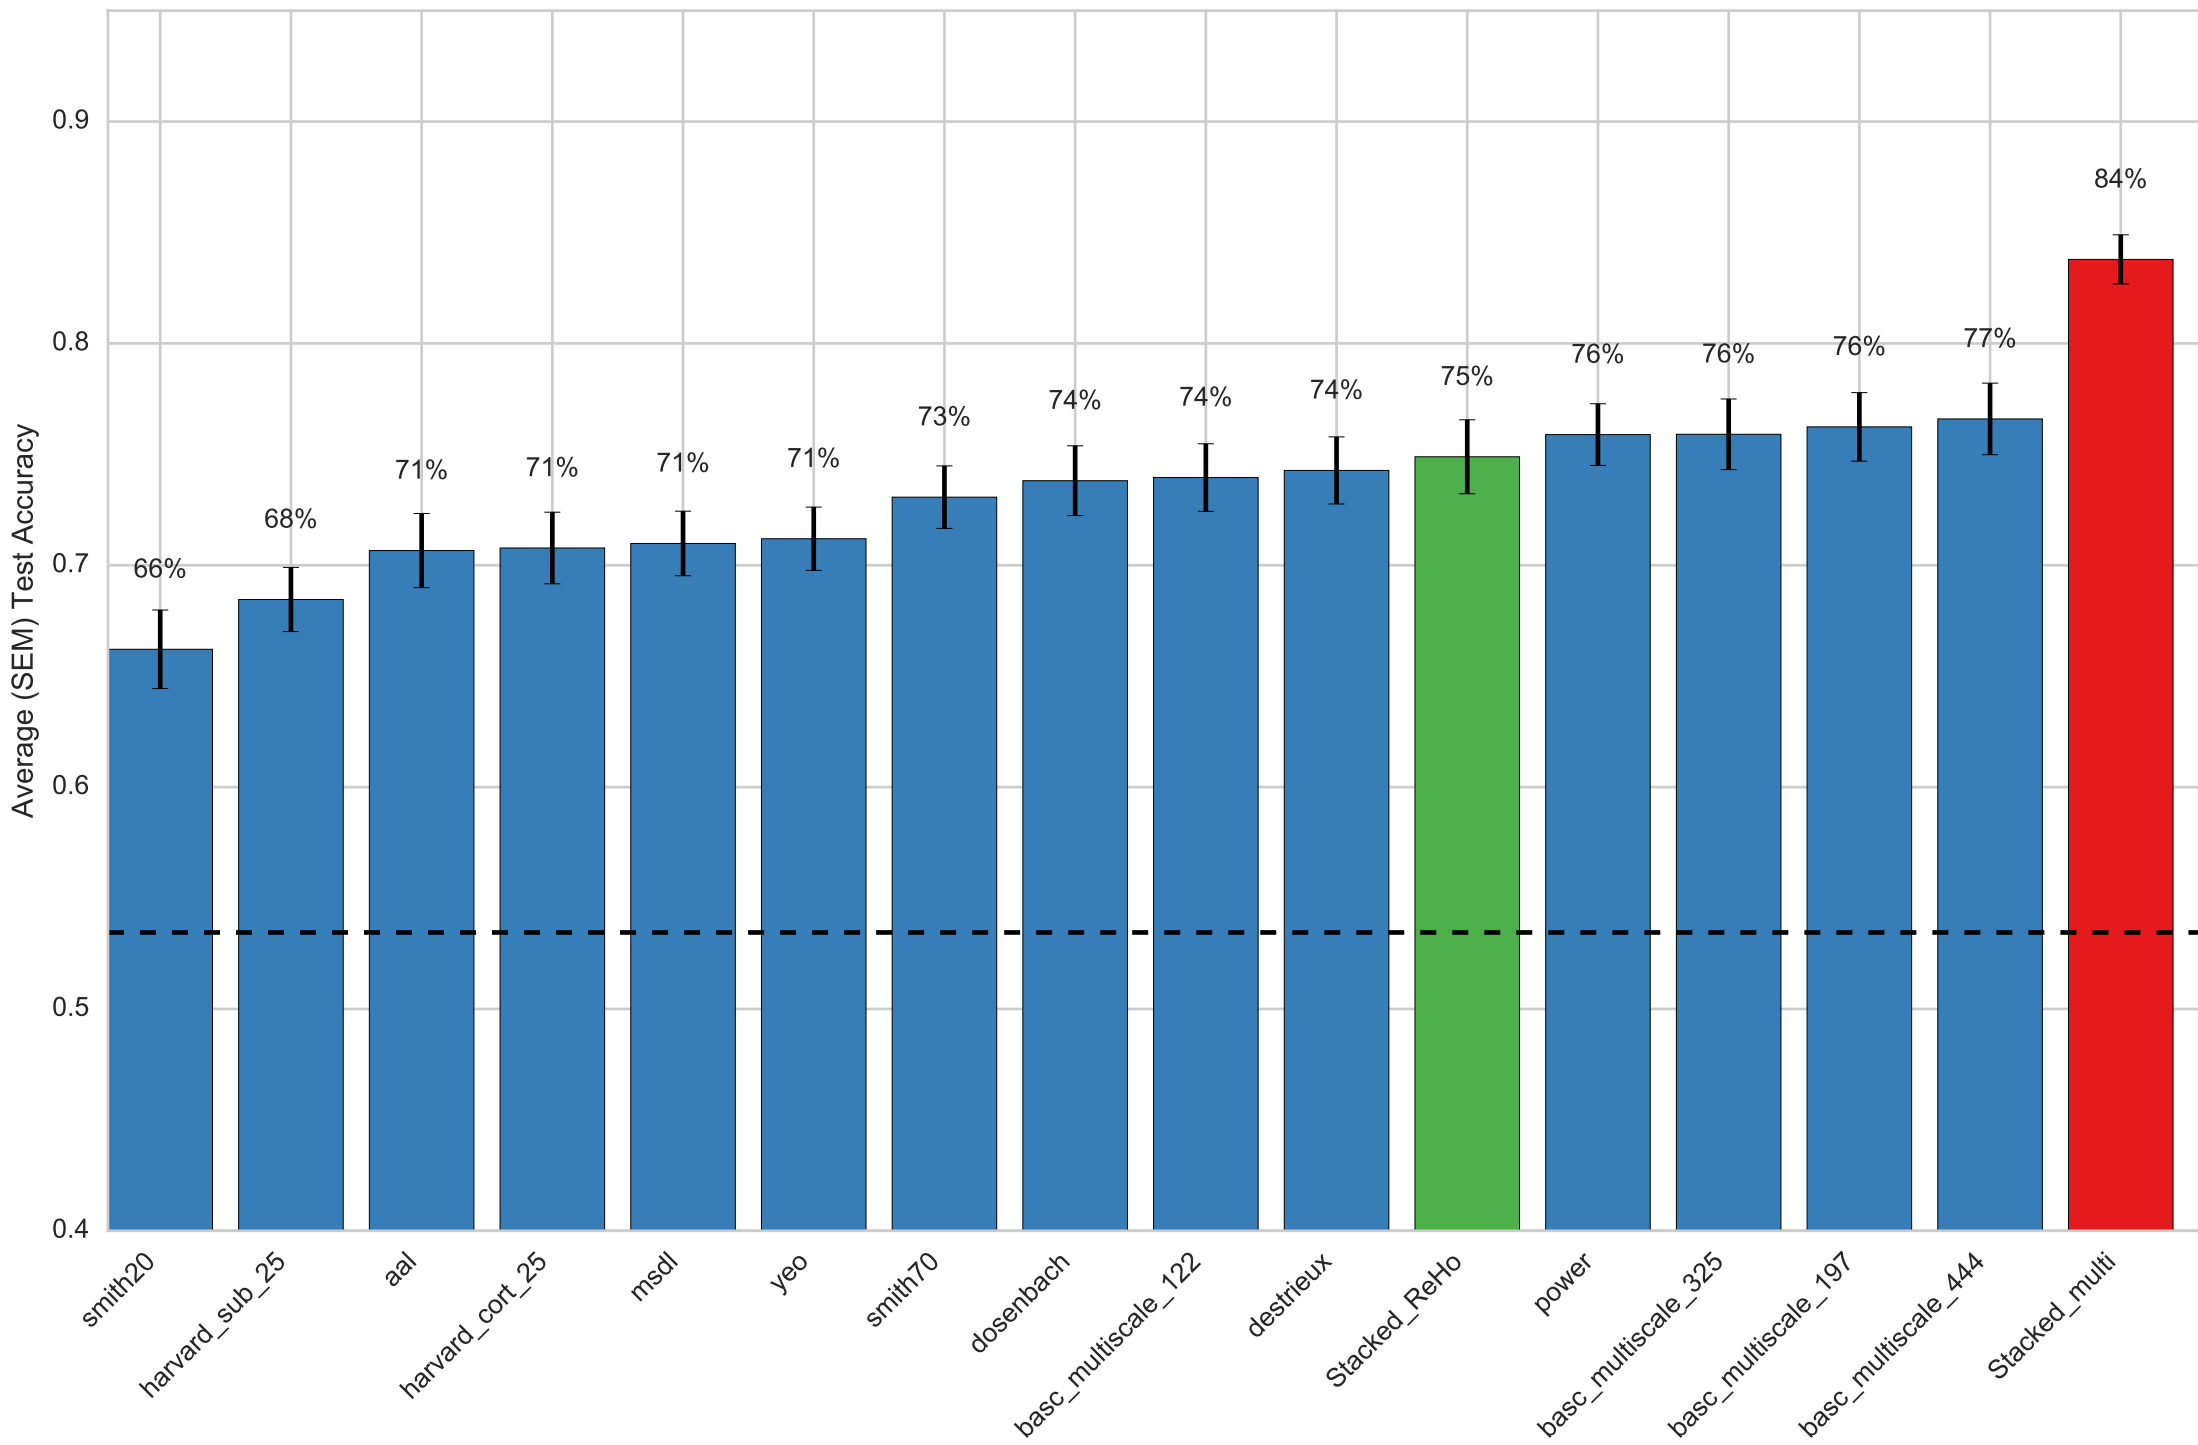

ALFF : Top 30% FC, 100% regional Feature Selection  
Comparison across 14 parcellations and stacked predictions  
10 fold cross-validation - 5 shuffled iterations

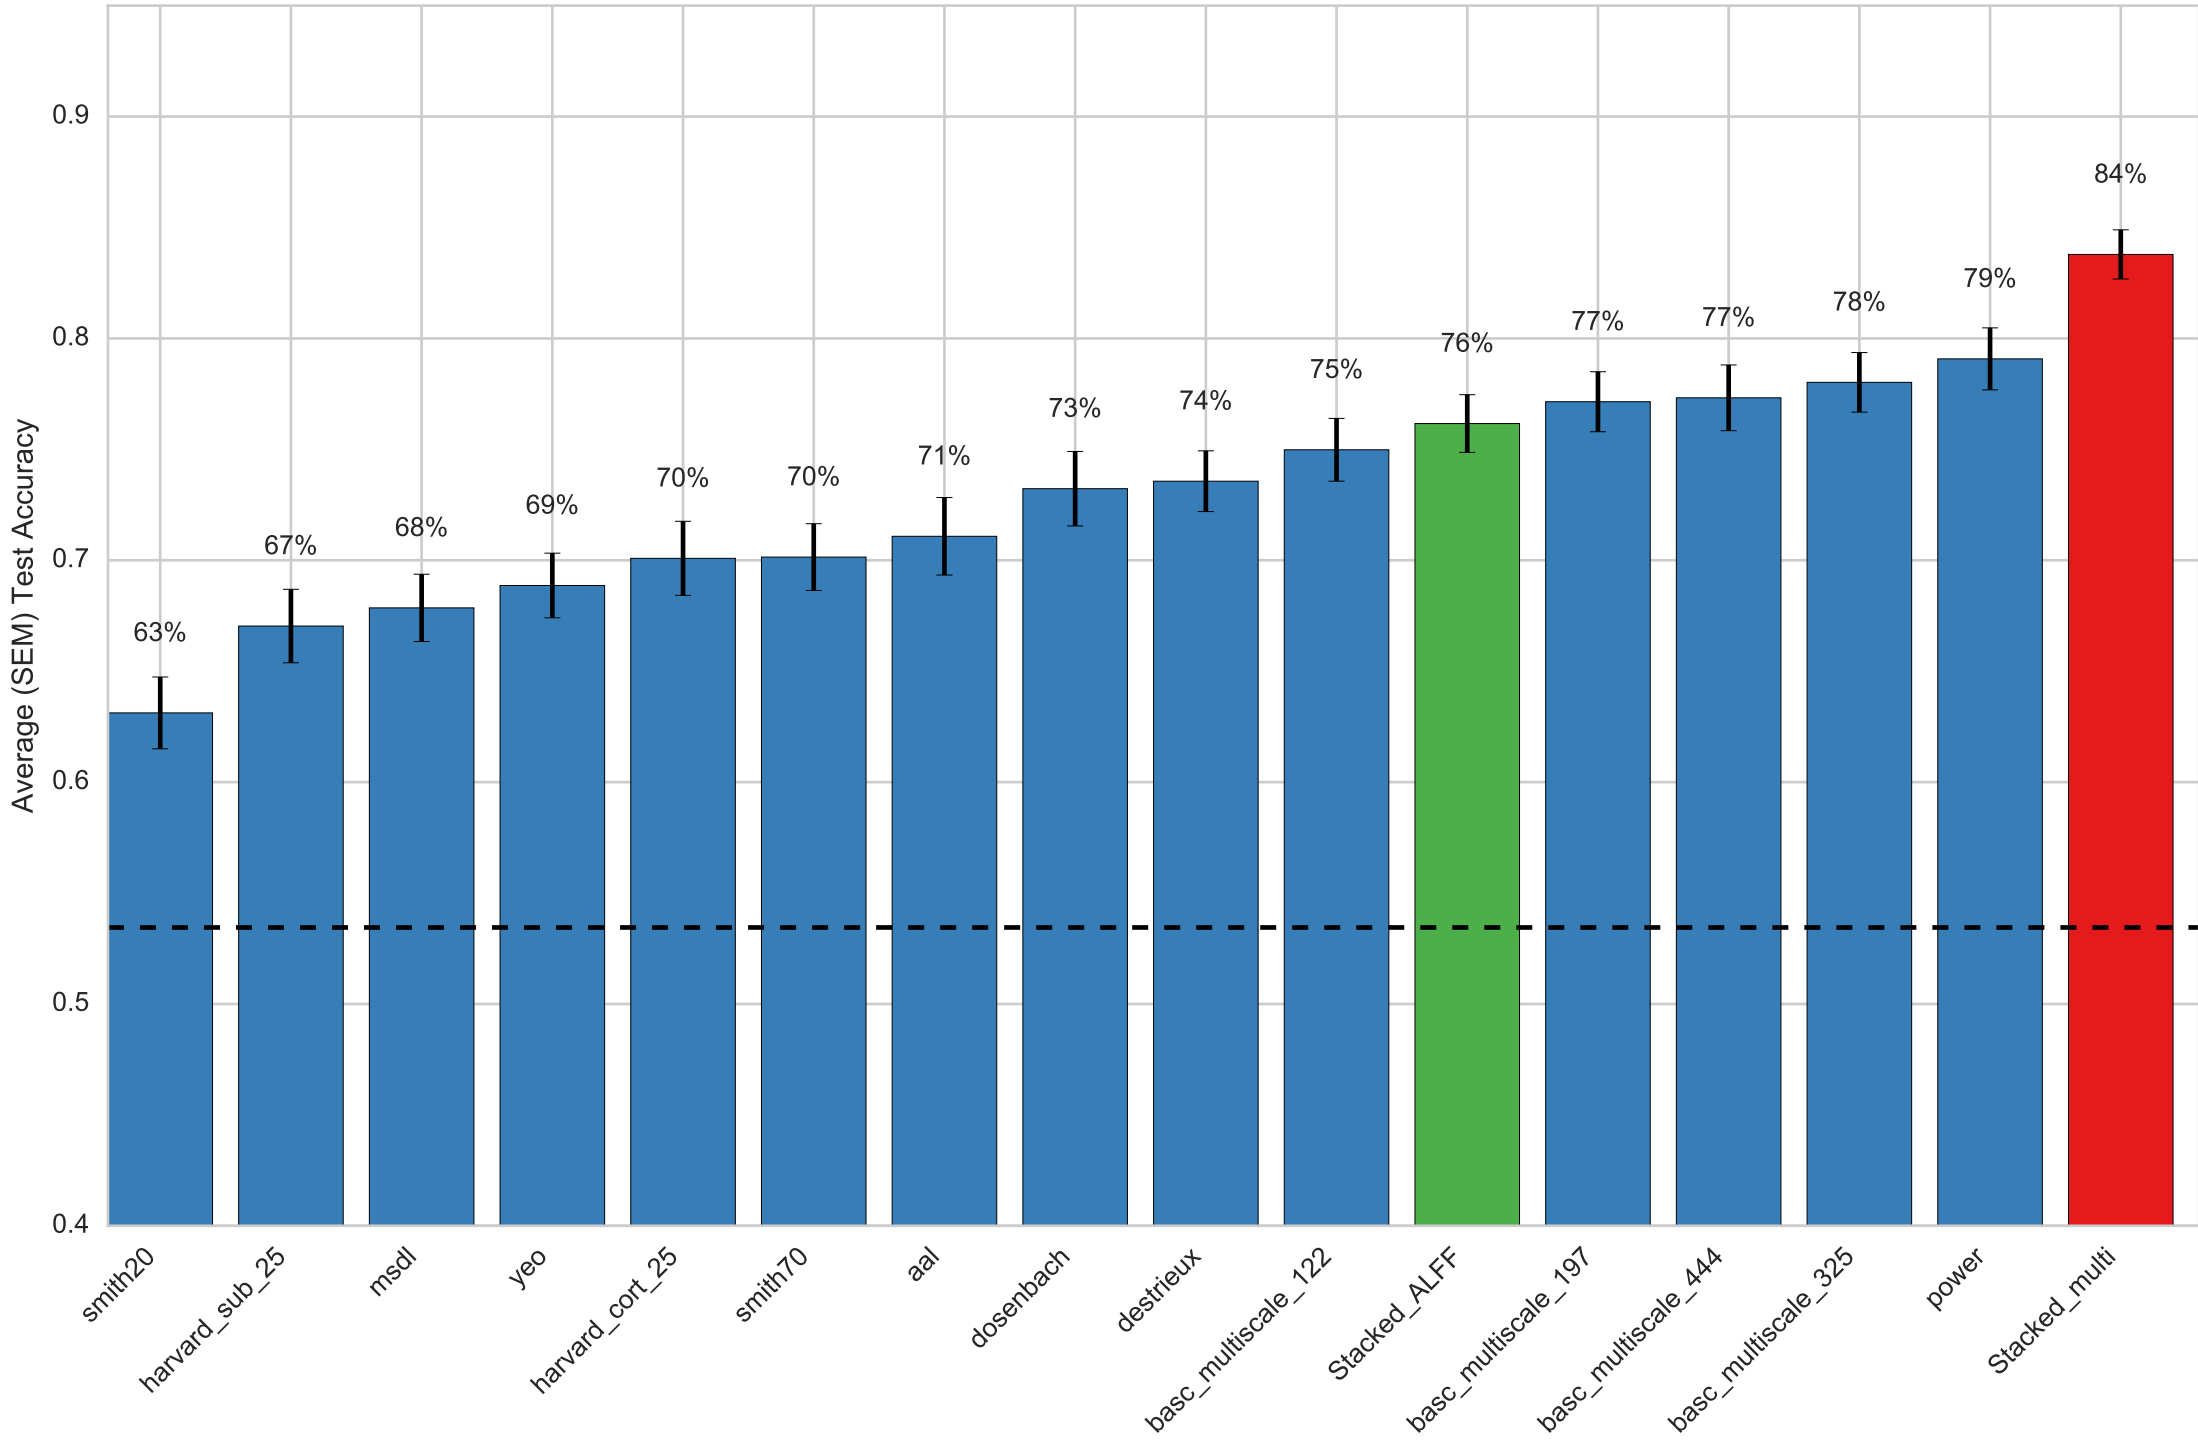

Feature selection / reduction method :Top 20% Feature Selection

fALFF : Top 20% Feature Selection  
Comparison across 14 parcellations and stacked predictions  
10 fold cross-validation - 5 shuffled iterations

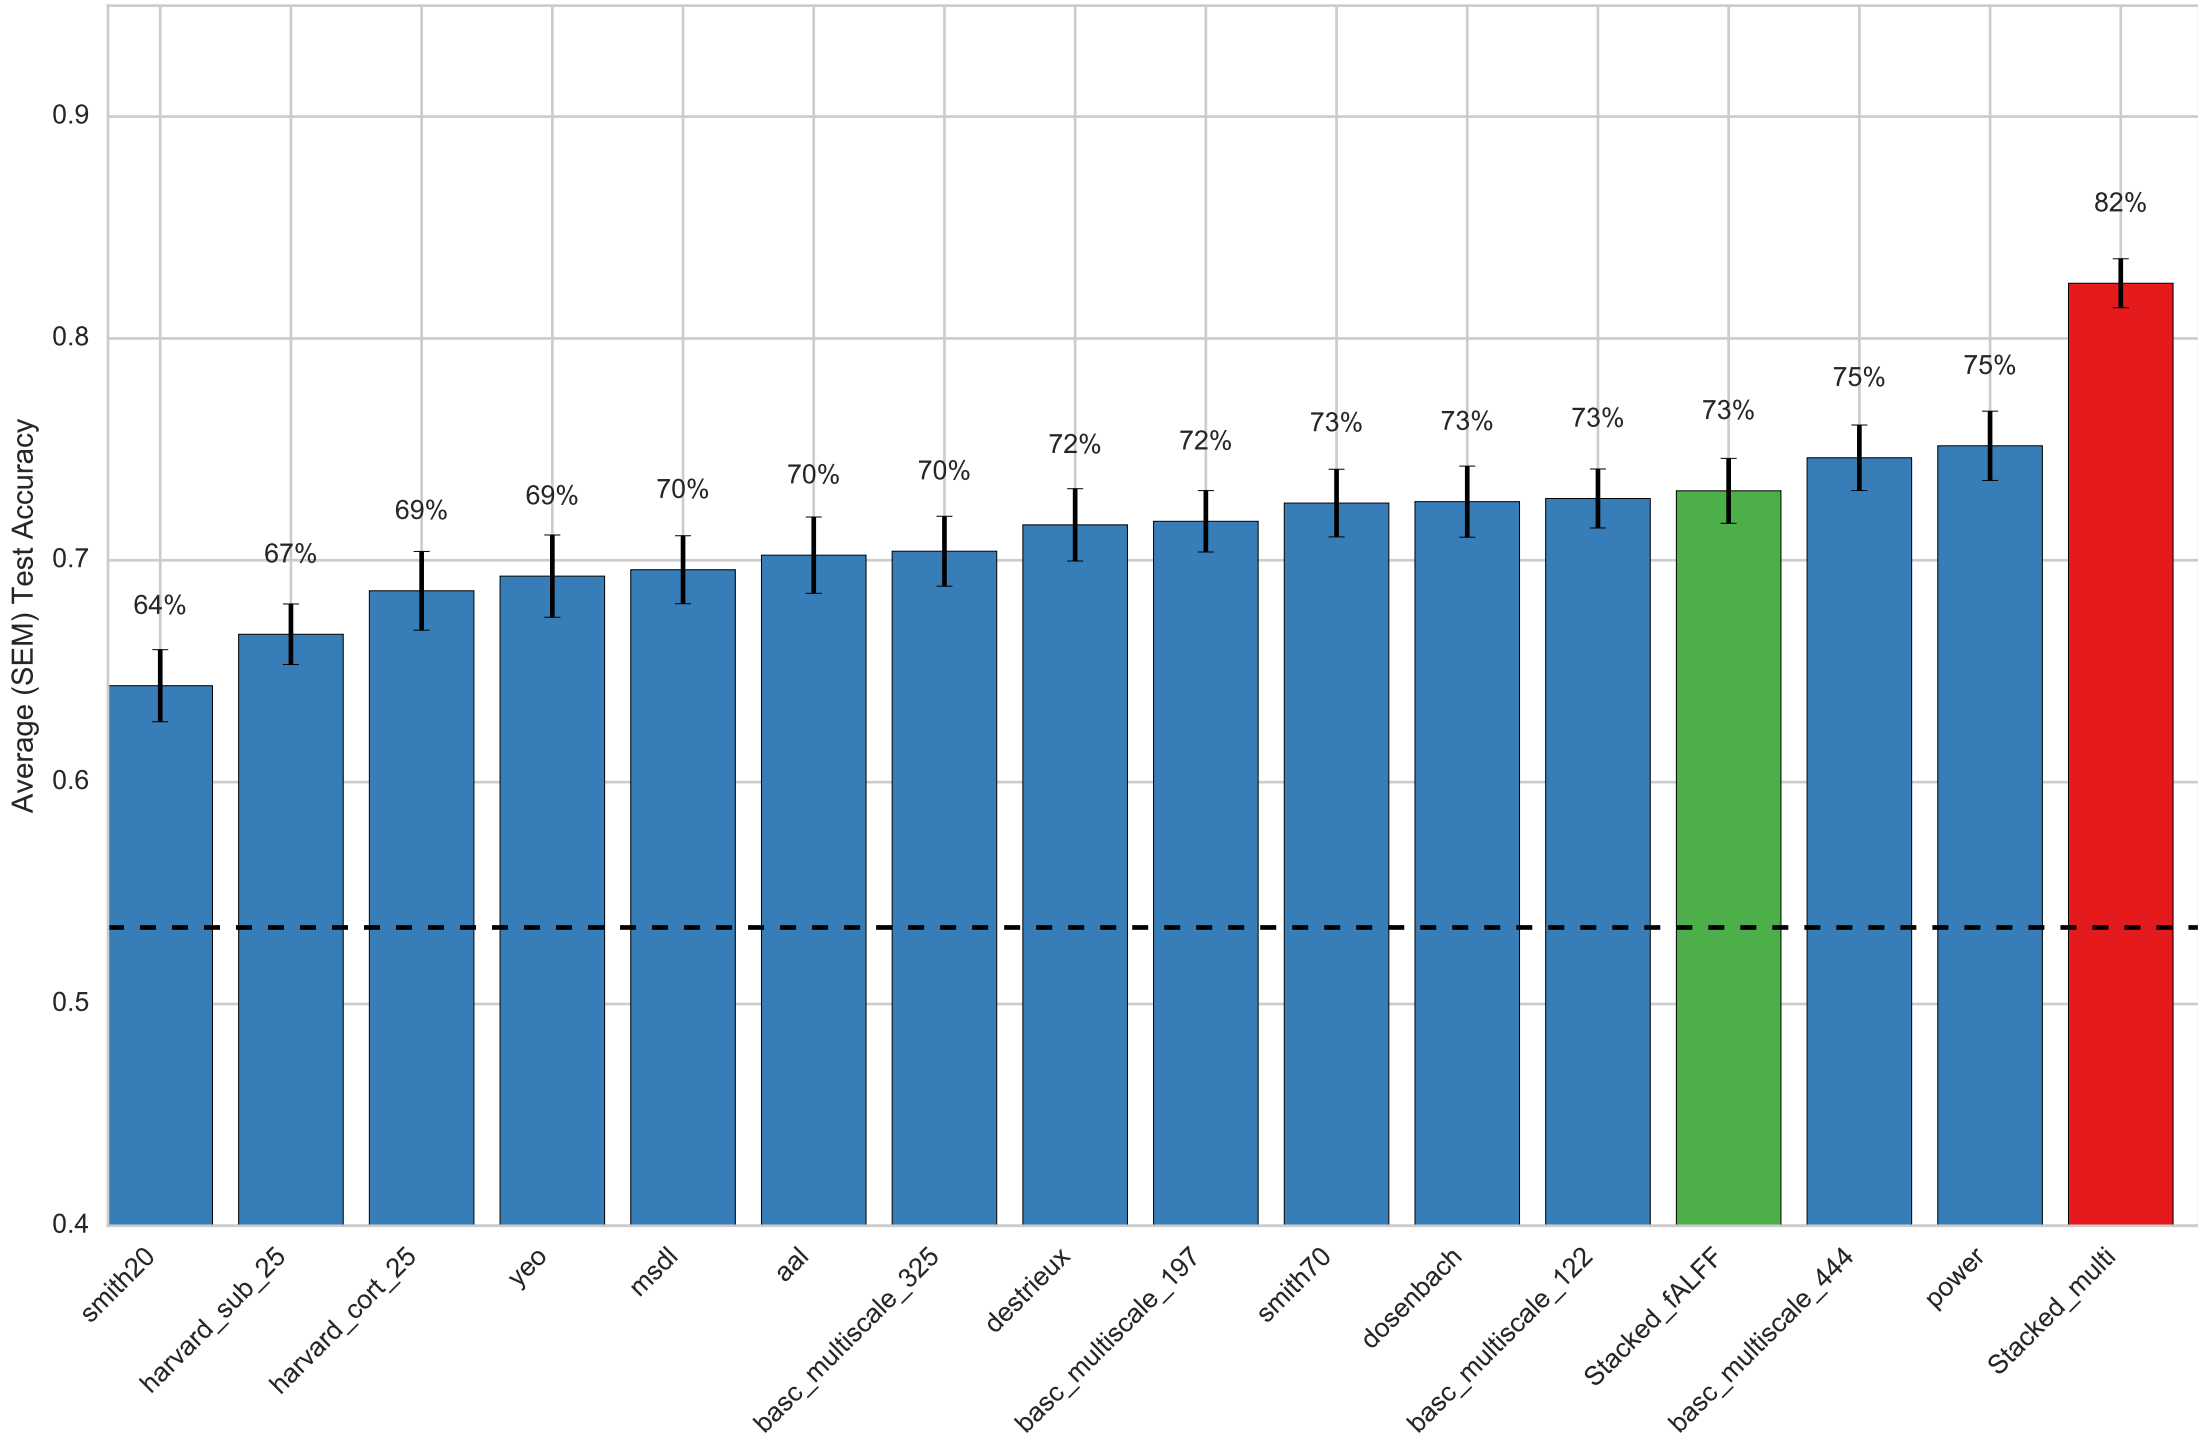



FC\_corr : Top 20% Feature Selection  
Comparison across 14 parcellations and stacked predictions  
10 fold cross-validation - 5 shuffled iterations

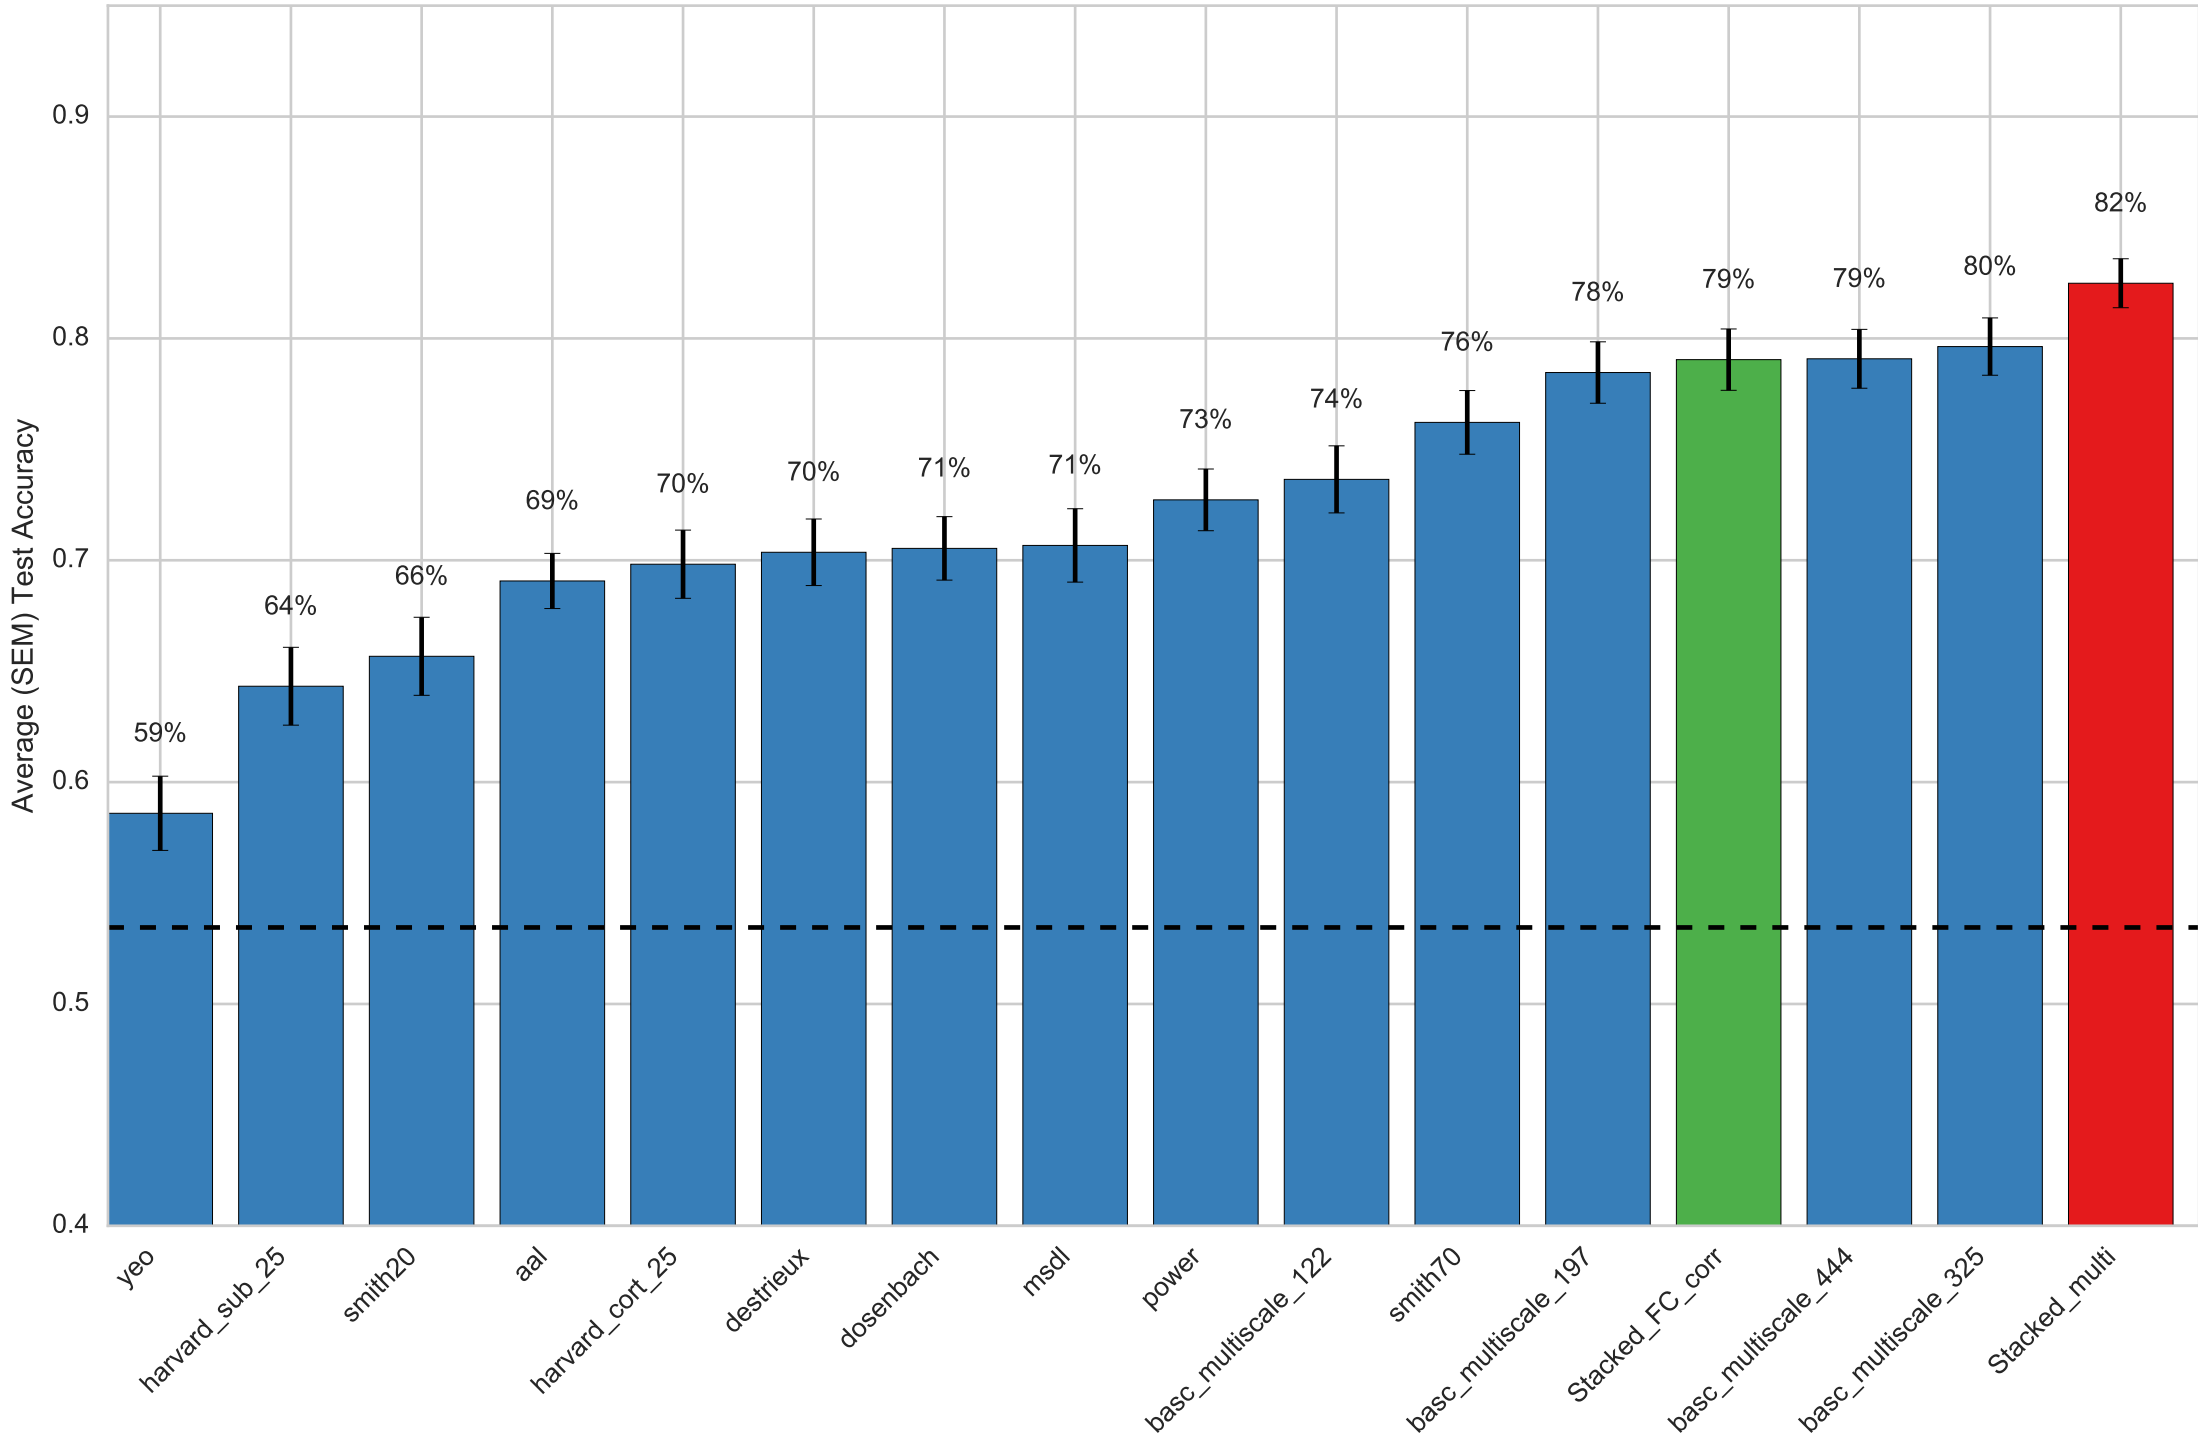

FC\_part : Top 20% Feature Selection  
Comparison across 14 parcellations and stacked predictions  
10 fold cross-validation - 5 shuffled iterations

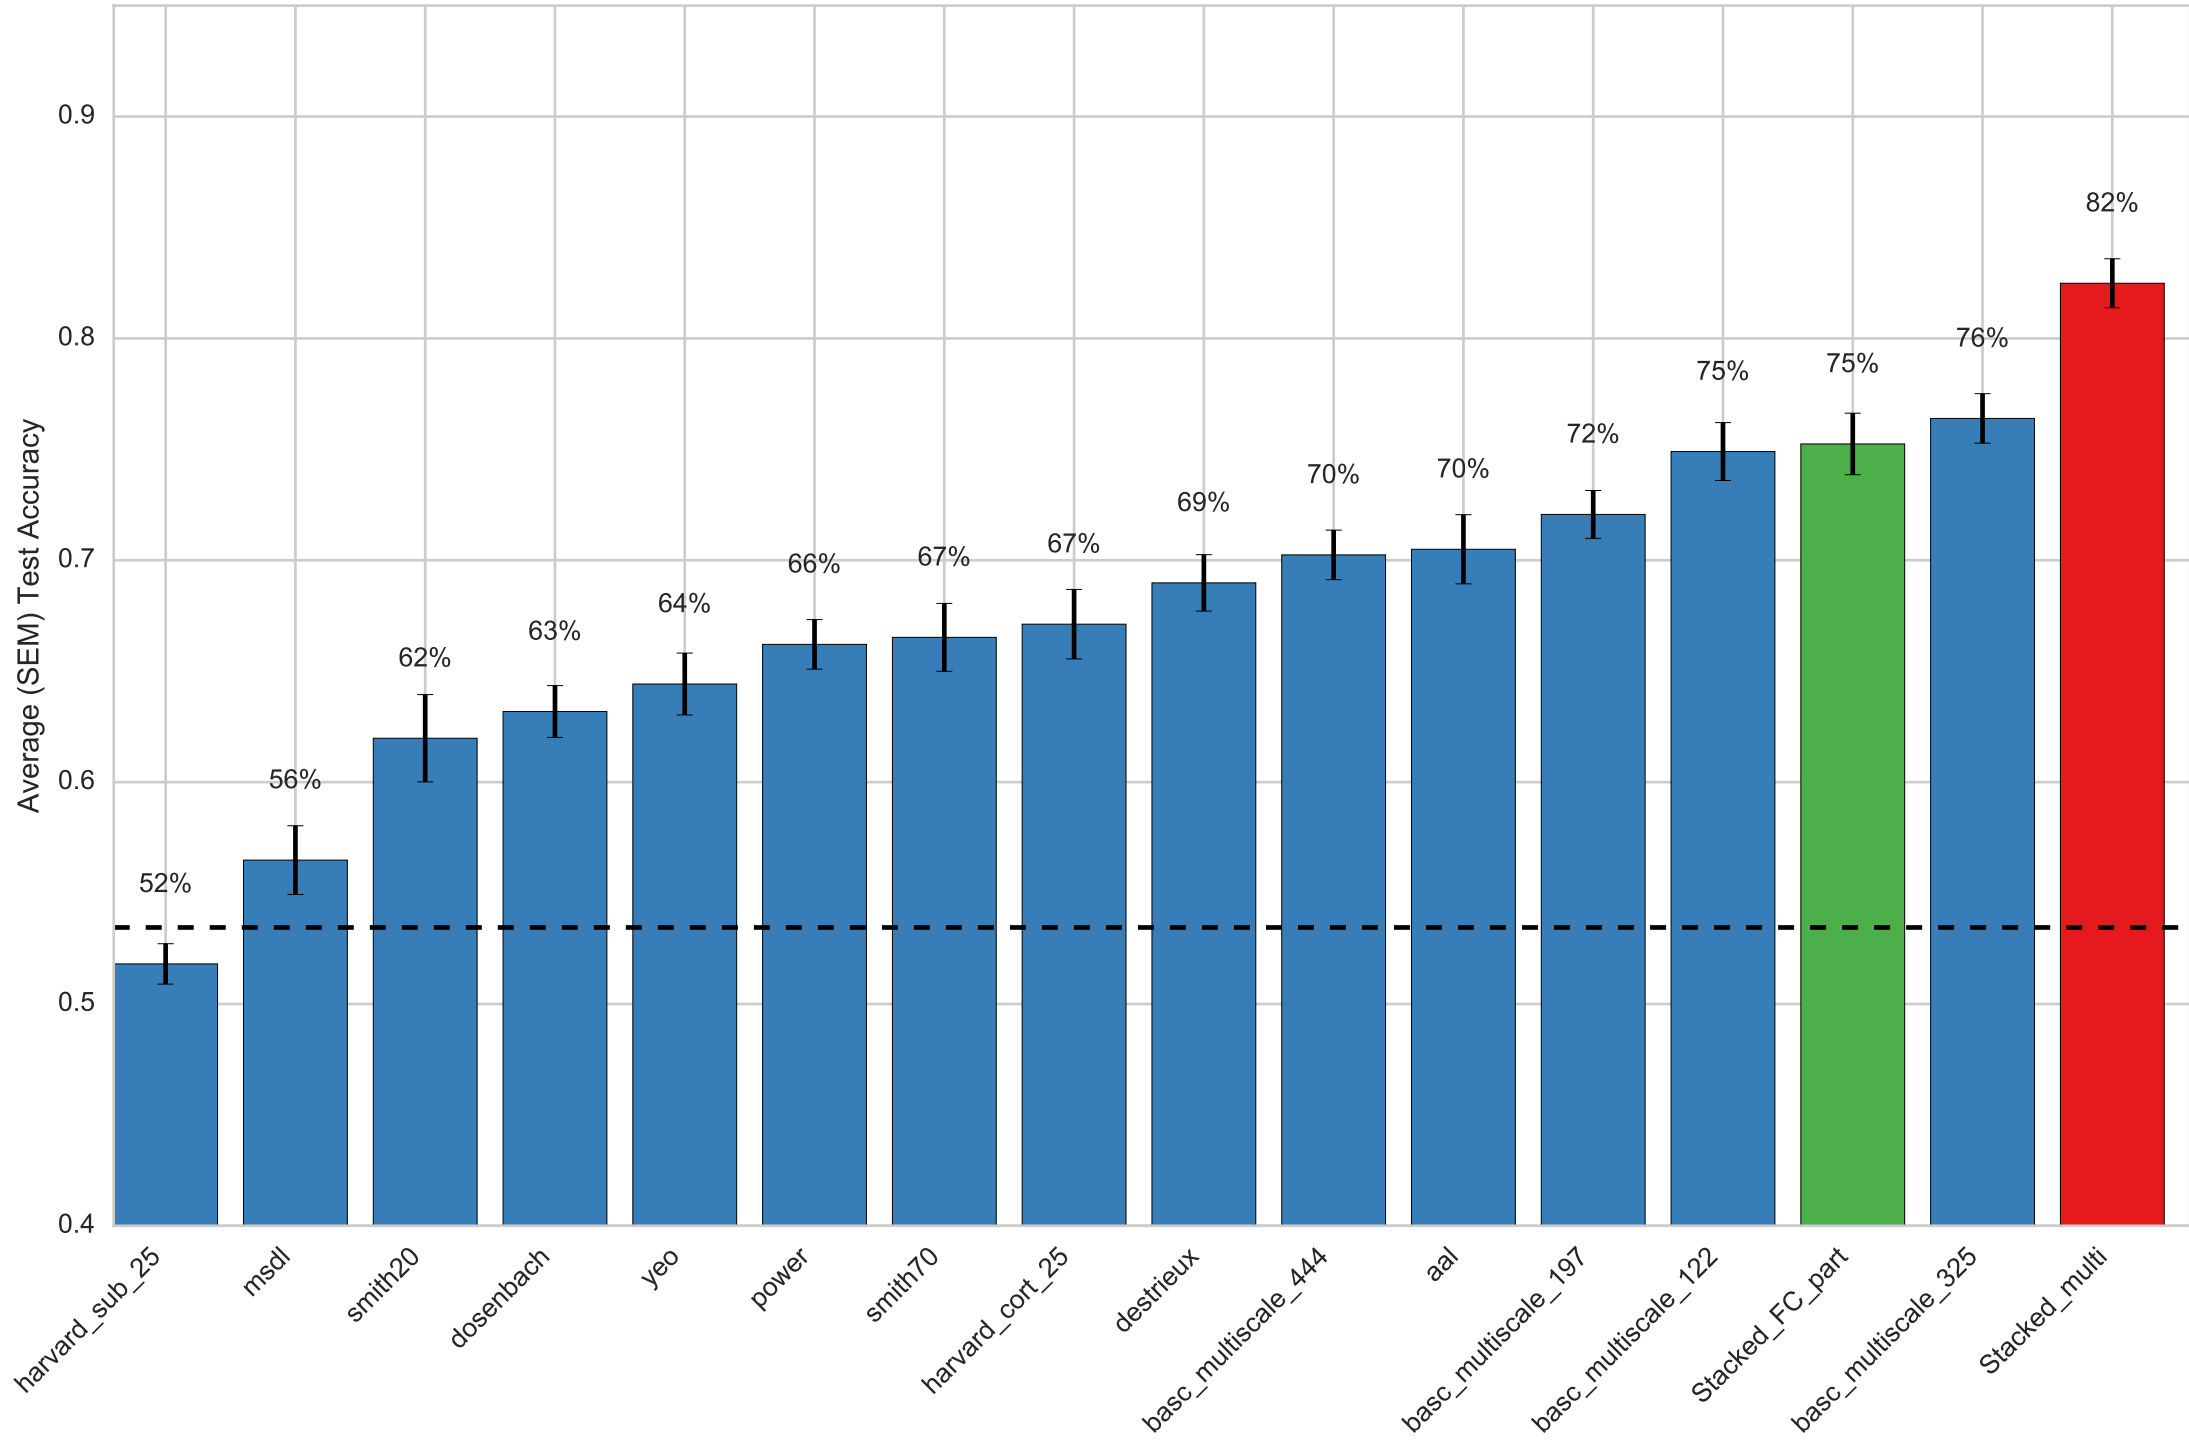

FC\_prec : Top 20% Feature Selection  
Comparison across 14 parcellations and stacked predictions  
10 fold cross-validation - 5 shuffled iterations

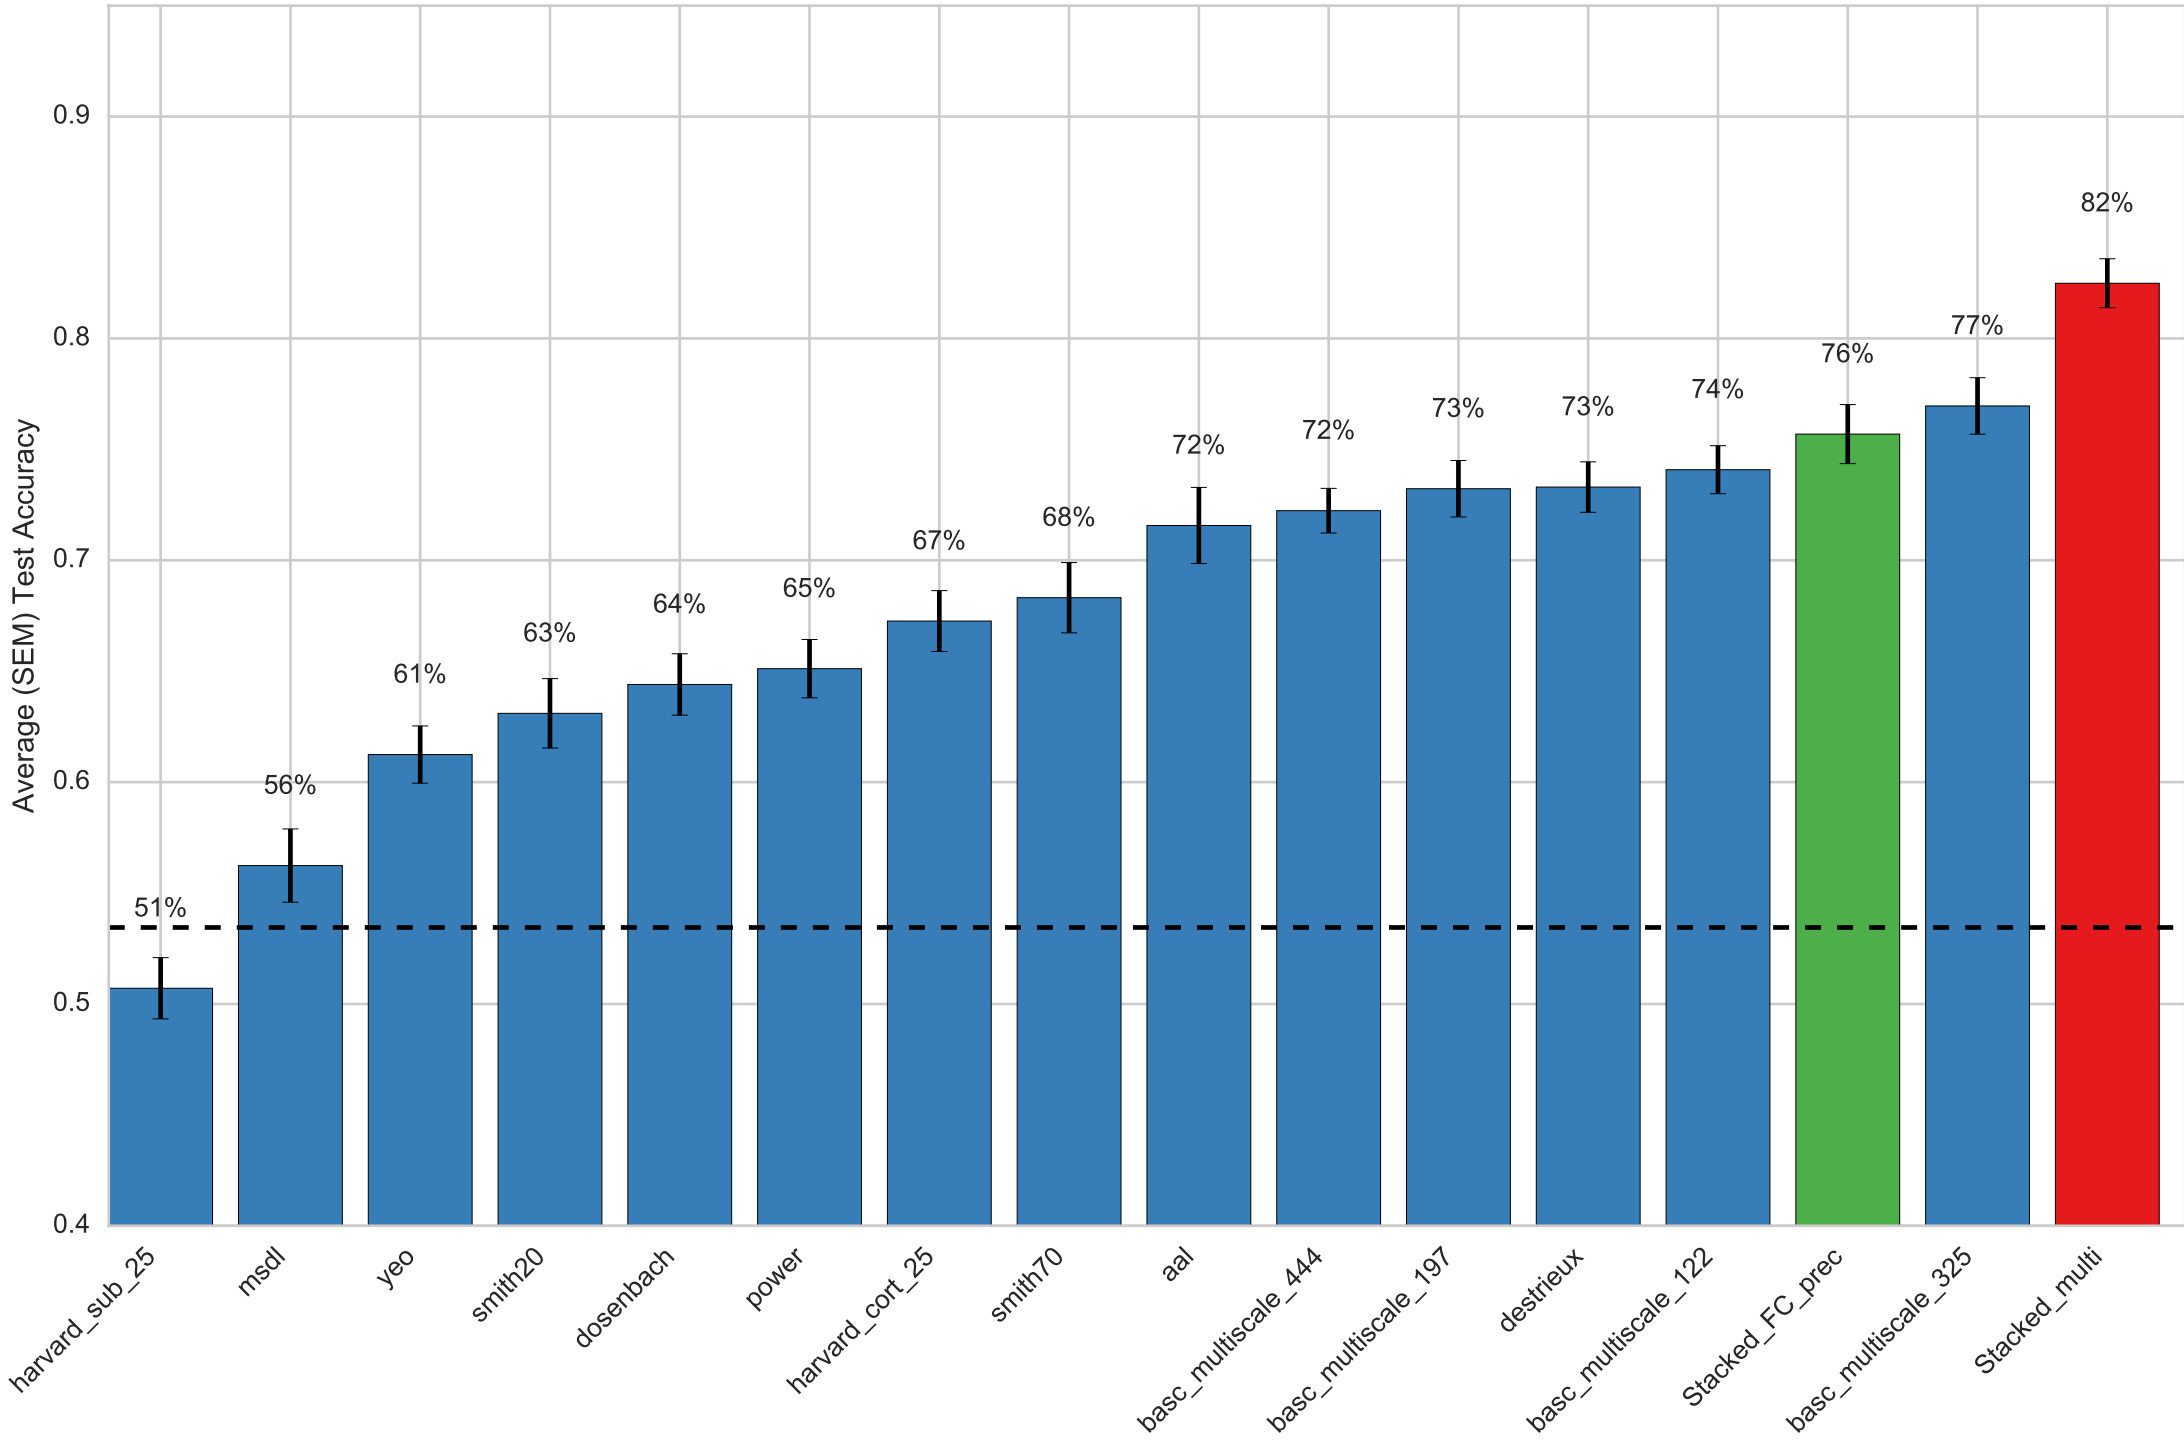

ReHo : Top 20% Feature Selection  
Comparison across 14 parcellations and stacked predictions  
10 fold cross-validation - 5 shuffled iterations

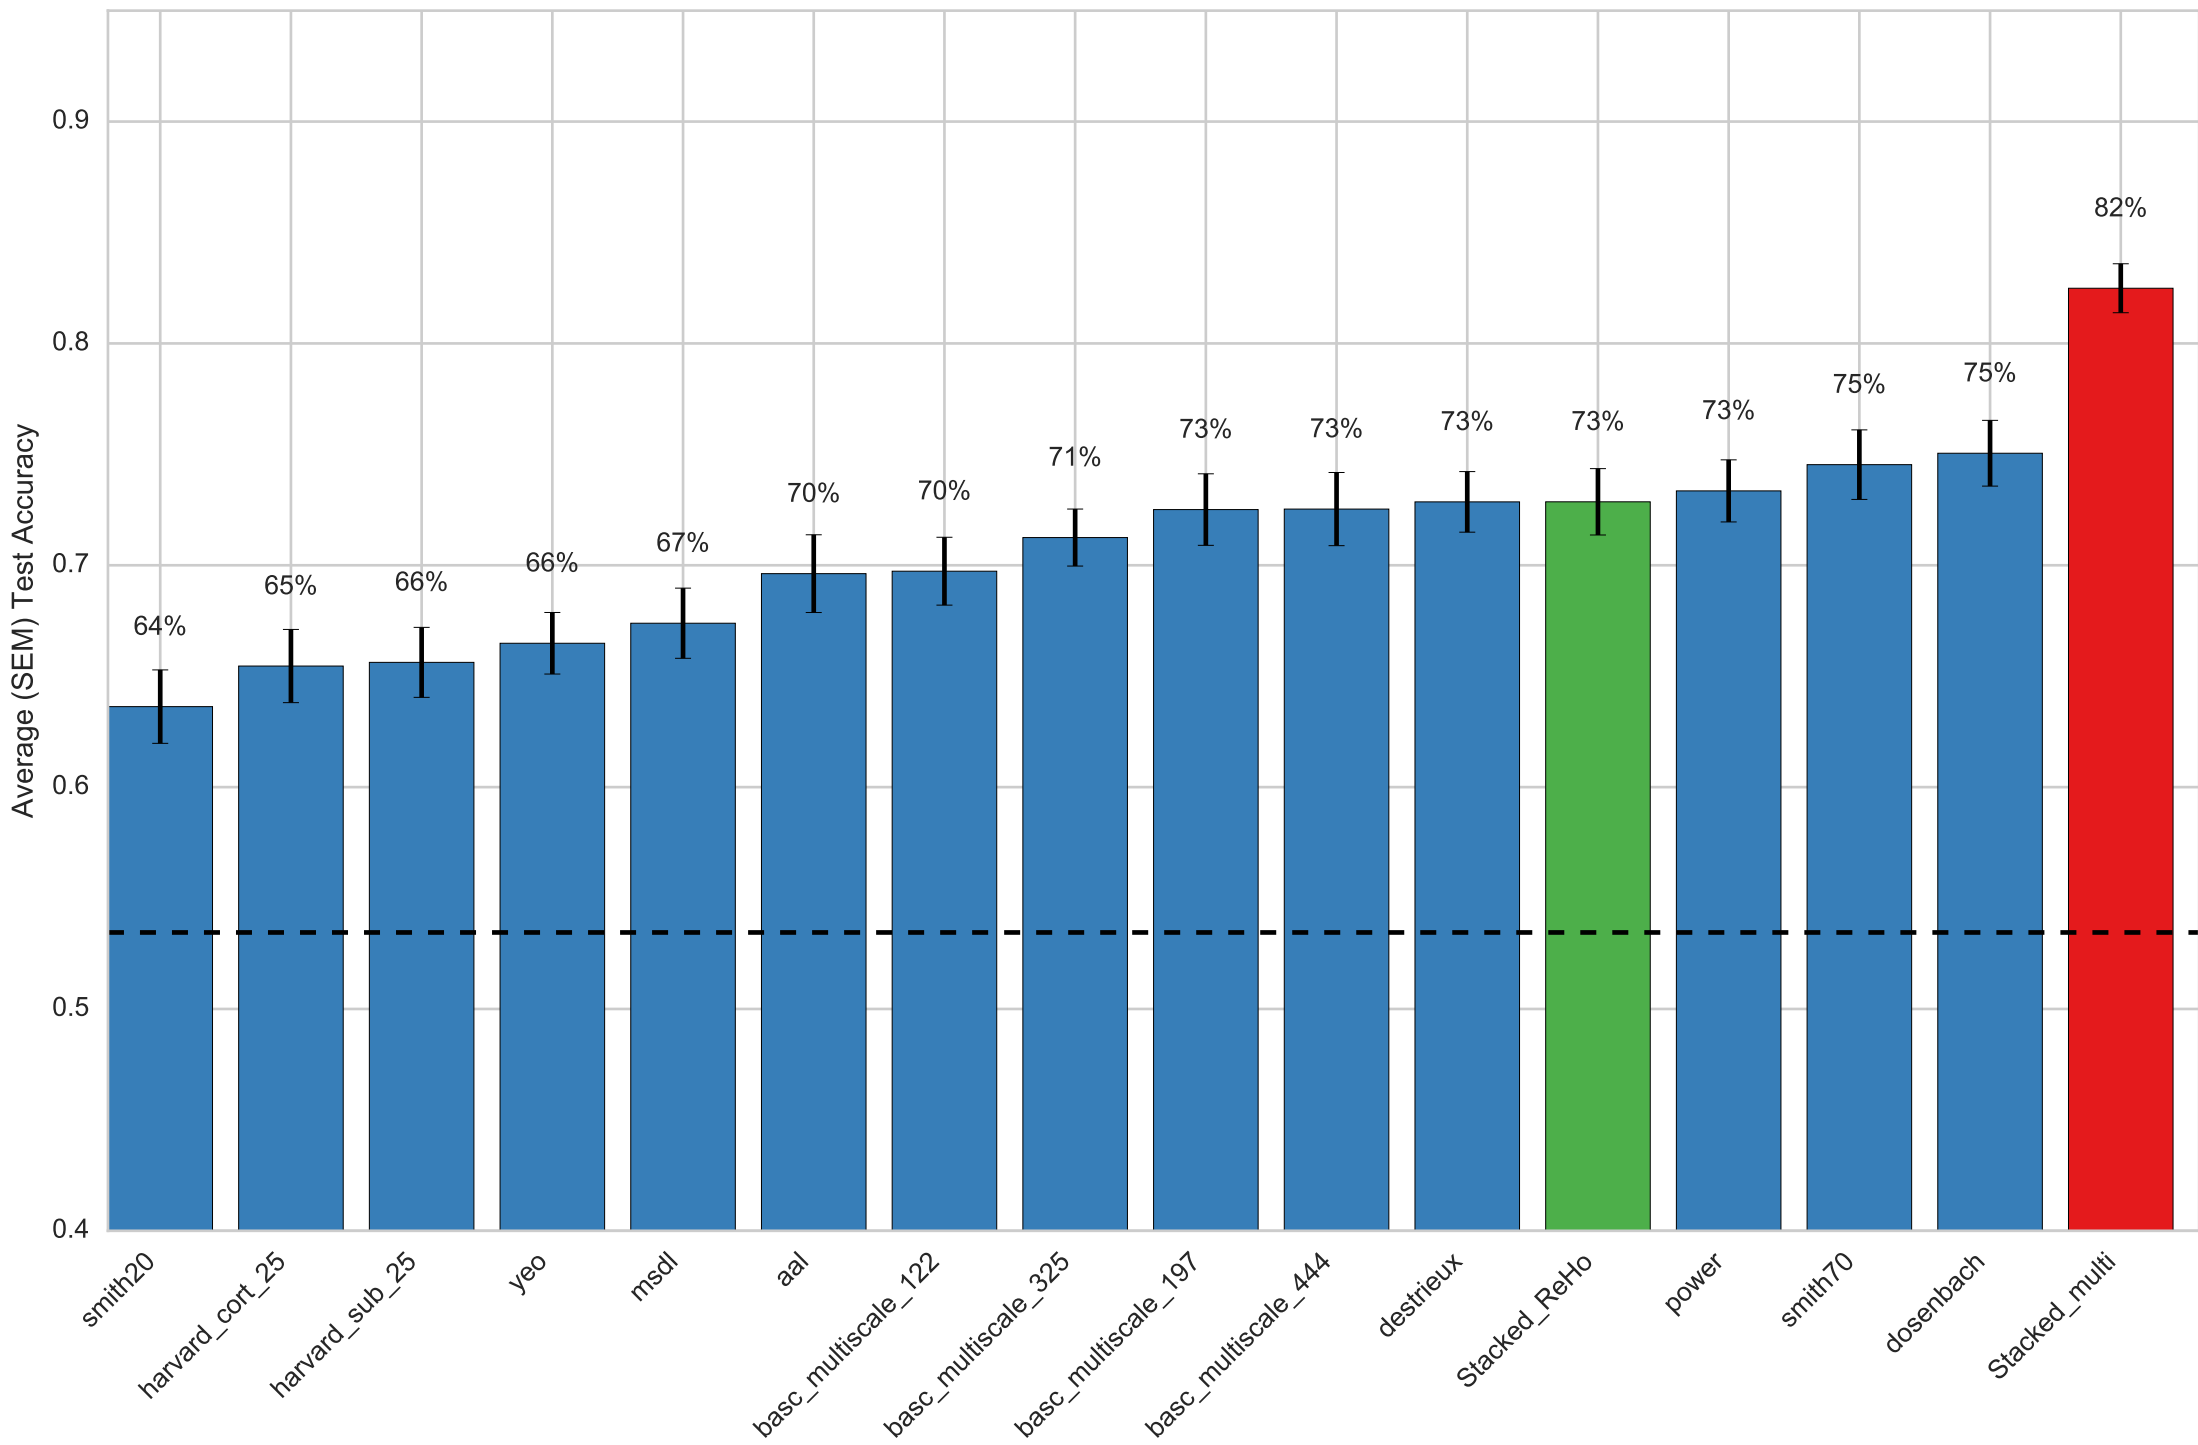

ALFF : Top 20% Feature Selection  
Comparison across 14 parcellations and stacked predictions  
10 fold cross-validation - 5 shuffled iterations

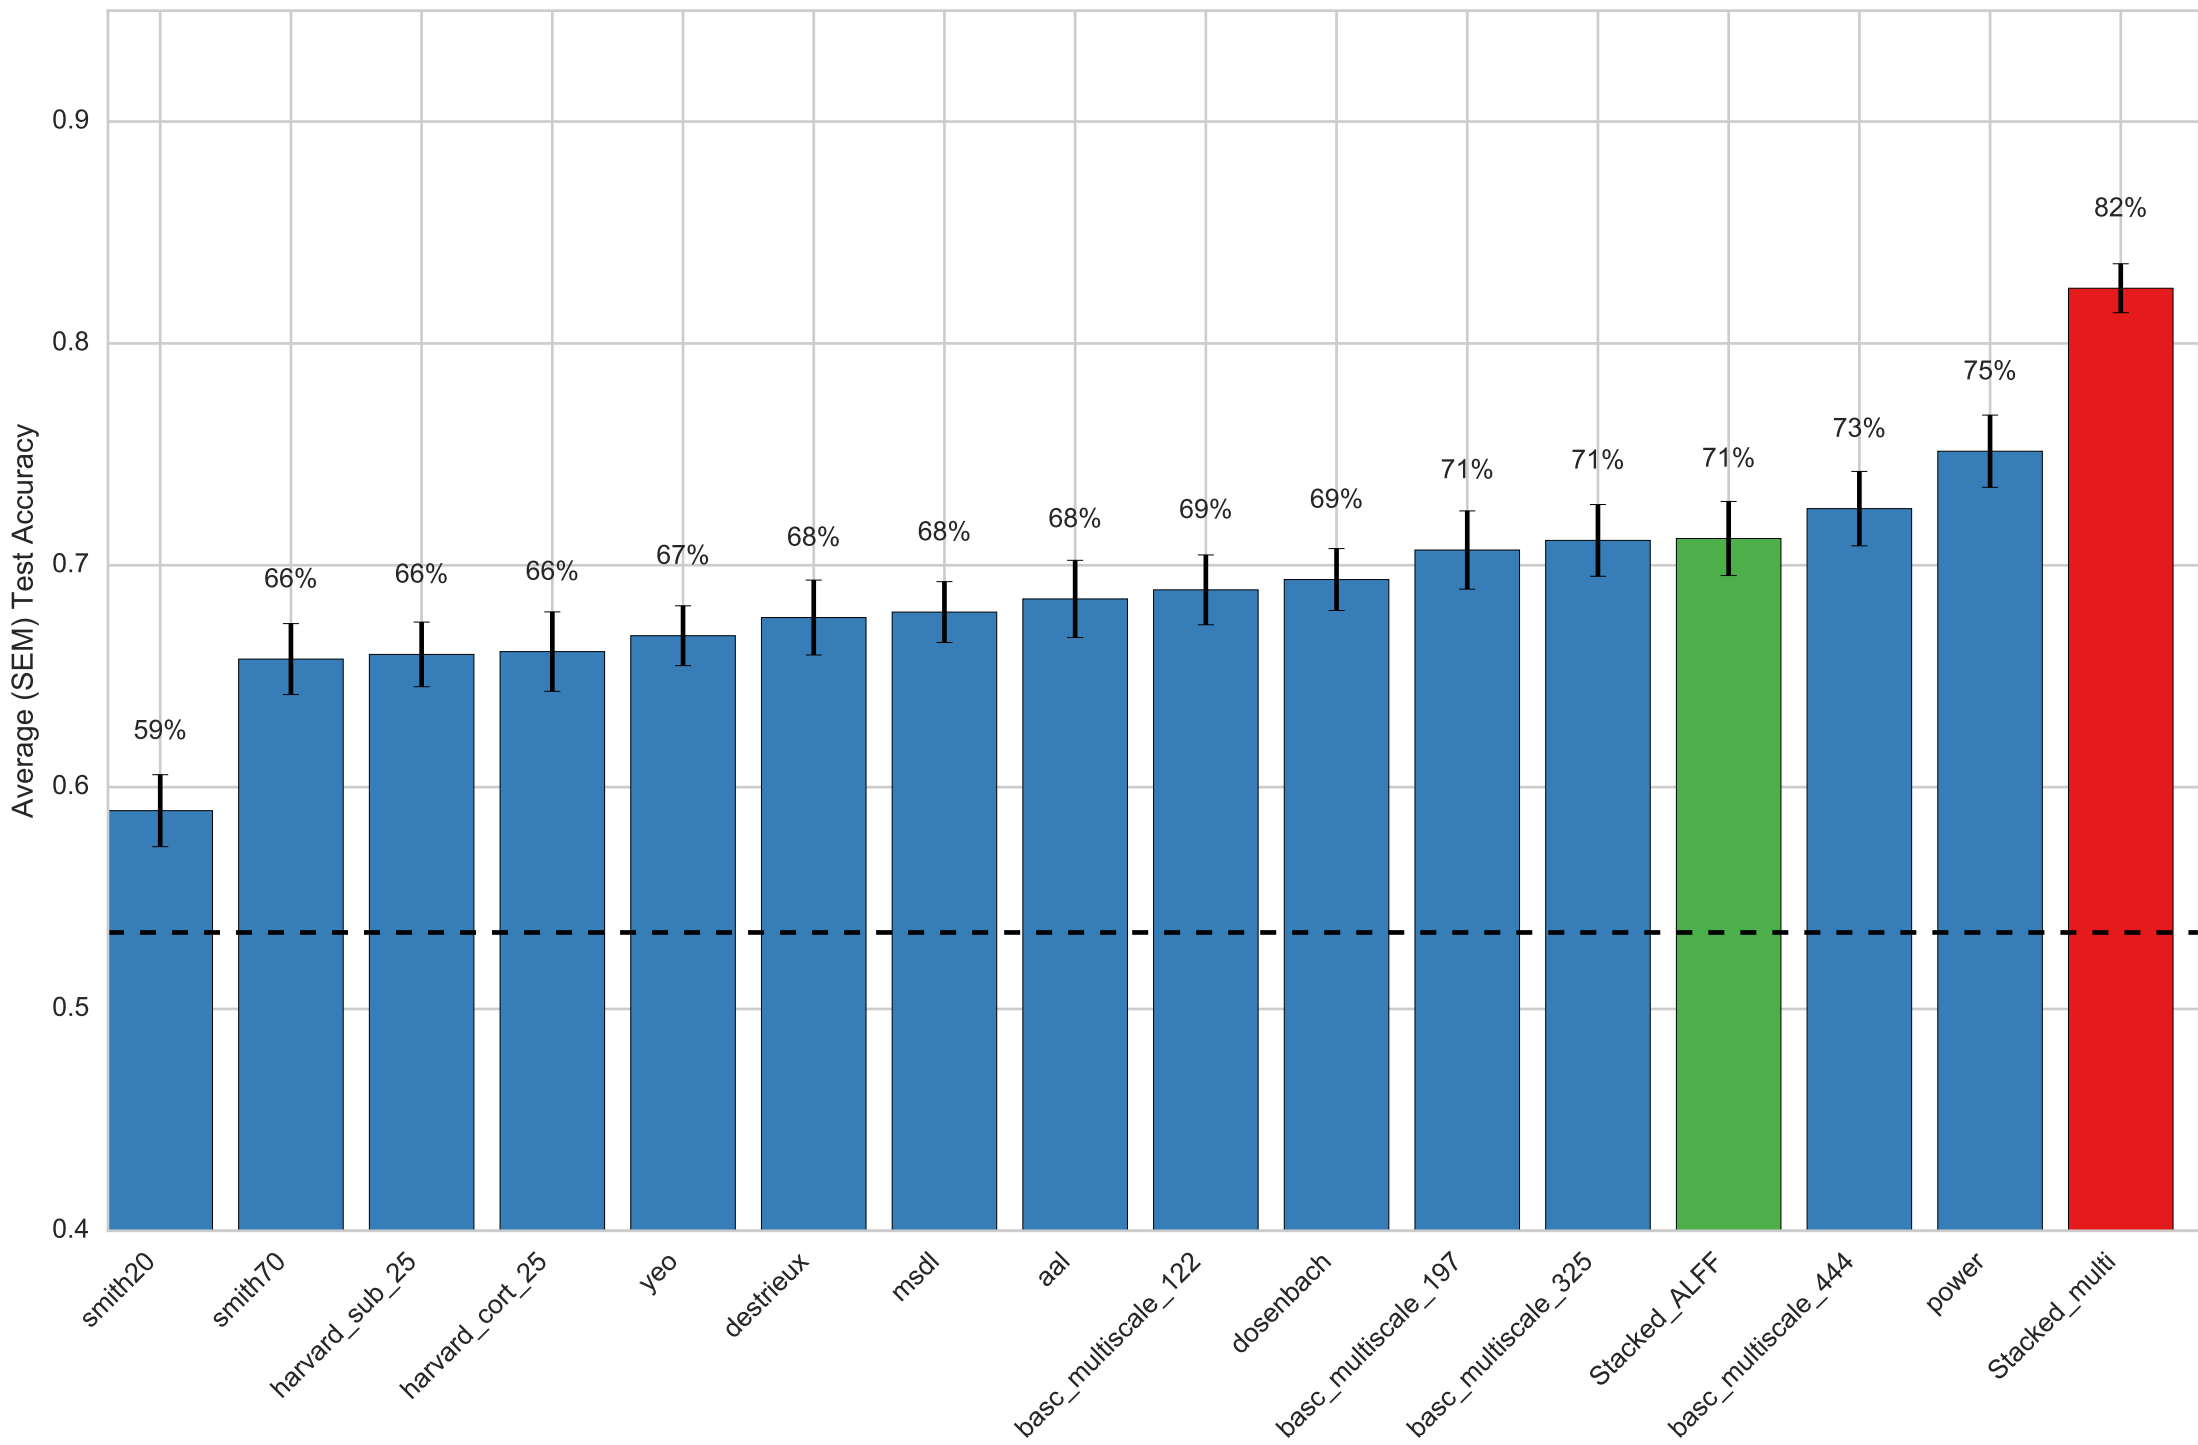

Feature selection / reduction method :100% Features

fALFF : 100% Features  
Comparison across 14 parcellations and stacked predictions  
10 fold cross-validation - 5 shuffled iterations

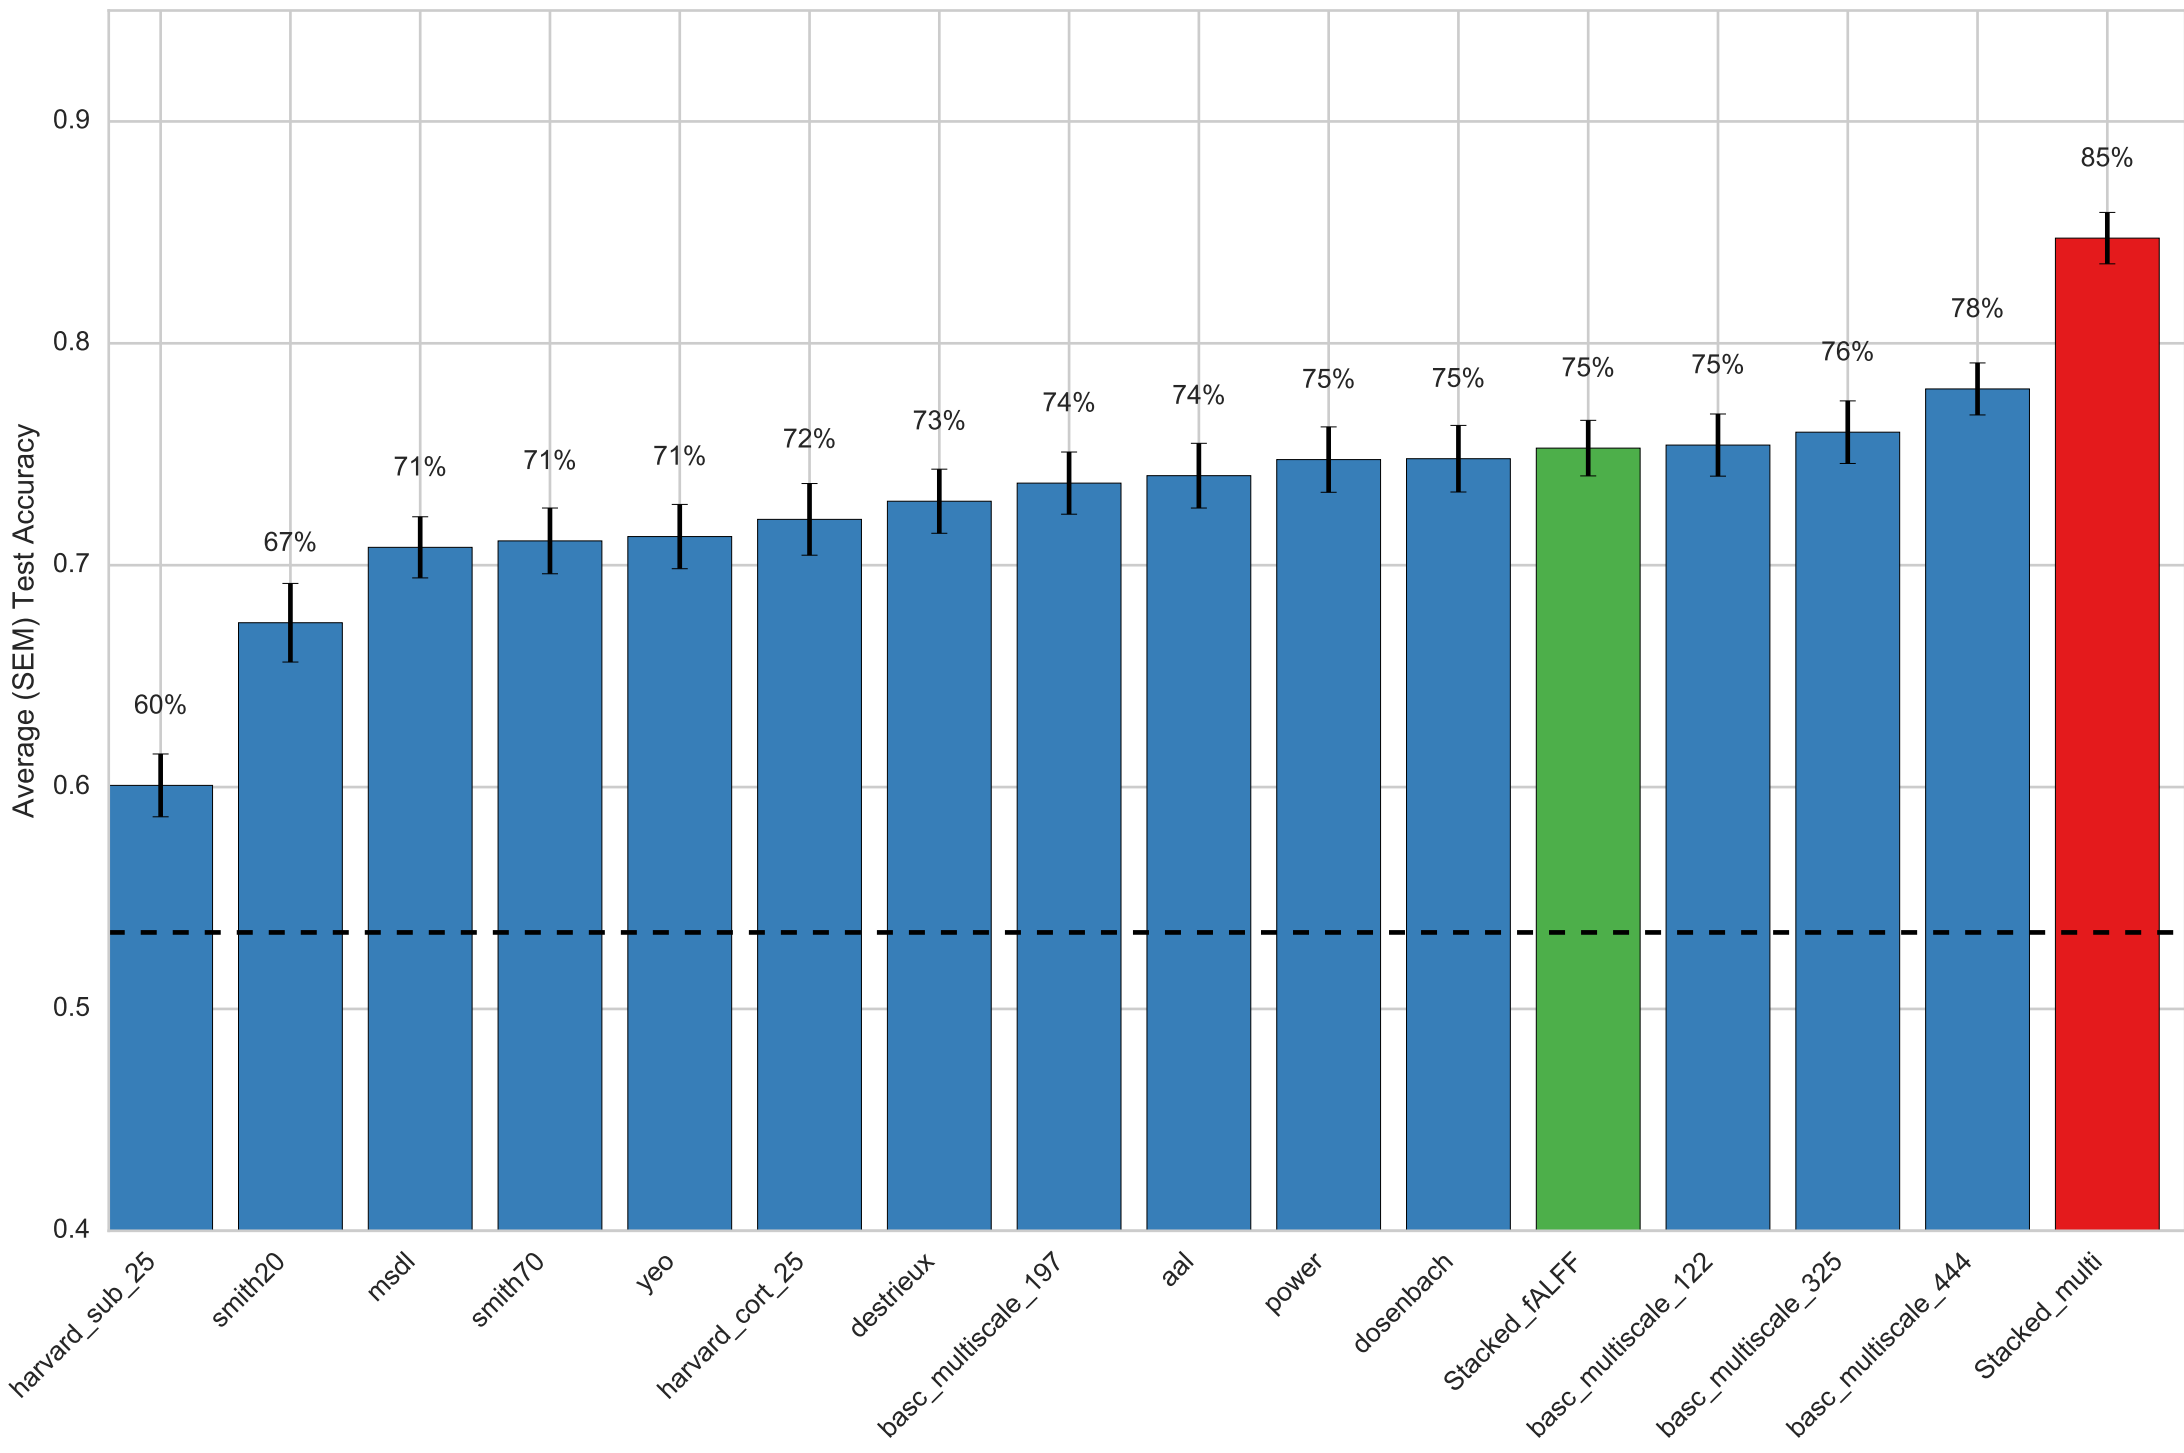

FC\_corr : 100% Features  
Comparison across 14 parcellations and stacked predictions  
10 fold cross-validation - 5 shuffled iterations

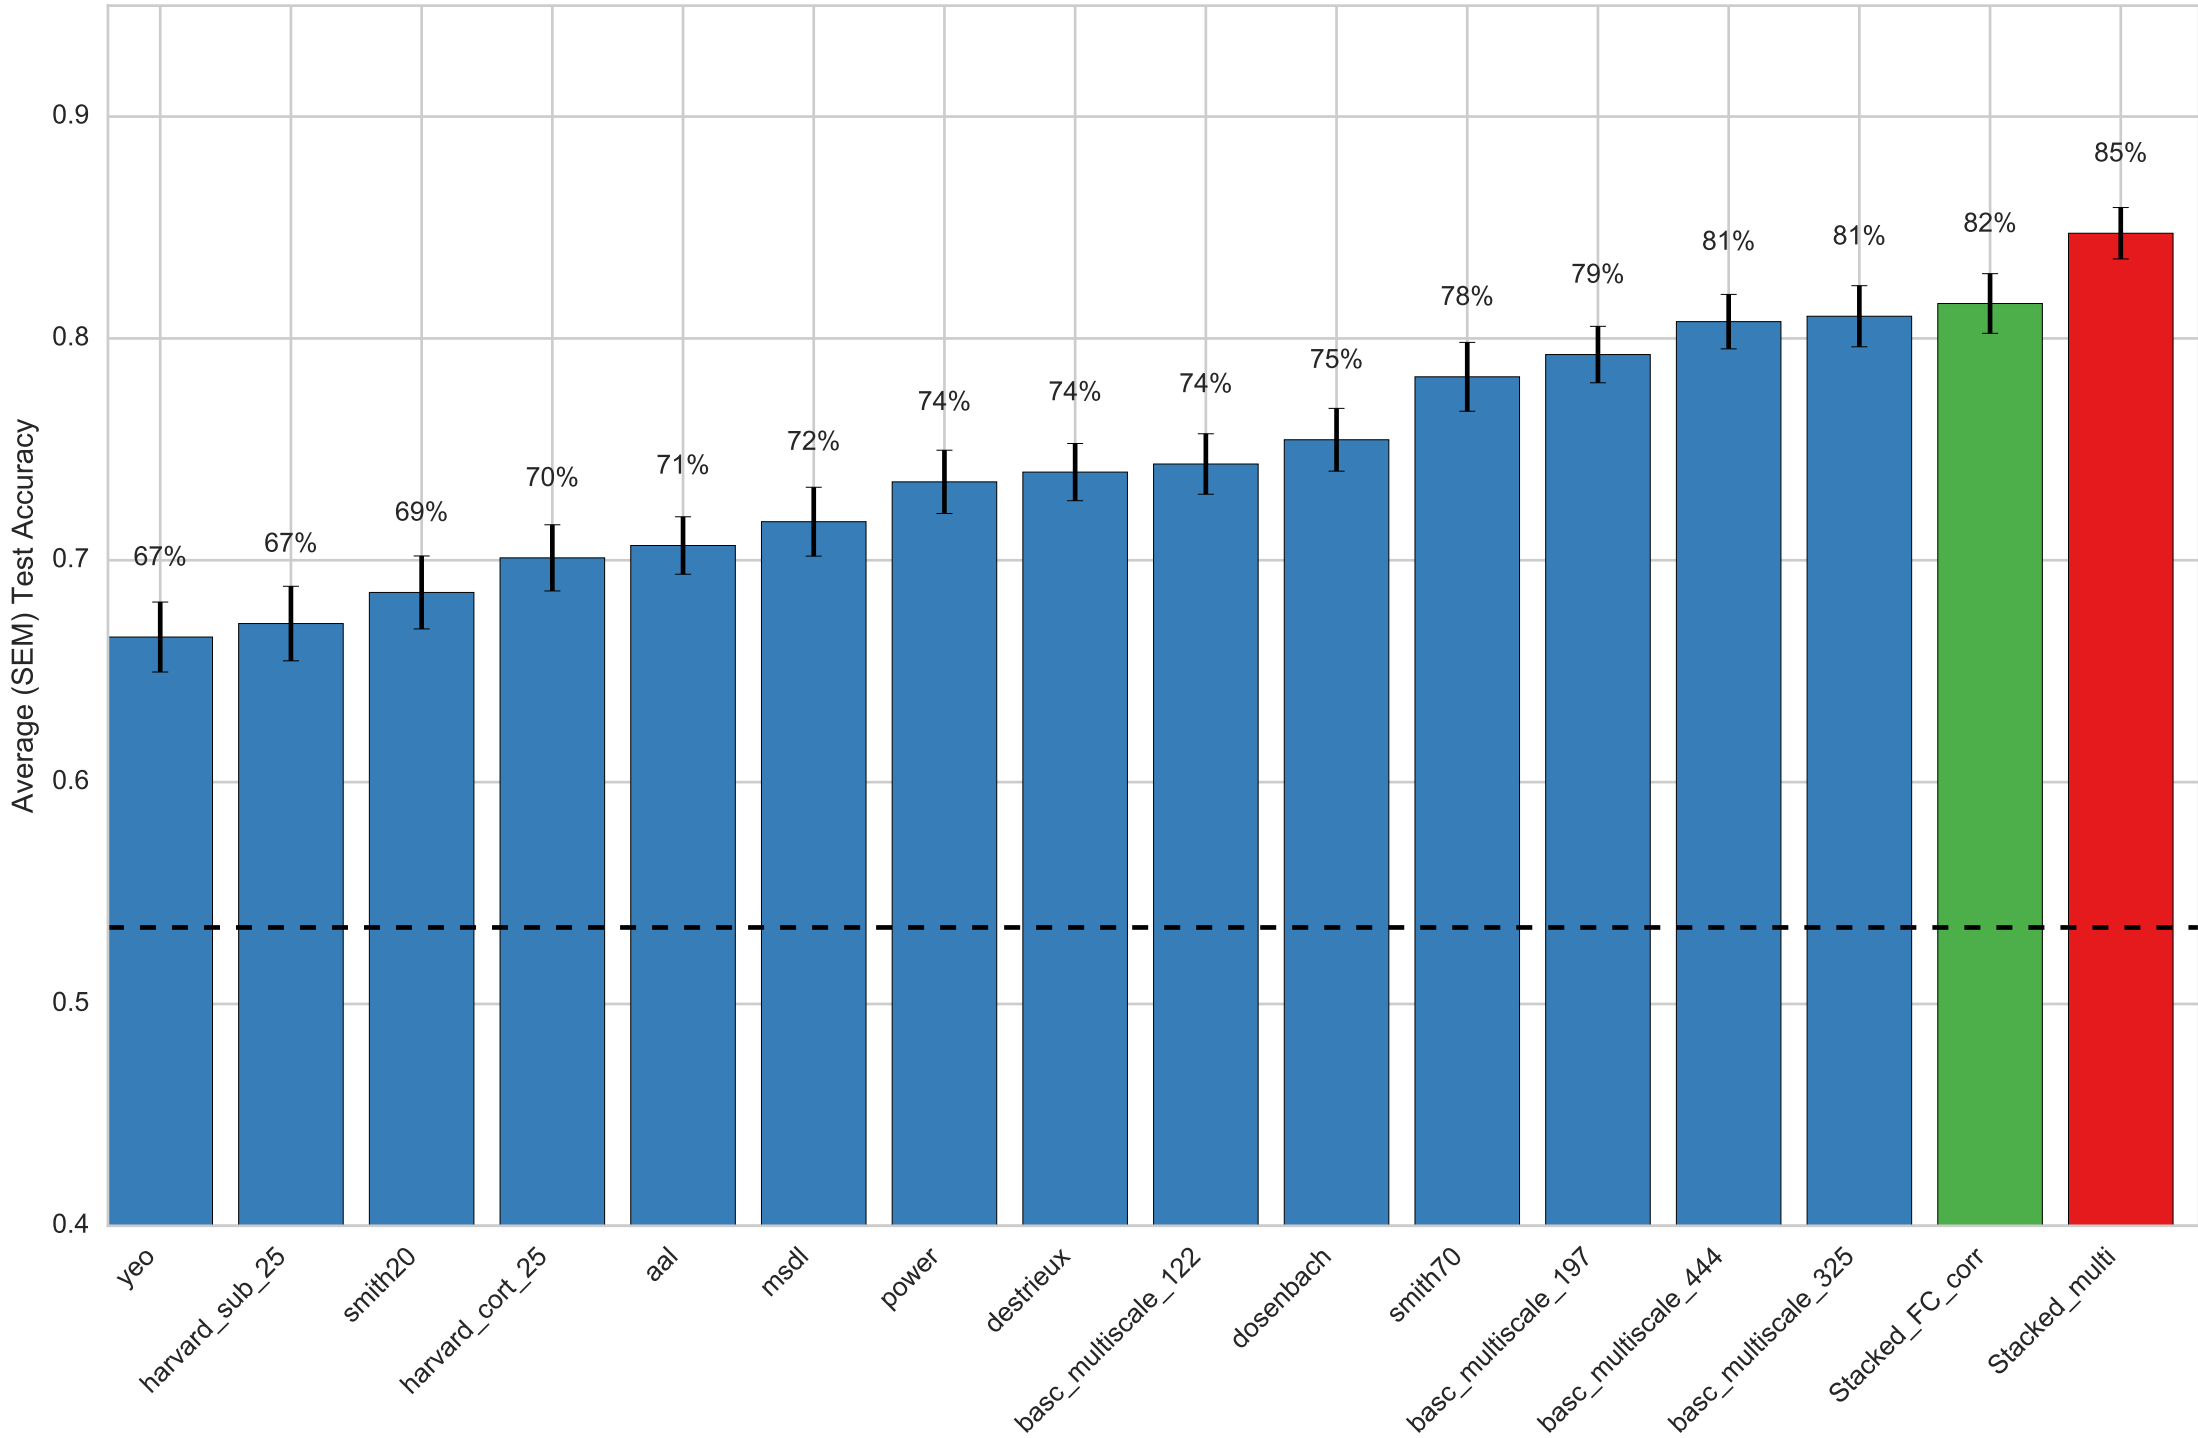



FC\_part : 100% Features  
Comparison across 14 parcellations and stacked predictions  
10 fold cross-validation - 5 shuffled iterations

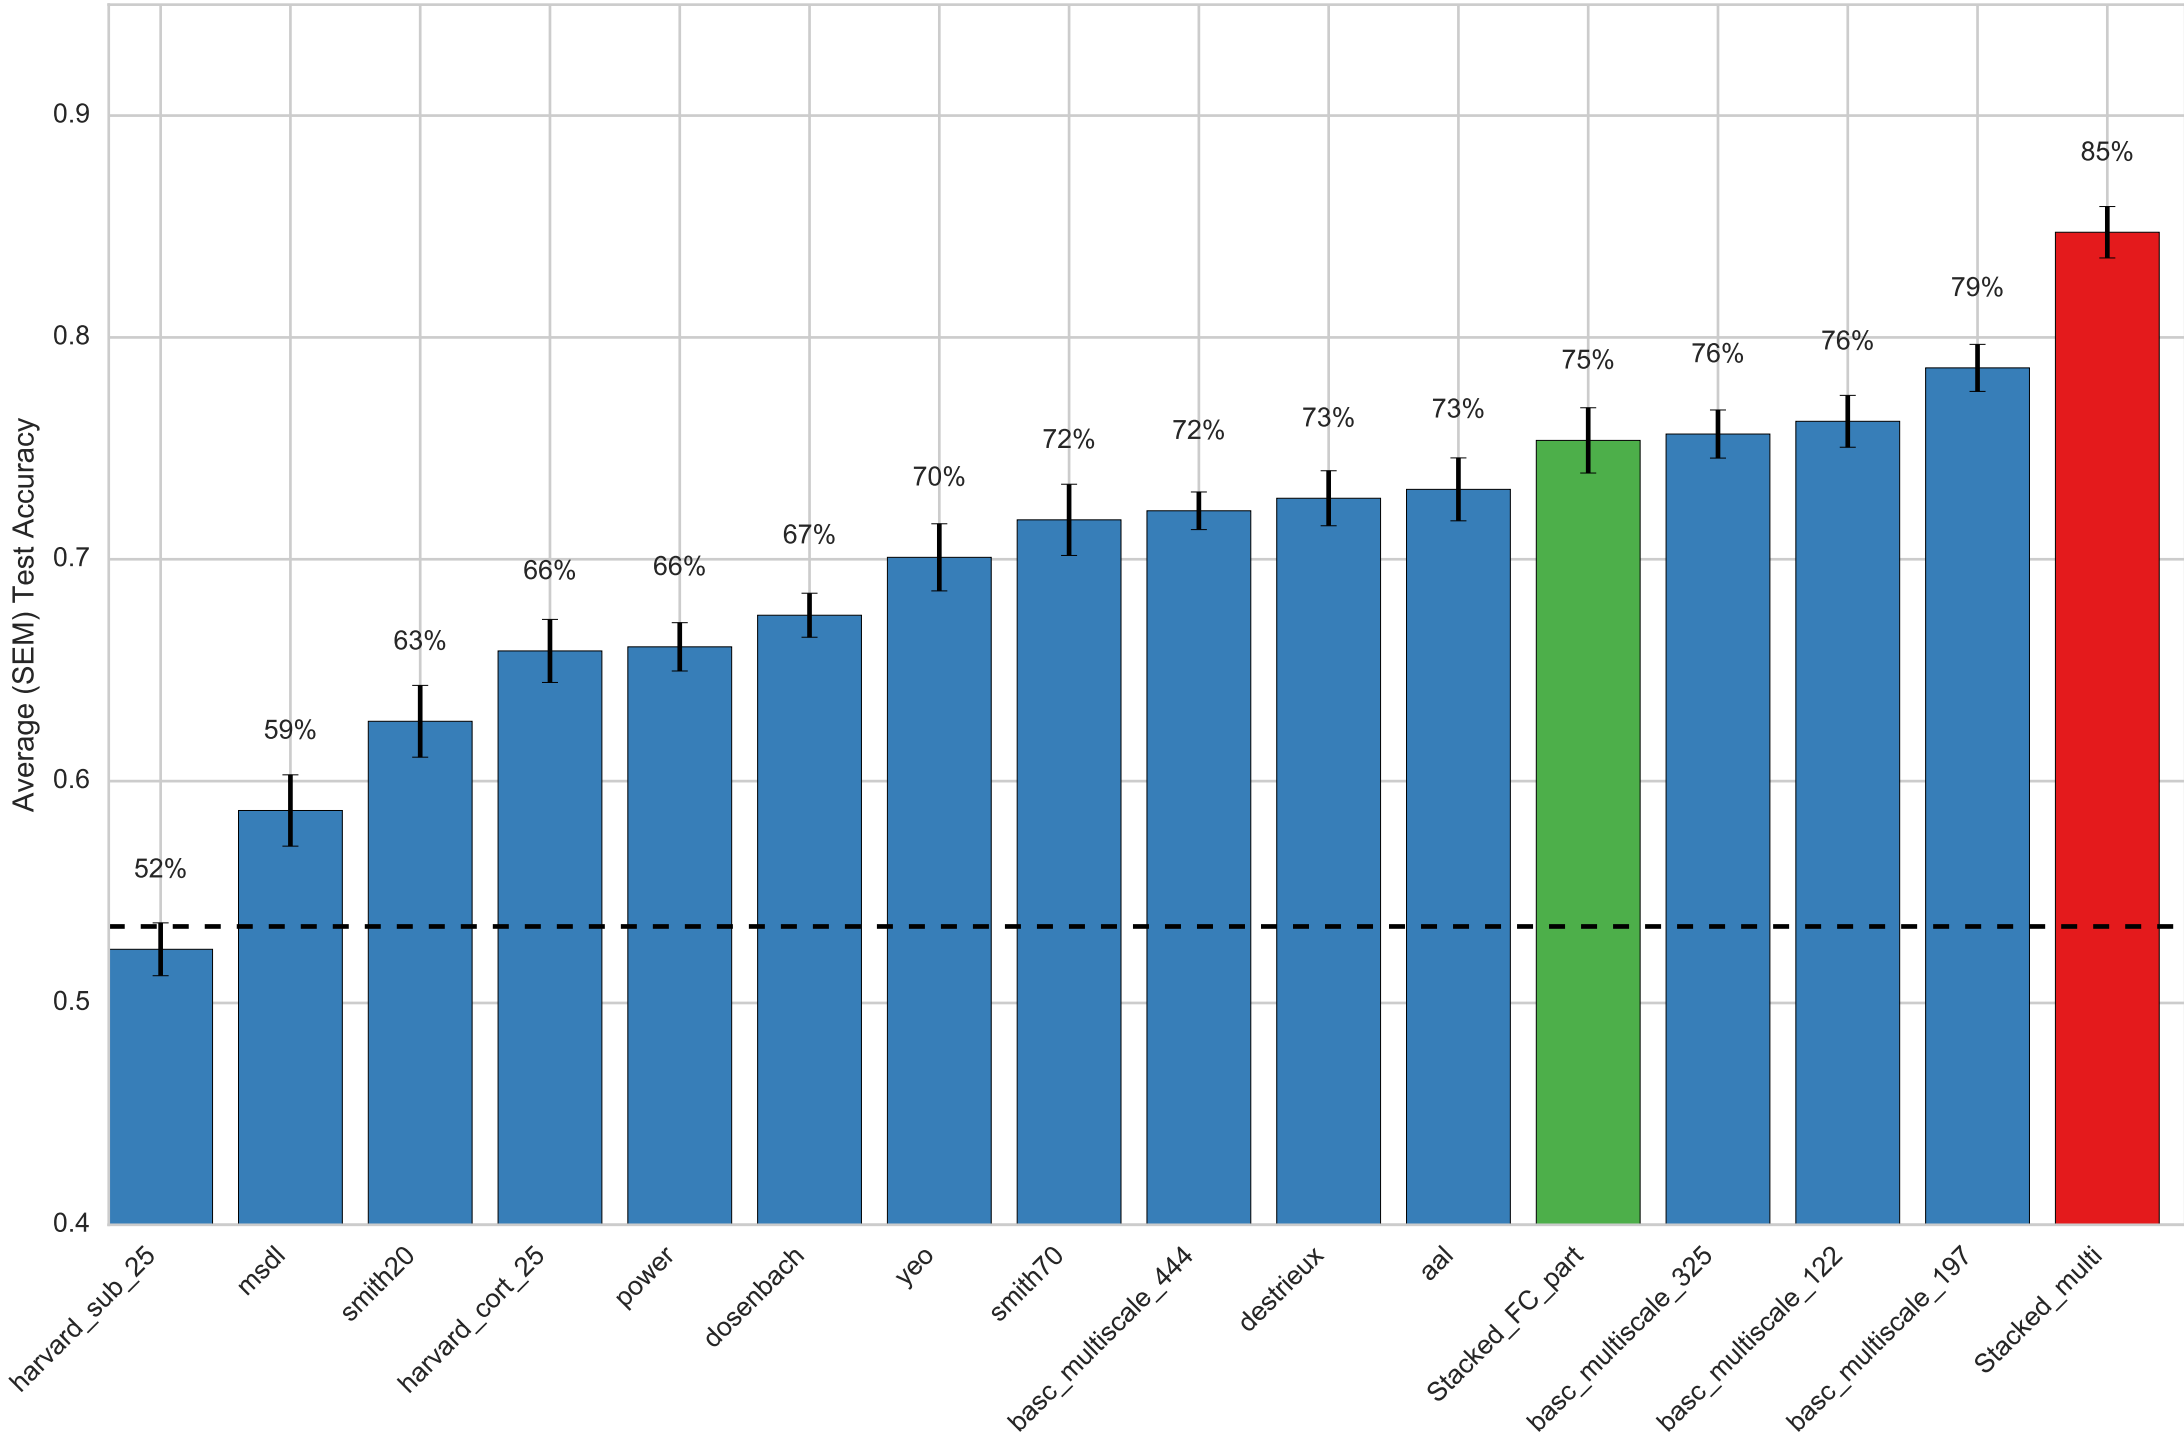

FC\_prec : 100% Features  
Comparison across 14 parcellations and stacked predictions  
10 fold cross-validation - 5 shuffled iterations

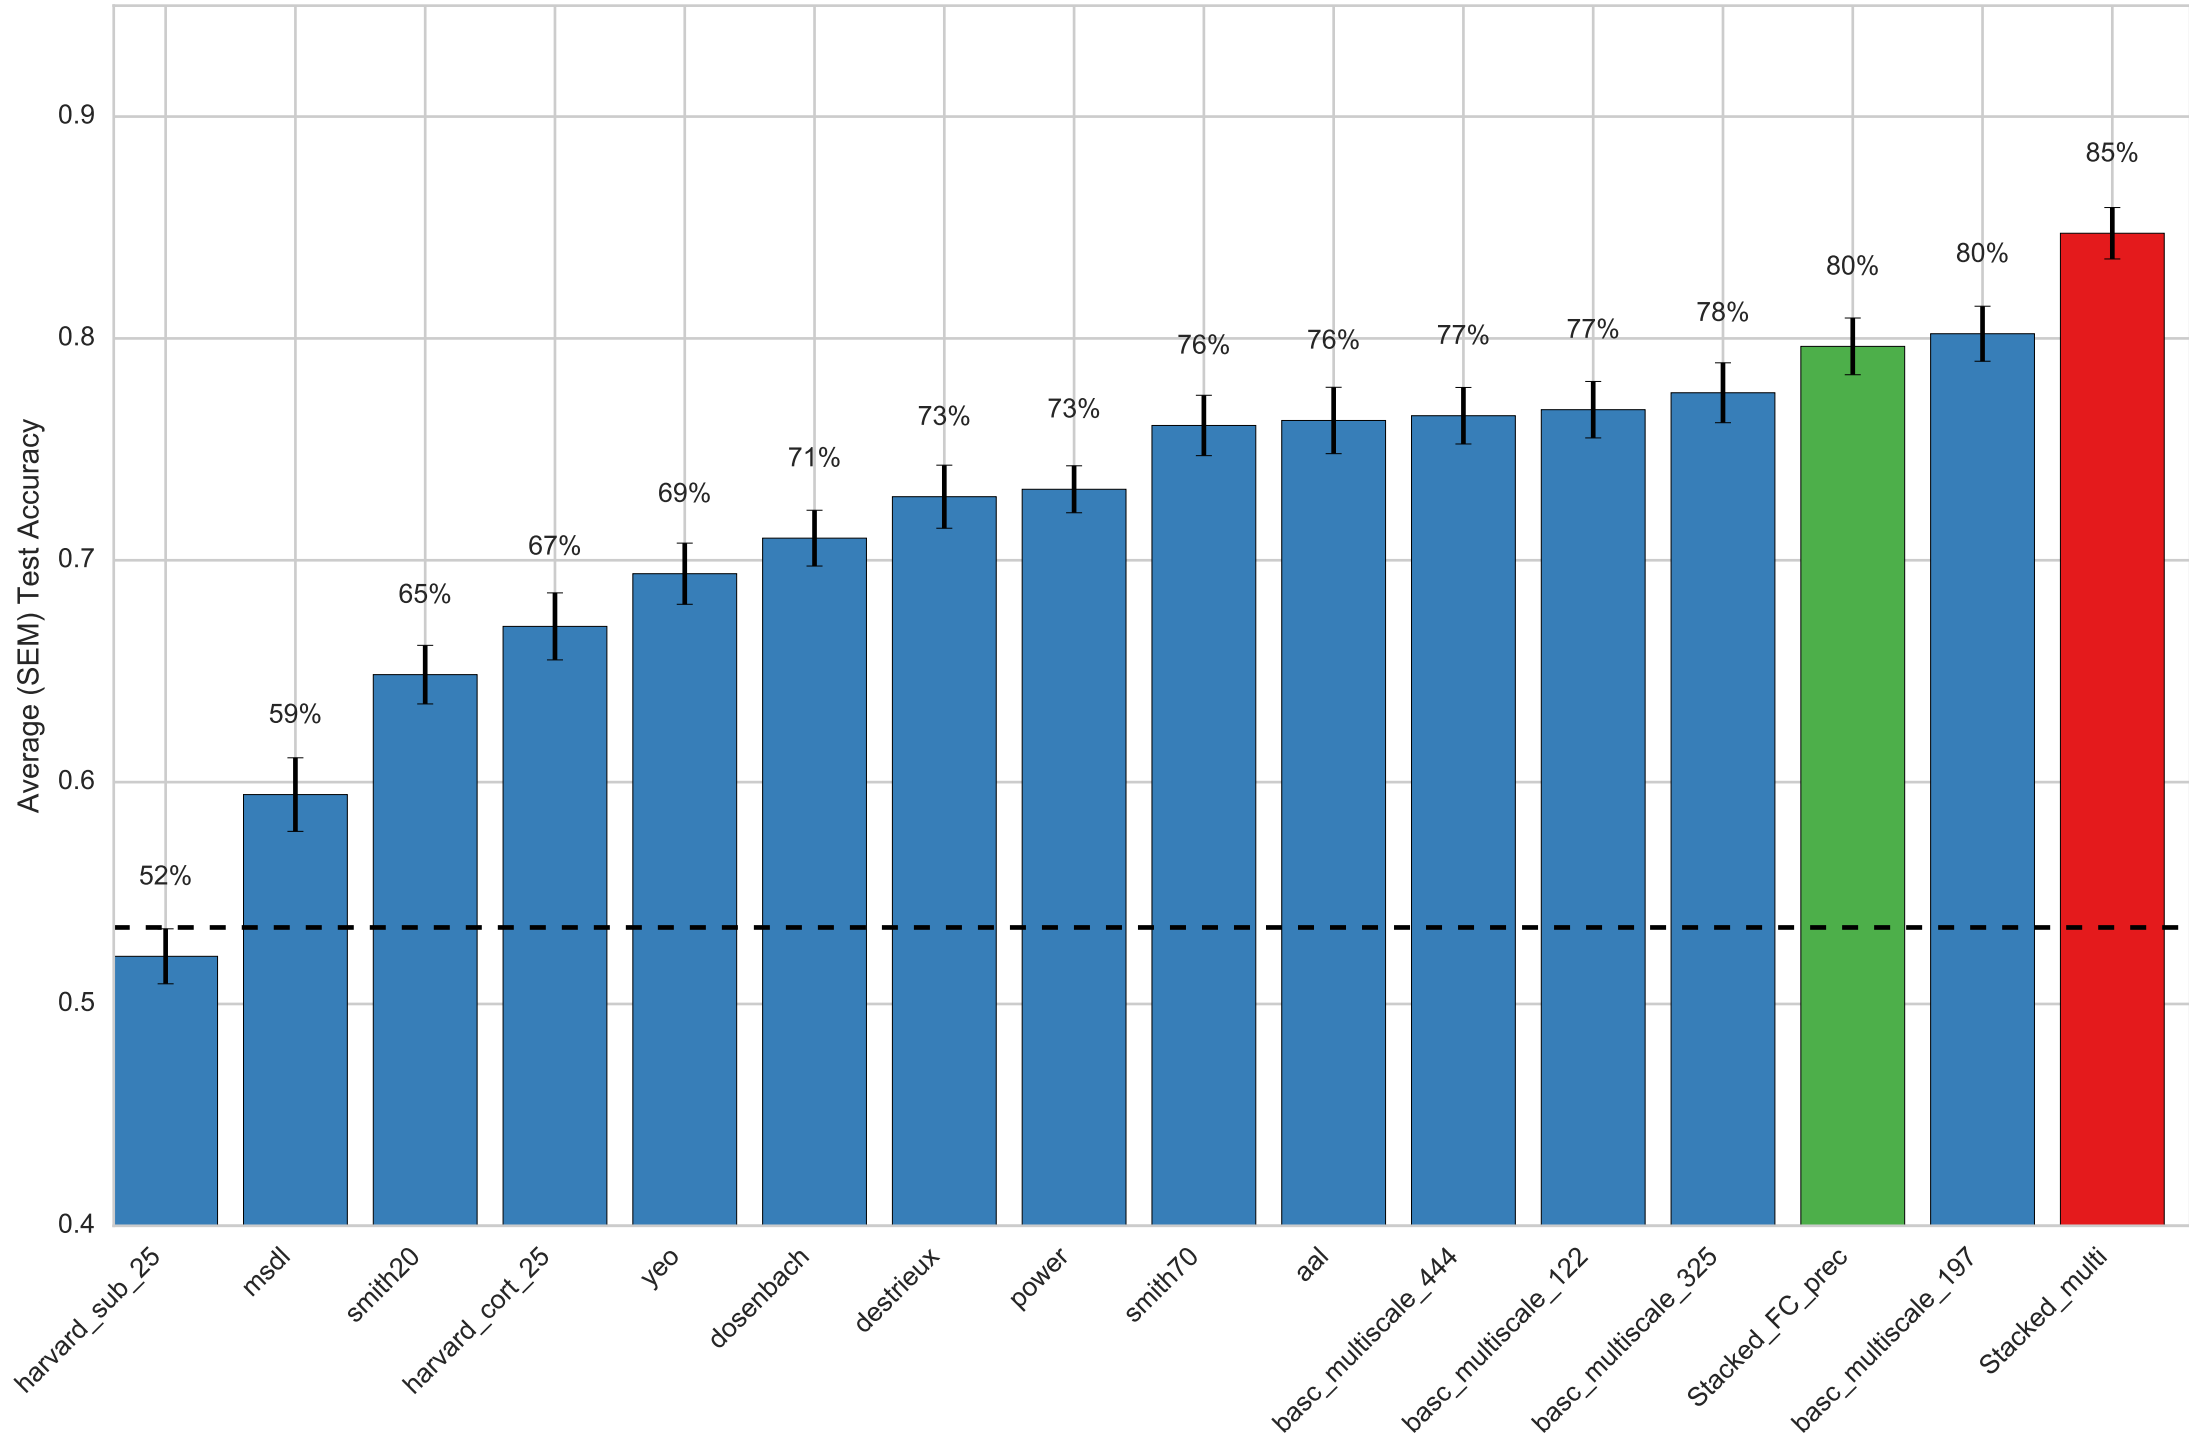

ReHo : 100% Features  
Comparison across 14 parcellations and stacked predictions  
10 fold cross-validation - 5 shuffled iterations

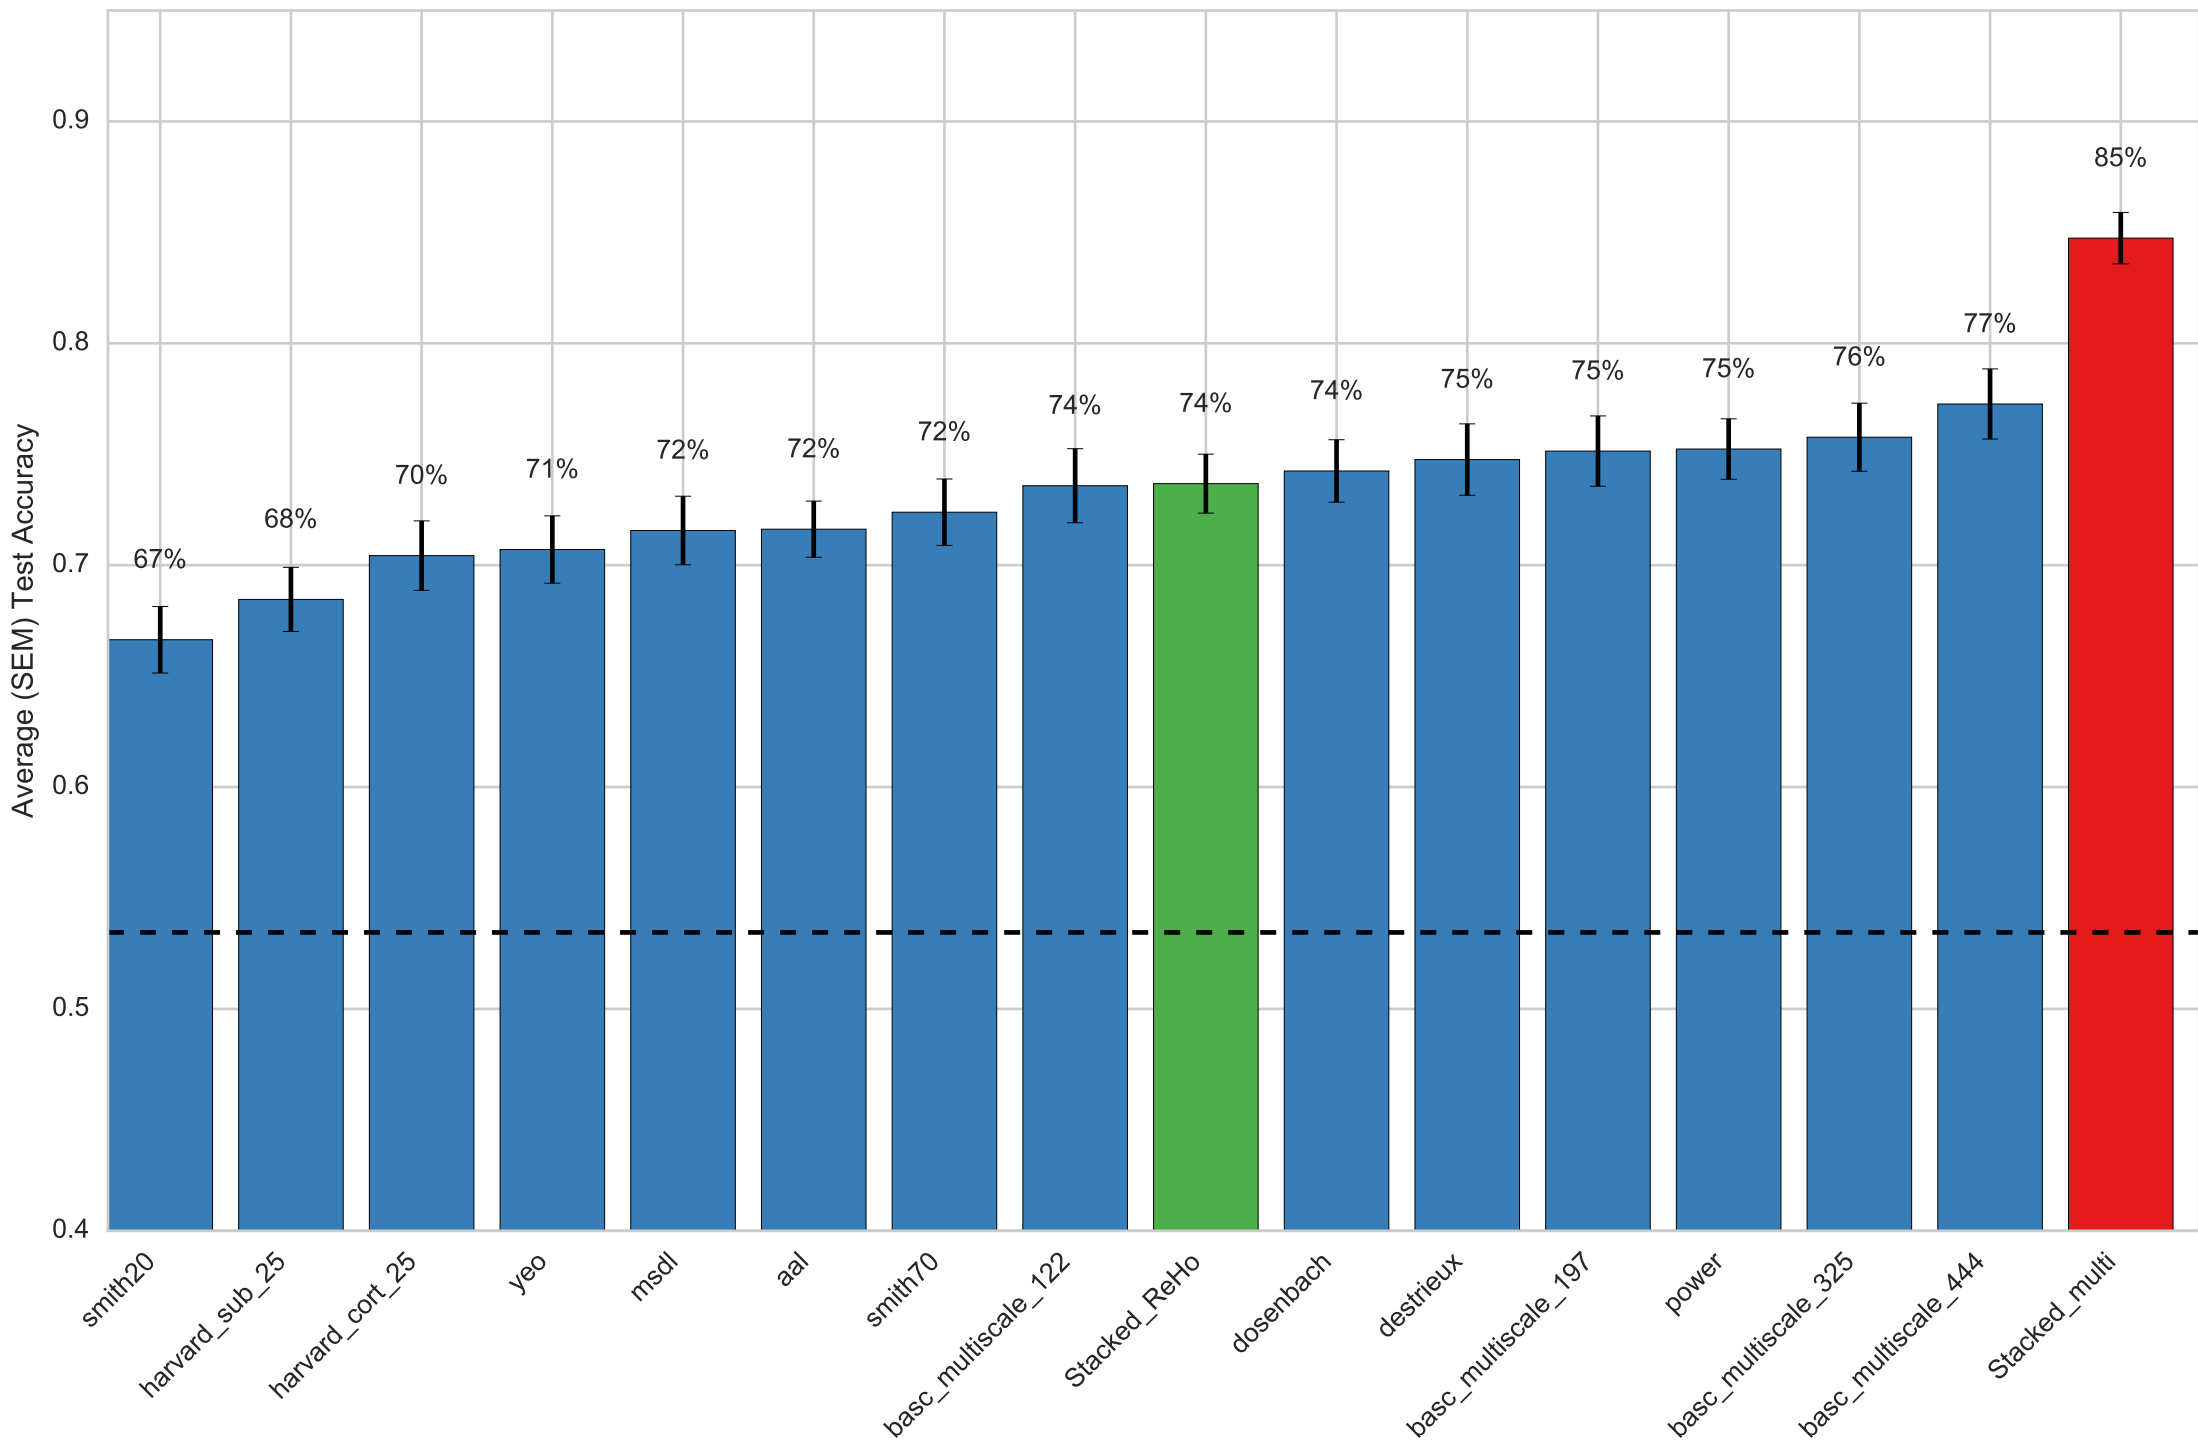

ALFF : 100% Features  
Comparison across 14 parcellations and stacked predictions  
10 fold cross-validation - 5 shuffled iterations

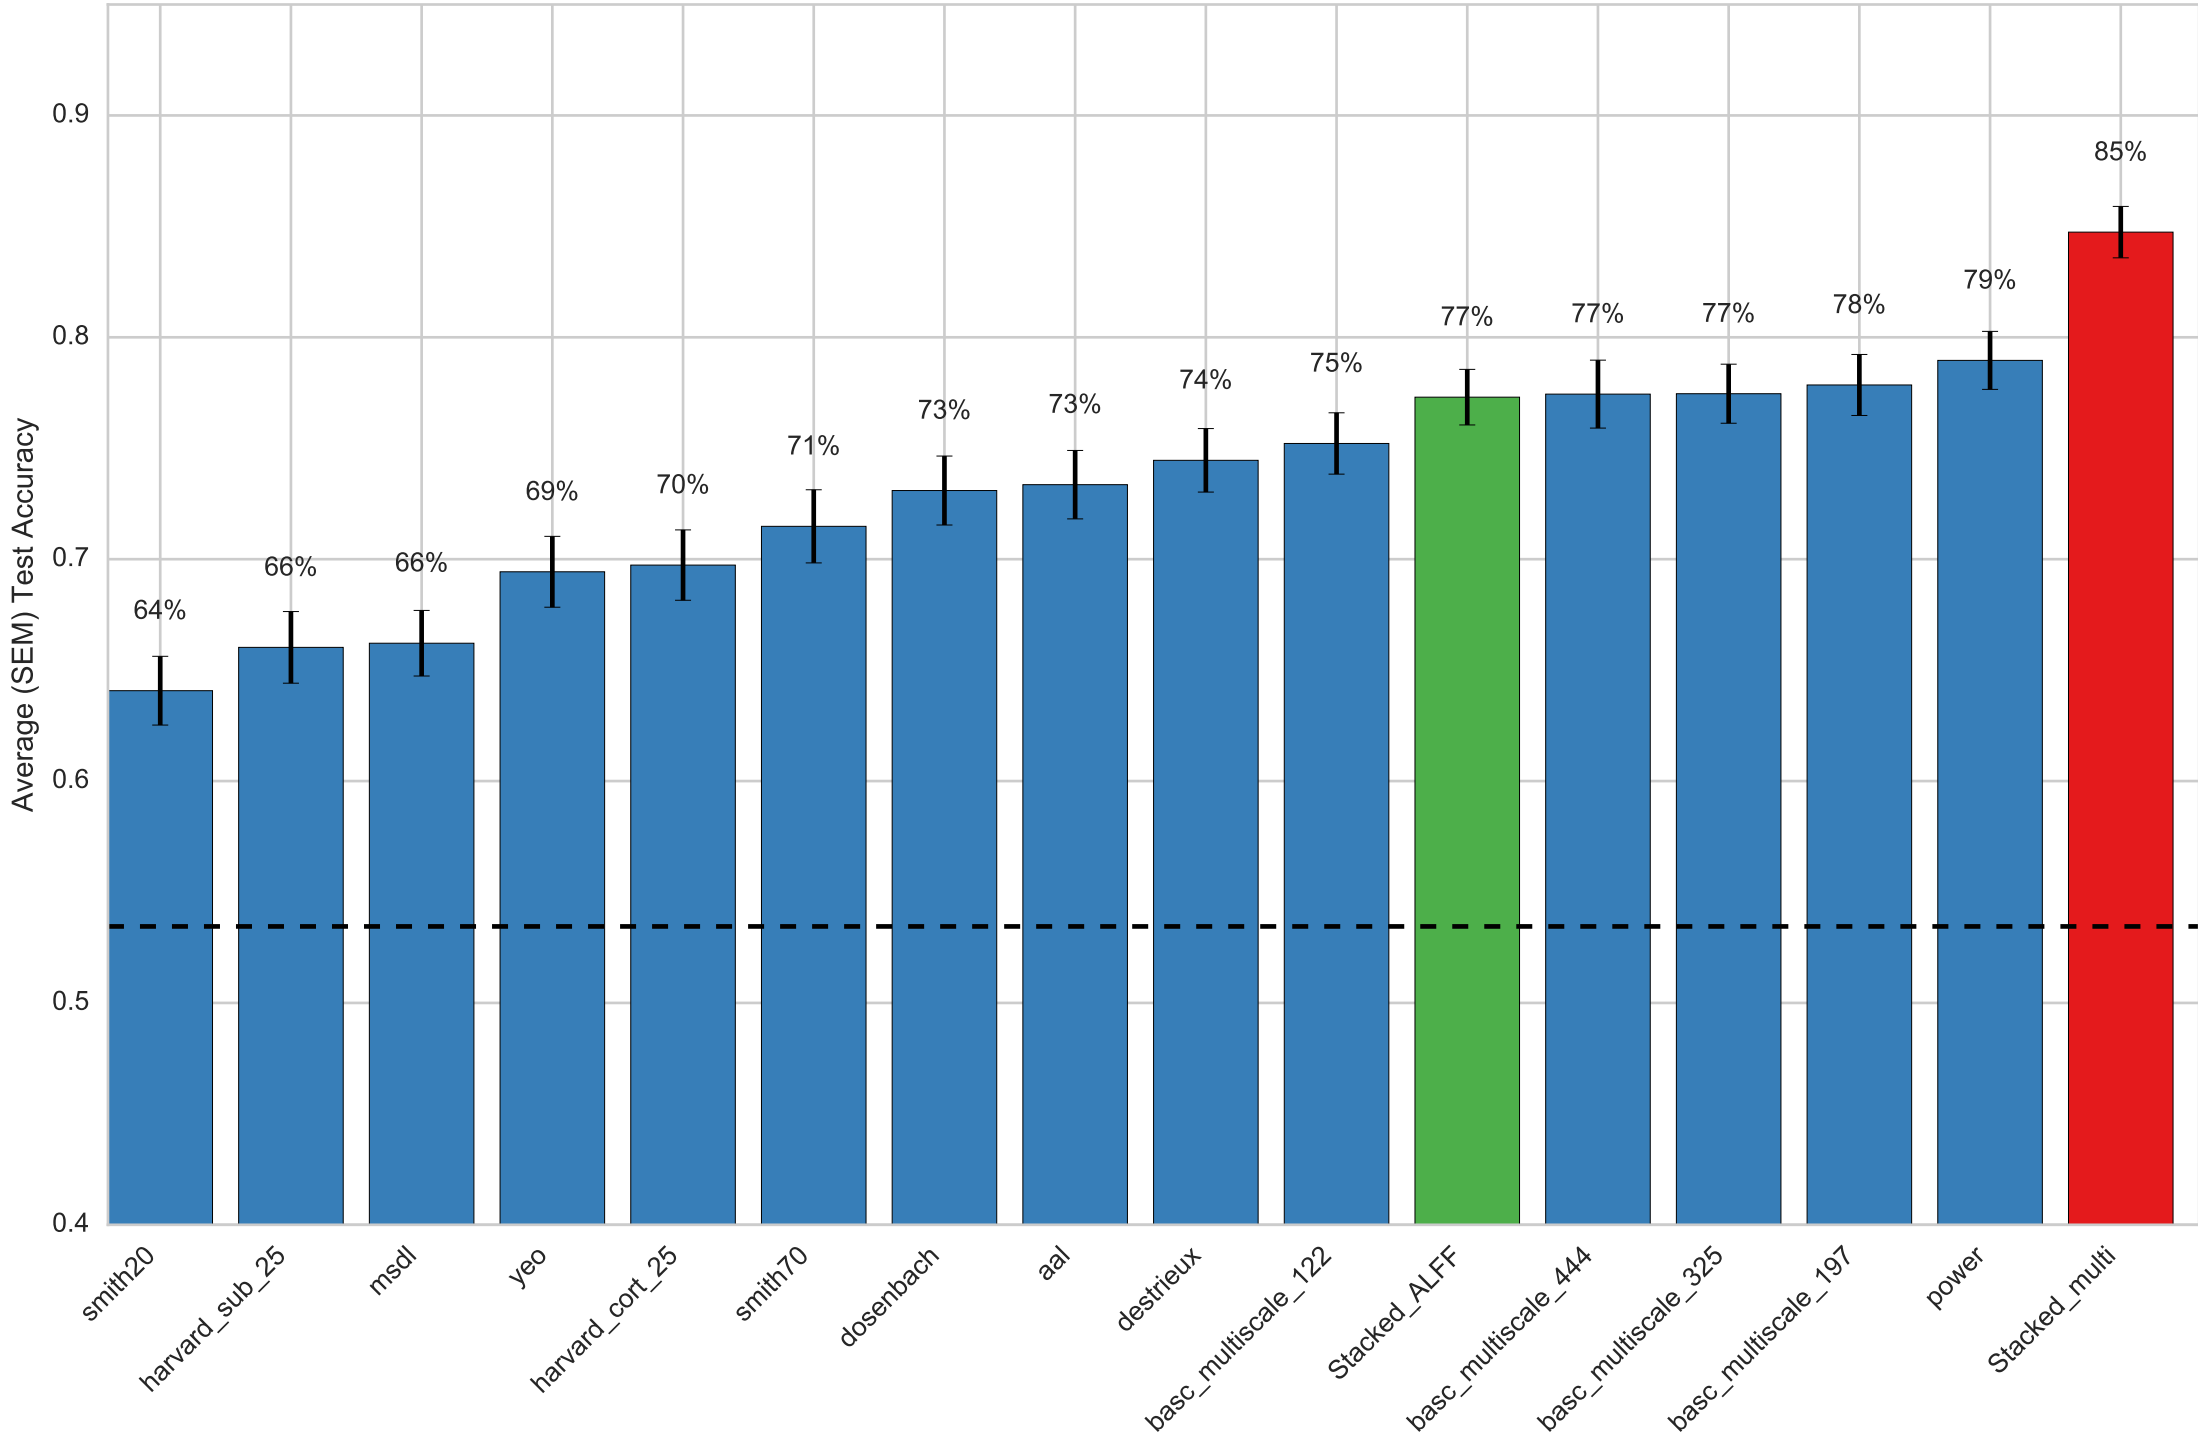

Supplement: 41537_2018_70_MOESM1_ESM.pdf [file 41537_2018_70_MOESM1_ESM.pdf]
